# Supplementary material for: Transcriptomic Responses to Chilling Reveal Potential Chilling Tolerance Mechanisms in Cucumber
Source: Int J Mol Sci. 2022 Oct 25;23(21):12834. doi: 10.3390/ijms232112834 (PMC9657649; doi:10.3390/ijms232112834)
Supplement: Supplementary file 1 [file ijms-23-12834-s001.zip]

Archive with 6 entries (6 files):
- ijms-1927225-table S5.pdf
- Supplementary_Figures.pdf
- Supplementary_Table_S1.xlsx
- Supplementary_Table_S2.xlsx
- Supplementary_Table_S3.xlsx
- Supplementary_Table_S4.xlsx
