# Supplementary material for: Transcriptomic Responses to Chilling Reveal Potential Chilling Tolerance Mechanisms in Cucumber
Source: Int J Mol Sci. 2022 Oct 25;23(21):12834. doi: 10.3390/ijms232112834 (PMC9657649; doi:10.3390/ijms232112834)
Supplement: Supplementary file 1 [file ijms-23-12834-s001.zip › ijms-1927225-table S5.pdf]

Table S5 Sequence alignment of variable region in the promoter of *CsCBF1* in 10 cucumber lines

| Lines | Sequence                                                                |
|-------|-------------------------------------------------------------------------|
| CC    | GATAGTAAAAGAGAAAAGTAGAATTTTCGATGGTGAAGAACAAGTCAAAGTGACACATGTCAGTTCCTGA  |
| R1461 | GATAGTAAAAGAGAAAAGTAGAATCCTTCGATGGTGAAGAACAAGTCAAAGTGACACATGTCAGTTCCTGA |
| 9930  | GATAGTAAAAGAGAAAAGTAGAATCCTTCGATGGTGAAGAACAAGTCAAAGTGACACATGTCAGTTCCTGA |
| HN    | GATAGTAAAAGAGAAAAGTAGAATCCTTCGATGGTGAAGAACAAGTCAAAGTGACACATGTCAGTTCCTGA |
| XSBN  | GATAGTAAAAGAGAAAAGTAGAATCCTTCGATGGTGAAGAACAAGTCAAAGTGACACATGTCAGTTCCTGA |
| HNHY  | GATAGTAAAAGAGAAAAGTAGAATCCTTCGATGGTGAAGAACAAGTCAAAGTGACACATGTCAGTTCCTGA |
| HNHP  | GATAGTAAAAGAGAAAAGTAGAATCCTTCGATGGTGAAGAACAAGTCAAAGTGACACATGTCAGTTCCTGA |
| ZN    | GATAGTAAAAGAGAAAAGTAGAATCCTTCGATGGTGAAGAACAAGTCAAAGTGACACATGTCAGTTCCTGA |
| NT    | GATAGTAAAAGAGAAAAGTAGAATCCTTCGATGGTGAAGAACAAGTCAAAGTGACACATGTCAGTTCCTGA |
| HNND  | GATAGTAAAAGAGAAAAGTAGAATCCTTCGATGGTGAAGAACAAGTCAAAGTGACACATGTCAGTTCCTGA |
| CC    | AGTTGACTCATTGTTTATCAATTTTCATTTTCAAATATCTTTTAGTATTTTATGAATTTAAAAA        |
| R1461 | AGTTGACTCATTGTTTATCAATTTTCATTTTCAAATATCTTTTAGTATTTTATGAATTTAAAAA        |
| 9930  | AGTTGACTCATTGTTTATCAATTTTCATTTTCAAATATCTTTTAGTATTTTATGAATTTAAAAA        |
| HN    | AGTTGACTCATTGTTTATCAATTTTCATTTTCAAATATCTTTTAGTATTTTATGAATTTAAAAA        |
| XSBN  | AGTTGACTCATTGTTTATCAATTTTCATTTTCAAATATCTTTTAGTATTTTATGAATTTAAAAA        |
| HNHY  | AGTTGACTCATTGTTTATCAATTTTCATTTTCAAATATCTTTTAGTATTTTATGAATTTAAAAA        |
| HNHP  | AGTTGACTCATTGTTTATCAATTTTCATTTTCAAATATCTTTTAGTATTTTATGAATTTAAAAA        |
| ZN    | AGTTGACTCATTGTTTATCAATTTTCATTTTCAAATATCTTTTAGTATTTTATGAATTTAAAAA        |
| NT    | AGTTGACTCATTGTTTATCAATTTTCATTTTCAAATATCTTTTAGTATTTTATGAATTTAAAAA        |
| HNND  | AGTTGACTCATTGTTTATCAATTTTCATTTTCAAATATCTTTTAGTATTTTATGAATTTAAAAA        |
| CC    | AATAGAAAAGGGCCAAAGAGAAAAAATAAAAAAATAAAAAAAGGGAAGGTGTCGTTGATGGCGTGGG     |
| R1461 | AATAGAAAAGGGCCAAAGAGAAAAAATAAAAAAATAAAAAAAGGGAAGGTGTCGTTGATGGCGTGGG     |
| 9930  | AATAGAAAAGGGCCAAAGAGAAAAAATAAAAAAATAAAAAAAGGGAAGGTGTCGTTGATGGCGTGGG     |
| HN    | AATAGAAAAGGGCCAAAGAGAAAAAATAAAAAAATAAAAAAAGGGAAGGTGTCGTTGATGGCGTGGG     |
| XSBN  | AATAGAAAAGGGCCAAAGAGAAAAAATAAAAAAATAAAAAAAGGGAAGGTGTCGTTGATGGCGTGGG     |
| HNHY  | AATAGAAAAGGGCCAAAGAGAAAAAATAAAAAAATAAAAAAAGGGAAGGTGTCGTTGATGGCGTGGG     |
| HNHP  | AATAGAAAAGGGCCAAAGAGAAAAAATAAAAAAATAAAAAAAGGGAAGGTGTCGTTGATGGCGTGGG     |
| ZN    | AATAGAAAAGGGCCAAAGAGAAAAAATAAAAAAATAAAAAAAGGGAAGGTGTCGTTGATGGCGTGGG     |
| NT    | AATAGAAAAGGGCCAAAGAGAAAAAATAAAAAAATAAAAAAAGGGAAGGTGTCGTTGATGGCGTGGG     |
| HNND  | AATAGAAAAGGGCCAAAGAGAAAAAATAAAAAAATAAAAAAAGGGAAGGTGTCGTTGATGGCGTGGG     |
| CC    | CAGCCAACACAGGCTGGCTCCTTATCATTTAACTCCGTGTTTCAGTGTTTCACTCTGTGCTTTCATTT    |
| R1461 | CAGCCAACACAGGCTGGCTCCTTATCATTTAACTCCGTGTTTCAGTGTTTCACTCTGTGCTTTCATTT    |
| 9930  | CAGCCAACACAGGCTGGCTCCTTATCATTTAACTCCGTGTTTCAGTGTTTCACTCTGTGCTTTCATTT    |
| HN    | CAGCCAACACAGGCTGGCTCCTTATCATTTAACTCCGTGTTTCAGTGTTTCACTCTGTGCTTTCATTT    |
| XSBN  | CAGCCAACACAGGCTGGCTCCTTATCATTTAACTCCGTGTTTCAGTGTTTCACTCTGTGCTTTCATTT    |
| HNHY  | CAGCCAACACAGGCTGGCTCCTTATCATTTAACTCCGTGTTTCAGTGTTTCACTCTGTGCTTTCATTT    |
| HNHP  | CAGCCAACACAGGCTGGCTCCTTATCATTTAACTCCGTGTTTCAGTGTTTCACTCTGTGCTTTCATTT    |
| ZN    | CAGCCAACACAGGCTGGCTCCTTATCATTTAACTCCGTGTTTCAGTGTTTCACTCTGTGCTTTCATTT    |
| NT    | CAGCCAACACAGGCTGGCTCCTTATCATTTAACTCCGTGTTTCAGTGTTTCACTCTGTGCTTTCATTT    |
| HNND  | CAGCCAACACAGGCTGGCTCCTTATCATTTAACTCCGTGTTTCAGTGTTTCACTCTGTGCTTTCATTT    |
