# Supplementary material for: Transcriptomic Responses to Chilling Reveal Potential Chilling Tolerance Mechanisms in Cucumber
Source: Int J Mol Sci. 2022 Oct 25;23(21):12834. doi: 10.3390/ijms232112834 (PMC9657649; doi:10.3390/ijms232112834)
Supplement: Supplementary file 1 [file ijms-23-12834-s001.zip › Supplementary_Table_S1.xlsx]

## Sheet: Sheet1
Primers used for RT-qPCR
Name	Sequence(5'-3')	Gene_ID
qACS2_F	TGTGAAAGTTCAAACAATTTCA	Csa4G049610
qACS2_R	GGATTTGAAGGATTCGTTAT
qACO2_F	GAAAAGGGGTATTTGAAAA	Csa6G511860
qACO2_R	AATTGCTAACTTTTGTCCCA
qCBF1_F	AGGCATCCGGTTTACAGAGGA	Csa3G180260
qCBF1_R	TTGGAAAAGTACCAAGCCAAA
qCBF2_F	AATTCTGGTAAGTGGGTTTGT	Csa5G174570
qCBF2_R	TAAGAGCGATGGCAGCCACAT
qCBF3_F	ATAAGAAGACGAGGATTTGG	Csa5G155570
qCBF3_R	GTCAGCAAAATTGAGGCAAGCTG
qCBF4_F	TGGCTATTAAAGGTGAGTCTG	Csa3G751440
qCBF4_R	GACGTAAATGTCTCTGCCGT
qACTIN_F	CCCCGATGGGCAGGTAATA	Csa6G484600
qACTIN_R	AAGAGCAGGACGAACAGCAGA
Primers used for constructs
Name	Sequence(5'-3')	Description
pG0800-pCBF1_F	GTCGACGGTATCGATAAGCTTTCAAAACTGAATCGCA	Csa3G180260
pG0800-pCBF1_R	CGCTCTAGAACTAGTGGATCCTTTTTGGAAGTGGGTT
