# Supplementary material for: Transcriptomic Responses to Chilling Reveal Potential Chilling Tolerance Mechanisms in Cucumber
Source: Int J Mol Sci. 2022 Oct 25;23(21):12834. doi: 10.3390/ijms232112834 (PMC9657649; doi:10.3390/ijms232112834)
Supplement: Supplementary file 1 [file ijms-23-12834-s001.zip › Supplementary_Table_S2.xlsx]

## Sheet: Supplementary_Table_S2
Supplementary Table S2. Summary of the sequence reads
Samples	Total reads	Total mapped reads	Multiple mapped	Uniquely mapped	Reads map to '+'	Reads map to '-'
R1461_0h_1	47932618	46744585(97.52%)	1064270(2.22%)	45680315(95.30%)	22836043(47.64%)	22844272(47.66%)
R1461_0h_2	49408286	48035615(97.22%)	1067703(2.16%)	46967912(95.06%)	23476192(47.51%)	23491720(47.55%)
R1461_0h_3	46856792	45558828(97.23%)	1041291(2.22%)	44517537(95.01%)	22250377(47.49%)	22267160(47.52%)
R1461_3h_1	47386956	46405739(97.93%)	1089093(2.30%)	45316646(95.63%)	22651726(47.80%)	22664920(47.83%)
R1461_3h_2	48185114	47045252(97.63%)	1090348(2.26%)	45954904(95.37%)	22970678(47.67%)	22984226(47.70%)
R1461_3h_3	46433890	45296728(97.55%)	1025885(2.21%)	44270843(95.34%)	22129591(47.66%)	22141252(47.68%)
changchun_0h_1	48673102	47489652(97.57%)	1072055(2.20%)	46417597(95.37%)	23200599(47.67%)	23216998(47.70%)
changchun_0h_2	50050428	48808387(97.52%)	1097658(2.19%)	47710729(95.33%)	23844977(47.64%)	23865752(47.68%)
changchun_0h_3	48709494	47323362(97.15%)	1090814(2.24%)	46232548(94.91%)	23107696(47.44%)	23124852(47.48%)
changchun_3h_1	47809794	46481402(97.22%)	1069406(2.24%)	45411996(94.98%)	22701001(47.48%)	22710995(47.50%)
changchun_3h_2	49958398	48685072(97.45%)	1155675(2.31%)	47529397(95.14%)	23755953(47.55%)	23773444(47.59%)
changchun_3h_3	47481208	46559270(98.06%)	1064456(2.24%)	45494814(95.82%)	22740057(47.89%)	22754757(47.92%)
Notes: The name of the samples consists of biological repeat
