# Supplementary material for: Transcriptomic Responses to Chilling Reveal Potential Chilling Tolerance Mechanisms in Cucumber
Source: Int J Mol Sci. 2022 Oct 25;23(21):12834. doi: 10.3390/ijms232112834 (PMC9657649; doi:10.3390/ijms232112834)
Supplement: Supplementary file 1 [file ijms-23-12834-s001.zip › Supplementary_Table_S3.xlsx]

## Sheet: Supplementary_Table_S3
Supplementary Table S3. The DEGs up and down regulated after chilling in CC
gene_id	BaseMean	lfcSE	stat	FoldChange	log2FoldChange	p-value	q-value	Regulation	Expression_changchun_0h_1	Expression_changchun_0h_2	Expression_changchun_0h_3	Expression_changchun_3h_1	Expression_changchun_3h_2	Expression_changchun_3h_3	gene_symbol	description	GO_id	GO_term	pathway	pathway_description
Csa1G002940	57.9503	0.382464	3.79976	2.73829	1.45327	0.000144834	0.00683011	Up	1.71261	2.43143	3.26102	5.81598	7.8662	6.27227		uncharacterized protein LOC101222072 [Cucumis sativus]
Csa1G009680	192.615	0.222238	-5.12404	0.454152	-1.13875	2.99063e-07	3.08747e-05	Down	10.1512	11.2784	7.83394	4.37026	3.88708	4.90835	F1P2.170	transcription factor TCP14 [Cucumis sativus]	GO:0005634,GO:0003700,GO:0043565,GO:0008283,GO:0010229,GO:0031347,GO:0010029,GO:0006355,GO:0009737,GO:0009735,GO:0009739	nucleus|DNA-binding transcription factor activity|sequence-specific DNA binding|cell proliferation|inflorescence development|regulation of defense response|regulation of seed germination|regulation of transcription, DNA-templated|response to abscisic acid|response to cytokinin|response to gibberellin
Csa1G011540	71.112	0.315759	-3.49603	0.465256	-1.1039	0.000472241	0.0181111	Down	3.52386	5.03924	3.64227	1.82828	2.07023	1.69307	MFB13.4	transcription factor UNE10 [Cucumis sativus]	GO:0016607,GO:0005634,GO:0003700,GO:0003690,GO:0046983,GO:0009704,GO:0009585,GO:0006355,GO:0009416	nuclear speck|nucleus|DNA-binding transcription factor activity|double-stranded DNA binding|protein dimerization activity|de-etiolation|red, far-red light phototransduction|regulation of transcription, DNA-templated|response to light stimulus
Csa1G015600	467.041	0.13902	7.74094	2.10839	1.07614	9.86836e-15	2.94493e-12	Up	8.3128	7.2778	7.61831	17.0165	14.9233	16.4454		uncharacterized protein LOC101220579 [Cucumis sativus]
Csa1G022530	778.793	0.183546	-8.62379	0.33382	-1.58286	6.47726e-18	2.81157e-15	Down	46.5808	48.938	52.6225	14.8954	19.3437	14.401		hypothetical protein Csa_013978 [Cucumis sativus]
Csa1G025020	2886.44	0.165419	7.89251	2.47182	1.30557	2.96161e-15	9.58708e-13	Up	75.0111	73.5886	95.2631	209.134	205.351	179.481	T10F20.22	probable calcium-binding protein CML27 [Cucumis sativus]	GO:0005886,GO:0005773,GO:0005509	plasma membrane|vacuole|calcium ion binding	csv04626	Plant-pathogen interaction
Csa1G025050	180.887	0.23553	4.95513	2.24558	1.16708	7.22805e-07	6.70138e-05	Up	3.13693	2.71613	2.79152	7.71766	5.13767	6.35015	T1N15.22/T1N15.23	phosphomethylethanolamine N-methyltransferase isoform X2 [Cucumis sativus]	GO:0005737,GO:0000234,GO:0052667,GO:0006656	cytoplasm|phosphoethanolamine N-methyltransferase activity|phosphomethylethanolamine N-methyltransferase activity|phosphatidylcholine biosynthetic process	csv00564	Glycerophospholipid metabolism
Csa1G025190	26.2057	0.588229	-3.31262	0.259071	-1.94858	0.000924254	0.0315784	Down	3.25758	3.11193	2.47855	1.15073	0.274654	0.859157		uncharacterized protein LOC101203132 [Cucumis sativus]
Csa1G033080	242.083	0.168938	-7.92806	0.395198	-1.33935	2.22604e-15	7.59198e-13	Down	9.70948	8.89575	8.94159	3.81512	3.43715	3.50373	T17M13.12	protein PHYTOCHROME KINASE SUBSTRATE 1 [Cucumis sativus]	GO:0005737,GO:0005886,GO:0009638,GO:0009958,GO:0010017,GO:0009585,GO:0010218,GO:0010114	cytoplasm|plasma membrane|phototropism|positive gravitropism|red or far-red light signaling pathway|red, far-red light phototransduction|response to far red light|response to red light
Csa1G042580	42.3039	0.462608	-7.01428	0.105487	-3.24486	2.31132e-12	5.25522e-10	Down	15.4735	12.0503	11.1004	1.5373	0.978456	1.53037		hypothetical protein Csa_013579 [Cucumis sativus]
Csa1G045990	30.551	0.427087	-3.17389	0.390793	-1.35552	0.00150412	0.0456713	Down	0.909696	1.31919	1.27469	0.458492	0.43773	0.456427	T13D8.8	U-box domain-containing protein 19 [Cucumis sativus]	GO:0005737,GO:0005634,GO:0004842,GO:0010029	cytoplasm|nucleus|ubiquitin-protein transferase activity|regulation of seed germination
Csa1G046230	55.4532	0.341174	-3.67698	0.419142	-1.25449	0.000236014	0.010315	Down	2.26794	2.24031	2.03803	0.907315	1.08279	0.705648	T18B16.150	probable apyrase 7 isoform X2 [Cucumis sativus]	GO:0016021,GO:0102490,GO:0005524,GO:0102485,GO:0102486,GO:0102491,GO:0102488,GO:0102487,GO:0102489,GO:0009901,GO:0010584	integral component of membrane|8-oxo-dGTP phosphohydrolase activity|ATP binding|dATP phosphohydrolase activity|dCTP phosphohydrolase activity|dGTP phosphohydrolase activity|dTTP phosphohydrolase activity|dUTP phosphohydrolase activity|GTP phosphohydrolase activity|anther dehiscence|pollen exine formation
Csa1G062380	1749.76	0.170173	5.919	2.01008	1.00725	3.23898e-09	4.61651e-07	Up	31.8879	29.6828	24.7633	49.7462	64.764	56.6254	F4H6.13	5'-adenylylsulfate reductase 1, chloroplastic [Cucumis sativus]	GO:0009507,GO:0009570,GO:0009536,GO:0051539,GO:0033741,GO:0009973,GO:0046872,GO:0045454,GO:0019344,GO:0000103,GO:0019419	chloroplast|chloroplast stroma|plastid|4 iron, 4 sulfur cluster binding|adenylyl-sulfate reductase (glutathione) activity|adenylyl-sulfate reductase activity|metal ion binding|cell redox homeostasis|cysteine biosynthetic process|sulfate assimilation|sulfate reduction	csv00920	Sulfur metabolism
Csa1G073010	119.049	0.238831	-4.36313	0.485636	-1.04205	1.28217e-05	0.000896999	Down	12.3274	10.2402	9.64741	5.64739	4.6771	5.14781		putative Glucose-fructose oxidoreductase domain-containing protein 2 [Cucumis melo var. makuwa]
Csa1G073890	71.6258	0.37816	3.15468	2.28624	1.19298	0.00160674	0.0482501	Up	0.981749	0.781725	1.68939	2.41276	2.73861	2.64208	T32N4.9	L-type lectin-domain containing receptor kinase VII.1 [Cucumis sativus]
Csa1G073900	38.2231	0.626749	-3.28844	0.239646	-2.06102	0.00100745	0.0339353	Down	2.57399	4.43089	1.86484	0.971244	0.231816	0.918526		uncharacterized protein LOC101209953 [Cucumis sativus]
Csa1G075060	151.909	0.454444	8.2526	13.4575	3.75034	1.54988e-16	6.04104e-14	Up	0.93745	2.35287	1.02623	15.0777	26.7997	15.0098	ERF-3	ethylene-responsive transcription factor 11 [Cucumis sativus]	GO:0005634,GO:0003677,GO:0003700,GO:0006952,GO:0009873	nucleus|DNA binding|DNA-binding transcription factor activity|defense response|ethylene-activated signaling pathway
Csa1G132110	271.908	0.252884	-5.80635	0.3614	-1.46833	6.38491e-09	8.71038e-07	Down	15.8168	17.5846	18.4073	5.22215	8.00221	5.15494		uncharacterized protein LOC101217269 [Cucumis sativus]
Csa1G166760	167.134	0.251021	-4.06662	0.492841	-1.0208	4.77004e-05	0.00281377	Down	13.8919	11.7447	9.81424	6.85922	5.01379	5.38798	F7K24.10	protein FAF-like, chloroplastic [Cucumis sativus]
Csa1G168920	1178.44	0.190245	12.8102	5.41544	2.43708	1.43714e-37	1.52489e-34	Up	17.5547	17.6987	23.9505	105.259	115.072	95.3922	T6G21.2	LOW QUALITY PROTEIN: probable CCR4-associated factor 1 homolog 11 [Cucumis sativus]	GO:0030015,GO:0005634,GO:0000932,GO:0008408,GO:0046872,GO:0004535,GO:0003723,GO:0042742,GO:0043928,GO:0017148,GO:0000289	CCR4-NOT core complex|nucleus|P-body|3'-5' exonuclease activity|metal ion binding|poly(A)-specific ribonuclease activity|RNA binding|defense response to bacterium|exonucleolytic nuclear-transcribed mRNA catabolic process involved in deadenylation-dependent decay|negative regulation of translation|nuclear-transcribed mRNA poly(A) tail shortening	csv03018	RNA degradation
Csa1G181530	49.0792	0.640758	3.25717	4.24881	2.08706	0.00112527	0.0371185	Up	1.31689	1.19355	2.88322	3.51382	12.7665	6.1215		uncharacterized protein LOC105434476 [Cucumis sativus]
Csa1G264010	151.714	0.220615	-7.16222	0.334461	-1.58009	7.93826e-13	1.89516e-10	Down	9.50867	9.94079	11.9714	3.22657	3.57155	3.58445		uncharacterized protein LOC101205285 [Cucumis sativus]
Csa1G264020	469.396	0.265574	-3.81141	0.495786	-1.01221	0.000138176	0.0065811	Down	13.6676	13.8285	18.3194	5.73224	9.78947	6.81328		uncharacterized serine-rich protein C215.13 [Cucumis sativus]
Csa1G264520	45.2102	0.365726	-4.19571	0.345205	-1.53448	2.72024e-05	0.00174342	Down	4.84405	5.11562	6.40972	1.56562	2.04541	1.96872		PREDICTED: uncharacterized protein LOC103487396 [Cucumis melo]
Csa1G265120	841.092	0.347941	3.18298	2.1547	1.10749	0.00145766	0.0449756	Up	9.94091	12.9175	26.519	34.0184	37.5966	33.3346		uncharacterized protein LOC101215379 [Cucumis sativus]
Csa1G265630	311.755	0.435303	7.77873	10.4549	3.3861	7.32557e-15	2.22081e-12	Up	2.58199	2.94019	6.44864	28.9505	59.7554	33.9322		uncharacterized protein LOC105434480 [Cucumis sativus]
Csa1G303710	6.07962	1.56015	3.25425	33.7574	5.07713	0.00113692	0.0374379	Up	0	0	0.10764	0.874551	1.983	0.870613		hypothetical protein Csa_004669 [Cucumis sativus]
Csa1G364460	67.285	0.305094	-5.64566	0.303032	-1.72246	1.64547e-08	2.12344e-06	Down	5.40159	5.5282	5.67968	1.90462	1.24688	1.84187	F15N18.180	ethylene-responsive transcription factor TINY [Cucumis sativus]	GO:0005634,GO:0003700,GO:0043565,GO:0009873,GO:0045893	nucleus|DNA-binding transcription factor activity|sequence-specific DNA binding|ethylene-activated signaling pathway|positive regulation of transcription, DNA-templated
Csa1G366990	79.4904	0.421077	4.13321	3.34128	1.7404	3.57733e-05	0.00221112	Up	1.45819	1.58877	0.762258	5.06714	2.62041	4.97426		uncharacterized protein LOC105435738 [Cucumis sativus]
Csa1G418800	158.036	0.402431	-4.57754	0.278907	-1.84215	4.70474e-06	0.000369397	Down	20.6633	22.5969	9.17922	5.59343	3.3547	5.56824	MRI1.4	protein GLUTAMINE DUMPER 1 [Cucumis sativus]	GO:0016021,GO:0006865,GO:0019048,GO:0080143,GO:0009615,GO:0032940	integral component of membrane|amino acid transport|modulation by virus of host morphology or physiology|regulation of amino acid export|response to virus|secretion by cell
Csa1G422470	394.996	0.340932	6.75792	4.93822	2.30399	1.39988e-11	2.75633e-09	Up	5.29411	7.30423	3.66031	25.8978	16.8383	37.4588	F14M19.90	hypothetical protein Csa_019870 [Cucumis sativus]	GO:0048046,GO:0005618,GO:0005794,GO:0004553,GO:0016762,GO:0042546,GO:0071555,GO:0010411	apoplast|cell wall|Golgi apparatus|hydrolase activity, hydrolyzing O-glycosyl compounds|xyloglucan:xyloglucosyl transferase activity|cell wall biogenesis|cell wall organization|xyloglucan metabolic process
Csa1G422990	1901.09	0.124527	23.1911	7.40202	2.88792	5.59851e-119	5.3463e-115	Up	20.6397	22.3448	19.5686	142.951	137.996	178.338	F14M19.90	probable xyloglucan endotransglucosylase/hydrolase protein 23-like precursor [Cucumis sativus]	GO:0048046,GO:0005618,GO:0005794,GO:0004553,GO:0016762,GO:0042546,GO:0071555,GO:0010411	apoplast|cell wall|Golgi apparatus|hydrolase activity, hydrolyzing O-glycosyl compounds|xyloglucan:xyloglucosyl transferase activity|cell wall biogenesis|cell wall organization|xyloglucan metabolic process	csv04075	Plant hormone signal transduction
Csa1G470240	117.598	0.621377	4.28397	6.32893	2.66196	1.83585e-05	0.00123461	Up	0.94928	1.58059	2.96676	4.17189	19.3063	10.6135		uncharacterized protein LOC105434498 [Cucumis sativus]
Csa1G479630	2476.08	0.353614	4.09503	2.72841	1.44806	4.22115e-05	0.00253521	Up	25.9971	30.1306	60.5329	73.939	135.786	104.014	F9K21.220	mitogen-activated protein kinase 3-like [Cucumis sativus]	GO:0005737,GO:0005634,GO:0005524,GO:0004707,GO:0004672,GO:0009738,GO:0010120,GO:0042742,GO:0050832,GO:0010229,GO:0035556,GO:0048481,GO:0009626,GO:0009555,GO:0010183,GO:1901002,GO:0080136,GO:0006468,GO:0010468,GO:0009617,GO:0010200,GO:0009409,GO:0050826,GO:1902065,GO:0006970,GO:0006979,GO:0010224,GO:0009414,GO:0009611	cytoplasm|nucleus|ATP binding|MAP kinase activity|protein kinase activity|abscisic acid-activated signaling pathway|camalexin biosynthetic process|defense response to bacterium|defense response to fungus|inflorescence development|intracellular signal transduction|plant ovule development|plant-type hypersensitive response|pollen development|pollen tube guidance|positive regulation of response to s…	csv04016,csv04626	MAPK signaling pathway - plant|Plant-pathogen interaction
Csa1G523610	2158.16	0.163676	6.89326	2.18595	1.12826	5.45273e-12	1.15713e-09	Up	23.7229	24.1473	30.3363	57.9264	59.3881	51.1113	F22G5.9	scarecrow-like protein 34 [Cucumis sativus]	GO:0005829,GO:0005634,GO:0003700,GO:0043565,GO:0045893,GO:0006355,GO:0010200,GO:0009410	cytosol|nucleus|DNA-binding transcription factor activity|sequence-specific DNA binding|positive regulation of transcription, DNA-templated|regulation of transcription, DNA-templated|response to chitin|response to xenobiotic stimulus
Csa1G532200	45.541	0.370889	-3.53847	0.402657	-1.31238	0.000402455	0.0161821	Down	2.32699	2.64418	1.95172	0.684745	0.963402	1.11218		uncharacterized protein LOC101223236 [Cucumis sativus]
Csa1G532300	755.988	0.261574	8.35094	4.54533	2.18439	6.77214e-17	2.87424e-14	Up	8.0024	7.45576	9.87963	29.8495	50.2391	33.0342	F23F1.6	probable protein phosphatase 2C 25 [Cucumis sativus]	GO:0005634,GO:0009536,GO:0046872,GO:0004722,GO:0009738,GO:0050832,GO:0009620,GO:0009611	nucleus|plastid|metal ion binding|protein serine/threonine phosphatase activity|abscisic acid-activated signaling pathway|defense response to fungus|response to fungus|response to wounding
Csa1G532310	58.765	0.356757	3.4264	2.33333	1.22239	0.000611649	0.0224651	Up	1.03951	1.04537	1.31957	3.17061	2.59014	2.04999	T26B15.7	mitogen-activated protein kinase kinase kinase 18 [Cucumis sativus]	GO:0005737,GO:0005634,GO:0005524,GO:0004709,GO:0004674,GO:0009738,GO:0032147,GO:0009737,GO:0006970,GO:0023014,GO:0031098	cytoplasm|nucleus|ATP binding|MAP kinase kinase kinase activity|protein serine/threonine kinase activity|abscisic acid-activated signaling pathway|activation of protein kinase activity|response to abscisic acid|response to osmotic stress|signal transduction by protein phosphorylation|stress-activated protein kinase signaling cascade
Csa1G534780	209.067	0.195529	-7.10115	0.381966	-1.38848	1.23722e-12	2.88166e-10	Down	30.2401	24.5826	25.9998	10.2185	10.4465	9.8124		hypothetical protein Csa_023250 [Cucumis sativus]
Csa1G540350	209.42	0.203721	4.9559	2.01338	1.00962	7.19966e-07	6.70138e-05	Up	11.268	9.65699	8.35381	21.032	17.1528	20.1566	CBDAS	tetrahydrocannabinolic acid synthase [Cucumis sativus]	GO:0048046,GO:0102779,GO:0071949	apoplast|cannabidiolate synthase activity|FAD binding
Csa1G542510	49868.3	0.310991	4.45797	2.61424	1.38639	8.27414e-06	0.000610146	Up	1813.97	1533.14	773.716	3713.25	2557.81	4449.26		lectin [Cucumis sativus]	GO:0030246	carbohydrate binding
Csa1G568500	21.6945	0.569491	-3.48574	0.252595	-1.9851	0.000490769	0.018784	Down	1.76951	2.44679	3.6159	0.61205	0.657376	0.685455	F14G9.14	putative F-box protein PP2-B12 [Cucumis sativus]	GO:0005737,GO:0005634,GO:0030246	cytoplasm|nucleus|carbohydrate binding
Csa1G589710	2256.29	0.327436	18.116	61.0466	5.93184	2.38279e-73	9.10178e-70	Up	1.92155	1.55318	3.22102	98.4181	180.398	122.942	T22E16.10	hypothetical protein Csa_007306 [Cucumis sativus]	GO:0005634,GO:0046872,GO:0004518	nucleus|metal ion binding|nuclease activity
Csa1G597720	2382.79	0.226249	-7.52491	0.307253	-1.7025	5.27556e-14	1.4394e-11	Down	158.302	161.531	192.161	39.8301	66.8867	48.0256	T1M15.100	FCS-Like Zinc finger 14 [Cucumis sativus]	GO:0005737,GO:0005634,GO:0046872,GO:0009749,GO:1905582,GO:0042594,GO:0009744	cytoplasm|nucleus|metal ion binding|response to glucose|response to mannose|response to starvation|response to sucrose
Csa1G597730	25.1822	0.993676	5.69036	50.3659	5.65437	1.2677e-08	1.66979e-06	Up	0.0701304	0	0.143308	2.40146	4.44647	3.62219	T29M8.8	ethylene-responsive transcription factor ERF017 [Cucumis sativus]	GO:0005634,GO:0003677,GO:0003700,GO:0009873	nucleus|DNA binding|DNA-binding transcription factor activity|ethylene-activated signaling pathway
Csa1G617380	272.882	0.175839	7.67371	2.54795	1.34934	1.67089e-14	4.76303e-12	Up	5.33299	5.3067	5.69651	12.6128	14.9577	13.4861	F28J12.40	F-box protein At4g18380 [Cucumis sativus]
Csa1G638510	185.657	0.260649	-5.99168	0.338745	-1.56173	2.07681e-09	3.07481e-07	Down	6.58245	7.25157	6.75017	2.28515	2.82898	1.72489		uncharacterized protein LOC101222078 [Cucumis sativus]
Csa1G681130	111.269	0.325942	3.70334	2.30869	1.20708	0.000212779	0.00942893	Up	4.48082	4.10356	2.82602	9.98794	5.97349	10.2287	F22O13.11	PREDICTED: probable low-specificity L-threonine aldolase 1 isoform X1 [Cucumis melo]	GO:0005829,GO:0008732,GO:0004793,GO:0006545,GO:0006567	cytosol|L-allo-threonine aldolase activity|threonine aldolase activity|glycine biosynthetic process|threonine catabolic process	csv00260	Glycine, serine and threonine metabolism
Csa1G703060	833.309	0.140336	13.4082	3.68498	1.88166	5.41398e-41	7.38584e-38	Up	16.9033	20.1543	16.7167	67.1936	65.5667	62.7167		lectin [Cucumis sativus]	GO:0030246	carbohydrate binding
Csa1G707120	103.801	0.283711	-3.59903	0.492746	-1.02108	0.000319407	0.0133487	Down	5.84243	5.32467	3.84771	2.48341	2.02229	2.83579	T16H5.60	BOI-related E3 ubiquitin-protein ligase 1 [Cucumis sativus]	GO:0005634,GO:0046872,GO:0004842,GO:0042742,GO:0050832,GO:2000117,GO:0043069,GO:0043161,GO:0043067,GO:0009739	nucleus|metal ion binding|ubiquitin-protein transferase activity|defense response to bacterium|defense response to fungus|negative regulation of cysteine-type endopeptidase activity|negative regulation of programmed cell death|proteasome-mediated ubiquitin-dependent protein catabolic process|regulation of programmed cell death|response to gibberellin
Csa2G000640	98.8059	0.351768	3.35201	2.2644	1.17913	0.000802278	0.0282186	Up	2.32724	1.68532	2.95307	5.84246	3.53267	6.32021	F6F22.17	inositol oxygenase 2 [Cucumis sativus]	GO:0005737,GO:0050113,GO:0005506,GO:0019310,GO:0019853	cytoplasm|inositol oxygenase activity|iron ion binding|inositol catabolic process|L-ascorbic acid biosynthetic process	csv00053,csv00562	Ascorbate and aldarate metabolism|Inositol phosphate metabolism
Csa2G000960	585.101	0.205928	-5.11044	0.482171	-1.05238	3.21401e-07	3.26513e-05	Down	46.2428	39.1382	42.8095	21.7661	22.7745	16.1963		uncharacterized protein LOC101210555 [Cucumis sativus]
Csa2G005340	157.206	0.242239	8.25653	4.00016	2.00006	1.49963e-16	5.96697e-14	Up	4.1786	4.96842	5.51138	15.9248	20.7734	21.2683		hypothetical protein E6C27_scaffold41G001340 [Cucumis melo var. makuwa]
Csa2G009440	732.47	0.164438	-8.77637	0.367759	-1.44317	1.68834e-18	7.67752e-16	Down	35.7739	37.2553	29.1772	13.7509	11.5257	11.8253		uncharacterized protein LOC101209679 [Cucumis sativus]
Csa2G009450	620.51	0.248214	-5.75386	0.371598	-1.42819	8.72299e-09	1.15695e-06	Down	23.7932	18.831	19.1658	9.70924	5.18655	7.87049	F10N7.140	calcium uptake protein, mitochondrial [Cucumis sativus]	GO:0005743,GO:0005758,GO:0005739,GO:0005509,GO:0006816,GO:0051562	mitochondrial inner membrane|mitochondrial intermembrane space|mitochondrion|calcium ion binding|calcium ion transport|negative regulation of mitochondrial calcium ion concentration
Csa2G021560	560.193	0.276375	3.86556	2.09703	1.06834	0.000110833	0.0056448	Up	8.60189	12.3077	15.2472	21.5031	31.0201	21.9785	T12H1.17	E3 ubiquitin-protein ligase ATL6 [Cucumis sativus]	GO:0016021,GO:0005886,GO:0046872,GO:0004842,GO:0009816,GO:0009814,GO:0016567,GO:0010200	integral component of membrane|plasma membrane|metal ion binding|ubiquitin-protein transferase activity|defense response to bacterium, incompatible interaction|defense response, incompatible interaction|protein ubiquitination|response to chitin
Csa2G023900	343.551	0.251928	7.19492	3.51276	1.8126	6.2497e-13	1.51093e-10	Up	16.6236	15.1954	9.25625	42.6222	44.7875	55.6954	POTLX-3	LOW QUALITY PROTEIN: linoleate 9S-lipoxygenase 6 [Cucumis sativus]	GO:0005737,GO:0046872,GO:0016702,GO:0031408	cytoplasm|metal ion binding|oxidoreductase activity, acting on single donors with incorporation of molecular oxygen, incorporation of two atoms of oxygen|oxylipin biosynthetic process	csv00591	Linoleic acid metabolism
Csa2G023910	247.426	0.371564	4.59979	3.2696	1.70912	4.2291e-06	0.000335152	Up	44.5349	41.786	15.8525	104.648	113.287	111.894	LOXA	LOW QUALITY PROTEIN: linoleate 9S-lipoxygenase 6 [Cucumis sativus]	GO:0005737,GO:0046872,GO:0016702,GO:0031408	cytoplasm|metal ion binding|oxidoreductase activity, acting on single donors with incorporation of molecular oxygen, incorporation of two atoms of oxygen|oxylipin biosynthetic process	csv00591	Linoleic acid metabolism
Csa2G023920	130.422	0.360466	4.05638	2.75526	1.46219	4.98394e-05	0.00290208	Up	16.8333	13.0772	6.66901	32.7957	34.7139	31.9382	LOXB	LOW QUALITY PROTEIN: linoleate 9S-lipoxygenase 6 [Cucumis sativus]	GO:0005737,GO:0046872,GO:0016702,GO:0031408	cytoplasm|metal ion binding|oxidoreductase activity, acting on single donors with incorporation of molecular oxygen, incorporation of two atoms of oxygen|oxylipin biosynthetic process	csv00591	Linoleic acid metabolism
Csa2G030090	1845.66	0.32781	3.84494	2.39564	1.26041	0.000120581	0.00595085	Up	32.6162	36.2346	67.6542	90.3085	140.938	89.8595	Glyma15g16360	protein SRC2 [Cucumis sativus]	GO:0005789,GO:0016021,GO:0005886,GO:0032586	endoplasmic reticulum membrane|integral component of membrane|plasma membrane|protein storage vacuole membrane
Csa2G047790	162.148	0.246967	-4.08053	0.497319	-1.00776	4.49331e-05	0.0026818	Down	17.601	14.2834	12.8847	7.90735	7.7497	6.26953	F17I23.250	transcription factor IBH1-like 1 [Cucumis sativus]	GO:0005634,GO:0003677,GO:0003700,GO:0046983,GO:0009742,GO:0009740,GO:0040008	nucleus|DNA binding|DNA-binding transcription factor activity|protein dimerization activity|brassinosteroid mediated signaling pathway|gibberellic acid mediated signaling pathway|regulation of growth
Csa2G047810	144	0.279621	-12.6513	0.086116	-3.53757	1.10041e-36	1.10614e-33	Down	9.33647	9.82135	7.68537	0.650436	0.719032	0.920141	F17I23.260	RING-H2 finger protein ATL13 [Cucumis sativus]	GO:0016021,GO:0046872,GO:0016740,GO:0031625,GO:0016567,GO:0080167	integral component of membrane|metal ion binding|transferase activity|ubiquitin protein ligase binding|protein ubiquitination|response to karrikin
Csa2G058630	16.1985	0.586405	-3.29888	0.261615	-1.93448	0.000970707	0.0329299	Down	1.89028	2.21402	1.85409	0.54921	0.374528	0.624842		uncharacterized protein LOC105434720 [Cucumis sativus]
Csa2G070210	36.9789	0.437388	5.83368	5.86278	2.55158	5.42178e-09	7.55844e-07	Up	0.668505	0.434999	0.739947	3.12156	3.64248	3.91315		cytochrome P450 CYP73A100 [Cucumis sativus]	GO:0016021,GO:0020037,GO:0005506,GO:0004497,GO:0016705	integral component of membrane|heme binding|iron ion binding|monooxygenase activity|oxidoreductase activity, acting on paired donors, with incorporation or reduction of molecular oxygen	csv00130,csv00940,csv00941,csv00945	Ubiquinone and other terpenoid-quinone biosynthesis|Phenylpropanoid biosynthesis|Flavonoid biosynthesis|Stilbenoid, diarylheptanoid and gingerol biosynthesis
Csa2G079100	3837.82	0.151662	-7.13189	0.472493	-1.08164	9.89997e-13	2.33431e-10	Down	150.844	146.605	130.517	69.2764	71.5494	58.1525	F13O11.9	ammonium transporter 1 member 2 [Cucumis sativus]	GO:0005887,GO:0005886,GO:0008519,GO:0072488,GO:0015696,GO:0015843,GO:0009624	integral component of plasma membrane|plasma membrane|ammonium transmembrane transporter activity|ammonium transmembrane transport|ammonium transport|methylammonium transport|response to nematode
Csa2G122530	66.9477	0.39118	-3.5778	0.379044	-1.39956	0.000346496	0.0142011	Down	2.34382	2.09546	1.42879	0.694881	0.487805	1.03763		uncharacterized protein LOC105434579 [Cucumis sativus]
Csa2G238760	111.486	0.286016	-7.33314	0.233679	-2.0974	2.24821e-13	5.6498e-11	Down	5.73967	7.89407	7.04484	1.23757	1.55076	2.002	K13E13.2	RING-H2 finger protein ATL65 [Cucumis sativus]	GO:0016021,GO:0046872,GO:0016740,GO:0031625,GO:0016567	integral component of membrane|metal ion binding|transferase activity|ubiquitin protein ligase binding|protein ubiquitination
Csa2G248720	91.8701	0.316698	-5.21171	0.318522	-1.65053	1.87111e-07	1.97438e-05	Down	10.9199	9.16363	8.36781	3.52369	1.9789	3.50782		uncharacterized protein LOC105434603 [Cucumis sativus]
Csa2G258100	194.062	0.241272	-10.4688	0.173641	-2.52582	1.20211e-25	7.40618e-23	Down	21.8859	23.0708	23.3246	5.03115	3.33564	3.339	T4L20.340	auxin-responsive protein SAUR50 [Cucumis sativus]	GO:0009734,GO:0040008	auxin-activated signaling pathway|regulation of growth	csv04075	Plant hormone signal transduction
Csa2G258640	30.3694	0.532694	-3.56267	0.268349	-1.89782	0.000367097	0.0149492	Down	3.96958	6.19926	6.48931	2.23607	0.898868	1.28874	MRG7.3	auxin-responsive protein SAUR24 [Cucumis sativus]	GO:0005886,GO:0009734,GO:0007275,GO:0040008	plasma membrane|auxin-activated signaling pathway|multicellular organism development|regulation of growth	csv04075	Plant hormone signal transduction
Csa2G258720	44.6167	0.681009	3.18128	4.48927	2.16648	0.00146626	0.0450711	Up	2.31259	1.20923	0.590708	9.51303	2.45466	6.39878	MRG7.3	auxin-responsive protein SAUR24-like [Cucumis sativus]	GO:0005886,GO:0009734,GO:0007275,GO:0040008	plasma membrane|auxin-activated signaling pathway|multicellular organism development|regulation of growth
Csa2G277040	21.1639	0.63408	-3.28204	0.236338	-2.08108	0.00103059	0.0344716	Down	0.808511	2.04462	1.01382	0.34321	0.291261	0.265739		uncharacterized protein LOC101213140 [Cucumis sativus]
Csa2G277620	59.0824	0.365371	-3.94731	0.367998	-1.44223	7.90358e-05	0.00420475	Down	3.50538	4.58975	3.23211	1.72998	1.31284	1.05981		homeobox protein 6 [Cucumis sativus]
Csa2G295430	719.058	0.200825	-5.48936	0.465741	-1.1024	4.03388e-08	4.78529e-06	Down	26.7854	34.6124	42.2118	15.3975	14.4274	17.9955	O0929	uncharacterized protein LOC101208096 isoform X1 [Cucumis sativus]	GO:0071627,GO:0015174,GO:0034488	integral component of fungal-type vacuolar membrane|basic amino acid transmembrane transporter activity|basic amino acid transmembrane export from vacuole
Csa2G351550	121.904	0.256162	-4.79584	0.426757	-1.22851	1.61991e-06	0.000139363	Down	7.18413	6.07486	5.37797	2.76783	2.07876	3.04927	F1N21.16	F-box protein At1g67340 [Cucumis sativus]	GO:0005634,GO:0016567	nucleus|protein ubiquitination
Csa2G354750	26.4057	0.4397	-3.52336	0.341694	-1.54922	0.000426109	0.0168494	Down	1.30691	1.40318	1.23515	0.406838	0.453151	0.472507	MNL12.1	F-box/kelch-repeat protein At5g43190 [Cucumis sativus]	GO:0004842,GO:0031146	ubiquitin-protein transferase activity|SCF-dependent proteasomal ubiquitin-dependent protein catabolic process
Csa2G354820	992.366	0.287687	11.6099	10.1263	3.34003	3.66842e-31	2.80253e-28	Up	9.03013	10.2829	18.1031	109.816	146.116	117.236	T22C5.18	zinc finger protein ZAT10 [Cucumis sativus]	GO:0005634,GO:0003700,GO:0046872,GO:0043565,GO:0035264,GO:0045892,GO:0010117,GO:0015979,GO:0009737,GO:0010200,GO:0009409,GO:0009644,GO:0006979,GO:0009651,GO:0009414,GO:0009611	nucleus|DNA-binding transcription factor activity|metal ion binding|sequence-specific DNA binding|multicellular organism growth|negative regulation of transcription, DNA-templated|photoprotection|photosynthesis|response to abscisic acid|response to chitin|response to cold|response to high light intensity|response to oxidative stress|response to salt stress|response to water deprivation|response t…
Csa2G355030	581.657	0.14438	8.21059	2.27433	1.18544	2.20106e-16	7.9317e-14	Up	17.5242	14.9504	15.6048	38.7502	33.9344	35.3382	AP22.97	transcription factor MYB44 [Cucumis sativus]	GO:0005634,GO:0003700,GO:0043565,GO:0044212,GO:0019760,GO:1901001,GO:0010929,GO:0006355,GO:0009737,GO:0046686,GO:0010200,GO:0009723,GO:0009753,GO:0009751	nucleus|DNA-binding transcription factor activity|sequence-specific DNA binding|transcription regulatory region DNA binding|glucosinolate metabolic process|negative regulation of response to salt stress|positive regulation of auxin mediated signaling pathway|regulation of transcription, DNA-templated|response to abscisic acid|response to cadmium ion|response to chitin|response to ethylene|respons…
Csa2G360620	32.907	0.608617	4.44696	6.52733	2.70649	8.70955e-06	0.000639784	Up	0.540965	0.576013	0.200988	2.75565	1.60775	4.26727	F3A4.140	hypothetical protein Csa_022277 [Cucumis sativus]	GO:0005634,GO:0003700,GO:0043565,GO:0048527,GO:0010929,GO:0006355,GO:0010200,GO:0009723,GO:0009751	nucleus|DNA-binding transcription factor activity|sequence-specific DNA binding|lateral root development|positive regulation of auxin mediated signaling pathway|regulation of transcription, DNA-templated|response to chitin|response to ethylene|response to salicylic acid
Csa2G369020	3362.93	0.163651	14.212	5.01349	2.32581	7.71657e-46	1.22816e-42	Up	47.0847	43.6068	32.6103	197.744	208.516	204.019	PHI-1	protein PHOSPHATE-INDUCED 1 [Cucumis sativus]
Csa2G370580	162.697	0.215537	6.95411	2.82621	1.49887	3.54807e-12	7.78904e-10	Up	4.38363	4.75408	4.97651	12.6353	14.4222	12.243	K2I5.6	AT-hook motif nuclear-localized protein 17 [Cucumis sativus]	GO:0005634,GO:0003680,GO:0003700	nucleus|AT DNA binding|DNA-binding transcription factor activity
Csa2G371610	2165.8	0.290604	7.37927	4.42122	2.14444	1.59162e-13	4.16417e-11	Up	23.494	24.8453	37.4196	97.6967	170.139	104.201	F14M13.10	mitochondrial uncoupling protein 5 [Cucumis sativus]	GO:0016021,GO:0005743,GO:0015297,GO:0005310,GO:0015140,GO:0015131,GO:0017077,GO:0015141,GO:0015116,GO:0015117,GO:0071423,GO:0006839,GO:0015729,GO:0035435,GO:1902600,GO:0071422,GO:0008272,GO:0015709	integral component of membrane|mitochondrial inner membrane|antiporter activity|dicarboxylic acid transmembrane transporter activity|malate transmembrane transporter activity|oxaloacetate transmembrane transporter activity|oxidative phosphorylation uncoupler activity|succinate transmembrane transporter activity|sulfate transmembrane transporter activity|thiosulfate transmembrane transporter activ…
Csa2G372760	78.8384	0.265138	-4.05184	0.474903	-1.07429	5.08163e-05	0.00293214	Down	2.79029	2.85442	3.15245	1.19713	1.46187	1.46888	F19C14.5	protein DETOXIFICATION 48 [Cucumis sativus]	GO:0005794,GO:0000139,GO:0017119,GO:0016021,GO:0005770,GO:0031902,GO:0043226,GO:0015297,GO:0015238,GO:0005381,GO:0006855,GO:0015893,GO:0055072,GO:0006826,GO:1905428,GO:0009737,GO:0009646,GO:0009408,GO:0009624,GO:0006970,GO:0010015	Golgi apparatus|Golgi membrane|Golgi transport complex|integral component of membrane|late endosome|late endosome membrane|organelle|antiporter activity|drug transmembrane transporter activity|iron ion transmembrane transporter activity|drug transmembrane transport|drug transport|iron ion homeostasis|iron ion transport|regulation of plant organ formation|response to abscisic acid|response to abse…
Csa2G377370	686.906	0.218059	6.07079	2.50323	1.32379	1.27286e-09	1.99266e-07	Up	16.8922	14.6072	9.87742	35.842	31.5605	35.0054	At5g26220	gamma-glutamylcyclotransferase 2-1 [Cucumis sativus]	GO:0005737,GO:0003839,GO:0006751,GO:0046686,GO:0010288	cytoplasm|gamma-glutamylcyclotransferase activity|glutathione catabolic process|response to cadmium ion|response to lead ion	csv00480	Glutathione metabolism
Csa2G381800	87.8589	0.319019	5.04524	3.05152	1.60953	4.52962e-07	4.48245e-05	Up	1.09361	1.14749	1.39671	2.72352	4.36073	3.86918		uncharacterized protein LOC101207652 [Cucumis sativus]
Csa2G382470	12.3284	1.37151	5.17611	137.101	7.0991	2.26555e-07	2.36447e-05	Up	0	0	0	3.05258	2.91435	2.45444		PREDICTED: uncharacterized protein LOC103488565 [Cucumis melo]
Csa2G423690	27.9586	0.538801	5.27505	7.17114	2.8422	1.32718e-07	1.43208e-05	Up	0.915215	1.42928	1.49616	11.2062	8.52276	7.37416		hypothetical protein Csa_021836 [Cucumis sativus]			csv00860	Porphyrin metabolism
Csa3G011620	1997.56	0.121637	10.1339	2.35	1.23266	3.90791e-24	2.26173e-21	Up	31.128	28.2857	27.8775	65.6161	71.3947	65.3453	Solyc08g076930	transcription factor MYC2 [Cucumis sativus]			csv04016,csv04075	MAPK signaling pathway - plant|Plant hormone signal transduction
Csa3G017320	529.96	0.353719	5.62403	3.97052	1.98933	1.8655e-08	2.35955e-06	Up	5.54297	8.3573	15.5628	37.5965	41.1175	36.6359	dl4785w	hypothetical protein Csa_011730 [Cucumis sativus]	GO:0005634,GO:0003677,GO:0003700,GO:0051301,GO:0006952,GO:0009873,GO:0010087,GO:0010200	nucleus|DNA binding|DNA-binding transcription factor activity|cell division|defense response|ethylene-activated signaling pathway|phloem or xylem histogenesis|response to chitin
Csa3G018320	695.312	0.244046	13.1488	9.24647	3.2089	1.72983e-39	2.06487e-36	Up	4.74082	4.91912	8.11664	51.4094	58.9824	51.6191	dl4780c	ethylene-responsive transcription factor 6 [Cucumis sativus]	GO:0005634,GO:0003677,GO:0003700,GO:0051301,GO:0006952,GO:0009873,GO:0010087,GO:0010200,GO:0009644,GO:0000302	nucleus|DNA binding|DNA-binding transcription factor activity|cell division|defense response|ethylene-activated signaling pathway|phloem or xylem histogenesis|response to chitin|response to high light intensity|response to reactive oxygen species
Csa3G073900	661.672	0.201843	-5.97925	0.433207	-1.20687	2.24165e-09	3.26819e-07	Down	46.112	44.0835	50.9338	16.0357	24.3966	19.8257	ERF-5	hypothetical protein Csa_010710 [Cucumis sativus]	GO:0005634,GO:0003677,GO:0003700,GO:0006952,GO:0009873	nucleus|DNA binding|DNA-binding transcription factor activity|defense response|ethylene-activated signaling pathway
Csa3G081900	461.421	0.562926	4.16437	5.07791	2.34423	3.12207e-05	0.00198762	Up	4.25039	8.21746	25.5552	46.3946	84.1337	59.5263	M4I22.90	calcium-binding protein KRP1 [Cucumis sativus]	GO:0005509,GO:0080167	calcium ion binding|response to karrikin
Csa3G119700	3250.77	0.370431	6.56174	5.39145	2.43067	5.31839e-11	9.95843e-09	Up	26.7761	29.3926	62.0394	148.131	289.272	189.11	F2P3.16	probable WRKY transcription factor 46 [Cucumis sativus]	GO:0005634,GO:0003700,GO:0043565,GO:0044212	nucleus|DNA-binding transcription factor activity|sequence-specific DNA binding|transcription regulatory region DNA binding
Csa3G120440	102.333	0.250053	-6.74865	0.310461	-1.68752	1.49231e-11	2.90832e-09	Down	4.10977	4.06313	4.52413	1.18307	1.4447	1.25991	F17K4_200	pentatricopeptide repeat-containing protein At5g18950 isoform X1 [Cucumis sativus]
Csa3G123180	117.117	0.791629	4.56249	12.2253	3.6118	5.05502e-06	0.000392463	Up	0.603926	0.825252	1.85114	2.06801	24.8889	12.2898	F4I18.26	BON1-associated protein 2 [Cucumis sativus]	GO:0016020,GO:0006952	membrane|defense response
Csa3G127110	183.951	0.3322	-3.6919	0.427368	-1.22645	0.000222584	0.00981787	Down	5.58669	5.97134	3.99966	1.59215	3.04011	1.88979	T6D22.15	PREDICTED: pentatricopeptide repeat-containing protein At1g08070, chloroplastic-like [Cucumis melo]
Csa3G127170	304.372	0.308258	3.82102	2.26241	1.17786	0.000132902	0.00636164	Up	4.4771	4.48962	2.73626	10.7551	5.75175	9.7775	F5D14.23	protein NRT1/ PTR FAMILY 7.3 [Cucumis sativus]	GO:0016021,GO:0005886,GO:0015112,GO:0015386,GO:0015293,GO:0010150,GO:0015706,GO:0055075,GO:1902600,GO:0010167	integral component of membrane|plasma membrane|nitrate transmembrane transporter activity|potassium:proton antiporter activity|symporter activity|leaf senescence|nitrate transport|potassium ion homeostasis|proton transmembrane transport|response to nitrate
Csa3G128830	69.1973	0.331198	-3.75064	0.422727	-1.2422	0.000176385	0.00802092	Down	4.6408	3.31916	3.96497	1.45297	2.02132	1.48776		uncharacterized protein LOC105435079 [Cucumis sativus]
Csa3G128900	85.6733	0.350667	-3.957	0.382203	-1.38759	7.58977e-05	0.00406042	Down	5.46253	3.97457	3.14577	1.752	1.14791	1.88091	F27H5_10	E3 ubiquitin-protein ligase ATL4 [Cucumis sativus]	GO:0016021,GO:0046872,GO:0031625,GO:0004842,GO:0016567	integral component of membrane|metal ion binding|ubiquitin protein ligase binding|ubiquitin-protein transferase activity|protein ubiquitination
Csa3G132580	276.448	0.236229	4.52789	2.09888	1.06962	5.95745e-06	0.000449728	Up	6.41986	5.36639	6.22294	9.59956	14.9704	12.7191	K24G6.19	protein SULFUR DEFICIENCY-INDUCED 1 [Cucumis sativus]	GO:0090568,GO:0010438,GO:0010439,GO:0006792	nuclear transcriptional repressor complex|cellular response to sulfur starvation|regulation of glucosinolate biosynthetic process|regulation of sulfur utilization
Csa3G135120	311.127	0.338292	4.62266	2.95633	1.56381	3.78852e-06	0.000304021	Up	7.91191	7.66069	14.9388	22.9219	37.0585	28.8993	K14B15.15	ethylene-response factor C3 [Cucumis sativus]	GO:0005634,GO:0003677,GO:0003700,GO:0006952,GO:0009873,GO:0009867	nucleus|DNA binding|DNA-binding transcription factor activity|defense response|ethylene-activated signaling pathway|jasmonic acid mediated signaling pathway	csv04016,csv04075	MAPK signaling pathway - plant|Plant hormone signal transduction
Csa3G141880	151.324	0.205159	-6.07511	0.421509	-1.24637	1.23904e-09	1.95573e-07	Down	5.34915	5.47701	6.29587	2.25833	2.20802	2.68154	dl3280c	serine/threonine-protein kinase BLUS1 [Cucumis sativus]	GO:0005737,GO:0005829,GO:0005524,GO:0046872,GO:0004674,GO:0032147,GO:1902456,GO:0023014,GO:0031098	cytoplasm|cytosol|ATP binding|metal ion binding|protein serine/threonine kinase activity|activation of protein kinase activity|regulation of stomatal opening|signal transduction by protein phosphorylation|stress-activated protein kinase signaling cascade
Csa3G143540	280.667	0.254939	7.48948	3.75644	1.90936	6.91447e-14	1.85999e-11	Up	4.1737	4.78901	2.57164	15.0424	13.4774	14.2835	dl3300w	DNA-directed RNA polymerase V subunit 7 [Cucumis sativus]	GO:0005634,GO:0003899,GO:0003697,GO:0003727	nucleus|DNA-directed 5'-3' RNA polymerase activity|single-stranded DNA binding|single-stranded RNA binding	csv03020	RNA polymerase
Csa3G149380	116.398	0.3575	-5.55394	0.252519	-1.98553	2.79306e-08	3.46394e-06	Down	6.53405	6.69648	7.45486	2.48604	0.970964	1.72489	F7K24.10	protein FANTASTIC FOUR 3 [Cucumis sativus]
Csa3G150000	773.289	0.180082	5.6412	2.02214	1.01588	1.68865e-08	2.16453e-06	Up	12.8194	13.1291	15.3571	32.477	22.818	27.3003	Niben101Scf03191g04002	probable aspartic proteinase GIP2 [Cucumis sativus]
Csa3G164500	294.144	0.335691	4.51183	2.85716	1.51458	6.42703e-06	0.000481372	Up	5.40041	4.34564	9.51913	14.8864	21.5226	17.8854	MGL6.19	RING-H2 finger protein ATL2 [Cucumis sativus]	GO:0016021,GO:0046872,GO:0016740,GO:0006952,GO:0016567,GO:0010200	integral component of membrane|metal ion binding|transferase activity|defense response|protein ubiquitination|response to chitin
Csa3G171230	66.2852	0.354964	-4.05337	0.368874	-1.4388	5.04859e-05	0.00292191	Down	9.6066	8.08063	5.50614	3.1607	2.55333	2.74308		uncharacterized protein LOC101206709 [Cucumis sativus]
Csa3G172370	13968.1	0.301465	3.61023	2.12632	1.08836	0.000305924	0.0128414	Up	636.06	510.392	297.302	1107.67	683.875	1265	F15H11.12	MLP-like protein 43 [Cucumis sativus]	GO:0009507,GO:0006952	chloroplast|defense response
Csa3G175640	173.595	0.226492	-5.43562	0.425985	-1.23113	5.46051e-08	6.20776e-06	Down	25.6317	24.8146	27.3595	8.32505	12.0769	12.3775		hypothetical protein Csa_009618 [Cucumis sativus]
Csa3G180210	16.7086	0.613248	3.80366	5.03706	2.33258	0.000142576	0.00674026	Up	0.503004	0.306851	0.256966	1.69633	1.61951	2.01344	MSG15.7	LOW QUALITY PROTEIN: sorbitol dehydrogenase [Cucumis sativus]	GO:0005737,GO:0005829,GO:0031966,GO:0005886,GO:0009506,GO:0003939,GO:0008270	cytoplasm|cytosol|mitochondrial membrane|plasma membrane|plasmodesma|L-iditol 2-dehydrogenase activity|zinc ion binding	csv00040,csv00051	Pentose and glucuronate interconversions|Fructose and mannose metabolism
Csa3G180260	407.185	0.706339	12.3186	416.189	8.70109	7.19474e-35	6.24602e-32	Up	0.0510314	0.149429	0.10428	27.4827	64.2558	32.6304	M7J2.150	dehydration-responsive element-binding protein 1A [Cucumis sativus]	GO:0005634,GO:0003677,GO:0003700,GO:0009631,GO:0009409,GO:0009414	nucleus|DNA binding|DNA-binding transcription factor activity|cold acclimation|response to cold|response to water deprivation
Csa3G217160	43.3868	0.381041	3.50183	2.5216	1.33434	0.000462083	0.0178574	Up	1.08362	1.49837	0.830366	2.71735	2.63903	3.17152		uncharacterized protein LOC101221335 precursor [Cucumis sativus]	GO:0030246,GO:0030598,GO:0090729,GO:0006952,GO:0017148	carbohydrate binding|rRNA N-glycosylase activity|toxin activity|defense response|negative regulation of translation
Csa3G278920	104.392	0.557407	3.83644	4.40292	2.13846	0.000124829	0.00606644	Up	0.879674	0.981271	1.86177	2.0864	8.24782	5.80913	F16B3.18	LOB domain-containing protein 41 [Cucumis sativus]	GO:0006355	regulation of transcription, DNA-templated
Csa3G357110	31.5383	0.582173	-3.24705	0.269743	-1.89034	0.00116609	0.0380992	Down	1.97338	2.06371	3.12039	0.243774	0.930939	0.728027	T13J8.60	ethylene-responsive transcription factor CRF4 [Cucumis sativus]	GO:0005737,GO:0005634,GO:0003677,GO:0003700,GO:0009736,GO:0009873,GO:0048366	cytoplasm|nucleus|DNA binding|DNA-binding transcription factor activity|cytokinin-activated signaling pathway|ethylene-activated signaling pathway|leaf development
Csa3G405510	676.765	0.425081	3.3715	2.70038	1.43316	0.000747593	0.0265396	Up	7.07039	6.12499	10.8909	10.7708	34.5963	18.3811	OsJ_24639	scarecrow-like protein 21 [Cucumis sativus]	GO:0005634,GO:0003700,GO:0043565	nucleus|DNA-binding transcription factor activity|sequence-specific DNA binding
Csa3G405520	21.1405	0.910966	3.21199	7.60007	2.92601	0.00131819	0.0418905	Up	0.284734	0.555833	1.30914	1.77274	10.0137	4.11776		hypothetical protein Csa_010607, partial [Cucumis sativus]
Csa3G457670	42.4153	0.460226	-3.5014	0.327272	-1.61144	0.000462821	0.0178574	Down	3.89136	3.52027	1.89097	1.23107	0.846232	0.931399	F26P21.10	GATA transcription factor 4 [Cucumis sativus]	GO:0005634,GO:0003700,GO:0043565,GO:0008270,GO:0007623,GO:0045893,GO:0009416	nucleus|DNA-binding transcription factor activity|sequence-specific DNA binding|zinc ion binding|circadian rhythm|positive regulation of transcription, DNA-templated|response to light stimulus
Csa3G462680	50.7827	0.458158	4.35024	3.98091	1.9931	1.3599e-05	0.00094446	Up	0.823467	1.83714	1.02165	4.08929	3.78757	6.74428		uncharacterized protein LOC105434903 [Cucumis sativus]
Csa3G483770	474.598	0.373266	6.48081	5.34826	2.41907	9.1232e-11	1.64381e-08	Up	5.23985	5.69889	11.9311	29.4125	52.4535	38.559		hypothetical protein Csa_023408 [Cucumis sativus]
Csa3G642710	44.646	0.399588	5.42185	4.48935	2.16651	5.89869e-08	6.66622e-06	Up	0.930789	1.21134	0.951009	5.27993	4.61052	3.78187		uncharacterized protein LOC101222094 [Cucumis sativus]
Csa3G645940	655.064	0.225463	9.23544	4.23466	2.08225	2.57236e-20	1.32782e-17	Up	10.632	9.39922	13.4006	41.2809	55.8583	42.1753	OsJ_11194	protein TIFY 10a [Cucumis sativus]	GO:0031347,GO:2000022,GO:0009611	regulation of defense response|regulation of jasmonic acid mediated signaling pathway|response to wounding	csv04075	Plant hormone signal transduction
Csa3G684690	431.562	0.242552	-6.39257	0.341384	-1.55053	1.63116e-10	2.83214e-08	Down	20.85	22.1524	24.446	5.60387	9.7521	7.30872	F4F15.80	hypothetical protein Csa_002202 [Cucumis sativus]	GO:0016021,GO:0008374,GO:0016127,GO:0034434	integral component of membrane|O-acyltransferase activity|sterol catabolic process|sterol esterification
Csa3G706170	213.311	0.755996	4.85414	12.726	3.66971	1.20908e-06	0.000107907	Up	2.13211	1.34657	8.45744	17.8294	96.7894	33.2958		hypothetical protein Csa_001555 [Cucumis sativus]
Csa3G710870	2905.21	0.344285	14.6359	32.8753	5.03893	1.6575e-48	2.87787e-45	Up	4.83053	3.56983	9.72991	167.702	230.933	189.223	F23A5.19	probable WRKY transcription factor 40 [Cucumis sativus]	GO:0005634,GO:0003700,GO:0043565,GO:0044212,GO:0042742,GO:0050832,GO:0045892,GO:0031347,GO:0010200,GO:0002237,GO:0009751,GO:0009611	nucleus|DNA-binding transcription factor activity|sequence-specific DNA binding|transcription regulatory region DNA binding|defense response to bacterium|defense response to fungus|negative regulation of transcription, DNA-templated|regulation of defense response|response to chitin|response to molecule of bacterial origin|response to salicylic acid|response to wounding
Csa3G728070	7.6185	1.48262	3.65037	42.58	5.4121	0.000261863	0.0112897	Up	0	0.103519	0	1.65079	2.10138	0.986013		hypothetical protein Csa_002168 [Cucumis sativus]
Csa3G731120	129.878	0.263554	-3.85038	0.494903	-1.01478	0.000117935	0.00586574	Down	5.08671	6.1234	6.86032	2.7447	3.46029	2.59222		uncharacterized protein LOC101211240 [Cucumis sativus]
Csa3G735030	594.381	0.315573	-4.52807	0.371405	-1.42893	5.95249e-06	0.000449728	Down	14.6267	17.5149	29.9366	6.93412	9.28207	6.44431	T26I12.30	exocyst complex component EXO70H1 [Cucumis sativus]	GO:0005829,GO:0012505,GO:0000145,GO:0016020,GO:0005634,GO:0045335,GO:0031982,GO:0006952,GO:0006887,GO:1900426,GO:0009617,GO:0009620,GO:0002237	cytosol|endomembrane system|exocyst|membrane|nucleus|phagocytic vesicle|vesicle|defense response|exocytosis|positive regulation of defense response to bacterium|response to bacterium|response to fungus|response to molecule of bacterial origin
Csa3G769110	2080.47	0.188735	-5.5491	0.48387	-1.04731	2.87142e-08	3.53814e-06	Down	92.2747	92.8562	118.336	46.4829	55.7086	42.2625	F14J16.18	serine acetyltransferase 1, chloroplastic [Cucumis sativus]	GO:0009507,GO:0005829,GO:0005634,GO:0009001,GO:0009970,GO:0006535,GO:0009409	chloroplast|cytosol|nucleus|serine O-acetyltransferase activity|cellular response to sulfate starvation|cysteine biosynthetic process from serine|response to cold	csv00270,csv00920	Cysteine and methionine metabolism|Sulfur metabolism
Csa3G799120	421.29	0.191926	-6.36345	0.428892	-1.22131	1.97272e-10	3.33424e-08	Down	24.6683	24.7051	23.2749	10.339	11.7415	8.54934	T6D20.16	zinc finger protein 8 [Cucumis sativus]	GO:0005634,GO:0003700,GO:0046872,GO:0044212,GO:0009738,GO:0009736,GO:0009740,GO:0007275,GO:0009788,GO:0006355,GO:0010026	nucleus|DNA-binding transcription factor activity|metal ion binding|transcription regulatory region DNA binding|abscisic acid-activated signaling pathway|cytokinin-activated signaling pathway|gibberellic acid mediated signaling pathway|multicellular organism development|negative regulation of abscisic acid-activated signaling pathway|regulation of transcription, DNA-templated|trichome differentia…
Csa3G816710	613.532	0.230177	5.53839	2.41968	1.27481	3.05257e-08	3.73725e-06	Up	19.0796	17.3169	27.577	51.3665	55.3218	45.7873	At2g41010	calmodulin-binding protein 25 [Cucumis sativus]	GO:0005634,GO:0005516,GO:0010337,GO:0009651,GO:0009414	nucleus|calmodulin binding|regulation of salicylic acid metabolic process|response to salt stress|response to water deprivation
Csa3G822330	312.825	0.193035	7.83226	2.85186	1.5119	4.79192e-15	1.50034e-12	Up	3.85819	5.23603	4.077	11.8733	10.8645	14.5223	OsJ_21154	beta-glucosidase 24 [Cucumis sativus]	GO:0008422,GO:0102483,GO:0005975	beta-glucosidase activity|scopolin beta-glucosidase activity|carbohydrate metabolic process	csv00460,csv00500,csv00999	Cyanoamino acid metabolism|Starch and sucrose metabolism|Biosynthesis of various plant secondary metabolites
Csa3G823060	2329.64	0.191274	6.14551	2.25868	1.17548	7.97062e-10	1.30112e-07	Up	58.3913	59.1192	85.607	146.186	160.363	146.102	F13H10.4	probable calcium-binding protein CML35 [Cucumis sativus]	GO:0005886,GO:0005509	plasma membrane|calcium ion binding	csv04626	Plant-pathogen interaction
Csa3G837560	4.36886	1.6709	3.35342	48.6116	5.60323	0.000798183	0.0281264	Up	0	0	0	0.300746	0.410182	0.384932		hypothetical protein Csa_002140 [Cucumis sativus]
Csa3G872740	861.342	0.149381	22.4275	10.1981	3.35023	2.12351e-111	1.3519e-107	Up	5.47153	5.34052	5.84286	56.1531	58.6461	52.6184	T19F6.2	pathogenesis-related thaumatin-like protein 3.5 [Cucumis sativus]	GO:0006952,GO:0009617,GO:0009723	defense response|response to bacterium|response to ethylene
Csa3G878200	1204.89	0.110357	-9.5832	0.480441	-1.05757	9.4087e-22	4.99157e-19	Down	25.9782	26.6832	28.1301	12.8988	12.9561	12.4562	F18G18.90	EIN3-binding F-box protein 1-like [Cucumis sativus]	GO:0005634,GO:0019005,GO:0009873,GO:0010105,GO:0016567,GO:0009723,GO:0031146,GO:0006511	nucleus|SCF ubiquitin ligase complex|ethylene-activated signaling pathway|negative regulation of ethylene-activated signaling pathway|protein ubiquitination|response to ethylene|SCF-dependent proteasomal ubiquitin-dependent protein catabolic process|ubiquitin-dependent protein catabolic process	csv04016,csv04075	MAPK signaling pathway - plant|Plant hormone signal transduction
Csa3G878830	18.1917	0.682277	3.20191	4.54598	2.18459	0.00136518	0.042884	Up	0.196919	0.192204	0.603589	1.32817	1.21926	1.93243	T6K22.80	U-box domain-containing protein 8 [Cucumis sativus]	GO:0005737,GO:0005634,GO:0004842,GO:0016567	cytoplasm|nucleus|ubiquitin-protein transferase activity|protein ubiquitination
Csa3G881780	68.6517	0.279624	-4.40318	0.425952	-1.23124	1.06674e-05	0.000760209	Down	1.63657	1.85228	1.65433	0.740703	0.620922	0.809305	T6B12.2	receptor-like protein 7 [Cucumis sativus]	GO:0016021,GO:0005886	integral component of membrane|plasma membrane
Csa3G889770	986.852	0.239466	17.3267	17.7428	4.14916	2.9583e-67	9.41677e-64	Up	7.64972	4.32275	4.2679	96.037	91.8377	97.1121	PHI-1	protein PHOSPHATE-INDUCED 1 [Cucumis sativus]
Csa3G895650	62.8739	0.392635	-4.09098	0.328448	-1.60626	4.29547e-05	0.00257176	Down	4.15112	4.46827	2.65577	0.966157	0.999274	1.72324	F26P21.10	GATA transcription factor 9 [Cucumis sativus]	GO:0005634,GO:0003700,GO:0043565,GO:0008270,GO:0007623,GO:0045893,GO:0009416	nucleus|DNA-binding transcription factor activity|sequence-specific DNA binding|zinc ion binding|circadian rhythm|positive regulation of transcription, DNA-templated|response to light stimulus
Csa4G000960	75.7148	0.304894	-4.14575	0.416384	-1.26401	3.38704e-05	0.00211402	Down	3.32539	3.46771	2.52644	1.29767	1.40785	1.11567		Transcriptional coactivator Hfi1/Transcriptional adapter 1 [Cucumis melo var. makuwa]
Csa4G001970	123.392	0.368686	6.78893	5.66858	2.50299	1.12965e-11	2.29523e-09	Up	1.33679	2.32996	1.75606	10.1558	6.52698	14.0061	T30B22.18	ethylene-responsive transcription factor ERF073 [Cucumis sativus]	GO:0005634,GO:0003677,GO:0003700,GO:0009873,GO:2000280,GO:0034059	nucleus|DNA binding|DNA-binding transcription factor activity|ethylene-activated signaling pathway|regulation of root development|response to anoxia
Csa4G004870	179.725	0.202315	-6.34552	0.410714	-1.2838	2.21669e-10	3.68144e-08	Down	20.4534	18.1812	18.4348	6.8219	8.53925	7.77213	F18B13.26	MAPK kinase substrate protein At1g80180 [Cucumis sativus]	GO:0005886,GO:0010375	plasma membrane|stomatal complex patterning
Csa4G006310	69.4985	0.419994	-4.24792	0.290357	-1.7841	2.15762e-05	0.00142098	Down	7.50345	7.10186	4.1817	2.24143	1.06997	2.1139		uncharacterized protein LOC101211300 [Cucumis sativus]
Csa4G023020	366.175	0.184571	10.9569	4.0624	2.02233	6.15439e-28	4.05319e-25	Up	9.35521	10.5503	8.13759	36.0752	40.7037	35.521	MBK20.1	ethylene-responsive transcription factor ERF106 [Cucumis sativus]	GO:0005634,GO:0003677,GO:0003700,GO:0009873	nucleus|DNA binding|DNA-binding transcription factor activity|ethylene-activated signaling pathway
Csa4G052070	366.792	0.260507	-6.03156	0.336513	-1.57126	1.6238e-09	2.46135e-07	Down	40.6356	38.4543	43.4529	11.7883	18.036	10.6068		hypothetical protein Csa_015211 [Cucumis sativus]
Csa4G056600	281.515	0.215255	9.15099	3.91712	1.96979	5.64167e-20	2.76283e-17	Up	4.43722	4.07047	3.20421	17.3787	13.1214	14.8536	Solyc08g005610.2.1	abscisic acid 8'-hydroxylase CYP707A2 [Cucumis sativus]	GO:0020037,GO:0005506,GO:0004497,GO:0016705,GO:0009687,GO:0055114,GO:0016125	heme binding|iron ion binding|monooxygenase activity|oxidoreductase activity, acting on paired donors, with incorporation or reduction of molecular oxygen|abscisic acid metabolic process|oxidation-reduction process|sterol metabolic process	csv00906	Carotenoid biosynthesis
Csa4G151760	65.8743	0.391574	3.45288	2.55276	1.35206	0.000554627	0.0206891	Up	2.65164	3.29401	3.20184	5.9199	5.73143	11.7035		hypothetical protein Csa_014847 [Cucumis sativus]
Csa4G165910	40.0197	0.458776	5.63005	5.99155	2.58293	1.80158e-08	2.29389e-06	Up	1.01299	0.461412	0.897001	5.18564	4.68321	4.11588		uncharacterized protein LOC101216264 [Cucumis sativus]
Csa4G214830	1369.02	0.187611	14.8209	6.87123	2.78057	1.07334e-49	2.27775e-46	Up	12.4062	12.179	13.5524	75.1258	103.637	79.1086	F13H10.2	protein EARLY RESPONSIVE TO DEHYDRATION 15-like [Cucumis sativus]	GO:0005737,GO:0009617,GO:0009644,GO:0009414	cytoplasm|response to bacterium|response to high light intensity|response to water deprivation
Csa4G293330	26.668	0.614524	3.9019	5.27002	2.39781	9.54413e-05	0.00499406	Up	0.438288	0.499093	0.970254	2.27397	4.77619	2.79193	F3G5.22	zinc finger protein ZAT11 [Cucumis sativus]	GO:0005634,GO:0003700,GO:0046872,GO:0003676,GO:0071289,GO:2000280,GO:0006355,GO:0010200	nucleus|DNA-binding transcription factor activity|metal ion binding|nucleic acid binding|cellular response to nickel ion|regulation of root development|regulation of transcription, DNA-templated|response to chitin
Csa4G296260	1122.31	0.339992	8.31651	7.09864	2.82754	9.05934e-17	3.7614e-14	Up	5.66937	7.59752	12.7749	51.3558	80.5736	49.3835	F23M19.3	uncharacterized protein LOC101204955 [Cucumis sativus]
Csa4G296840	47.9896	0.374911	3.47268	2.46561	1.30195	0.000515287	0.0195267	Up	1.29612	1.3624	1.57895	3.15542	2.61745	4.63457	F13M22	NADPH-dependent aldo-keto reductase, chloroplastic [Cucumis sativus]	GO:0009507,GO:0008106,GO:0004032,GO:0004033,GO:0070401,GO:0016491,GO:0016229,GO:0055114,GO:0009409,GO:0009651,GO:0009636,GO:0009414	chloroplast|alcohol dehydrogenase (NADP+) activity|alditol:NADP+ 1-oxidoreductase activity|aldo-keto reductase (NADP) activity|NADP+ binding|oxidoreductase activity|steroid dehydrogenase activity|oxidation-reduction process|response to cold|response to salt stress|response to toxic substance|response to water deprivation	csv00010,csv00040,csv00053,csv00561,csv00620	Glycolysis / Gluconeogenesis|Pentose and glucuronate interconversions|Ascorbate and aldarate metabolism|Glycerolipid metabolism|Pyruvate metabolism
Csa4G303070	16.5905	0.860775	4.38128	13.6544	3.77129	1.17985e-05	0.000831512	Up	0	0.607258	0.254268	3.22792	4.43772	3.9846		hypothetical protein Csa_017945 [Cucumis sativus]
Csa4G308490	81.5455	0.28427	-4.70625	0.39561	-1.33785	2.52314e-06	0.000209519	Down	3.26312	2.82248	3.41533	1.26631	1.36666	1.06878	MRO11.2	BAHD acyltransferase DCR [Cucumis sativus]	GO:0005737,GO:0005829,GO:0016747,GO:0010143,GO:0051179,GO:0090626,GO:0010090	cytoplasm|cytosol|transferase activity, transferring acyl groups other than amino-acyl groups|cutin biosynthetic process|localization|plant epidermis morphogenesis|trichome morphogenesis
Csa4G308620	32.9406	0.625852	4.13841	6.02113	2.59003	3.49717e-05	0.00216858	Up	0.245638	1.35862	0.752923	5.18273	5.19139	3.55237		hypothetical protein Csa_017974 [Cucumis sativus]
Csa4G314400	147.631	0.235569	-4.58761	0.4728	-1.0807	4.48347e-06	0.000353842	Down	57.1771	56.6494	62.8227	30.1124	20.4942	32.3512		hypothetical protein Csa_021555 [Cucumis sativus]
Csa4G331590	810.263	0.176671	-11.9982	0.23009	-2.11973	3.63149e-33	3.01556e-30	Down	34.8254	34.4535	43.1477	9.30141	8.60443	7.59166	T20L15.90	CBL-interacting serine/threonine-protein kinase 14 [Cucumis sativus]	GO:0005737,GO:0005634,GO:0009506,GO:0005773,GO:0005524,GO:0019900,GO:0004674,GO:0009737,GO:0009409,GO:0009749,GO:0009408,GO:0006979,GO:0009651,GO:0009414,GO:0007165	cytoplasm|nucleus|plasmodesma|vacuole|ATP binding|kinase binding|protein serine/threonine kinase activity|response to abscisic acid|response to cold|response to glucose|response to heat|response to oxidative stress|response to salt stress|response to water deprivation|signal transduction
Csa4G332100	104.874	0.228882	-4.44532	0.493988	-1.01745	8.77631e-06	0.000642217	Down	5.05169	5.76517	5.91579	2.74193	2.65627	2.76973	T20L15.110	transcription repressor OFP1 [Cucumis sativus]	GO:0005856,GO:0005730,GO:0003677,GO:0006281,GO:0045892,GO:0051510	cytoskeleton|nucleolus|DNA binding|DNA repair|negative regulation of transcription, DNA-templated|regulation of unidimensional cell growth
Csa4G370550	76.1153	0.551766	3.84401	4.34993	2.12099	0.000121041	0.00595816	Up	2.26543	2.04939	0.508091	6.82287	4.59806	9.53184	T26F17.14	ethylene-responsive transcription factor ERF014 [Cucumis sativus]	GO:0005634,GO:0003700,GO:0043565,GO:0044212,GO:0071497,GO:0034605,GO:0009873,GO:0045893,GO:0009753,GO:0009751	nucleus|DNA-binding transcription factor activity|sequence-specific DNA binding|transcription regulatory region DNA binding|cellular response to freezing|cellular response to heat|ethylene-activated signaling pathway|positive regulation of transcription, DNA-templated|response to jasmonic acid|response to salicylic acid
Csa4G500830	15940.5	0.406367	4.11887	3.19048	1.67377	3.80738e-05	0.00233067	Up	683.812	519.389	176.539	1580.69	1100.3	1689.41		protein PHLOEM PROTEIN 2-LIKE A1-like isoform X2 [Cucumis sativus]
Csa4G501830	714.335	0.275092	8.24012	4.81251	2.26679	1.72041e-16	6.57164e-14	Up	13.0499	22.9519	11.5942	73.2669	63.6412	90.2595		hypothetical protein Csa_012122, partial [Cucumis sativus]
Csa4G502330	133.191	0.410184	5.46802	4.73346	2.2429	4.55094e-08	5.2999e-06	Up	6.41834	10.9632	3.42792	27.8511	31.0697	38.7255		hypothetical protein Csa_012122, partial [Cucumis sativus]
Csa4G618430	669.971	0.32956	4.07376	2.53599	1.34255	4.62596e-05	0.00275238	Up	13.2337	11.1352	5.10283	27.1222	23.1564	23.4646	GABA-T3	gamma aminobutyrate transaminase 2 [Cucumis sativus]	GO:0009507,GO:0034387,GO:0004015,GO:0102351,GO:0030170,GO:0009102	chloroplast|4-aminobutyrate:pyruvate transaminase activity|adenosylmethionine-8-amino-7-oxononanoate transaminase activity|gamma-aminobutyrate transaminase (glyoxylate dependent) activity|pyridoxal phosphate binding|biotin biosynthetic process	csv00250,csv00650	Alanine, aspartate and glutamate metabolism|Butanoate metabolism
Csa4G627100	33.6867	0.652346	3.37708	4.60445	2.20303	0.000732589	0.0260892	Up	0.463388	0.521877	0.327776	3.10696	2.01282	0.773241	T30F21.1	gamma-glutamyl hydrolase 2 [Cucumis sativus]	GO:0005618,GO:0005615,GO:0005773,GO:0034722,GO:0008242,GO:0046900	cell wall|extracellular space|vacuole|gamma-glutamyl-peptidase activity|omega peptidase activity|tetrahydrofolylpolyglutamate metabolic process	csv00790	Folate biosynthesis
Csa4G630010	454.211	0.217696	14.72	9.21827	3.2045	4.7954e-49	9.15874e-46	Up	5.84861	6.5145	6.39748	53.049	67.4154	49.5406	K7L4.1	ethylene-responsive transcription factor 4 [Cucumis sativus]	GO:0016604,GO:0005634,GO:0003700,GO:0043565,GO:0009873,GO:0009864,GO:0010105,GO:0045892,GO:0009737,GO:0010200,GO:0009723	nuclear body|nucleus|DNA-binding transcription factor activity|sequence-specific DNA binding|ethylene-activated signaling pathway|induced systemic resistance, jasmonic acid mediated signaling pathway|negative regulation of ethylene-activated signaling pathway|negative regulation of transcription, DNA-templated|response to abscisic acid|response to chitin|response to ethylene
Csa4G637750	365.8	0.142728	12.9289	3.59334	1.84533	3.09027e-38	3.47183e-35	Up	6.63877	6.55933	6.69976	22.7372	21.7883	26.2951	F27G19.70	E3 ubiquitin-protein ligase RMA3 [Cucumis sativus]	GO:0036513,GO:0005783,GO:0016021,GO:0046872,GO:0061630,GO:0044390,GO:0004842,GO:0071712,GO:0006511	Derlin-1 retrotranslocation complex|endoplasmic reticulum|integral component of membrane|metal ion binding|ubiquitin protein ligase activity|ubiquitin-like protein conjugating enzyme binding|ubiquitin-protein transferase activity|ER-associated misfolded protein catabolic process|ubiquitin-dependent protein catabolic process	csv04141	Protein processing in endoplasmic reticulum
Csa4G642460	3377.78	0.293853	15.5654	23.8175	4.57395	1.24992e-54	3.41031e-51	Up	8.96445	10.138	16.8652	224.278	363.815	254.164	T19N18.70	zinc finger protein ZAT10 [Cucumis sativus]	GO:0005634,GO:0003700,GO:0046872,GO:0000978,GO:0044212,GO:0055062,GO:2000280,GO:0010200	nucleus|DNA-binding transcription factor activity|metal ion binding|RNA polymerase II proximal promoter sequence-specific DNA binding|transcription regulatory region DNA binding|phosphate ion homeostasis|regulation of root development|response to chitin
Csa4G645830	208.744	0.388681	3.50489	2.57092	1.36228	0.000456789	0.017762	Up	5.10343	4.88292	2.05827	11.9151	6.95175	11.8962		homeobox protein knotted-1-like 2 [Cucumis sativus]	GO:0005634,GO:0043565,GO:0006355	nucleus|sequence-specific DNA binding|regulation of transcription, DNA-templated
Csa4G645850	23.7601	0.509842	-3.2445	0.317718	-1.65418	0.00117657	0.0382433	Down	1.81306	3.0805	2.53854	0.766471	0.864811	0.693654	F6F22.16	LOW QUALITY PROTEIN: zinc finger CCCH domain-containing protein 23 [Cucumis sativus]	GO:0005886,GO:0003677,GO:0003700,GO:0046872,GO:0003727,GO:0006355,GO:0006979	plasma membrane|DNA binding|DNA-binding transcription factor activity|metal ion binding|single-stranded RNA binding|regulation of transcription, DNA-templated|response to oxidative stress
Csa4G648530	268.605	0.234594	6.7594	3.00156	1.58571	1.38562e-11	2.75633e-09	Up	4.05405	4.63617	3.77118	12.4318	9.11144	15.6885		vitellogenin-2 [Cucumis sativus]
Csa4G648590	379.644	0.188614	-6.58987	0.42251	-1.24294	4.4021e-11	8.32432e-09	Down	30.4254	26.4284	21.4574	10.2755	10.4737	12.0083		uncharacterized protein LOC116403240 [Cucumis sativus]
Csa4G650230	141.974	0.306087	12.5515	14.3387	3.84185	3.901e-36	3.72526e-33	Up	1.54312	2.17559	1.13869	25.2639	20.2981	23.4676	F6A4.130	protein GLUTAMINE DUMPER 5 [Cucumis sativus]	GO:0016021,GO:0006865,GO:0080143	integral component of membrane|amino acid transport|regulation of amino acid export
Csa4G652040	191.167	0.209536	-6.36079	0.396993	-1.33281	2.00719e-10	3.36275e-08	Down	3.85809	4.12722	4.96679	1.52128	1.78874	1.76949	MBG8_9	cytochrome b561, DM13 and DOMON domain-containing protein At5g54830 [Cucumis sativus]	GO:0005768,GO:0005794,GO:0016021,GO:0005802,GO:0046872,GO:0055114	endosome|Golgi apparatus|integral component of membrane|trans-Golgi network|metal ion binding|oxidation-reduction process
Csa4G652740	192.318	0.225887	14.1061	9.10322	3.18638	3.48352e-45	5.11783e-42	Up	3.40501	3.74957	3.03295	33.0675	27.2454	31.4755		hypothetical protein Csa_012581 [Cucumis sativus]
Csa5G025910	408.781	0.278404	4.96397	2.60628	1.38199	6.90654e-07	6.46608e-05	Up	4.5639	5.50572	7.75428	14.2339	18.6695	12.7131	T23K23.18	heat stress transcription factor A-8 [Cucumis sativus]	GO:0005737,GO:0005634,GO:0003700,GO:0000978,GO:0043565,GO:0034605,GO:0061408	cytoplasm|nucleus|DNA-binding transcription factor activity|RNA polymerase II proximal promoter sequence-specific DNA binding|sequence-specific DNA binding|cellular response to heat|positive regulation of transcription from RNA polymerase II promoter in response to heat stress
Csa5G097460	170.204	0.262373	5.11657	2.53582	1.34245	3.11136e-07	3.19483e-05	Up	4.72792	4.32106	3.64493	8.65235	9.1973	14.2076	F12G12.21	immune-associated nucleotide-binding protein 9 [Cucumis sativus]	GO:0005525	GTP binding
Csa5G140470	330.986	0.1532	-7.90744	0.431843	-1.21142	2.62741e-15	8.65188e-13	Down	49.3409	58.2575	53.6652	21.2346	22.5256	25.1319		hypothetical protein Csa_000564 [Cucumis sativus]
Csa5G146260	358.398	0.157044	-11.5212	0.285324	-1.80933	1.03201e-30	7.03942e-28	Down	35.3989	39.1541	33.0201	9.46029	10.4023	10.4569	MNJ7.20	RING-H2 finger protein ATL79 [Cucumis sativus]	GO:0016021,GO:0046872,GO:0016740,GO:0016567	integral component of membrane|metal ion binding|transferase activity|protein ubiquitination
Csa5G146930	654.71	0.324993	9.12573	7.81257	2.9658	7.1252e-20	3.40211e-17	Up	8.62673	9.78562	16.993	73.8709	119.186	78.596		uncharacterized protein LOC105435432 [Cucumis sativus]
Csa5G150450	2135.8	0.381989	3.55145	2.56084	1.35662	0.00038311	0.0155021	Up	92.5562	66.9673	38.4315	173.489	90.0934	244.248		PREDICTED: uncharacterized protein LOC103482815 [Cucumis melo]
Csa5G152150	19.4266	0.622352	3.45538	4.4397	2.15046	0.000549509	0.0205786	Up	0.420783	0.684513	0.429923	3.0564	1.38952	2.3182	At1g64065	uncharacterized protein LOC101212153 [Cucumis sativus]	GO:0016021,GO:0005886	integral component of membrane|plasma membrane
Csa5G152240	194.66	0.482352	4.24623	4.13583	2.04818	2.17402e-05	0.00142686	Up	3.59598	4.08292	9.37269	12.7934	33.0797	23.5763	F22L4.5	heavy metal-associated isoprenylated plant protein 39 isoform X2 [Cucumis sativus]	GO:0046872,GO:0030001	metal ion binding|metal ion transport
Csa5G152910	175.425	0.283314	-4.01255	0.454764	-1.13681	6.00671e-05	0.00336429	Down	18.2638	19.0402	20.1693	11.4516	5.77449	8.67045	F2A19.60	E3 ubiquitin-protein ligase RHA1B [Cucumis sativus]
Csa5G153000	122.064	0.224487	-4.82844	0.471745	-1.08392	1.37604e-06	0.000120555	Down	4.99346	4.84489	5.28415	1.97391	2.41455	2.6712	MYC6.4	BTB/POZ domain-containing protein At5g41330 [Cucumis sativus]	GO:0051260,GO:0016567	protein homooligomerization|protein ubiquitination
Csa5G154790	246.935	0.205571	-4.92895	0.495428	-1.01325	8.26721e-07	7.55481e-05	Down	20.8917	19.9994	17.2407	10.8392	7.50544	10.1976	F2K11.21	protein LURP-one-related 4 [Cucumis sativus]
Csa5G165850	447.959	0.272592	14.8932	16.6766	4.05976	3.64928e-50	8.7122e-47	Up	3.0615	2.50481	1.426	42.6998	32.3364	40.5077	dl4785w	ethylene-responsive transcription factor 1A [Cucumis sativus]	GO:0005634,GO:0003677,GO:0003700,GO:0051301,GO:0006952,GO:0009873,GO:0010087,GO:0010200	nucleus|DNA binding|DNA-binding transcription factor activity|cell division|defense response|ethylene-activated signaling pathway|phloem or xylem histogenesis|response to chitin
Csa5G167120	2347.31	0.127496	23.6205	8.06405	3.0115	2.37606e-123	4.53804e-119	Up	26.7312	29.2462	25.5296	234.042	208.856	205.534	ERF-4	ethylene-responsive transcription factor ERF105 [Cucumis sativus]	GO:0005634,GO:0003677,GO:0003700,GO:0006952,GO:0009873	nucleus|DNA binding|DNA-binding transcription factor activity|defense response|ethylene-activated signaling pathway
Csa5G171710	250.493	0.266961	-5.51234	0.360587	-1.47158	3.54103e-08	4.22688e-06	Down	8.85444	8.88251	5.42389	2.36078	2.57876	3.34525	MMI9.5	xyloglucan galactosyltransferase XLT2 [Cucumis sativus]	GO:0005794,GO:0000139,GO:0016021,GO:0008378,GO:0006486,GO:0009969	Golgi apparatus|Golgi membrane|integral component of membrane|galactosyltransferase activity|protein glycosylation|xyloglucan biosynthetic process
Csa5G174570	11.1291	1.05662	4.20586	21.7661	4.44401	2.60094e-05	0.00167257	Up	0.0632109	0.0616974	0.0645841	1.31183	1.62815	1.11003	MSG15.7	dehydration-responsive element-binding protein 1B [Cucumis sativus]	GO:0005634,GO:0003700,GO:0043565,GO:0009738,GO:0019760	nucleus|DNA-binding transcription factor activity|sequence-specific DNA binding|abscisic acid-activated signaling pathway|glucosinolate metabolic process
Csa5G177140	187.206	0.220892	5.77814	2.42225	1.27635	7.55291e-09	1.01587e-06	Up	1.71183	1.48519	2.12149	4.02956	3.83138	4.91193	F12L6.2	probable receptor-like protein kinase At2g39360 [Cucumis sativus]
Csa5G197110	251.32	0.265167	-4.24094	0.458643	-1.12456	2.22591e-05	0.00145591	Down	22.7887	23.4754	20.4459	10.6116	12.1949	7.17299		18.1 kDa class I heat shock protein [Cucumis sativus]	GO:0005737	cytoplasm	csv04141	Protein processing in endoplasmic reticulum
Csa5G198230	17.6388	0.625226	3.2851	4.15236	2.05393	0.00101946	0.0342794	Up	0.565344	0.551808	0.577626	2.17893	3.12039	1.58512		uncharacterized protein LOC101212825 isoform X1 [Cucumis sativus]
Csa5G207940	10945.9	0.122803	22.2574	6.64961	2.73327	9.55768e-110	4.56355e-106	Up	66.8947	67.4885	80.1638	477.195	473.558	457.341	T07M07.3	zinc finger CCCH domain-containing protein 29 [Cucumis sativus]	GO:0005634,GO:0003677,GO:0003700,GO:0046872,GO:0050832,GO:0006355,GO:0010200,GO:0009409	nucleus|DNA binding|DNA-binding transcription factor activity|metal ion binding|defense response to fungus|regulation of transcription, DNA-templated|response to chitin|response to cold
Csa5G412760	884.71	0.187829	-5.80827	0.469448	-1.09096	6.31229e-09	8.67327e-07	Down	51.6577	50.4209	41.9053	26.66	20.2772	19.6935	F10B6.26	nudix hydrolase 18, mitochondrial [Cucumis sativus]	GO:0005737,GO:0005739,GO:0005634,GO:0016787,GO:0046872	cytoplasm|mitochondrion|nucleus|hydrolase activity|metal ion binding
Csa5G487700	715.314	0.397324	3.50445	2.62515	1.3924	0.000457559	0.017762	Up	48.3806	33.459	16.2288	104.61	53.3083	98.0276		hypothetical protein Csa_008046 [Cucumis sativus]
Csa5G494420	18.6183	0.567532	3.24327	3.58174	1.84066	0.00118166	0.0382519	Up	0.487627	0.475952	0.387504	1.12442	1.66393	2.01485		hypothetical protein Csa_008278 [Cucumis sativus]
Csa5G517130	918.203	0.21231	12.4363	6.23479	2.64034	1.66102e-35	1.51066e-32	Up	7.07536	8.14711	10.1607	45.9455	61.3722	48.4667		uncharacterized protein LOC101214727 [Cucumis sativus]
Csa5G517150	76.3295	0.35699	3.77647	2.54588	1.34816	0.000159065	0.00733221	Up	2.01909	1.53718	1.77414	3.18459	5.76072	4.42166	OsJ_16858	receptor-like cytoplasmic kinase 176 isoform X1 [Cucumis sativus]	GO:0005524,GO:0004674,GO:0045087	ATP binding|protein serine/threonine kinase activity|innate immune response
Csa5G547610	736.67	0.492115	3.85958	3.73047	1.89936	0.000113582	0.00574248	Up	8.12711	11.7401	31.8307	46.6635	90.9259	51.5465	T8O11.16	nudix hydrolase 17, mitochondrial [Cucumis sativus]	GO:0005737,GO:0005739,GO:0005634,GO:0016787,GO:0046872	cytoplasm|mitochondrion|nucleus|hydrolase activity|metal ion binding
Csa5G571460	1248.87	0.208934	-5.03071	0.482605	-1.05109	4.88663e-07	4.78614e-05	Down	48.7842	55.6428	64.8407	24.4438	32.6197	23.2168	F23N20.9	probable ribose-5-phosphate isomerase 1 [Cucumis sativus]	GO:0005737,GO:0005829,GO:0004751,GO:0030244,GO:0009052,GO:0080167,GO:0046109	cytoplasm|cytosol|ribose-5-phosphate isomerase activity|cellulose biosynthetic process|pentose-phosphate shunt, non-oxidative branch|response to karrikin|uridine biosynthetic process	csv00030,csv00710	Pentose phosphate pathway|Carbon fixation in photosynthetic organisms
Csa5G571570	74.1503	0.407393	7.40472	8.09273	3.01663	1.3143e-13	3.48637e-11	Up	1.56506	0.827441	0.866155	10.4206	8.5275	7.00562	F1O17.8	dnaJ homolog subfamily B member 6 [Cucumis sativus]	GO:0005634,GO:0003676,GO:0008270	nucleus|nucleic acid binding|zinc ion binding
Csa5G593390	1898.31	0.284196	4.04027	2.21641	1.14823	5.33895e-05	0.00304353	Up	32.6897	32.1271	51.6958	70.7156	112.405	70.3639	T9J22.16	protein JINGUBANG [Cucumis sativus]	GO:0005737,GO:0005634,GO:0009846	cytoplasm|nucleus|pollen germination
Csa5G603940	504.202	0.181716	7.71721	2.6433	1.40234	1.18902e-14	3.44078e-12	Up	7.68406	7.50008	8.36116	17.5013	23.6066	20.2593	F3I6.10	probable galacturonosyltransferase-like 9 [Cucumis sativus]	GO:0005794,GO:0000139,GO:0016021,GO:0047262,GO:0071555,GO:0045489	Golgi apparatus|Golgi membrane|integral component of membrane|polygalacturonate 4-alpha-galacturonosyltransferase activity|cell wall organization|pectin biosynthetic process
Csa5G606790	180.221	0.238129	-6.04805	0.368512	-1.44022	1.46608e-09	2.25812e-07	Down	14.1109	18.5637	12.4229	5.09297	5.13862	6.22232	F4N2.12	protein BIG GRAIN 1-like E [Cucumis sativus]	GO:0005886,GO:0060918,GO:0009734,GO:0010929	plasma membrane|auxin transport|auxin-activated signaling pathway|positive regulation of auxin mediated signaling pathway
Csa5G608380	953.918	0.32921	3.62693	2.2879	1.19402	0.000286807	0.0121189	Up	16.8168	20.992	37.3431	55.1125	68.9419	44.6946	F14K14.5	AP2/ERF and B3 domain-containing transcription repressor RAV2 [Cucumis sativus]	GO:0005634,GO:0003700,GO:0043565,GO:0009873,GO:0045892	nucleus|DNA-binding transcription factor activity|sequence-specific DNA binding|ethylene-activated signaling pathway|negative regulation of transcription, DNA-templated
Csa5G611700	430.314	0.258369	6.5329	3.22187	1.6879	6.45081e-11	1.19615e-08	Up	6.06924	6.10526	7.18187	15.8409	26.8727	18.5844	F10A8.17	probable ribose-5-phosphate isomerase 2 [Cucumis sativus]	GO:0005737,GO:0004751,GO:0008219,GO:0009052,GO:0010228	cytoplasm|ribose-5-phosphate isomerase activity|cell death|pentose-phosphate shunt, non-oxidative branch|vegetative to reproductive phase transition of meristem	csv00030,csv00710	Pentose phosphate pathway|Carbon fixation in photosynthetic organisms
Csa5G613560	96.0433	0.301374	-4.54434	0.387013	-1.36955	5.51081e-06	0.000421004	Down	7.46407	6.75551	4.99171	2.9103	2.01666	2.42991	MUK11.14	transcription repressor OFP13 [Cucumis sativus]	GO:0005634,GO:0045892	nucleus|negative regulation of transcription, DNA-templated
Csa5G615820	317.37	0.264425	5.01198	2.50584	1.3253	5.3872e-07	5.19647e-05	Up	6.30366	6.20944	3.62098	14.8002	10.8493	14.4035	T23G18.9	GABA transporter 1 [Cucumis sativus]	GO:0016021,GO:0005886,GO:0015171,GO:0015185,GO:0003333,GO:0015812	integral component of membrane|plasma membrane|amino acid transmembrane transporter activity|gamma-aminobutyric acid transmembrane transporter activity|amino acid transmembrane transport|gamma-aminobutyric acid transport
Csa5G636620	756.686	0.447289	7.29784	9.60803	3.26424	2.92433e-13	7.25347e-11	Up	5.05257	5.92841	12.5214	46.6278	117.468	56.7453	K5K13.13	probable calcium-binding protein CML47 [Cucumis sativus]	GO:0005634,GO:0005509,GO:0030234,GO:0019722,GO:0051300	nucleus|calcium ion binding|enzyme regulator activity|calcium-mediated signaling|spindle pole body organization
Csa5G646730	18.81	0.545398	-3.58046	0.258318	-1.95278	0.000342986	0.0141178	Down	0.766021	0.996906	0.840636	0.206077	0.196745	0.263763	F10C21.4	hypothetical protein Csa_008304 [Cucumis sativus]
Csa5G647490	921.465	0.292222	3.89177	2.19963	1.13726	9.95157e-05	0.00517362	Up	17.9223	18.6192	10.8828	36.2478	22.3799	45.369	T13D8.29	hypothetical protein Csa_009075 [Cucumis sativus]	GO:0005829,GO:0047134,GO:0045454,GO:0009860,GO:0010183,GO:0080092,GO:0046686	cytosol|protein-disulfide reductase activity|cell redox homeostasis|pollen tube growth|pollen tube guidance|regulation of pollen tube growth|response to cadmium ion
Csa5G647500	464.879	0.312394	3.70609	2.23111	1.15776	0.000210487	0.00937083	Up	8.93116	10.2799	5.59563	20.1379	11.658	23.3255	T13D8.29	hypothetical protein Csa_008912 [Cucumis sativus]	GO:0005829,GO:0047134,GO:0045454,GO:0009860,GO:0010183,GO:0080092,GO:0046686	cytosol|protein-disulfide reductase activity|cell redox homeostasis|pollen tube growth|pollen tube guidance|regulation of pollen tube growth|response to cadmium ion
Csa6G004550	1796.03	0.155518	-7.08037	0.466154	-1.10112	1.43768e-12	3.30823e-10	Down	72.4387	78.698	65.6153	35.8777	26.4826	37.8609	A_IG005I10.21	cytochrome P450 86A8 [Cucumis sativus]	GO:0016021,GO:0018685,GO:0070330,GO:0020037,GO:0005506,GO:0006952,GO:0006631	integral component of membrane|alkane 1-monooxygenase activity|aromatase activity|heme binding|iron ion binding|defense response|fatty acid metabolic process	csv00073	Cutin, suberine and wax biosynthesis
Csa6G008840	245.402	0.235577	4.41907	2.0577	1.04103	9.91248e-06	0.000709058	Up	24.2138	22.639	15.8856	37.0274	47.0921	43.3112		uncharacterized protein LOC101209106 [Cucumis sativus]
Csa6G010030	1279.15	0.338604	10.0108	10.4808	3.38968	1.36688e-23	7.67823e-21	Up	5.77533	5.52759	7.84862	43.8407	99.8754	52.8237	T28M21.16	nematode resistance protein-like HSPRO2 [Cucumis sativus]	GO:0005737,GO:0020037,GO:0046872,GO:0009816,GO:0006979,GO:0009751,GO:0019441	cytoplasm|heme binding|metal ion binding|defense response to bacterium, incompatible interaction|response to oxidative stress|response to salicylic acid|tryptophan catabolic process to kynurenine
Csa6G012800	145.34	0.248074	6.17711	2.89263	1.53238	6.52873e-10	1.07493e-07	Up	5.71588	8.04035	5.49652	20.2356	16.5713	18.2342	T19C21.20	abscisic acid receptor PYL4 [Cucumis sativus]	GO:0005737,GO:0005634,GO:0005886,GO:0010427,GO:0042803,GO:0004864,GO:0038023,GO:0009738,GO:0080163	cytoplasm|nucleus|plasma membrane|abscisic acid binding|protein homodimerization activity|protein phosphatase inhibitor activity|signaling receptor activity|abscisic acid-activated signaling pathway|regulation of protein serine/threonine phosphatase activity	csv04016,csv04075	MAPK signaling pathway - plant|Plant hormone signal transduction
Csa6G014510	105.036	0.584022	5.07463	7.8012	2.9637	3.88243e-07	3.88223e-05	Up	0.82645	1.75999	2.91703	6.78262	22.4781	12.8057		hypothetical protein Csa_005505 [Cucumis sativus]
Csa6G014780	74.0455	0.319595	-4.1305	0.400511	-1.32009	3.6198e-05	0.00223015	Down	2.55832	2.54126	2.24379	0.704778	1.21115	0.982246	F3D13.1	pentatricopeptide repeat-containing protein At4g01400, mitochondrial [Cucumis sativus]
Csa6G028940	87.9176	0.316221	-3.32675	0.482303	-1.05199	0.000878662	0.0304292	Down	7.74843	5.47316	5.31256	3.38536	2.22204	3.2648		uncharacterized protein LOC105435751 [Cucumis sativus]
Csa6G038510	166.64	0.278759	-8.74308	0.18464	-2.43721	2.2685e-18	1.00758e-15	Down	32.1836	27.9331	23.0376	3.59952	5.34571	6.2708		uncharacterized protein LOC101204892 [Cucumis sativus]
Csa6G055410	188.629	0.21644	6.84839	2.79387	1.48227	7.46862e-12	1.56751e-09	Up	2.77558	3.23849	3.71597	8.83894	9.57649	8.37071	K19P17.5	putative serine/threonine-protein kinase [Cucumis sativus]
Csa6G062320	461.82	0.253921	4.6049	2.249	1.16928	4.12668e-06	0.000328398	Up	30.9184	36.3478	52.5096	102.094	85.7638	77.5035		uncharacterized protein LOC101217755 [Cucumis sativus]
Csa6G080300	43.3565	0.355026	-3.71014	0.401314	-1.3172	0.000207142	0.0093141	Down	1.31625	1.48759	1.58078	0.527159	0.503287	0.715616	F2G19.6	receptor-like protein 12 [Cucumis sativus]	GO:0016021,GO:0016020,GO:0005886	integral component of membrane|membrane|plasma membrane
Csa6G083030	285.936	0.353398	3.54963	2.38573	1.25443	0.00038577	0.0155439	Up	9.11175	9.28983	4.97746	22.2798	10.993	22.2261		uncharacterized protein LOC101208849 [Cucumis sativus]
Csa6G092560	317.745	0.300913	-3.5922	0.47272	-1.08094	0.000327896	0.0136526	Down	17.1447	17.2199	25.4669	7.41658	12.4137	7.94392	F14G9.23	protein SMALL AUXIN UP-REGULATED RNA 10 [Cucumis sativus]	GO:0005737,GO:0009734,GO:0007275,GO:0040008	cytoplasm|auxin-activated signaling pathway|multicellular organism development|regulation of growth	csv04075	Plant hormone signal transduction
Csa6G111910	78.03	0.337669	-3.98549	0.393443	-1.34577	6.73421e-05	0.00367476	Down	2.21361	2.1246	1.99783	0.574243	1.09648	0.781265	F10M23.20	pentatricopeptide repeat-containing protein At4g26680, mitochondrial [Cucumis sativus]
Csa6G128040	1071.86	0.212556	-5.52418	0.44313	-1.1742	3.31027e-08	3.97627e-06	Down	50.8204	52.6507	61.8642	22.9017	29.4166	19.6113	RMA1H1	E3 ubiquitin-protein ligase RMA1H1 [Cucumis sativus]	GO:0005789,GO:0016021,GO:0046872,GO:0004842,GO:0043161,GO:0016567,GO:0009409,GO:0009723,GO:0006970,GO:0009414,GO:0009611	endoplasmic reticulum membrane|integral component of membrane|metal ion binding|ubiquitin-protein transferase activity|proteasome-mediated ubiquitin-dependent protein catabolic process|protein ubiquitination|response to cold|response to ethylene|response to osmotic stress|response to water deprivation|response to wounding	csv04141	Protein processing in endoplasmic reticulum
Csa6G137590	52.3218	0.600639	-4.96699	0.126449	-2.98337	6.79996e-07	6.39766e-05	Down	5.62759	5.6593	12.9807	0.442388	1.52048	1.05695	MBK21.21	auxin-responsive protein SAUR71 [Cucumis sativus]	GO:0005737,GO:0009734,GO:0007275,GO:0040008	cytoplasm|auxin-activated signaling pathway|multicellular organism development|regulation of growth	csv04075	Plant hormone signal transduction
Csa6G148320	223.312	0.21375	-4.82116	0.489534	-1.03052	1.42727e-06	0.000123906	Down	15.267	13.6379	12.1323	6.71663	7.29696	5.76412		hypothetical protein Csa_020607 [Cucumis sativus]
Csa6G183190	1367.56	0.164677	-6.48147	0.477196	-1.06735	9.0834e-11	1.64381e-08	Down	35.3068	43.5473	47.034	17.6397	18.2682	23.6961	AS1	asparagine synthetase [Cucumis melo var. makuwa]	GO:0004066,GO:0005524,GO:0006541,GO:0070981	asparagine synthase (glutamine-hydrolyzing) activity|ATP binding|glutamine metabolic process|L-asparagine biosynthetic process	csv00250	Alanine, aspartate and glutamate metabolism
Csa6G217470	60.8005	0.347321	-5.02174	0.298509	-1.74415	5.12053e-07	4.96432e-05	Down	7.20385	5.75902	6.72945	1.56622	2.44685	1.77178		uncharacterized protein LOC101207122 [Cucumis sativus]
Csa6G237600	541.611	0.18622	-9.17581	0.305932	-1.70872	4.48172e-20	2.25254e-17	Down	27.2085	30.4615	26.4484	10.2915	7.0416	8.09369	Niben101Scf03191g04002	probable aspartic proteinase GIP2 [Cucumis sativus]
Csa6G303770	437.239	0.293975	-3.83972	0.457302	-1.12878	0.000123176	0.00601671	Down	25.1584	24.1136	20.2629	10.3091	6.28706	15.2184		histone H2A-like [Cucumis sativus]	GO:0000786,GO:0005634,GO:0003677,GO:0046982	nucleosome|nucleus|DNA binding|protein heterodimerization activity
Csa6G318710	370.802	0.398274	4.7018	3.66193	1.8726	2.57883e-06	0.000213217	Up	5.72642	5.75054	15.3584	28.2248	35.4017	33.5011	MGL6.19	RING-H2 finger protein ATL2 [Cucumis sativus]	GO:0016021,GO:0046872,GO:0016740,GO:0006952,GO:0016567,GO:0010200	integral component of membrane|metal ion binding|transferase activity|defense response|protein ubiquitination|response to chitin
Csa6G358130	190.393	0.272222	4.55295	2.36102	1.23941	5.29001e-06	0.000407395	Up	6.90214	6.63854	3.96358	14.9515	13.0267	12.8024		uncharacterized protein LOC101207424 [Cucumis sativus]
Csa6G363520	1901.88	0.34787	3.9916	2.61817	1.38856	6.56285e-05	0.00361222	Up	37.1346	42.7216	92.5024	115.488	170.689	160.071		uncharacterized protein LOC101208403 [Cucumis sativus]
Csa6G363530	664.25	0.291321	11.5608	10.3238	3.3679	6.51242e-31	4.60669e-28	Up	6.27749	5.61659	11.6251	75.3169	88.2958	75.7208		uncharacterized protein LOC105435852 [Cucumis sativus]
Csa6G363540	49.3733	0.645875	6.93624	22.3151	4.47995	4.02675e-12	8.64122e-10	Up	0.185188	0.451885	0.567633	4.70797	12.1084	9.66048		hypothetical protein Csa_018923 [Cucumis sativus]
Csa6G421060	138.287	0.266075	-8.9368	0.192394	-2.37786	4.00617e-19	1.86619e-16	Down	17.2456	18.0398	13.6188	2.99439	2.45039	3.90356		hypothetical protein Csa_003269 [Cucumis sativus]
Csa6G421630	990.891	0.160694	8.21739	2.49749	1.32048	2.07983e-16	7.63899e-14	Up	22.8867	28.1581	32.5213	68.9507	67.0669	70.1799	ACO1	1-aminocyclopropane-1-carboxylate oxidase 1-like [Cucumis sativus]	GO:0009815,GO:0031418,GO:0046872,GO:0009693,GO:0009835	1-aminocyclopropane-1-carboxylate oxidase activity|L-ascorbic acid binding|metal ion binding|ethylene biosynthetic process|fruit ripening	csv00270	Cysteine and methionine metabolism
Csa6G425790	132.787	0.498877	4.24826	4.34501	2.11936	2.15441e-05	0.00142098	Up	1.59453	1.70819	2.62257	3.95485	13.8701	7.39199	T10D17_50	probable CCR4-associated factor 1 homolog 9 [Cucumis sativus]	GO:0030015,GO:0005634,GO:0000932,GO:0008408,GO:0046872,GO:0004535,GO:0003723,GO:0042742,GO:0002213,GO:0043928,GO:0017148,GO:0000289,GO:0009611	CCR4-NOT core complex|nucleus|P-body|3'-5' exonuclease activity|metal ion binding|poly(A)-specific ribonuclease activity|RNA binding|defense response to bacterium|defense response to insect|exonucleolytic nuclear-transcribed mRNA catabolic process involved in deadenylation-dependent decay|negative regulation of translation|nuclear-transcribed mRNA poly(A) tail shortening|response to wounding	csv03018	RNA degradation
Csa6G446310	75.057	0.291586	-3.77357	0.466412	-1.10032	0.000160927	0.00738831	Down	2.1733	2.66391	3.09838	1.20624	1.10154	1.35743		hypothetical protein Csa_004025 [Cucumis sativus]
Csa6G448730	1028.17	0.21542	5.97795	2.44151	1.28777	2.25969e-09	3.26952e-07	Up	11.1909	16.97	16.7381	42.0787	30.2513	35.9954	T22K18.12	threonine dehydratase biosynthetic, chloroplastic [Cucumis sativus]	GO:0009507,GO:0004794,GO:0030170,GO:0009097	chloroplast|L-threonine ammonia-lyase activity|pyridoxal phosphate binding|isoleucine biosynthetic process	csv00260,csv00290	Glycine, serine and threonine metabolism|Valine, leucine and isoleucine biosynthesis
Csa6G454460	185.989	0.23393	4.92693	2.22307	1.15256	8.35296e-07	7.59682e-05	Up	5.34313	6.4953	5.35995	10.3327	14.6287	12.7448	MHF15.16	NDR1/HIN1-like protein 3 [Cucumis sativus]	GO:0046658,GO:0005794,GO:0016021,GO:0005886,GO:0009506,GO:0005774,GO:0042742,GO:0009816,GO:0051607,GO:0009617,GO:0009751,GO:0009611	anchored component of plasma membrane|Golgi apparatus|integral component of membrane|plasma membrane|plasmodesma|vacuolar membrane|defense response to bacterium|defense response to bacterium, incompatible interaction|defense response to virus|response to bacterium|response to salicylic acid|response to wounding
Csa6G465000	398.575	0.178402	9.63213	3.29068	1.71839	5.85048e-22	3.19253e-19	Up	18.7862	19.7765	17.4859	51.1327	67.0384	64.009		hypothetical protein Csa_002744 [Cucumis sativus]
Csa6G476020	130.254	0.243009	5.90967	2.70589	1.4361	3.42786e-09	4.84954e-07	Up	3.37051	4.3145	4.23409	8.88694	10.6741	12.3857	MNJ7.14	Cysteine proteinase inhibitor 1 [Cucumis melo var. makuwa]	GO:0005618,GO:0005576,GO:0004869,GO:0034605,GO:0006952,GO:0010030	cell wall|extracellular region|cysteine-type endopeptidase inhibitor activity|cellular response to heat|defense response|positive regulation of seed germination
Csa6G483230	1127.79	0.164782	10.5563	3.33916	1.73948	4.75083e-26	3.02454e-23	Up	39.9732	50.877	36.6757	150.816	123.949	146.338		hypothetical protein E6C27_scaffold529G00200 [Cucumis melo var. makuwa]
Csa6G483240	106.575	0.31437	5.46916	3.29286	1.71934	4.5217e-08	5.29816e-06	Up	6.1925	5.94515	3.3191	16.5383	14.3814	19.6098		hypothetical protein E6C27_scaffold529G00200 [Cucumis melo var. makuwa]
Csa6G487700	122.62	0.308479	-7.56899	0.198213	-2.33487	3.76135e-14	1.04113e-11	Down	8.31722	7.83571	6.53969	2.02628	1.18221	1.2327	F18O14.2	probable galacturonosyltransferase-like 1 [Cucumis sativus]	GO:0005783,GO:0005789,GO:0005794,GO:0016021,GO:0047262,GO:0052386,GO:0010417,GO:0048366,GO:0032504,GO:0045489,GO:0010051	endoplasmic reticulum|endoplasmic reticulum membrane|Golgi apparatus|integral component of membrane|polygalacturonate 4-alpha-galacturonosyltransferase activity|cell wall thickening|glucuronoxylan biosynthetic process|leaf development|multicellular organism reproduction|pectin biosynthetic process|xylem and phloem pattern formation
Csa6G497240	193.927	0.176163	6.94434	2.33486	1.22334	3.80245e-12	8.25262e-10	Up	7.27551	6.70043	6.95398	15.5252	14.8803	18.0008	K21L13.18	uncharacterized protein At5g65660 [Cucumis sativus]	GO:0016021,GO:0005886	integral component of membrane|plasma membrane
Csa6G499150	219.482	0.295392	3.4155	2.01239	1.00891	0.000636645	0.023029	Up	5.10398	6.80204	10.0286	12.1201	15.6067	15.9184		jacalin-related lectin 34-like [Cucumis sativus]
Csa6G501220	115.815	0.221134	-4.5769	0.495822	-1.01211	4.71925e-06	0.000369397	Down	8.93037	8.28611	8.95541	4.63334	3.76819	4.44164	F10A8.3	putative E3 ubiquitin-protein ligase RHA2B [Cucumis melo var. makuwa]	GO:0005737,GO:0005634,GO:0046872,GO:0061630,GO:0004842,GO:0009738,GO:0009789,GO:0016567,GO:0047484,GO:0080167	cytoplasm|nucleus|metal ion binding|ubiquitin protein ligase activity|ubiquitin-protein transferase activity|abscisic acid-activated signaling pathway|positive regulation of abscisic acid-activated signaling pathway|protein ubiquitination|regulation of response to osmotic stress|response to karrikin
Csa6G507360	22.0651	0.571959	4.28083	5.45832	2.44846	1.86198e-05	0.00124779	Up	0.202599	0.263664	0.2415	0.910991	1.60567	1.29057	MtrunA17_Chr8g0371161	ammonium transporter 3 member 3 [Cucumis sativus]
Csa6G511830	54.1069	0.323707	-4.22001	0.387953	-1.36605	2.44292e-05	0.00157626	Down	3.82044	3.0086	3.54857	1.26137	1.20425	1.52477	F24O1.13	serine/threonine/tyrosine-protein kinase HT1 [Cucumis sativus]	GO:0005524,GO:0004674	ATP binding|protein serine/threonine kinase activity
Csa6G516660	19.0005	0.586217	3.19091	3.65676	1.87056	0.00141825	0.0440499	Up	0.219889	0.343399	0.539199	1.14085	1.21989	1.63543		uncharacterized protein LOC105435955 [Cucumis sativus]
Csa6G516960	1006.91	0.360706	7.73171	6.9109	2.78887	1.06114e-14	3.11797e-12	Up	7.68672	6.75634	16.941	55.8334	86.2769	71.9613	T1F9.17	F-box protein At4g05010 [Cucumis sativus]	GO:0009961,GO:0009737,GO:0009617,GO:0009753,GO:0006970,GO:0009751,GO:0009651,GO:0009611	response to 1-aminocyclopropane-1-carboxylic acid|response to abscisic acid|response to bacterium|response to jasmonic acid|response to osmotic stress|response to salicylic acid|response to salt stress|response to wounding
Csa6G523440	17.2325	0.616477	-3.60385	0.21439	-2.22169	0.000313541	0.0131323	Down	0.781453	0.711893	0.771815	0.243265	0.103222	0.134538	Solyc08g016720.1.1	9-cis-epoxycarotenoid dioxygenase NCED2, chloroplastic [Cucumis sativus]	GO:0009507,GO:0009570,GO:0045549,GO:0010436,GO:0046872,GO:0016121	chloroplast|chloroplast stroma|9-cis-epoxycarotenoid dioxygenase activity|carotenoid dioxygenase activity|metal ion binding|carotene catabolic process	csv00906	Carotenoid biosynthesis
Csa6G524100	49.8052	0.388266	-5.33658	0.237827	-2.07201	9.47149e-08	1.04564e-05	Down	16.5464	17.7834	11.5871	2.89373	3.86778	4.03299		hypothetical protein Csa_003492 [Cucumis sativus]
Csa7G007930	11.2215	1.39345	-4.25794	0.0163651	-5.93323	2.06319e-05	0.00137299	Down	2.15166	1.61011	1.0992	0	0.0710527	0	MBK21.21	indole-3-acetic acid-induced protein ARG7 [Cucumis sativus]	GO:0005737,GO:0009734,GO:0007275,GO:0040008	cytoplasm|auxin-activated signaling pathway|multicellular organism development|regulation of growth	csv04075	Plant hormone signal transduction
Csa7G008430	171.021	0.223142	-13.3142	0.127543	-2.97095	1.91471e-40	2.43793e-37	Down	46.2726	42.3939	43.3622	5.00772	5.90589	5.71828	T4L20.340	auxin-responsive protein SAUR50 [Cucumis sativus]	GO:0009734,GO:0040008	auxin-activated signaling pathway|regulation of growth	csv04075	Plant hormone signal transduction
Csa7G008440	61.94	0.478873	-3.28032	0.336609	-1.57086	0.00103691	0.0346222	Down	17.7592	14.543	10.4565	7.65232	2.83286	3.7312	MCM23.13	auxin-responsive protein SAUR21 [Cucumis sativus]	GO:0005886,GO:0009734,GO:0007275,GO:0040008	plasma membrane|auxin-activated signaling pathway|multicellular organism development|regulation of growth	csv04075	Plant hormone signal transduction
Csa7G009120	14.1484	1.03279	-3.85544	0.0632905	-3.98187	0.00011552	0.00579084	Down	6.1455	3.99891	1.794	0.455495	0	0.302296		auxin-responsive protein SAUR24-like [Momordica charantia]	GO:0009734	auxin-activated signaling pathway	csv04075	Plant hormone signal transduction
Csa7G046690	494.991	0.18546	-7.86729	0.363729	-1.45906	3.62406e-15	1.1536e-12	Down	28.853	35.2491	41.553	13.0001	12.1763	12.7945		wound-responsive family protein [Cucumis melo var. makuwa]
Csa7G047400	98.2932	0.352134	4.23194	2.8093	1.49021	2.31682e-05	0.0015102	Up	1.78674	1.89898	2.59634	6.30369	6.88361	4.1015	F5H14.15	ethylene-responsive transcription factor ERF053 [Cucumis sativus]	GO:0005737,GO:0005634,GO:0003700,GO:0043565,GO:0009873,GO:1900036,GO:0045893,GO:2000070,GO:0009651	cytoplasm|nucleus|DNA-binding transcription factor activity|sequence-specific DNA binding|ethylene-activated signaling pathway|positive regulation of cellular response to heat|positive regulation of transcription, DNA-templated|regulation of response to water deprivation|response to salt stress
Csa7G048060	141.02	0.416236	6.97346	7.47775	2.9026	3.09237e-12	6.86759e-10	Up	1.39172	2.36624	0.825648	7.87282	11.697	14.469		uncharacterized protein LOC101216632 [Cucumis sativus]
Csa7G049160	168.23	0.257787	-7.79458	0.248386	-2.00934	6.46243e-15	1.99074e-12	Down	17.4394	17.4075	11.8212	3.51382	4.02565	3.9061		hypothetical protein Csa_017160 [Cucumis sativus]
Csa7G049230	1298.74	0.212213	11.9773	5.82288	2.54173	4.67544e-33	3.72067e-30	Up	19.3995	21.4559	26.1542	107.797	156.079	120.177	K7L4.1	ethylene-responsive transcription factor 4 [Cucumis sativus]	GO:0016604,GO:0005634,GO:0003700,GO:0043565,GO:0009873,GO:0009864,GO:0010105,GO:0045892,GO:0009737,GO:0010200,GO:0009723	nuclear body|nucleus|DNA-binding transcription factor activity|sequence-specific DNA binding|ethylene-activated signaling pathway|induced systemic resistance, jasmonic acid mediated signaling pathway|negative regulation of ethylene-activated signaling pathway|negative regulation of transcription, DNA-templated|response to abscisic acid|response to chitin|response to ethylene
Csa7G056500	50504.4	0.32705	4.32197	2.66383	1.4135	1.54642e-05	0.00105861	Up	3488.34	2797.8	1351.01	7045.63	4891.25	8301.35		lectin [Cucumis sativus]	GO:0030246	carbohydrate binding
Csa7G067350	22470.5	0.354169	3.46497	2.3411	1.22718	0.000530291	0.0199764	Up	1442.99	1014.55	523.441	2460.72	1521.88	2974.9		uncharacterized protein LOC105436096 [Cucumis sativus]
Csa7G067390	2476.75	0.18336	8.21915	2.84231	1.50707	2.04945e-16	7.63899e-14	Up	64.3892	101.912	83.525	245.247	210.377	246.36		uncharacterized protein LOC105436098 [Cucumis sativus]
Csa7G190690	61.6325	0.339988	-4.00728	0.388927	-1.36243	6.14209e-05	0.00342005	Down	6.32936	4.72421	5.83285	1.93168	1.72126	2.88447	T19K4.170	Chaperone protein dnaJ 11 [Cucumis melo var. makuwa]	GO:0009507,GO:0009570,GO:0005634,GO:0009536	chloroplast|chloroplast stroma|nucleus|plastid
Csa7G200810	291.576	0.347	3.32599	2.22548	1.15412	0.00088106	0.0304292	Up	4.84311	4.60489	2.13289	9.29283	6.14217	10.1782	F14J16.9	cellulose synthase-like protein E1 [Cucumis sativus]	GO:0005783,GO:0005794,GO:0000139,GO:0016021,GO:0005886,GO:0005802,GO:0016760,GO:0016759,GO:0071555,GO:0030244,GO:0009833	endoplasmic reticulum|Golgi apparatus|Golgi membrane|integral component of membrane|plasma membrane|trans-Golgi network|cellulose synthase (UDP-forming) activity|cellulose synthase activity|cell wall organization|cellulose biosynthetic process|plant-type primary cell wall biogenesis
Csa7G222880	32491.5	0.411623	3.82995	2.98245	1.5765	0.000128167	0.00621285	Up	1484.84	1080.95	393	3091.34	1993.12	3704.95		Phloem filament protein [Cucumis melo var. makuwa]
Csa7G239580	319.835	0.162579	-6.6091	0.474836	-1.0745	3.86671e-11	7.45963e-09	Down	70.0061	62.7771	77.3394	32.6317	31.3106	34.7701
Csa7G267910	38.0035	0.417527	3.58887	2.82539	1.49845	0.000332118	0.0137821	Up	3.11896	2.43542	2.0395	8.28522	7.04488	5.79931
Csa7G272130	170.626	0.249573	-4.71021	0.442717	-1.17554	2.47458e-06	0.000206384	Down	4.03645	4.4107	3.22044	1.90233	1.76839	1.41201	K21L13.7	pentatricopeptide repeat-containing protein At5g65560 isoform X1 [Cucumis sativus]
Csa7G298820	843.034	0.213846	10.3363	4.62798	2.21038	4.8273e-25	2.88114e-22	Up	6.81702	6.72384	8.43145	29.1388	40.8285	30.0454	T12P18.5	uncharacterized protein LOC101216228 [Cucumis sativus]
Csa7G354520	775.095	0.220685	-7.29356	0.327693	-1.60958	3.01868e-13	7.39151e-11	Down	35.9172	37.7829	41.2232	10.8246	15.7719	10.3779	MJL12.21	serine/threonine-protein kinase OXI1 [Cucumis sativus]	GO:0005737,GO:0005634,GO:0005886,GO:0005524,GO:0016301,GO:0004672,GO:0019901,GO:0004674,GO:0006952,GO:0006468,GO:0006979,GO:0009611	cytoplasm|nucleus|plasma membrane|ATP binding|kinase activity|protein kinase activity|protein kinase binding|protein serine/threonine kinase activity|defense response|protein phosphorylation|response to oxidative stress|response to wounding	csv04016	MAPK signaling pathway - plant
Csa7G388390	97.8125	0.278516	-4.43489	0.424788	-1.23519	9.21196e-06	0.000668971	Down	4.94394	6.43409	4.77724	1.90888	2.08822	2.81084		uncharacterized protein LOC101203661 [Cucumis sativus]
Csa7G390090	244.668	0.202643	-5.19816	0.481841	-1.05337	2.01272e-07	2.11214e-05	Down	25.1428	24.8751	19.3892	10.5922	9.50176	13.0922		classical arabinogalactan protein 26 [Cucumis sativus]
Csa7G394060	81.8879	0.495661	7.91817	15.1866	3.92473	2.41025e-15	8.07603e-13	Up	0.759398	1.05888	1.55179	12.9457	24.3965	12.6632		hypothetical protein Csa_015765 [Cucumis sativus]
Csa7G407550	304.644	0.308704	5.03445	2.93661	1.55415	4.7922e-07	4.71785e-05	Up	2.12071	2.22017	3.77439	6.01609	9.505	7.98533	T14P4.6	phospholipase A1 PLIP2, chloroplastic [Cucumis sativus]	GO:0009507,GO:0031969,GO:0009570,GO:0102549,GO:0052740,GO:0047714,GO:0052739,GO:0008970,GO:0002213,GO:0016042,GO:0031349	chloroplast|chloroplast membrane|chloroplast stroma|1-18:1-2-16:0-monogalactosyldiacylglycerol lipase activity|1-acyl-2-lysophosphatidylserine acylhydrolase activity|galactolipase activity|phosphatidylserine 1-acylhydrolase activity|phospholipase A1 activity|defense response to insect|lipid catabolic process|positive regulation of defense response
Csa7G450720	108.526	0.27659	-5.75716	0.331625	-1.59237	8.55422e-09	1.1425e-06	Down	9.1986	6.95247	7.42235	2.59428	2.00948	3.16734		uncharacterized protein LOC101209615 [Cucumis sativus]
CsaUNG031630	55.1576	0.423283	3.43508	2.73969	1.45401	0.000592387	0.0218839	Up	1.02402	1.55477	0.85251	4.17161	2.36708	2.74243	T11H3.120	CBL-interacting serine/threonine-protein kinase 25 [Cucumis sativus]	GO:0005524,GO:0004674,GO:0050832,GO:0007165	ATP binding|protein serine/threonine kinase activity|defense response to fungus|signal transduction
CsaUNG031640	1240.75	0.228331	11.57	6.24109	2.6418	5.84575e-31	4.29415e-28	Up	12.6916	10.3676	17.9548	80.0711	92.0748	80.3156	T6J4.2	AP2/ERF and B3 domain-containing transcription factor RAV1-like [Cucumis sativus]	GO:0005634,GO:0003677,GO:0003700,GO:0009873,GO:0048527,GO:0048366,GO:0009910,GO:0045892,GO:0009741	nucleus|DNA binding|DNA-binding transcription factor activity|ethylene-activated signaling pathway|lateral root development|leaf development|negative regulation of flower development|negative regulation of transcription, DNA-templated|response to brassinosteroid
