# Supplementary material for: Transcriptomic Responses to Chilling Reveal Potential Chilling Tolerance Mechanisms in Cucumber
Source: Int J Mol Sci. 2022 Oct 25;23(21):12834. doi: 10.3390/ijms232112834 (PMC9657649; doi:10.3390/ijms232112834)
Supplement: Supplementary file 1 [file ijms-23-12834-s001.zip › Supplementary_Table_S4.xlsx]

## Sheet: Supplementary_Table_S4
Supplementary Table S4. The DEGs up and down regulated after chilling in R1461
gene_id	BaseMean	lfcSE	stat	FoldChange	log2FoldChange	p-value	q-value	Regulation	Expression_R1461_0h_1	Expression_R1461_0h_2	Expression_R1461_0h_3	Expression_R1461_3h_1	Expression_R1461_3h_2	Expression_R1461_3h_3	gene_symbol	description	GO_id	GO_term	pathway	pathway_description
Csa2G415500	3.21898	1.64536	-3.13504	0.0280031	-5.15827	0.00171832	0.0102533	Down	0.771137	0.608292	0.080178	0	0	0	T16B24.16	MLO-like protein 12 [Cucumis sativus]	GO:0016021,GO:0005886,GO:0005516,GO:0006952,GO:0009817,GO:0010150	integral component of membrane|plasma membrane|calmodulin binding|defense response|defense response to fungus, incompatible interaction|leaf senescence
Csa1G042580	149.995	0.284272	-14.8439	0.0536713	-4.21971	7.62e-50	4.53e-47	Down	46.5036	51.4823	44.8604	4.63359	1.54942	1.97876		hypothetical protein Csa_013579 [Cucumis sativus]
Csa7G009120	17.5698	0.741216	-5.50635	0.0590714	-4.0814	3.66e-08	8.93e-07	Down	4.32765	6.47437	4.03414	0.152546	0.459087	0.3198		auxin-responsive protein SAUR24-like [Momordica charantia]	GO:0009734	auxin-activated signaling pathway	csv04075	Plant hormone signal transduction
Csa2G292230	3.10457	1.6128	-2.51697	0.0599799	-4.05938	0.0118369	0.0487008	Down	0.499392	0.134296	0.14161	0	0	0.0486456	K13E13.10	B3 domain-containing transcription factor VRN1-like [Cucumis sativus]	GO:0005654,GO:0003677,GO:0043565,GO:0009909,GO:0010048	nucleoplasm|DNA binding|sequence-specific DNA binding|regulation of flower development|vernalization response
Csa4G643080	5.67228	1.27719	-3.16348	0.0607752	-4.04037	0.00155897	0.009481	Down	0.299074	0.491494	0.276407	0.0339691	0.0340766	0		uncharacterized protein LOC101210181 [Cucumis sativus]
Csa5G165270	4.7066	1.33246	-2.8229	0.073741	-3.76139	0.00475915	0.0235003	Down	0.284786	0.280808	0.263202	0.0646924	0	0		uncharacterized protein LOC105435447 [Cucumis sativus]
Csa7G008440	60.6061	0.369551	-9.36872	0.0907338	-3.46222	7.34e-21	1.09e-18	Down	16.5772	18.7673	15.6401	2.35357	1.88882	0.657873	MCM23.13	auxin-responsive protein SAUR21 [Cucumis sativus]	GO:0005886,GO:0009734,GO:0007275,GO:0040008	plasma membrane|auxin-activated signaling pathway|multicellular organism development|regulation of growth	csv04075	Plant hormone signal transduction
Csa6G404270	58.5779	1.08499	-3.1241	0.0954163	-3.38962	0.00178349	0.0105659	Down	7.78353	6.76424	6.44684	1.82057	0.0676418	0.282715	T10O24.7	germin-like protein subfamily 1 member 1 [Cucumis sativus]	GO:0048046,GO:0005618,GO:0030145,GO:0045735	apoplast|cell wall|manganese ion binding|nutrient reservoir activity
Csa7G007930	8.88767	0.915366	-3.60608	0.101469	-3.30089	0.000310852	0.00247057	Down	0.804619	1.22613	1.52108	0.074773	0	0.31351	MBK21.21	indole-3-acetic acid-induced protein ARG7 [Cucumis sativus]	GO:0005737,GO:0009734,GO:0007275,GO:0040008	cytoplasm|auxin-activated signaling pathway|multicellular organism development|regulation of growth	csv04075	Plant hormone signal transduction
Csa5G387980	7.13031	1.05852	-3.1181	0.101491	-3.30058	0.0018202	0.0107532	Down	0.39585	1.17096	0.646769	0	0	0.242374		uncharacterized protein LOC105435499 [Cucumis sativus]
Csa5G608230	5.27973	1.16668	-2.81684	0.102497	-3.28634	0.00484982	0.023812	Down	0.935208	0.368858	1.36132	0.0955996	0.0959021	0.100208	F14K14	hypothetical protein Csa_008746 [Cucumis sativus]	GO:0048046,GO:0005576,GO:0005615,GO:0005102,GO:0050829,GO:0010227,GO:0010102,GO:0060866,GO:0045490,GO:0060305,GO:0010468,GO:0009723	apoplast|extracellular region|extracellular space|signaling receptor binding|defense response to Gram-negative bacterium|floral organ abscission|lateral root morphogenesis|leaf abscission|pectin catabolic process|regulation of cell diameter|regulation of gene expression|response to ethylene
Csa7G009100	6.834	1.04935	-3.08561	0.105998	-3.23789	0.00203137	0.0117883	Down	1.65583	0.653081	0.688652	0.0846318	0.254699	0	MRG7.3	auxin-responsive protein SAUR21 [Cucumis sativus]	GO:0005886,GO:0009734,GO:0007275,GO:0040008	plasma membrane|auxin-activated signaling pathway|multicellular organism development|regulation of growth	csv04075	Plant hormone signal transduction
Csa2G258100	162.91	0.227771	-13.8194	0.112839	-3.14766	1.95e-43	8.41e-41	Down	17.5819	22.2122	20.4228	1.75515	2.2537	3.23797	T4L20.340	auxin-responsive protein SAUR50 [Cucumis sativus]	GO:0009734,GO:0040008	auxin-activated signaling pathway|regulation of growth	csv04075	Plant hormone signal transduction
Csa6G526510	4.6695	1.22039	-2.53544	0.117097	-3.09422	0.0112306	0.0465862	Down	0.222471	0.658089	1.00235	0.0758052	0	0.158919		hypothetical protein E6C27_scaffold120G00320 [Cucumis melo var. makuwa]
Csa6G137590	62.2772	0.329612	-9.27304	0.120199	-3.05651	1.81e-20	2.59e-18	Down	9.30482	10.461	9.13207	1.4223	1.15928	1.11815	MBK21.21	auxin-responsive protein SAUR71 [Cucumis sativus]	GO:0005737,GO:0009734,GO:0007275,GO:0040008	cytoplasm|auxin-activated signaling pathway|multicellular organism development|regulation of growth	csv04075	Plant hormone signal transduction
Csa4G642550	24.6965	0.56342	-5.28079	0.127158	-2.9753	1.29e-07	2.79e-06	Down	2.21397	2.88725	4.30687	0.146012	0.878843	0.229575		uncharacterized protein LOC105435310 [Cucumis sativus]
Csa6G523440	9.42881	0.829225	-3.43341	0.138978	-2.84707	0.000596036	0.0042695	Down	0.425057	0.445315	0.441948	0	0.136213	0.0569314	Solyc08g016720.1.1	9-cis-epoxycarotenoid dioxygenase NCED2, chloroplastic [Cucumis sativus]	GO:0009507,GO:0009570,GO:0045549,GO:0010436,GO:0046872,GO:0016121	chloroplast|chloroplast stroma|9-cis-epoxycarotenoid dioxygenase activity|carotenoid dioxygenase activity|metal ion binding|carotene catabolic process	csv00906	Carotenoid biosynthesis
Csa6G524100	86.0585	0.298625	-9.38427	0.143351	-2.80238	6.34e-21	9.48e-19	Down	33.7504	26.9223	24.0515	4.07029	3.11099	5.89184		hypothetical protein Csa_003492 [Cucumis sativus]
Csa7G234150	9.08647	0.83062	-3.36928	0.143728	-2.79859	0.000753658	0.00517249	Down	1.12906	1.0478	0.966762	0.203674	0	0.284657	dl3470w	transcription repressor OFP12 [Cucumis sativus]	GO:0005634,GO:0045892	nucleus|negative regulation of transcription, DNA-templated
Csa7G008430	132.632	0.240575	-11.4982	0.146993	-2.76618	1.35e-30	3.41e-28	Down	26.6361	36.9695	36.8759	3.99543	6.53168	5.11871	T4L20.340	auxin-responsive protein SAUR50 [Cucumis sativus]	GO:0009734,GO:0040008	auxin-activated signaling pathway|regulation of growth	csv04075	Plant hormone signal transduction
Csa3G389850	5.04186	1.06879	-2.5772	0.14819	-2.75448	0.00996057	0.0422926	Down	0.529141	0.52175	0.68771	0.135226	0.0678268	0.0708721	K14B15.15	ethylene-response factor C3 [Cucumis sativus]	GO:0005634,GO:0003677,GO:0003700,GO:0006952,GO:0009873,GO:0009867	nucleus|DNA binding|DNA-binding transcription factor activity|defense response|ethylene-activated signaling pathway|jasmonic acid mediated signaling pathway	csv04016,csv04075	MAPK signaling pathway - plant|Plant hormone signal transduction
Csa3G730870	6.22097	1.04255	-2.64174	0.148223	-2.75416	0.00824808	0.0364237	Down	0.967005	0.715124	0.921646	0.411875	0	0		hypothetical protein Csa_001201 [Cucumis sativus]
Csa7G046650	6.37006	0.997952	-2.75979	0.148225	-2.75414	0.00578382	0.0273251	Down	0.540226	0.976581	1.49785	0	0.184661	0.289428		uncharacterized protein LOC101222779 [Cucumis sativus]
Csa2G334540	12.4452	0.688091	-3.97273	0.150351	-2.7336	7.11e-05	0.000699182	Down	1.0128	0.911815	0.915694	0.225068	0.135468	0.0943671	F14J22.1	U-box domain-containing protein 26 [Cucumis sativus]	GO:0061630,GO:0009814,GO:0016567	ubiquitin protein ligase activity|defense response, incompatible interaction|protein ubiquitination
Csa3G888550	16.3205	0.648585	-4.20738	0.150847	-2.72884	2.58e-05	0.000289081	Down	4.02919	4.23777	3.07215	0	1.10181	0.719549		hypothetical protein Csa_000895 [Cucumis sativus]
Csa7G432080	12.1936	0.707241	-3.79943	0.155274	-2.68711	0.00014503	0.00128599	Down	1.31303	2.13242	1.44551	0.0789536	0.396018	0.331039	F21J6.103	ethylene-responsive transcription factor ERF003 [Cucumis sativus]	GO:0005634,GO:0003677,GO:0003700,GO:0009873	nucleus|DNA binding|DNA-binding transcription factor activity|ethylene-activated signaling pathway
Csa4G556180	10.7257	0.754544	-3.50774	0.15968	-2.64674	0.000451936	0.00339059	Down	1.85213	2.30685	1.21625	0.0996471	0.299888	0.522253		hypothetical protein Csa_012431 [Cucumis sativus]	GO:0009734	auxin-activated signaling pathway	csv04075	Plant hormone signal transduction
Csa5G495960	8.06123	0.949909	-2.74117	0.164497	-2.60386	0.00612207	0.0286314	Down	0.21489	0.370805	1.67572	0.16475	0.165271	0.0575639	F21M12.36	uncharacterized protein LOC105435687 [Cucumis sativus]	GO:0016021,GO:0005886,GO:0009506,GO:0005524,GO:0042802,GO:0001653,GO:0004672,GO:0004674,GO:0045087,GO:0046777,GO:0006979,GO:0009845	integral component of membrane|plasma membrane|plasmodesma|ATP binding|identical protein binding|peptide receptor activity|protein kinase activity|protein serine/threonine kinase activity|innate immune response|protein autophosphorylation|response to oxidative stress|seed germination
Csa4G377160	106.38	0.318669	-8.10899	0.166768	-2.58408	5.1e-16	4.62e-14	Down	2.83035	3.78626	3.24272	1.03199	0.221841	0.502236		uncharacterized protein LOC101216001 isoform X1 [Cucumis sativus]	GO:0020037,GO:0030151,GO:0043546,GO:0009703,GO:0050464,GO:0042128,GO:0006809	heme binding|molybdenum ion binding|molybdopterin cofactor binding|nitrate reductase (NADH) activity|nitrate reductase (NADPH) activity|nitrate assimilation|nitric oxide biosynthetic process	csv00910	Nitrogen metabolism
Csa7G190690	125.398	0.233217	-10.9853	0.169346	-2.56195	4.5e-28	1.02e-25	Down	13.7963	13.9156	12.7653	1.87608	2.46609	2.98368	T19K4.170	Chaperone protein dnaJ 11 [Cucumis melo var. makuwa]	GO:0009507,GO:0009570,GO:0005634,GO:0009536	chloroplast|chloroplast stroma|nucleus|plastid
Csa3G901170	28.7222	0.476251	-5.31793	0.172818	-2.53267	1.05e-07	2.31e-06	Down	1.7759	1.12974	1.25083	0.380643	0.117491	0.276225	T6K21.100	RING-H2 finger protein ATL29 [Cucumis sativus]	GO:0016021,GO:0046872,GO:0016740,GO:0016567	integral component of membrane|metal ion binding|transferase activity|protein ubiquitination
Csa4G308490	231.419	0.21439	-11.7851	0.173546	-2.52661	4.66e-32	1.34e-29	Down	9.95685	11.3918	10.5776	2.95941	1.5815	1.36259	MRO11.2	BAHD acyltransferase DCR [Cucumis sativus]	GO:0005737,GO:0005829,GO:0016747,GO:0010143,GO:0051179,GO:0090626,GO:0010090	cytoplasm|cytosol|transferase activity, transferring acyl groups other than amino-acyl groups|cutin biosynthetic process|localization|plant epidermis morphogenesis|trichome morphogenesis
Csa6G507480	7.60659	0.877558	-2.83471	0.1783	-2.48762	0.00458668	0.0228265	Down	0.724975	0.549884	0.869751	0.0570069	0.0571873	0.298775		uncharacterized protein LOC101217795 [Cucumis sativus]
Csa2G047810	114.525	0.242851	-10.0665	0.183689	-2.44466	7.77e-24	1.41e-21	Down	5.047	6.63534	7.87134	1.34139	1.24212	1.22579	F17I23.260	RING-H2 finger protein ATL13 [Cucumis sativus]	GO:0016021,GO:0046872,GO:0016740,GO:0031625,GO:0016567,GO:0080167	integral component of membrane|metal ion binding|transferase activity|ubiquitin protein ligase binding|protein ubiquitination|response to karrikin
Csa3G000130	12.6699	0.718628	-3.38844	0.18492	-2.43503	0.000702909	0.00489487	Down	2.7099	2.25014	4.15223	0.145796	0.292516	1.37542		hypothetical protein CSA_023382 [Cucumis sativus]
Csa4G331590	638.592	0.120894	-19.9882	0.187316	-2.41645	6.98e-89	8.84e-86	Down	30.0663	30.7661	30.346	5.89153	5.91017	6.4189	T20L15.90	CBL-interacting serine/threonine-protein kinase 14 [Cucumis sativus]	GO:0005737,GO:0005634,GO:0009506,GO:0005773,GO:0005524,GO:0019900,GO:0004674,GO:0009737,GO:0009409,GO:0009749,GO:0009408,GO:0006979,GO:0009651,GO:0009414,GO:0007165	cytoplasm|nucleus|plasmodesma|vacuole|ATP binding|kinase binding|protein serine/threonine kinase activity|response to abscisic acid|response to cold|response to glucose|response to heat|response to oxidative stress|response to salt stress|response to water deprivation|signal transduction
Csa6G410040	11.0308	0.714537	-3.29995	0.19507	-2.35793	0.00096703	0.00636793	Down	0.405067	0.726198	0.918902	0.0752856	0.18881	0.157829	F15K9.21	PREDICTED: protein FANTASTIC FOUR 2-like [Cucumis melo]	GO:0010075	regulation of meristem growth
Csa3G844930	7.89836	0.826828	-2.83176	0.197321	-2.34138	0.0046292	0.022996	Down	1.31565	1.18917	1.82391	0.448299	0.112429	0.352432	T23E23.18	probable serine/threonine-protein kinase PBL28 [Cucumis sativus]
Csa2G416770	6.70133	0.890615	-2.56166	0.205691	-2.28145	0.0104174	0.0438931	Down	0.240037	0.33812	0.570458	0.0701063	0.105492	0.0734859	T26B15.7	mitogen-activated protein kinase kinase kinase 18 [Cucumis sativus]	GO:0005737,GO:0005634,GO:0005524,GO:0004709,GO:0004674,GO:0009738,GO:0032147,GO:0009737,GO:0006970,GO:0023014,GO:0031098	cytoplasm|nucleus|ATP binding|MAP kinase kinase kinase activity|protein serine/threonine kinase activity|abscisic acid-activated signaling pathway|activation of protein kinase activity|response to abscisic acid|response to osmotic stress|signal transduction by protein phosphorylation|stress-activated protein kinase signaling cascade	csv04016	MAPK signaling pathway - plant
Csa6G038510	148.395	0.211255	-10.7757	0.206409	-2.27642	4.48e-27	9.58e-25	Down	21.9149	24.8065	25.6467	6.73064	4.13178	5.05439		uncharacterized protein LOC101204892 [Cucumis sativus]
Csa2G000800	9.40694	0.757629	-2.97655	0.20948	-2.25512	0.00291516	0.0158479	Down	0.341899	0.337124	0.651724	0.1165	0.116868	0.0610578	F19B15.170	protein DETOXIFICATION 52 [Cucumis sativus]	GO:0010008,GO:0016021,GO:0005770,GO:0031902,GO:0015297,GO:0015238,GO:0010252,GO:0006952,GO:0006855,GO:0031348,GO:0046620,GO:0010015	endosome membrane|integral component of membrane|late endosome|late endosome membrane|antiporter activity|drug transmembrane transporter activity|auxin homeostasis|defense response|drug transmembrane transport|negative regulation of defense response|regulation of organ growth|root morphogenesis
Csa5G169040	10.2971	0.726303	-3.10236	0.20975	-2.25326	0.00191982	0.0112612	Down	0.430929	0.934802	0.851302	0.220254	0.176761	0.0923485	Solyc07g008630.1.1	hypothetical protein Csa_000332 [Cucumis sativus]	GO:0016021,GO:0005886,GO:0050832	integral component of membrane|plasma membrane|defense response to fungus
Csa2G020970	17.4079	0.604113	-3.67299	0.214805	-2.2189	0.000239726	0.00197206	Down	1.37025	0.656254	1.30258	0.480243	0.160588	0.125848	T22H22.20	GDSL esterase/lipase At1g54790 [Cucumis sativus]	GO:0005576,GO:0016788,GO:0016042	extracellular region|hydrolase activity, acting on ester bonds|lipid catabolic process
Csa3G860310	7.28639	0.873641	-2.51134	0.218543	-2.19401	0.0120272	0.0493098	Down	2.5117	1.03192	3.91727	0.641883	0.643914	0.44855		magnesium transporter MRS2-2-like isoform X3 [Cucurbita pepo subsp. pepo]
Csa1G569340	19.8895	0.52241	-4.17324	0.220654	-2.18014	3e-05	0.000331329	Down	1.41298	1.82863	1.05593	0.270822	0.316959	0.425815	T12C22.2	probable purine permease 11 [Cucumis sativus]	GO:0016021,GO:0016020,GO:0005345,GO:0006863	integral component of membrane|membrane|purine nucleobase transmembrane transporter activity|purine nucleobase transport
Csa1G418800	110.348	0.242611	-8.94805	0.222073	-2.17089	3.62e-19	4.59e-17	Down	9.8674	13.4129	14.9496	3.09807	3.39698	2.4922	MRI1.4	protein GLUTAMINE DUMPER 1 [Cucumis sativus]	GO:0016021,GO:0006865,GO:0019048,GO:0080143,GO:0009615,GO:0032940	integral component of membrane|amino acid transport|modulation by virus of host morphology or physiology|regulation of amino acid export|response to virus|secretion by cell
Csa4G641590	29.7655	0.467741	-4.5702	0.227247	-2.13767	4.87e-06	6.84e-05	Down	5.31322	3.84193	3.59083	1.71992	0.998893	0.379542	F11C1.100	ethylene-responsive transcription factor ERF011 [Cucumis sativus]	GO:0005634,GO:0003677,GO:0003700,GO:0042742,GO:0009873,GO:0010941,GO:0009617,GO:0010200,GO:0009409	nucleus|DNA binding|DNA-binding transcription factor activity|defense response to bacterium|ethylene-activated signaling pathway|regulation of cell death|response to bacterium|response to chitin|response to cold
Csa3G837040	15.7963	0.606626	-3.50818	0.22875	-2.12816	0.000451178	0.00338624	Down	1.70595	0.663996	1.0269	0.321239	0.27622	0.240518		uncharacterized protein LOC105435007 [Cucumis sativus]
Csa6G237600	668.91	0.146928	-14.4721	0.229035	-2.12636	1.82e-47	9.1e-45	Down	35.5378	36.6704	37.4408	11.5807	7.88324	7.33398	Niben101Scf03191g04002	probable aspartic proteinase GIP2 [Cucumis sativus]
Csa4G289620	11.1558	0.704844	-2.98504	0.232615	-2.10399	0.00283543	0.0154853	Down	0.246057	0.404367	0.469031	0.146724	0.105134	0.021971	OSJNBb0005B05.7	hypothetical protein Csa_018107 [Cucumis sativus]	GO:0016021,GO:0005886,GO:0005524,GO:0030246,GO:0004674,GO:0006952,GO:0006468	integral component of membrane|plasma membrane|ATP binding|carbohydrate binding|protein serine/threonine kinase activity|defense response|protein phosphorylation
Csa3G146590	9.47587	0.751456	-2.79426	0.233297	-2.09976	0.00520194	0.0251767	Down	2.83535	1.3243	2.63771	0.762731	0.612116	0.3198	dl3135c	LOW QUALITY PROTEIN: pentatricopeptide repeat-containing protein At4g14820, partial [Cucumis sativus]
Csa5G182670	11.8714	0.695047	-2.95009	0.241409	-2.05045	0.00317686	0.0170051	Down	1.39579	0.770726	0.986856	0.0570727	0.34352	0.418768		PREDICTED: uncharacterized protein LOC103500229 [Cucumis melo]
Csa2G238760	119.959	0.245507	-8.33393	0.242148	-2.04604	7.82e-17	7.99e-15	Down	5.89174	8.43306	7.70673	1.39882	2.53364	1.71063	K13E13.2	RING-H2 finger protein ATL65 [Cucumis sativus]	GO:0016021,GO:0046872,GO:0016740,GO:0031625,GO:0016567	integral component of membrane|metal ion binding|transferase activity|ubiquitin protein ligase binding|protein ubiquitination
Csa2G258630	52.988	0.330556	-6.14475	0.244654	-2.03118	8.01e-10	2.91e-08	Down	4.5197	4.30111	4.53537	1.45052	1.34732	0.67575		hypothetical protein Csa_005975 [Cucumis sativus]	GO:0009734	auxin-activated signaling pathway
Csa6G124140	11.7136	0.768467	-2.64186	0.244824	-2.03018	0.00824526	0.0364198	Down	1.55969	3.0758	5.22536	0.354301	0.177711	2.04259		putative cell wall protein [Cucumis melo var. makuwa]
Csa3G846050	24.6665	0.475724	-4.25419	0.245907	-2.02382	2.1e-05	0.000243659	Down	1.7758	1.47243	1.51067	0.6601	0.372481	0.216225	F20D21.2	hypothetical protein Csa_002199 [Cucumis sativus]	GO:0005886,GO:0060918,GO:0009734,GO:0010929	plasma membrane|auxin transport|auxin-activated signaling pathway|positive regulation of auxin mediated signaling pathway
Csa5G140480	142.147	0.697556	-2.88373	0.248004	-2.01156	0.00392994	0.0201955	Down	7.38927	5.4502	6.86622	3.56859	0.686145	1.02867	GSVIVT00026920001	probable polygalacturonase [Cucumis sativus]	GO:0016021,GO:0004650,GO:0005975	integral component of membrane|polygalacturonase activity|carbohydrate metabolic process
Csa6G076840	10.5211	0.758819	-2.63802	0.249692	-2.00178	0.00833925	0.036724	Down	1.26481	1.24714	0.358656	0.470154	0.176866	0.123205	F4L23.7	LOB domain-containing protein 18 [Cucumis sativus]	GO:0005634,GO:0010311,GO:0045893,GO:0010089	nucleus|lateral root formation|positive regulation of transcription, DNA-templated|xylem development
Csa1G022530	1292.99	0.140274	-14.2419	0.250386	-1.99778	5.03e-46	2.39e-43	Down	99.3585	85.7816	74.223	20.8309	25.6127	23.0105		hypothetical protein Csa_013978 [Cucumis sativus]
Csa6G487700	108.891	0.247509	-7.94293	0.255971	-1.96595	1.97e-15	1.68e-13	Down	4.53629	8.00037	6.71055	1.62111	1.70188	1.89684	F18O14.2	probable galacturonosyltransferase-like 1 [Cucumis sativus]	GO:0005783,GO:0005789,GO:0005794,GO:0016021,GO:0047262,GO:0052386,GO:0010417,GO:0048366,GO:0032504,GO:0045489,GO:0010051	endoplasmic reticulum|endoplasmic reticulum membrane|Golgi apparatus|integral component of membrane|polygalacturonate 4-alpha-galacturonosyltransferase activity|cell wall thickening|glucuronoxylan biosynthetic process|leaf development|multicellular organism reproduction|pectin biosynthetic process|xylem and phloem pattern formation
Csa3G357110	49.6814	0.322967	-6.08493	0.256098	-1.96523	1.17e-09	4.12e-08	Down	3.25849	4.11072	3.98586	0.881714	1.08106	1.1296	T13J8.60	ethylene-responsive transcription factor CRF4 [Cucumis sativus]	GO:0005737,GO:0005634,GO:0003677,GO:0003700,GO:0009736,GO:0009873,GO:0048366	cytoplasm|nucleus|DNA binding|DNA-binding transcription factor activity|cytokinin-activated signaling pathway|ethylene-activated signaling pathway|leaf development
Csa1G004160	14.0536	0.662718	-2.92146	0.261322	-1.9361	0.00348401	0.0183373	Down	0.482899	1.72606	1.88283	0.617041	0.185698	0.323393		uncharacterized protein LOC116402050 [Cucumis sativus]
Csa3G120440	116.103	0.242168	-7.95131	0.263239	-1.92555	1.85e-15	1.59e-13	Down	4.1644	6.18601	4.55481	1.07806	1.69154	1.39081	F17K4_200	pentatricopeptide repeat-containing protein At5g18950 isoform X1 [Cucumis sativus]
Csa4G006310	98.2086	0.255744	-7.50853	0.264207	-1.92026	5.98e-14	4.16e-12	Down	7.53661	9.83224	9.64443	2.72608	3.15086	1.67722		uncharacterized protein LOC101211300 [Cucumis sativus]
Csa2G416230	15.4365	0.612735	-3.13146	0.264483	-1.91875	0.00173941	0.0103499	Down	3.705	5.8452	4.04484	2.46178	0.379934	0.992481	T26B15.18	cellulose synthase-like protein H1 [Cucumis sativus]	GO:0005794,GO:0000139,GO:0016021,GO:0005886,GO:0005802,GO:0016760,GO:0016759,GO:0071555,GO:0030244,GO:0009833	Golgi apparatus|Golgi membrane|integral component of membrane|plasma membrane|trans-Golgi network|cellulose synthase (UDP-forming) activity|cellulose synthase activity|cell wall organization|cellulose biosynthetic process|plant-type primary cell wall biogenesis
Csa1G638510	153.22	0.236059	-8.10939	0.265301	-1.9143	5.09e-16	4.62e-14	Down	6.3924	5.64603	5.77392	2.49774	1.29079	1.2694		uncharacterized protein LOC101222078 [Cucumis sativus]
Csa1G439830	145.616	0.2202	-8.64159	0.267409	-1.90288	5.54e-18	6.27e-16	Down	9.28762	9.38876	8.07429	3.43063	2.00086	2.21614	GA2OX1	gibberellin 2-beta-dioxygenase-like [Cucumis sativus]	GO:0045543,GO:0046872,GO:0009686	gibberellin 2-beta-dioxygenase activity|metal ion binding|gibberellin biosynthetic process	csv00904	Diterpenoid biosynthesis
Csa2G372860	8.46748	0.758136	-2.50536	0.268053	-1.89941	0.0122325	0.0499271	Down	1.18506	2.22016	1.35536	0.484559	0.486092	0.380938		hypothetical protein Csa_022208 [Cucumis sativus]
Csa3G717370	15.377	0.580231	-3.2699	0.268446	-1.89729	0.00107587	0.00697592	Down	0.821695	1.02343	1.304	0.397875	0.133045	0.370716	CCR1	cinnamoyl-CoA reductase 8 [Cucumis sativus]			csv00940	Phenylpropanoid biosynthesis
Csa6G217470	64.894	0.311293	-6.05632	0.27069	-1.88529	1.39e-09	4.86e-08	Down	7.69686	6.83041	6.76593	2.64649	2.36785	1.12462		uncharacterized protein LOC101207122 [Cucumis sativus]
Csa7G394580	11.3834	0.675118	-2.78377	0.271802	-1.87937	0.00537305	0.0258208	Down	2.3471	2.31432	3.7419	1.27961	0.802288	0.335324	T20O10.50	PREDICTED: glutaredoxin-C11 [Cucumis melo]	GO:0005737,GO:0009055,GO:0015035,GO:0045454,GO:0000122	cytoplasm|electron transfer activity|protein disulfide oxidoreductase activity|cell redox homeostasis|negative regulation of transcription by RNA polymerase II
Csa7G073480	129.539	0.245655	-7.61592	0.273404	-1.87089	2.62e-14	1.91e-12	Down	7.89785	6.04642	5.44108	2.49422	1.67905	1.51363	TOGT1	scopoletin glucosyltransferase [Cucumis sativus]	GO:0042802,GO:0050275	identical protein binding|scopoletin glucosyltransferase activity	csv00999	Biosynthesis of various plant secondary metabolites
Csa1G597720	2867.73	0.120319	-15.4523	0.275629	-1.8592	7.28e-54	5.12e-51	Down	216.759	220.364	189.235	62.5095	68.7912	52.7586	T1M15.100	FCS-Like Zinc finger 14 [Cucumis sativus]	GO:0005737,GO:0005634,GO:0046872,GO:0009749,GO:1905582,GO:0042594,GO:0009744	cytoplasm|nucleus|metal ion binding|response to glucose|response to mannose|response to starvation|response to sucrose
Csa6G421060	87.9995	0.255427	-7.24162	0.277449	-1.84971	4.43e-13	2.7e-11	Down	10.8613	9.39679	8.45146	2.79359	2.58686	3.1535		hypothetical protein Csa_003269 [Cucumis sativus]
Csa6G104650	1303.95	0.12632	-14.6293	0.277781	-1.84798	1.83e-48	9.92e-46	Down	65.7191	65.8775	63.9578	22.7762	19.4572	15.7211	F17I23.240	WAT1-related protein At4g30420 [Cucumis sativus]	GO:0016021,GO:0005886,GO:0022857	integral component of membrane|plasma membrane|transmembrane transporter activity
Csa5G606580	15.6386	0.574061	-3.20746	0.279074	-1.84128	0.0013391	0.00834132	Down	3.89025	2.60294	3.61147	1.56228	0.712377	0.744361	T1K7.3	hypothetical protein Csa_008419 [Cucumis sativus]	GO:0048046,GO:0005615,GO:0045168,GO:0007275	apoplast|extracellular space|cell-cell signaling involved in cell fate commitment|multicellular organism development
Csa7G434970	2096.4	0.291632	-6.26579	0.281791	-1.8273	3.71e-10	1.42e-08	Down	135.481	133.547	137.187	51.1264	45.0158	25.9038	LE	gibberellin 3-beta-dioxygenase 1 [Cucumis sativus]			csv00904	Diterpenoid biosynthesis
Csa5G290170	11.8819	0.701764	-2.59795	0.282603	-1.82315	0.00937813	0.0403183	Down	1.1288	0.445213	0.469462	0.230778	0.0771695	0.322537		uncharacterized protein LOC101206442 [Cucumis sativus]
Csa4G165850	42.5905	0.373661	-4.86556	0.2836	-1.81807	1.14e-06	1.93e-05	Down	4.13632	3.36205	3.54516	1.7713	0.745154	0.838503		DTW domain-containing protein 2 [Cucumis sativus]
Csa2G000960	855.589	0.166204	-10.9293	0.283911	-1.81649	8.35e-28	1.87e-25	Down	75.3616	68.2364	70.9981	29.7654	18.9462	16.4974		uncharacterized protein LOC101210555 [Cucumis sativus]
Csa4G658480	52.1208	0.314902	-5.7552	0.284732	-1.81232	8.65e-09	2.45e-07	Down	3.00935	3.52122	3.21238	1.2305	0.946367	0.773888		uncharacterized protein LOC101216667 [Cucumis sativus]
Csa4G046600	61.609	0.299081	-6.05216	0.285173	-1.81009	1.43e-09	4.97e-08	Down	4.805	4.78723	4.73573	1.89309	0.975204	1.50167		uncharacterized protein LOC105435182 [Cucumis sativus]
Csa3G149380	105.485	0.239077	-7.57028	0.285214	-1.80988	3.72e-14	2.67e-12	Down	5.4792	5.76771	6.9287	1.40025	1.89822	2.22146	F7K24.10	protein FANTASTIC FOUR 3 [Cucumis sativus]
Csa1G364460	32.9552	0.389041	-4.64717	0.285599	-1.80794	3.37e-06	4.98e-05	Down	2.67424	2.7951	2.7249	1.09347	0.65816	0.74502	F15N18.180	ethylene-responsive transcription factor TINY [Cucumis sativus]	GO:0005634,GO:0003700,GO:0043565,GO:0009873,GO:0045893	nucleus|DNA-binding transcription factor activity|sequence-specific DNA binding|ethylene-activated signaling pathway|positive regulation of transcription, DNA-templated
Csa1G132110	386.949	0.141324	-12.7606	0.286502	-1.80338	2.72e-37	8.76e-35	Down	27.0002	24.3691	25.9654	8.15666	7.34212	8.18014		uncharacterized protein LOC101217269 [Cucumis sativus]
Csa2G048330	12.4537	0.631771	-2.84766	0.28736	-1.79907	0.00440421	0.022057	Down	0.639342	0.472809	0.415468	0.136157	0.218541	0.114176	4CL1	4-coumarate--CoA ligase 1 [Cucumis sativus]	GO:0016207,GO:0005524,GO:0009698	4-coumarate-CoA ligase activity|ATP binding|phenylpropanoid metabolic process	csv00130,csv00940	Ubiquinone and other terpenoid-quinone biosynthesis|Phenylpropanoid biosynthesis
Csa5G175820	32.1211	0.401804	-4.47536	0.287529	-1.79822	7.63e-06	0.00010191	Down	2.02414	1.46866	2.184	0.702725	0.50913	0.531989	MAA21_70	cytokinin dehydrogenase 6 [Cucumis sativus]	GO:0005615,GO:0019139,GO:0071949,GO:0009690,GO:0010103	extracellular space|cytokinin dehydrogenase activity|FAD binding|cytokinin metabolic process|stomatal complex morphogenesis	csv00908	Zeatin biosynthesis
Csa3G176350	14.5652	0.624504	-2.87374	0.28824	-1.79466	0.00405648	0.0207217	Down	0.616999	1.82514	1.39967	0.401363	0.172557	0.601015		uncharacterized protein LOC101217454 [Cucumis sativus]
Csa5G173520	432.705	0.138637	-12.9095	0.289227	-1.78973	3.98e-38	1.3e-35	Down	27.0069	33.1832	33.9686	11.0046	9.02353	8.92714	MSG15.23	F-box protein PP2-A14 [Cucumis sativus]	GO:0005634,GO:0030246,GO:0016567	nucleus|carbohydrate binding|protein ubiquitination
Csa2G354750	29.8377	0.410642	-4.3534	0.289636	-1.78769	1.34e-05	0.00016623	Down	1.43285	1.47855	1.69766	0.442815	0.341705	0.642685	MNL12.1	F-box/kelch-repeat protein At5g43190 [Cucumis sativus]	GO:0004842,GO:0031146	ubiquitin-protein transferase activity|SCF-dependent proteasomal ubiquitin-dependent protein catabolic process
Csa1G541380	70.4103	0.306506	-5.82846	0.289883	-1.78646	5.59e-09	1.66e-07	Down	9.69737	6.32972	6.03543	2.65275	1.75076	2.48793	T17H7.1	berberine bridge enzyme-like 18 [Cucumis sativus]	GO:0005618,GO:0005576,GO:0045551,GO:0050268,GO:0071949,GO:0052747	cell wall|extracellular region|cinnamyl-alcohol dehydrogenase activity|coniferyl-alcohol dehydrogenase activity|FAD binding|sinapyl alcohol dehydrogenase activity
Csa3G303630	32.2534	0.407676	-4.34766	0.292714	-1.77243	1.38e-05	0.000169424	Down	2.93374	3.00402	2.46372	1.32646	0.636401	0.664974	T6J19.5	transcription factor MYB20 [Cucumis sativus]	GO:0005634,GO:0003700,GO:0001158,GO:0043565,GO:0044212,GO:0030154,GO:0045892,GO:1901002,GO:2000652	nucleus|DNA-binding transcription factor activity|enhancer sequence-specific DNA binding|sequence-specific DNA binding|transcription regulatory region DNA binding|cell differentiation|negative regulation of transcription, DNA-templated|positive regulation of response to salt stress|regulation of secondary cell wall biogenesis
Csa3G735030	722.217	0.157609	-11.2379	0.292966	-1.77119	2.66e-29	6.31e-27	Down	30.0968	26.5983	22.4723	10.2553	6.84219	7.78773	T26I12.30	exocyst complex component EXO70H1 [Cucumis sativus]	GO:0005829,GO:0012505,GO:0000145,GO:0016020,GO:0005634,GO:0045335,GO:0031982,GO:0006952,GO:0006887,GO:1900426,GO:0009617,GO:0009620,GO:0002237	cytosol|endomembrane system|exocyst|membrane|nucleus|phagocytic vesicle|vesicle|defense response|exocytosis|positive regulation of defense response to bacterium|response to bacterium|response to fungus|response to molecule of bacterial origin
Csa1G264520	38.1009	0.380316	-4.65002	0.293518	-1.76848	3.32e-06	4.92e-05	Down	4.21141	3.7533	6.31553	1.57299	1.74407	1.12814		PREDICTED: uncharacterized protein LOC103487396 [Cucumis melo]
Csa5G597510	450.243	0.141938	-12.3914	0.295492	-1.75881	2.91e-35	8.78e-33	Down	8.6148	9.57887	9.01159	3.02465	3.18191	2.34277	T26I12.150	protein-tyrosine-phosphatase MKP1 [Cucumis sativus]	GO:0005829,GO:0017017,GO:0004725,GO:0006952,GO:1902065,GO:0009651,GO:0010224,GO:0010225	cytosol|MAP kinase tyrosine/serine/threonine phosphatase activity|protein tyrosine phosphatase activity|defense response|response to L-glutamate|response to salt stress|response to UV-B|response to UV-C
Csa3G175640	168.247	0.187187	-9.39528	0.29552	-1.75867	5.71e-21	8.75e-19	Down	24.8658	27.5571	30.163	8.03835	9.4804	8.42584		hypothetical protein Csa_009618 [Cucumis sativus]
Csa5G160120	14.8072	0.672184	-2.61214	0.296101	-1.75584	0.0089977	0.0390092	Down	0.917214	1.11974	0.953662	0.669715	0	0.2808	ODO1	protein ODORANT1 [Cucumis sativus]
Csa6G128040	1523.26	0.102173	-17.1597	0.296633	-1.75325	5.32e-66	4.6e-63	Down	87.4451	87.8299	84.2992	30.0486	25.2842	26.8955	RMA1H1	E3 ubiquitin-protein ligase RMA1H1 [Cucumis sativus]	GO:0005789,GO:0016021,GO:0046872,GO:0004842,GO:0043161,GO:0016567,GO:0009409,GO:0009723,GO:0006970,GO:0009414,GO:0009611	endoplasmic reticulum membrane|integral component of membrane|metal ion binding|ubiquitin-protein transferase activity|proteasome-mediated ubiquitin-dependent protein catabolic process|protein ubiquitination|response to cold|response to ethylene|response to osmotic stress|response to water deprivation|response to wounding	csv04141	Protein processing in endoplasmic reticulum
Csa3G769110	2936.76	0.1259	-13.8763	0.297915	-1.74703	8.82e-44	3.9e-41	Down	175.904	164.573	144.676	61.128	48.4	45.1725	F14J16.18	serine acetyltransferase 1, chloroplastic [Cucumis sativus]	GO:0009507,GO:0005829,GO:0005634,GO:0009001,GO:0009970,GO:0006535,GO:0009409	chloroplast|cytosol|nucleus|serine O-acetyltransferase activity|cellular response to sulfate starvation|cysteine biosynthetic process from serine|response to cold	csv00270,csv00920	Cysteine and methionine metabolism|Sulfur metabolism
Csa3G363150	223.651	0.188813	-9.22587	0.298963	-1.74196	2.81e-20	3.93e-18	Down	16.185	13.8176	11.9289	4.27233	4.03374	5.13685	MXC20.13	probable membrane-associated kinase regulator 6 [Cucumis sativus]	GO:0005886,GO:0009738	plasma membrane|abscisic acid-activated signaling pathway
Csa7G354520	505.616	0.129514	-13.4343	0.299386	-1.73992	3.81e-41	1.37e-38	Down	22.7184	25.984	27.5694	9.13542	7.28447	7.89214	MJL12.21	serine/threonine-protein kinase OXI1 [Cucumis sativus]	GO:0005737,GO:0005634,GO:0005886,GO:0005524,GO:0016301,GO:0004672,GO:0019901,GO:0004674,GO:0006952,GO:0006468,GO:0006979,GO:0009611	cytoplasm|nucleus|plasma membrane|ATP binding|kinase activity|protein kinase activity|protein kinase binding|protein serine/threonine kinase activity|defense response|protein phosphorylation|response to oxidative stress|response to wounding	csv04016	MAPK signaling pathway - plant
Csa4G051470	54.6808	0.319185	-5.41738	0.30163	-1.72915	6.05e-08	1.41e-06	Down	3.42268	3.41366	3.02693	1.48798	0.927886	0.758776	F2P3.16	probable WRKY transcription factor 41 [Cucumis sativus]	GO:0005634,GO:0003700,GO:0043565,GO:0044212	nucleus|DNA-binding transcription factor activity|sequence-specific DNA binding|transcription regulatory region DNA binding
Csa3G112250	63.4876	0.352071	-4.90341	0.302216	-1.72635	9.42e-07	1.61e-05	Down	2.53772	1.69013	2.22195	1.18329	0.388068	0.524754	F23H11.6	protein NRT1/ PTR FAMILY 4.3 [Cucumis sativus]	GO:0016021,GO:0005886,GO:0035673,GO:1904680,GO:0015333,GO:0009624	integral component of membrane|plasma membrane|oligopeptide transmembrane transporter activity|peptide transmembrane transporter activity|peptide:proton symporter activity|response to nematode
Csa6G495740	799.097	0.425856	-4.04956	0.302597	-1.72453	5.13e-05	0.000527884	Down	93.5215	89.1535	87.7831	48.1402	20.6968	19.0119	F19F18.160	probable amino-acid acetyltransferase NAGS2, chloroplastic isoform X1 [Cucumis sativus]	GO:0009507,GO:0004042,GO:0103045,GO:0006526	chloroplast|acetyl-CoA:L-glutamate N-acetyltransferase activity|methione N-acyltransferase activity|arginine biosynthetic process	csv00220	Arginine biosynthesis
Csa5G434550	208.63	0.192258	-8.96329	0.302863	-1.72326	3.15e-19	4.02e-17	Down	25.9164	25.1551	26.3568	10.0175	9.05255	5.90103	OsI_37415	two-component response regulator ORR10 [Cucumis sativus]	GO:0005634,GO:0009736,GO:0000160	nucleus|cytokinin-activated signaling pathway|phosphorelay signal transduction system	csv04075	Plant hormone signal transduction
Csa1G045990	17.9004	0.538691	-3.14874	0.308599	-1.6962	0.00163977	0.00989011	Down	0.450633	0.96709	0.771713	0.298067	0.271828	0.142016	T13D8.8	U-box domain-containing protein 19 [Cucumis sativus]	GO:0005737,GO:0005634,GO:0004842,GO:0010029	cytoplasm|nucleus|ubiquitin-protein transferase activity|regulation of seed germination
Csa3G633290	758.658	0.116993	-14.4978	0.30861	-1.69614	1.25e-47	6.43e-45	Down	43.0799	42.7794	46.3801	14.2107	15.6264	13.6271	MWE13.5	ninja-family protein AFP3 [Cucumis sativus]	GO:0005634,GO:0045892,GO:0007165	nucleus|negative regulation of transcription, DNA-templated|signal transduction
Csa2G047830	15.7738	0.58735	-2.8741	0.310334	-1.68811	0.00405176	0.0207168	Down	0.397498	0.96205	1.27745	0.369394	0.259395	0.232321	MUA2.5	AAA-ATPase At5g57480 [Cucumis sativus]	GO:0005524,GO:0016887	ATP binding|ATPase activity
Csa1G033080	198.239	0.170518	-9.89771	0.310413	-1.68774	4.26e-23	7.29e-21	Down	7.63147	8.20185	8.04455	2.8613	2.41002	2.6314	T17M13.12	protein PHYTOCHROME KINASE SUBSTRATE 1 [Cucumis sativus]	GO:0005737,GO:0005886,GO:0009638,GO:0009958,GO:0010017,GO:0009585,GO:0010218,GO:0010114	cytoplasm|plasma membrane|phototropism|positive gravitropism|red or far-red light signaling pathway|red, far-red light phototransduction|response to far red light|response to red light
Csa5G146260	654.86	0.128472	-13.1316	0.310563	-1.68704	2.17e-39	7.5e-37	Down	68.1008	64.6836	58.139	21.8938	19.1355	22.3995	MNJ7.20	RING-H2 finger protein ATL79 [Cucumis sativus]	GO:0016021,GO:0046872,GO:0016740,GO:0016567	integral component of membrane|metal ion binding|transferase activity|protein ubiquitination
Csa1G073660	12.2336	0.641205	-2.61014	0.313462	-1.67364	0.00905041	0.0391663	Down	2.24658	1.73363	1.42182	0.998484	0.400658	0.418647		hypothetical protein Csa_013881 [Cucumis sativus]			csv00601,csv00603	Glycosphingolipid biosynthesis - lacto and neolacto series|Glycosphingolipid biosynthesis - globo and isoglobo series
Csa6G148300	135.149	0.221373	-7.53777	0.314545	-1.66866	4.78e-14	3.37e-12	Down	10.6298	10.4814	10.5694	4.80008	3.06907	2.76454	T3B23.13	PREDICTED: zinc finger protein ZAT5-like [Cucumis melo]	GO:0005634,GO:0003700,GO:0046872,GO:0043565,GO:0006355	nucleus|DNA-binding transcription factor activity|metal ion binding|sequence-specific DNA binding|regulation of transcription, DNA-templated
Csa6G040600	20.395	0.513017	-3.24973	0.314871	-1.66717	0.00115515	0.00738418	Down	1.10235	0.573669	1.14615	0.43822	0.251204	0.262483	NSP2	protein NODULATION SIGNALING PATHWAY 2 [Cucumis sativus]
Csa2G009440	3391.06	0.1214	-13.6975	0.315809	-1.66288	1.05e-42	4.34e-40	Down	149.524	166.893	172.817	68.462	47.3366	48.986		uncharacterized protein LOC101209679 [Cucumis sativus]
Csa4G639930	47.8453	0.368001	-4.51139	0.316396	-1.66019	6.44e-06	8.73e-05	Down	1.8688	3.25413	3.59673	1.50388	0.733935	0.681678	F2G19.8	heat stress transcription factor B-4 [Cucumis sativus]	GO:0005737,GO:0005634,GO:0003700,GO:0000978,GO:0043565,GO:0008356,GO:0034605,GO:0061408	cytoplasm|nucleus|DNA-binding transcription factor activity|RNA polymerase II proximal promoter sequence-specific DNA binding|sequence-specific DNA binding|asymmetric cell division|cellular response to heat|positive regulation of transcription from RNA polymerase II promoter in response to heat stress
Csa3G848850	20.0005	0.610514	-2.71585	0.316864	-1.65806	0.00661057	0.0304294	Down	0.394053	0.75767	0.655538	0.463233	0.0404086	0.105557	F7A10.25	phospholipase D alpha 4 [Cucumis sativus]	GO:0005886,GO:0005509,GO:0070290,GO:0004630,GO:0051301,GO:0006995,GO:0016036,GO:0051365,GO:0009825,GO:0046470,GO:0009395,GO:0045848,GO:0009791,GO:0006970,GO:0048364	plasma membrane|calcium ion binding|N-acylphosphatidylethanolamine-specific phospholipase D activity|phospholipase D activity|cell division|cellular response to nitrogen starvation|cellular response to phosphate starvation|cellular response to potassium ion starvation|multidimensional cell growth|phosphatidylcholine metabolic process|phospholipid catabolic process|positive regulation of nitrogen …	csv00564,csv00565,csv04144	Glycerophospholipid metabolism|Ether lipid metabolism|Endocytosis
Csa3G199550	16381.7	0.143521	-11.5009	0.318504	-1.65062	1.31e-30	3.36e-28	Down	780.053	697.93	661.108	314.523	221.901	193.628		uncharacterized protein LOC101204288 [Cucumis sativus]
Csa3G902380	18.1557	0.511777	-3.19381	0.322078	-1.63452	0.00140408	0.00869479	Down	2.03802	1.66308	2.04594	0.50287	0.648594	0.828318		auxin-responsive protein SAUR78 [Cucumis sativus]
Csa7G046690	770.4	0.401253	-4.06412	0.322923	-1.63074	4.82e-05	0.000498694	Down	49.2214	34.5035	84.8931	20.5814	21.8377	15.4541		wound-responsive family protein [Cucumis melo var. makuwa]
Csa2G224250	52.245	0.365281	-4.45179	0.32395	-1.62616	8.52e-06	0.000111571	Down	4.73169	4.98736	3.05362	0.889538	2.28666	1.2238	F6F9.28	chlorophyllase-1-like [Cucumis melo var. makuwa]	GO:0005773,GO:0047746,GO:0102293,GO:0015996,GO:0042742,GO:0050832	vacuole|chlorophyllase activity|pheophytinase b activity|chlorophyll catabolic process|defense response to bacterium|defense response to fungus	csv00860	Porphyrin metabolism
Csa7G447990	1121.46	0.163088	-9.97076	0.32396	-1.62611	2.05e-23	3.57e-21	Down	31.1451	33.2073	41.8059	11.4897	15.6686	9.28499		pectinesterase [Cucumis sativus]	GO:0005618,GO:0005576,GO:0045330,GO:0004857,GO:0030599,GO:0042545,GO:0045490	cell wall|extracellular region|aspartyl esterase activity|enzyme inhibitor activity|pectinesterase activity|cell wall modification|pectin catabolic process	csv00040	Pentose and glucuronate interconversions
Csa3G910670	46.3189	0.354633	-4.56822	0.325326	-1.62004	4.92e-06	6.88e-05	Down	4.86506	3.49419	4.12165	2.14891	1.10865	1.09407	OJ1457_D07.118	expansin-like B1 [Cucumis sativus]
Csa3G881780	60.865	0.301293	-5.36807	0.325931	-1.61736	7.96e-08	1.81e-06	Down	1.59806	1.61076	1.66157	0.762339	0.364168	0.570777	T6B12.2	receptor-like protein 7 [Cucumis sativus]	GO:0016021,GO:0005886	integral component of membrane|plasma membrane
Csa6G290790	256.409	0.185341	-8.71919	0.326233	-1.61603	2.8e-18	3.25e-16	Down	21.9384	22.1758	26.7605	10.5239	7.98078	6.10659	F24B9.1	LOB domain-containing protein 1 [Cucumis sativus]	GO:0005739	mitochondrion
Csa2G351860	11.8621	0.634942	-2.52779	0.328735	-1.605	0.0114783	0.0474481	Down	1.94863	2.28167	2.27932	0.746977	1.12401	0.391493		hypothetical protein Csa_018634 [Cucumis sativus]
Csa4G640960	298.577	0.157225	-10.1835	0.329624	-1.60111	2.35e-24	4.34e-22	Down	15.374	13.4331	13.7676	5.56397	4.60236	4.8431	F11C1.120	uncharacterized acetyltransferase At3g50280 [Cucumis sativus]	GO:0016747	transferase activity, transferring acyl groups other than amino-acyl groups
Csa1G046230	56.348	0.293521	-5.42581	0.331576	-1.59259	5.77e-08	1.36e-06	Down	2.09007	2.36314	2.60775	0.854611	0.771584	0.865947	T18B16.150	probable apyrase 7 isoform X2 [Cucumis sativus]	GO:0016021,GO:0102490,GO:0005524,GO:0102485,GO:0102486,GO:0102491,GO:0102488,GO:0102487,GO:0102489,GO:0009901,GO:0010584	integral component of membrane|8-oxo-dGTP phosphohydrolase activity|ATP binding|dATP phosphohydrolase activity|dCTP phosphohydrolase activity|dGTP phosphohydrolase activity|dTTP phosphohydrolase activity|dUTP phosphohydrolase activity|GTP phosphohydrolase activity|anther dehiscence|pollen exine formation
Csa5G197110	208.977	0.173871	-9.08261	0.334666	-1.5792	1.06e-19	1.4e-17	Down	19.765	18.5367	21.8892	7.10772	7.79042	6.55355		18.1 kDa class I heat shock protein [Cucumis sativus]	GO:0005737	cytoplasm	csv04141	Protein processing in endoplasmic reticulum
Csa2G382650	41.3188	0.382633	-4.12014	0.335294	-1.5765	3.79e-05	0.000403957	Down	2.16143	2.87254	3.71297	1.53703	1.01187	0.553822	F23A5.19	probable WRKY transcription factor 40-like [Cucumis sativus]	GO:0005634,GO:0003700,GO:0043565,GO:0044212,GO:0042742,GO:0050832,GO:0045892,GO:0031347,GO:0010200,GO:0002237,GO:0009751,GO:0009611	nucleus|DNA-binding transcription factor activity|sequence-specific DNA binding|transcription regulatory region DNA binding|defense response to bacterium|defense response to fungus|negative regulation of transcription, DNA-templated|regulation of defense response|response to chitin|response to molecule of bacterial origin|response to salicylic acid|response to wounding
Csa6G014570	402.652	0.147525	-10.6483	0.336603	-1.57088	1.78e-26	3.67e-24	Down	30.8134	25.596	32.5529	10.6851	10.1093	11.2002		uncharacterized protein LOC105435745 [Cucumis sativus]
Csa5G567800	806.12	0.122934	-12.7548	0.337276	-1.568	2.93e-37	9.29e-35	Down	49.9834	53.9892	50.8078	15.9917	18.4663	21.1835		21 kDa protein [Cucumis sativus]	GO:0004857	enzyme inhibitor activity
Csa2G271440	219.292	0.172974	-9.00248	0.33981	-1.5572	2.21e-19	2.85e-17	Down	34.0894	32.8427	28.3349	12.3812	10.6174	11.6174		hypothetical protein Csa_005914 [Cucumis sativus]
Csa3G646670	32.8282	0.392982	-3.95031	0.340942	-1.5524	7.81e-05	0.000755892	Down	2.05663	2.06617	1.53316	0.555337	0.596887	0.91474	T18A20.16	RING-H2 finger protein ATL3 [Cucumis sativus]	GO:0016021,GO:0005886,GO:0046872,GO:0016740,GO:0016567	integral component of membrane|plasma membrane|metal ion binding|transferase activity|protein ubiquitination
Csa1G095020	134.858	0.211997	-7.27071	0.34356	-1.54137	3.58e-13	2.21e-11	Down	4.6191	6.1716	5.6552	1.76019	1.76576	2.48934	MRN17.17	probable glucuronoxylan glucuronosyltransferase F8H [Cucumis sativus]	GO:0005794,GO:0000139,GO:0016021,GO:0016757,GO:0071555,GO:0006486	Golgi apparatus|Golgi membrane|integral component of membrane|transferase activity, transferring glycosyl groups|cell wall organization|protein glycosylation
Csa2G004690	525.049	0.136088	-11.2716	0.345337	-1.53392	1.81e-29	4.42e-27	Down	42.2325	36.7778	35.6005	14.6762	13.6602	14.0092	MOB24.9	heat stress transcription factor C-1 [Cucumis sativus]	GO:0005634,GO:0003700,GO:0000978,GO:0043565,GO:0034605,GO:0061408	nucleus|DNA-binding transcription factor activity|RNA polymerase II proximal promoter sequence-specific DNA binding|sequence-specific DNA binding|cellular response to heat|positive regulation of transcription from RNA polymerase II promoter in response to heat stress
Csa4G618520	1382.11	0.113209	-13.546	0.345431	-1.53353	8.36e-42	3.18e-39	Down	59.4534	62.4182	59.8149	26.0593	21.1928	19.7015	UGT71A16	anthocyanidin 3-O-glucosyltransferase 2 [Cucumis sativus]	GO:0035251	UDP-glucosyltransferase activity
Csa1G532200	62.9306	0.292184	-5.24201	0.345886	-1.53163	1.59e-07	3.36e-06	Down	2.69203	3.59745	3.64607	1.12247	0.944408	1.59408		uncharacterized protein LOC101223236 [Cucumis sativus]
Csa6G046240	24.4633	0.471669	-3.22055	0.34892	-1.51903	0.00127947	0.00803095	Down	1.3195	1.85867	1.95991	0.867105	0.773199	0.252473	DIVARICATA	transcription factor DIVARICATA [Cucumis sativus]	GO:0005634,GO:0003677,GO:0048262,GO:0009908	nucleus|DNA binding|determination of dorsal/ventral asymmetry|flower development
Csa3G892750	40.9368	0.471266	-3.21437	0.349939	-1.51482	0.00130732	0.00818893	Down	1.45361	1.12784	1.73436	1.14489	0.195491	0.280869	AN6395	probable rhamnogalacturonate lyase B [Cucumis sativus]	GO:0005576,GO:0030246,GO:0016837,GO:0102210,GO:0071555,GO:0045490	extracellular region|carbohydrate binding|carbon-oxygen lyase activity, acting on polysaccharides|rhamnogalacturonan endolyase activity|cell wall organization|pectin catabolic process
Csa3G889170	118.381	0.240368	-6.29442	0.350388	-1.51298	3.09e-10	1.2e-08	Down	12.1784	15.8618	19.8441	7.71104	5.2191	4.86913	P0524E08.106	signal peptidase complex-like protein DTM1 [Cucumis sativus]	GO:0005789,GO:0016021,GO:0005787,GO:0008233,GO:0048658,GO:0009555,GO:0006465	endoplasmic reticulum membrane|integral component of membrane|signal peptidase complex|peptidase activity|anther wall tapetum development|pollen development|signal peptide processing
Csa3G684690	234.95	0.18238	-8.2897	0.350656	-1.51187	1.14e-16	1.11e-14	Down	12.4797	12.6835	11.0184	5.73715	3.53898	4.29551	F4F15.80	hypothetical protein Csa_002202 [Cucumis sativus]	GO:0016021,GO:0008374,GO:0016127,GO:0034434	integral component of membrane|O-acyltransferase activity|sterol catabolic process|sterol esterification
Csa7G041360	37.4505	0.406695	-3.70481	0.351908	-1.50673	0.000211549	0.00177158	Down	1.20208	3.02907	3.24034	1.13778	0.867446	0.763279	MHK10.10	basic leucine zipper 61 [Cucumis sativus]	GO:0005634,GO:0003677,GO:0003700,GO:0009555,GO:0045893	nucleus|DNA binding|DNA-binding transcription factor activity|pollen development|positive regulation of transcription, DNA-templated
Csa3G169500	17.366	0.5592	-2.69274	0.352139	-1.50578	0.00708674	0.0322929	Down	0.47329	0.884233	0.569797	0.407419	0.204354	0.106765	YLL040C	uncharacterized protein LOC101213129 isoform X3 [Cucumis sativus]	GO:0019898,GO:0005794,GO:0071561,GO:0044232,GO:0005628,GO:1990816,GO:0032120,GO:0045324,GO:0007005,GO:0045053,GO:0006623	extrinsic component of membrane|Golgi apparatus|nucleus-vacuole junction|organelle membrane contact site|prospore membrane|vacuole-mitochondrion membrane contact site|ascospore-type prospore membrane assembly|late endosome to vacuole transport|mitochondrion organization|protein retention in Golgi apparatus|protein targeting to vacuole
Csa3G164470	870.318	0.128304	-11.7249	0.352488	-1.50435	9.5e-32	2.62e-29	Down	34.2958	31.6829	31.6878	14.1065	12.193	10.4761	F3E22.1	lipoamide acyltransferase component of branched-chain alpha-keto acid dehydrogenase complex, mitochondrial isoform X3 [Cucumis sativus]	GO:0005737,GO:0005759,GO:0005739,GO:0016407,GO:0004147,GO:0043754,GO:0031405,GO:0008270,GO:0043617,GO:0006633,GO:0009646,GO:0009744	cytoplasm|mitochondrial matrix|mitochondrion|acetyltransferase activity|dihydrolipoamide branched chain acyltransferase activity|dihydrolipoyllysine-residue (2-methylpropanoyl)transferase activity|lipoic acid binding|zinc ion binding|cellular response to sucrose starvation|fatty acid biosynthetic process|response to absence of light|response to sucrose	csv00280,csv00640	Valine, leucine and isoleucine degradation|Propanoate metabolism
Csa5G605150	52.2377	0.338731	-4.41753	0.354448	-1.49636	9.98e-06	0.000127983	Down	4.85323	3.23017	5.86607	2.29451	1.61746	1.36507	T24P13.23	ribonuclease 3 [Cucumis sativus]	GO:0005576,GO:0004521,GO:0033897,GO:0003723,GO:0006401	extracellular region|endoribonuclease activity|ribonuclease T2 activity|RNA binding|RNA catabolic process
Csa3G117940	45.9454	0.326246	-4.57828	0.355114	-1.49364	4.69e-06	6.65e-05	Down	8.99852	9.27012	8.93717	4.39333	2.89225	3.02211		uncharacterized protein LOC101222685 [Cucumis sativus]
Csa6G008640	30.2926	0.410458	-3.62788	0.356237	-1.48909	0.00028576	0.00229357	Down	1.38572	1.88336	1.7523	0.842254	0.691298	0.361168	T7H20.240	aspartic proteinase PCS1 [Cucumis sativus]	GO:0005783,GO:0004190,GO:0008233,GO:0012501,GO:0030163,GO:0006508	endoplasmic reticulum|aspartic-type endopeptidase activity|peptidase activity|programmed cell death|protein catabolic process|proteolysis
Csa5G613560	81.8503	0.289316	-5.14235	0.356566	-1.48776	2.71e-07	5.37e-06	Down	3.78313	5.64092	7.33927	2.35806	1.41932	2.5706	MUK11.14	transcription repressor OFP13 [Cucumis sativus]	GO:0005634,GO:0045892	nucleus|negative regulation of transcription, DNA-templated
Csa4G004870	361.681	0.162615	-9.14402	0.356764	-1.48696	6.02e-20	8e-18	Down	41.6453	38.9333	37.8005	15.2311	17.8004	11.974	F18B13.26	MAPK kinase substrate protein At1g80180 [Cucumis sativus]	GO:0005886,GO:0010375	plasma membrane|stomatal complex patterning
Csa3G017010	83.3403	0.249086	-5.9678	0.356879	-1.48649	2.4e-09	7.96e-08	Down	2.58244	2.76035	2.61737	0.820792	1.06818	1.13939		eEF1A lysine and N-terminal methyltransferase [Cucumis sativus]
Csa3G878200	1263.42	0.103076	-14.3534	0.358614	-1.4795	1.01e-46	4.94e-44	Down	29.2512	31.5283	30.9799	13.1282	10.7999	11.161	F18G18.90	EIN3-binding F-box protein 1-like [Cucumis sativus]	GO:0005634,GO:0019005,GO:0009873,GO:0010105,GO:0016567,GO:0009723,GO:0031146,GO:0006511	nucleus|SCF ubiquitin ligase complex|ethylene-activated signaling pathway|negative regulation of ethylene-activated signaling pathway|protein ubiquitination|response to ethylene|SCF-dependent proteasomal ubiquitin-dependent protein catabolic process|ubiquitin-dependent protein catabolic process	csv04016,csv04075	MAPK signaling pathway - plant|Plant hormone signal transduction
Csa5G385350	83.564	0.270402	-5.46122	0.359304	-1.47672	4.73e-08	1.13e-06	Down	8.65606	7.31584	6.62145	2.33852	3.7408	2.58375		PREDICTED: uncharacterized protein LOC103499268 [Cucumis melo]
Csa3G860320	67.3968	0.306577	-4.80626	0.36011	-1.47349	1.54e-06	2.49e-05	Down	5.70727	5.893	4.31059	3.02714	1.49076	1.61538	F1B16.8	bZIP transcription factor 11 [Cucumis sativus]	GO:0005634,GO:0003700,GO:0046982,GO:0043565,GO:0044212,GO:0045893,GO:0009845	nucleus|DNA-binding transcription factor activity|protein heterodimerization activity|sequence-specific DNA binding|transcription regulatory region DNA binding|positive regulation of transcription, DNA-templated|seed germination
Csa4G012390	28.1871	0.44125	-3.33739	0.360326	-1.47263	0.000845677	0.00570517	Down	2.42107	4.07238	2.36921	1.45582	1.31438	0.610398	T19L5.40	probable WRKY transcription factor 75 [Cucumis sativus]	GO:0005634,GO:0003700,GO:0000978,GO:0044212,GO:0010055,GO:0048527,GO:0000122,GO:0043620,GO:0032107	nucleus|DNA-binding transcription factor activity|RNA polymerase II proximal promoter sequence-specific DNA binding|transcription regulatory region DNA binding|atrichoblast differentiation|lateral root development|negative regulation of transcription by RNA polymerase II|regulation of DNA-templated transcription in response to stress|regulation of response to nutrient levels
Csa2G406720	18.9259	0.549379	-2.68051	0.360329	-1.47261	0.00735107	0.0332583	Down	2.90586	1.98977	1.76244	1.56774	0.579415	0.43245		mavicyanin [Cucumis sativus]	GO:0009055,GO:0046872	electron transfer activity|metal ion binding
Csa7G272130	289.884	0.155857	-9.4161	0.361591	-1.46757	4.68e-21	7.24e-19	Down	7.34767	6.98628	6.48006	2.90045	2.33779	2.81181	K21L13.7	pentatricopeptide repeat-containing protein At5g65560 isoform X1 [Cucumis sativus]
Csa1G378520	37.1215	0.449064	-3.26466	0.361974	-1.46604	0.00109595	0.00707711	Down	5.49994	2.99486	4.77964	3.10479	0.673432	1.40734	T29J13.20	probable sulfate transporter 3.5 isoform X1 [Cucumis sativus]	GO:0016021,GO:0015301,GO:0008271,GO:0015116,GO:0015293	integral component of membrane|anion:anion antiporter activity|secondary active sulfate transmembrane transporter activity|sulfate transmembrane transporter activity|symporter activity
Csa6G517000	22.0693	0.452156	-3.2333	0.363	-1.46196	0.00122367	0.00772865	Down	2.16598	2.34241	2.25205	0.85708	0.788144	0.973263		hypothetical protein ES319_D10G022400v1 [Gossypium barbadense]
Csa6G511830	45.1144	0.326359	-4.44175	0.366121	-1.44961	8.92e-06	0.000116267	Down	3.09938	2.6195	2.99236	1.08626	1.22591	1.09118	F24O1.13	serine/threonine/tyrosine-protein kinase HT1 [Cucumis sativus]	GO:0005524,GO:0004674	ATP binding|protein serine/threonine kinase activity
Csa2G058630	15.7792	0.556432	-2.59785	0.367158	-1.44553	0.00938101	0.0403216	Down	1.6965	1.21658	2.40534	0.867105	0.474463	0.743649		uncharacterized protein LOC105434720 [Cucumis sativus]
Csa7G425930	21.1216	0.488732	-2.95518	0.367473	-1.44429	0.00312485	0.0167815	Down	2.03494	2.80913	2.70823	1.49773	0.500822	0.959399	177O13.37	uncharacterized protein LOC101212849 [Cucumis sativus]	GO:0043531,GO:0005524,GO:0006952	ADP binding|ATP binding|defense response
Csa7G253810	85.5978	0.272855	-5.26654	0.369334	-1.437	1.39e-07	2.98e-06	Down	2.37914	3.50625	3.72382	0.862976	1.54778	1.34316	MVE11.10	polyol transporter 5 [Cucumis sativus]	GO:0005887,GO:0005886,GO:0005351,GO:0015591,GO:0015148,GO:0005354,GO:0005355,GO:0015168,GO:0015575,GO:0015145,GO:0005365,GO:0015576,GO:0008645,GO:0010311	integral component of plasma membrane|plasma membrane|carbohydrate:proton symporter activity|D-ribose transmembrane transporter activity|D-xylose transmembrane transporter activity|galactose transmembrane transporter activity|glucose transmembrane transporter activity|glycerol transmembrane transporter activity|mannitol transmembrane transporter activity|monosaccharide transmembrane transporter a…
Csa7G073450	614.063	0.343105	-4.17832	0.370206	-1.4336	2.94e-05	0.000325184	Down	26.8333	24.941	22.9248	12.5565	11.1902	5.78637	TOGT1	scopoletin glucosyltransferase [Cucumis sativus]	GO:0042802,GO:0050275	identical protein binding|scopoletin glucosyltransferase activity	csv00999	Biosynthesis of various plant secondary metabolites
Csa5G606790	247.024	0.170691	-8.39732	0.370271	-1.43335	4.57e-17	4.85e-15	Down	20.6484	19.07	21.4689	8.02429	9.33297	6.76545	F4N2.12	protein BIG GRAIN 1-like E [Cucumis sativus]	GO:0005886,GO:0060918,GO:0009734,GO:0010929	plasma membrane|auxin transport|auxin-activated signaling pathway|positive regulation of auxin mediated signaling pathway
Csa1G166760	272.146	0.16978	-8.44216	0.37028	-1.43331	3.12e-17	3.35e-15	Down	23.0691	21.2927	17.9072	9.04509	7.07534	8.57815	F7K24.10	protein FAF-like, chloroplastic [Cucumis sativus]
Csa3G849890	68.4981	0.288518	-4.94124	0.372255	-1.42564	7.76e-07	1.35e-05	Down	5.09456	3.60168	5.59684	2.25999	1.62643	1.80245	F19C24.9	dof zinc finger protein DOF1.7 [Cucumis sativus]	GO:0005634,GO:0003700,GO:0046872,GO:0044212,GO:0006355,GO:0010200	nucleus|DNA-binding transcription factor activity|metal ion binding|transcription regulatory region DNA binding|regulation of transcription, DNA-templated|response to chitin
Csa2G381820	47.534	0.320507	-4.43945	0.372969	-1.42287	9.02e-06	0.000117438	Down	2.79024	2.83339	2.98772	0.979134	1.40929	1.02633	OsJ_17281	glycosyltransferase BC10 [Cucumis sativus]
Csa7G011860	20.3754	0.478043	-2.97179	0.373546	-1.42064	0.00296066	0.0160311	Down	0.547103	0.573178	0.39108	0.227201	0.175323	0.201514	T24I21.14	beta-galactosidase 13 [Cucumis sativus]	GO:0048046,GO:0005618,GO:0005773,GO:0004565,GO:0030246,GO:0005975	apoplast|cell wall|vacuole|beta-galactosidase activity|carbohydrate binding|carbohydrate metabolic process
Csa4G028990	164.78	0.18362	-7.73074	0.373838	-1.41951	1.07e-14	8.1e-13	Down	6.79517	6.64299	7.36713	3.05752	2.5014	2.73818	MKA23.7	putative uncharacterized protein DDB_G0285119 [Cucumis sativus]	GO:0005634	nucleus
Csa5G602220	326.062	0.161337	-8.7635	0.375301	-1.41388	1.89e-18	2.22e-16	Down	49.47	46.6712	47.8374	24.0361	17.3274	16.3603		uncharacterized protein LOC105435564 [Cucumis sativus]
Csa2G369840	238.125	0.194234	-7.27509	0.375511	-1.41307	3.46e-13	2.16e-11	Down	40.7005	33.0727	27.0223	15.6395	12.1691	12.8205		uncharacterized protein LOC101216451 [Cucumis sativus]
Csa3G133130	79.3395	0.250069	-5.63454	0.376566	-1.40903	1.76e-08	4.65e-07	Down	5.76562	6.38325	5.25854	2.32649	2.33385	2.33026	T26J14.12	ethylene-responsive transcription factor ERF118 [Cucumis sativus]	GO:0005634,GO:0003677,GO:0003700,GO:0009873	nucleus|DNA binding|DNA-binding transcription factor activity|ethylene-activated signaling pathway
Csa1G263960	95.0118	0.308088	-4.56869	0.376949	-1.40756	4.91e-06	6.87e-05	Down	7.96982	12.6484	10.8909	7.06071	2.87992	2.68391	NCS1	probable 2-oxoglutarate-dependent dioxygenase ANS isoform X1 [Cucumis sativus]	GO:0050474,GO:0046872,GO:0016491,GO:0009820	(S)-norcoclaurine synthase activity|metal ion binding|oxidoreductase activity|alkaloid metabolic process
Csa6G439970	48.8997	0.330574	-4.24321	0.378222	-1.4027	2.2e-05	0.000253415	Down	3.56759	2.63832	3.70936	1.10366	1.68481	1.20717		uncharacterized protein LOC105436016 [Cucumis sativus]
Csa2G079100	5476.91	0.120188	-11.6242	0.379693	-1.3971	3.1e-31	8.31e-29	Down	246.393	209.005	188.909	93.4079	86.2845	82.4064	F13O11.9	ammonium transporter 1 member 2 [Cucumis sativus]	GO:0005887,GO:0005886,GO:0008519,GO:0072488,GO:0015696,GO:0015843,GO:0009624	integral component of plasma membrane|plasma membrane|ammonium transmembrane transporter activity|ammonium transmembrane transport|ammonium transport|methylammonium transport|response to nematode
Csa5G152910	225.045	0.176329	-7.9222	0.37974	-1.39691	2.33e-15	1.97e-13	Down	26.553	26.2603	24.3117	11.2624	11.6232	8.32318	F2A19.60	E3 ubiquitin-protein ligase RHA1B [Cucumis sativus]
Csa5G589890	425.429	0.139976	-9.96253	0.380373	-1.39451	2.22e-23	3.84e-21	Down	17.5485	16.6347	17.7758	6.18173	7.67918	7.20642	F1N21.16	F-box protein At1g67340 [Cucumis sativus]	GO:0005634,GO:0016567	nucleus|protein ubiquitination
Csa7G450720	152.771	0.201184	-6.89753	0.382182	-1.38767	5.29e-12	2.76e-10	Down	8.65975	12.9505	10.3044	4.2294	4.6868	4.02088		uncharacterized protein LOC101209615 [Cucumis sativus]
Csa4G644620	23.4803	0.490337	-2.82973	0.38222	-1.38752	0.00465871	0.0231184	Down	4.39548	2.88939	2.53897	1.99697	1.4023	0.62797	F10C21.18	hypothetical protein Csa_011999 [Cucumis sativus]	GO:0005576,GO:0004185,GO:0019748	extracellular region|serine-type carboxypeptidase activity|secondary metabolic process
Csa2G139860	123.686	0.217372	-6.37707	0.382571	-1.3862	1.81e-10	7.33e-09	Down	7.74081	6.22357	7.18166	3.36804	2.60526	2.6797	OsJ_35025	cytochrome P450 714C2 isoform X1 [Cucumis sativus]	GO:0016021,GO:0020037,GO:0005506,GO:0004497,GO:0016705	integral component of membrane|heme binding|iron ion binding|monooxygenase activity|oxidoreductase activity, acting on paired donors, with incorporation or reduction of molecular oxygen
Csa2G373450	37.509	0.39007	-3.5505	0.382905	-1.38494	0.000384506	0.00294752	Down	2.56244	2.65091	1.57235	1.33117	0.818459	0.630152	F18A17.80	GATA transcription factor 12 [Cucumis sativus]	GO:0005634,GO:0003700,GO:0043565,GO:0008270,GO:0071555,GO:0007623,GO:0007275,GO:0045893,GO:0009416,GO:1905177	nucleus|DNA-binding transcription factor activity|sequence-specific DNA binding|zinc ion binding|cell wall organization|circadian rhythm|multicellular organism development|positive regulation of transcription, DNA-templated|response to light stimulus|tracheary element differentiation
Csa1G574230	42.4302	0.330671	-4.18776	0.382951	-1.38477	2.82e-05	0.000312477	Down	3.58826	3.95792	3.60438	1.55424	1.3097	1.69433		uncharacterized protein LOC101218036 [Cucumis sativus]
Csa6G502700	18.148	0.508459	-2.71609	0.383947	-1.38102	0.00660576	0.030422	Down	1.59178	1.96193	1.65503	0.949176	0.748142	0.426399	C7A10.740	GATA transcription factor 18 [Cucumis sativus]	GO:0005634,GO:0003700,GO:0043565,GO:0008270,GO:0009908	nucleus|DNA-binding transcription factor activity|sequence-specific DNA binding|zinc ion binding|flower development
Csa5G608590	82.8373	0.255433	-5.36886	0.386521	-1.37138	7.92e-08	1.8e-06	Down	6.80016	6.81882	6.95054	3.71129	2.24564	2.53171	T19P19.60	ACD11 homolog protein [Cucumis sativus]	GO:0005737,GO:0005829,GO:0016020,GO:0005634,GO:1902387,GO:1902388,GO:0120013,GO:0008289,GO:0035627,GO:0120009	cytoplasm|cytosol|membrane|nucleus|ceramide 1-phosphate binding|ceramide 1-phosphate transporter activity|intermembrane lipid transfer activity|lipid binding|ceramide transport|intermembrane lipid transfer
Csa3G733930	25.2201	0.433925	-3.16013	0.386554	-1.37126	0.00157698	0.00957721	Down	2.74282	1.82397	2.32125	0.912862	0.981162	0.956867		hypothetical protein Csa_002313 [Cucumis sativus]
Csa1G699550	122.745	0.239414	-5.72681	0.386602	-1.37108	1.02e-08	2.85e-07	Down	5.44744	6.43895	6.05089	3.56247	1.9777	1.84897		uncharacterized protein LOC101203162 [Cucumis sativus]
Csa2G346000	38.5347	0.34967	-3.92009	0.386694	-1.37073	8.85e-05	0.000840981	Down	2.16236	2.51594	2.51808	1.19363	0.753921	1.01947	T20H2.4	expansin-A11-like precursor [Cucumis sativus]
Csa2G425800	26.2953	0.423018	-3.23598	0.387193	-1.36888	0.00121227	0.00767447	Down	2.28004	3.24004	2.09174	1.02826	0.962746	1.14968		hypothetical protein Csa_022628 [Cucumis sativus]
Csa3G073900	957.434	0.120814	-11.3008	0.388156	-1.36529	1.3e-29	3.21e-27	Down	71.4323	71.8382	65.9187	25.9858	31.9594	28.6004	ERF-5	hypothetical protein Csa_010710 [Cucumis sativus]	GO:0005634,GO:0003677,GO:0003700,GO:0006952,GO:0009873	nucleus|DNA binding|DNA-binding transcription factor activity|defense response|ethylene-activated signaling pathway
Csa7G430240	23.9249	0.474818	-2.86873	0.389009	-1.36212	0.00412125	0.020977	Down	1.0211	1.00683	0.803427	0.394948	0.169799	0.620981	4CL2	4-coumarate--CoA ligase 2 [Cucumis sativus]	GO:0016207,GO:0005524,GO:0009698	4-coumarate-CoA ligase activity|ATP binding|phenylpropanoid metabolic process	csv00130,csv00940	Ubiquinone and other terpenoid-quinone biosynthesis|Phenylpropanoid biosynthesis
Csa7G352500	213.731	0.221885	-6.1348	0.389253	-1.36122	8.53e-10	3.08e-08	Down	6.19406	7.91146	10.0543	4.64862	2.30487	3.05244	T27E11.110	membrane protein of ER body 2 [Cucumis sativus]	GO:0005783,GO:0005789,GO:0010168,GO:0016021,GO:0016020,GO:0005381,GO:0005384,GO:0030026,GO:0006880	endoplasmic reticulum|endoplasmic reticulum membrane|ER body|integral component of membrane|membrane|iron ion transmembrane transporter activity|manganese ion transmembrane transporter activity|cellular manganese ion homeostasis|intracellular sequestering of iron ion
Csa4G637130	405.809	0.148207	-9.16753	0.389936	-1.35869	4.84e-20	6.53e-18	Down	26.747	22.5188	22.2051	9.7588	9.32552	10.7583	F3H9.7	PREDICTED: VQ motif-containing protein 4 [Cucumis melo]	GO:0005634,GO:0006952,GO:0051245,GO:0043433	nucleus|defense response|negative regulation of cellular defense response|negative regulation of DNA-binding transcription factor activity
Csa6G504460	59.1521	0.286004	-4.73771	0.390933	-1.355	2.16e-06	3.37e-05	Down	1.90647	2.53257	2.3126	0.974424	1.00466	0.822792	F8D23	AAA-ATPase At2g18193 [Cucumis sativus]	GO:0005783,GO:0016021,GO:0005524,GO:0016887	endoplasmic reticulum|integral component of membrane|ATP binding|ATPase activity
Csa7G407820	19.2321	0.502651	-2.69017	0.391689	-1.35222	0.00714153	0.0325149	Down	1.09239	1.35813	1.48148	0.291306	0.730571	0.610698	F15J5.1	probable WRKY transcription factor 68-like [Cucumis sativus]	GO:0005634,GO:0003700,GO:0043565,GO:0042659	nucleus|DNA-binding transcription factor activity|sequence-specific DNA binding|regulation of cell fate specification
Csa2G047790	203.663	0.173304	-7.79644	0.391979	-1.35115	6.37e-15	5.07e-13	Down	20.7019	19.7346	19.5938	9.7022	7.40547	8.03275	F17I23.250	transcription factor IBH1-like 1 [Cucumis sativus]	GO:0005634,GO:0003677,GO:0003700,GO:0046983,GO:0009742,GO:0009740,GO:0040008	nucleus|DNA binding|DNA-binding transcription factor activity|protein dimerization activity|brassinosteroid mediated signaling pathway|gibberellic acid mediated signaling pathway|regulation of growth
Csa4G343590	87.2404	0.268571	-5.02586	0.392347	-1.3498	5.01e-07	9.26e-06	Down	3.07242	3.3484	2.20974	1.46409	0.85281	1.3119	T32G6.3	cytokinin dehydrogenase 9 [Cucumis sativus]	GO:0005773,GO:0019139,GO:0071949,GO:0009823,GO:0048507	vacuole|cytokinin dehydrogenase activity|FAD binding|cytokinin catabolic process|meristem development	csv00908	Zeatin biosynthesis
Csa6G148320	226.849	0.17147	-7.82461	0.39456	-1.34168	5.09e-15	4.1e-13	Down	15.9802	13.0635	15.0531	6.2363	5.74248	6.63449		hypothetical protein Csa_020607 [Cucumis sativus]
Csa2G354950	32.1945	0.398324	-3.36349	0.395087	-1.33976	0.000769646	0.00524059	Down	0.426058	0.840214	0.779049	0.300364	0.316381	0.236133	F1P2.120	probable LRR receptor-like serine/threonine-protein kinase At3g47570 [Cucumis sativus]
Csa3G076020	1395.3	0.342406	-3.89742	0.396529	-1.3345	9.72e-05	0.000909587	Down	101.004	103.836	97.1216	63.3985	35.0445	29.7283	OSJNBa0056O06.9-1	lactoylglutathione lyase [Cucumis sativus]	GO:0019863,GO:0004462,GO:0016151,GO:0019243,GO:0006970,GO:0006979,GO:0009651	IgE binding|lactoylglutathione lyase activity|nickel cation binding|methylglyoxal catabolic process to D-lactate via S-lactoyl-glutathione|response to osmotic stress|response to oxidative stress|response to salt stress	csv00620	Pyruvate metabolism
Csa3G895650	82.4675	0.261036	-5.10548	0.397021	-1.33271	3.3e-07	6.41e-06	Down	3.40272	5.38391	5.26576	2.30542	1.62296	1.9926	F26P21.10	GATA transcription factor 9 [Cucumis sativus]	GO:0005634,GO:0003700,GO:0043565,GO:0008270,GO:0007623,GO:0045893,GO:0009416	nucleus|DNA-binding transcription factor activity|sequence-specific DNA binding|zinc ion binding|circadian rhythm|positive regulation of transcription, DNA-templated|response to light stimulus
Csa4G000960	93.35	0.239742	-5.55358	0.397375	-1.33143	2.8e-08	7.04e-07	Down	3.71033	4.40164	3.46597	1.83714	1.72405	1.33557		Transcriptional coactivator Hfi1/Transcriptional adapter 1 [Cucumis melo var. makuwa]
Csa6G301610	43.1149	0.408048	-3.25954	0.397755	-1.33005	0.00111594	0.00716728	Down	2.97723	3.58149	4.45758	1.09563	2.74774	0.765629	F27C12.29	zinc finger protein CONSTANS-LIKE 5 [Cucumis sativus]	GO:0005634,GO:0003700,GO:0043565,GO:0008270,GO:0010161,GO:0009909,GO:0010099	nucleus|DNA-binding transcription factor activity|sequence-specific DNA binding|zinc ion binding|red light signaling pathway|regulation of flower development|regulation of photomorphogenesis
Csa3G736610	190.46	0.207251	-6.40762	0.398325	-1.32798	1.48e-10	6.07e-09	Down	12.2636	10.5808	10.7694	6.47988	4.12116	3.72908	F9G14.60	E3 ubiquitin-protein ligase SGR9, amyloplastic [Cucumis sativus]	GO:0009501,GO:0005737,GO:0046872,GO:0061630,GO:0004842,GO:0009630,GO:0016567	amyloplast|cytoplasm|metal ion binding|ubiquitin protein ligase activity|ubiquitin-protein transferase activity|gravitropism|protein ubiquitination
Csa4G377150	24.1681	0.453206	-2.9243	0.399063	-1.32531	0.0034523	0.0182108	Down	6.93395	6.09795	6.23524	1.53256	3.65134	3.01207		uncharacterized protein LOC101216001 [Cucumis sativus]			csv00910	Nitrogen metabolism
Csa2G369830	53.3599	0.317531	-4.15667	0.400571	-1.31987	3.23e-05	0.000353218	Down	2.27462	2.35787	2.00116	1.34145	0.777513	0.718681	F3M18.17	serine/threonine-protein kinase-like protein At3g51990 [Cucumis sativus]
Csa5G635440	30.7065	0.39783	-3.31228	0.401167	-1.31772	0.000925387	0.0061405	Down	1.57796	1.75539	1.97721	0.868556	0.912796	0.476889	T19N8.15	uncharacterized protein At3g28850 [Cucumis sativus]	GO:0005886,GO:0009055,GO:0015035,GO:0045454	plasma membrane|electron transfer activity|protein disulfide oxidoreductase activity|cell redox homeostasis
Csa4G043840	836.205	0.13302	-9.85948	0.402898	-1.31151	6.24e-23	1.06e-20	Down	32.4497	29.7201	29.9904	16.0419	11.7304	11.9513	C7A10.650	scarecrow-like protein 15 [Cucumis sativus]	GO:0005634,GO:0003700,GO:0043565,GO:0030154,GO:0048831,GO:0006355	nucleus|DNA-binding transcription factor activity|sequence-specific DNA binding|cell differentiation|regulation of shoot system development|regulation of transcription, DNA-templated
Csa1G042340	41.1497	0.394748	-3.32114	0.403037	-1.31101	0.000896501	0.00598434	Down	3.36226	2.4748	2.41264	1.93634	1.01979	0.608903	F25P22.25	transcription factor BEE 3 [Cucumis sativus]	GO:0005634,GO:0003700,GO:0046983,GO:0043565,GO:0006355,GO:0006351	nucleus|DNA-binding transcription factor activity|protein dimerization activity|sequence-specific DNA binding|regulation of transcription, DNA-templated|transcription, DNA-templated
Csa1G570140	45.3239	0.3284	-3.98088	0.404071	-1.30732	6.87e-05	0.00067808	Down	1.35448	1.76485	1.5592	0.667571	0.818502	0.518334	MSJ1.17	root phototropism protein 3 isoform X1 [Cucumis sativus]	GO:0005886,GO:0009638,GO:0016567,GO:0007165	plasma membrane|phototropism|protein ubiquitination|signal transduction
Csa3G119780	42.2332	0.388306	-3.36541	0.404214	-1.30681	0.000764306	0.00521176	Down	2.8464	2.50322	1.51975	1.53347	0.749441	0.700659		uncharacterized protein LOC101212280 [Cucumis sativus]
Csa7G047960	23.6609	0.500329	-2.61102	0.404338	-1.30637	0.00902737	0.0390932	Down	2.48658	2.9059	3.92597	2.07114	0.377763	1.5789	MDA7.23	GPI-anchored protein LLG1 [Cucumis sativus]	GO:0031225,GO:0005886,GO:0090406,GO:0045927	anchored component of membrane|plasma membrane|pollen tube|positive regulation of growth
Csa3G875410	24.9826	0.428051	-3.04538	0.40512	-1.30358	0.00232385	0.0131702	Down	2.14625	1.88113	2.29353	0.731319	0.978178	1.0221	T23E18.1	uncharacterized protein At1g76070 [Cucumis sativus]	GO:0005886	plasma membrane
Csa5G167090	139.626	0.198718	-6.5517	0.405579	-1.30194	5.69e-11	2.54e-09	Down	7.12762	8.25979	6.41765	3.2299	3.05174	3.14939	MBK20.4	F-box protein At5g07610 [Cucumis sativus]
Csa6G376250	26.4564	0.41804	-3.10946	0.40616	-1.29988	0.00187428	0.0110247	Down	2.03152	2.80441	2.81634	1.38445	0.972184	0.943274	F24J8.15	probable calcium-binding protein CML44 [Cucumis sativus]	GO:0005509	calcium ion binding	csv04626	Plant-pathogen interaction
Csa5G171710	254.573	0.162946	-7.94365	0.407709	-1.29439	1.96e-15	1.68e-13	Down	7.3372	8.22408	7.0202	2.82062	3.55837	3.42696	MMI9.5	xyloglucan galactosyltransferase XLT2 [Cucumis sativus]	GO:0005794,GO:0000139,GO:0016021,GO:0008378,GO:0006486,GO:0009969	Golgi apparatus|Golgi membrane|integral component of membrane|galactosyltransferase activity|protein glycosylation|xyloglucan biosynthetic process
Csa3G859630	63.4041	0.297146	-4.3514	0.408101	-1.293	1.35e-05	0.000167523	Down	2.96589	3.01586	2.31281	1.51591	1.26726	0.827596	F6F9.23	uncharacterized protein LOC101206551 [Cucumis sativus]	GO:0030246	carbohydrate binding
Csa2G401430	21.4802	0.472558	-2.73433	0.408349	-1.29213	0.00625081	0.029126	Down	1.31765	1.0827	0.913337	0.336733	0.600532	0.509839	MQM1.21	probable carboxylesterase 18 [Cucumis sativus]	GO:0052689,GO:0009860	carboxylic ester hydrolase activity|pollen tube growth
Csa3G221740	22.4414	0.45803	-2.81847	0.408683	-1.29095	0.00482529	0.023717	Down	0.967005	1.50971	1.38247	0.659	0.371861	0.647594		uncharacterized protein LOC101211523 [Cucumis sativus]
Csa2G190740	631.857	0.119571	-10.7937	0.408778	-1.29061	3.69e-27	7.96e-25	Down	69.1217	86.8303	78.4927	33.0987	31.9505	36.9386	dl3265w	uncharacterized protein At4g14450, chloroplastic [Cucumis sativus]	GO:0009507,GO:0005737,GO:0005634	chloroplast|cytoplasm|nucleus
Csa1G070080	33.7261	0.39775	-3.2437	0.4089	-1.29018	0.00117989	0.00751116	Down	2.51362	3.13459	4.99641	1.51147	1.89531	1.18825		myrcene synthase, chloroplastic isoform X1 [Cucumis sativus]	GO:0031969,GO:0016021,GO:0000287,GO:0050551,GO:0016114	chloroplast membrane|integral component of membrane|magnesium ion binding|myrcene synthase activity|terpenoid biosynthetic process
Csa7G235760	27.4242	0.446895	-2.88493	0.409161	-1.28926	0.00391505	0.0201377	Down	1.00564	0.861123	1.2107	0.649261	0.189967	0.510419	F23E6.4	pentatricopeptide repeat-containing protein At2g42920, chloroplastic [Cucumis sativus]
Csa7G407710	62.252	0.286985	-4.48642	0.40965	-1.28754	7.24e-06	9.74e-05	Down	4.74487	4.07038	3.65073	2.13415	1.55702	1.77945		uncharacterized protein LOC105436179 [Cucumis sativus]
Csa5G168940	91.567	0.274323	-4.6833	0.410446	-1.28474	2.82e-06	4.26e-05	Down	11.3674	8.75192	9.95718	6.20797	2.79444	4.25472	F14D7.1	MDIS1-interacting receptor like kinase 2 [Cucumis sativus]
Csa2G000930	50.9174	0.320949	-4.00039	0.410678	-1.28392	6.32e-05	0.000631094	Down	9.94766	7.75573	7.09575	4.49318	2.9654	3.47036	RING1	E3 ubiquitin-protein ligase RNF181 [Cucumis sativus]	GO:0046872,GO:0061630,GO:0004842,GO:0090378	metal ion binding|ubiquitin protein ligase activity|ubiquitin-protein transferase activity|seed trichome elongation
Csa1G707120	154.049	0.194385	-6.59838	0.411046	-1.28263	4.16e-11	1.9e-09	Down	7.82506	8.74217	6.82977	3.37572	3.68088	3.1923	T16H5.60	BOI-related E3 ubiquitin-protein ligase 1 [Cucumis sativus]	GO:0005634,GO:0046872,GO:0004842,GO:0042742,GO:0050832,GO:2000117,GO:0043069,GO:0043161,GO:0043067,GO:0009739	nucleus|metal ion binding|ubiquitin-protein transferase activity|defense response to bacterium|defense response to fungus|negative regulation of cysteine-type endopeptidase activity|negative regulation of programmed cell death|proteasome-mediated ubiquitin-dependent protein catabolic process|regulation of programmed cell death|response to gibberellin
Csa4G286400	53.1449	0.302327	-4.24027	0.411239	-1.28195	2.23e-05	0.000256137	Down	1.44049	1.83207	1.43261	0.704242	0.770695	0.581604	T10K17.90	FT-interacting protein 3 [Cucumis sativus]
Csa3G732440	42.119	0.343883	-3.72622	0.4114	-1.28138	0.000194374	0.00164948	Down	9.09817	7.17687	6.75694	2.79012	3.73193	3.62096		josephin-like protein [Cucumis sativus]
Csa4G052070	414.035	0.166674	-7.68234	0.411668	-1.28045	1.56e-14	1.16e-12	Down	44.1911	40.791	44.9433	15.5639	24.0672	17.2692		hypothetical protein Csa_015211 [Cucumis sativus]
Csa2G302180	33.2656	0.419125	-3.05441	0.411744	-1.28018	0.00225502	0.0128431	Down	0.685819	1.26795	1.09189	0.722972	0.285708	0.321501	F13J11.3	hypothetical protein Csa_005934 [Cucumis sativus]	GO:0000148,GO:0016021,GO:0003843,GO:0006075,GO:0071555,GO:0009556,GO:0009846,GO:0009860,GO:0010208,GO:0008360,GO:0080092	1,3-beta-D-glucan synthase complex|integral component of membrane|1,3-beta-D-glucan synthase activity|(1->3)-beta-D-glucan biosynthetic process|cell wall organization|microsporogenesis|pollen germination|pollen tube growth|pollen wall assembly|regulation of cell shape|regulation of pollen tube growth
Csa4G011770	1367.43	0.0981971	-13.0259	0.412051	-1.27911	8.72e-39	2.91e-36	Down	121.096	121.388	121.005	56.4306	52.0959	51.2686	T19L5.140	NAC domain-containing protein 83 [Cucumis sativus]	GO:0005634,GO:0003677,GO:0003700,GO:0010150,GO:0045892,GO:0009737,GO:0009651,GO:0016032,GO:0010089	nucleus|DNA binding|DNA-binding transcription factor activity|leaf senescence|negative regulation of transcription, DNA-templated|response to abscisic acid|response to salt stress|viral process|xylem development
Csa5G181490	126.169	0.21785	-5.86372	0.412534	-1.27741	4.53e-09	1.36e-07	Down	11.2329	12.1595	9.14029	5.24204	3.81877	5.2985		uncharacterized protein LOC101221084 [Cucumis sativus]
Csa6G521600	1785.37	0.108566	-11.7612	0.412693	-1.27686	6.19e-32	1.73e-29	Down	58.4148	69.0937	63.7597	32.3382	26.7615	24.9554	SPAC2F7.02c	nuclear envelope morphology protein 1 [Cucumis sativus]	GO:0005886,GO:0004721,GO:0006357,GO:0023052	plasma membrane|phosphoprotein phosphatase activity|regulation of transcription by RNA polymerase II|signaling
Csa6G513530	79.7835	0.323384	-3.94524	0.412989	-1.27582	7.97e-05	0.00076843	Down	2.5807	5.95001	4.41948	2.71566	1.79022	1.13863	F19K23.22	probable WRKY transcription factor 31 [Cucumis sativus]	GO:0005634,GO:0003700,GO:0043565,GO:0044212,GO:0080169,GO:0016036,GO:0009873,GO:0045892,GO:0010200	nucleus|DNA-binding transcription factor activity|sequence-specific DNA binding|transcription regulatory region DNA binding|cellular response to boron-containing substance deprivation|cellular response to phosphate starvation|ethylene-activated signaling pathway|negative regulation of transcription, DNA-templated|response to chitin
Csa4G291920	909.953	0.1322	-9.6368	0.413517	-1.27398	5.59e-22	9.08e-20	Down	62.2741	59.2715	51.2555	26.0713	27.9098	22.3067	F28I16	chaperonin-like RbcX protein 2, chloroplastic [Cucumis sativus]	GO:0009570,GO:0044183,GO:0061077	chloroplast stroma|protein binding involved in protein folding|chaperone-mediated protein folding
Csa7G419590	837.157	0.309115	-4.12067	0.413581	-1.27376	3.78e-05	0.000403426	Down	30.077	26.0981	23.7905	13.7369	13.9666	7.63735		uncharacterized protein LOC101214858 [Cucumis sativus]
Csa1G231530	420.49	0.459979	-2.76832	0.413692	-1.27337	0.00563454	0.0267662	Down	35.0995	31.617	22.6643	11.1671	20.2786	7.91203	T1G11.20	hypothetical protein Csa_023489 [Cucumis sativus]	GO:0005634,GO:0003700,GO:0009734,GO:0009880,GO:0045892,GO:0048364,GO:0010051	nucleus|DNA-binding transcription factor activity|auxin-activated signaling pathway|embryonic pattern specification|negative regulation of transcription, DNA-templated|root development|xylem and phloem pattern formation	csv04075	Plant hormone signal transduction
Csa6G014780	112.13	0.21693	-5.86692	0.413881	-1.27271	4.44e-09	1.35e-07	Down	3.50967	4.1209	3.31303	1.487	1.72848	1.60816	F3D13.1	pentatricopeptide repeat-containing protein At4g01400, mitochondrial [Cucumis sativus]
Csa3G835850	29.9224	0.405847	-3.13352	0.414162	-1.27173	0.00172721	0.0102902	Down	0.72414	0.933725	0.694999	0.493491	0.247526	0.29843	T9L3_170	cyclic nucleotide-gated ion channel 18 [Cucumis sativus]	GO:0016324,GO:0030659,GO:0016021,GO:0005262,GO:0005516,GO:0030552,GO:0030553,GO:0006874,GO:0009860	apical plasma membrane|cytoplasmic vesicle membrane|integral component of membrane|calcium channel activity|calmodulin binding|cAMP binding|cGMP binding|cellular calcium ion homeostasis|pollen tube growth	csv04626	Plant-pathogen interaction
Csa6G109730	299.452	0.156008	-8.12822	0.415215	-1.26807	4.36e-16	4.02e-14	Down	13.5011	15.306	14.572	7.77629	5.86825	5.54425	Solyc09g092500.1.1	hypothetical protein Csa_004781 [Cucumis sativus]	GO:0043231,GO:0080043,GO:0080044,GO:0008194	intracellular membrane-bounded organelle|quercetin 3-O-glucosyltransferase activity|quercetin 7-O-glucosyltransferase activity|UDP-glycosyltransferase activity
Csa6G445770	8927.82	0.143734	-8.81264	0.415616	-1.26668	1.22e-18	1.45e-16	Down	278.458	248.506	240.123	149.549	94.1146	98.2745	PAL	phenylalanine ammonia-lyase [Cucumis sativus]	GO:0005737,GO:0045548,GO:0009800,GO:0006559	cytoplasm|phenylalanine ammonia-lyase activity|cinnamic acid biosynthetic process|L-phenylalanine catabolic process	csv00360,csv00940	Phenylalanine metabolism|Phenylpropanoid biosynthesis
Csa2G277040	19.9234	0.488937	-2.58532	0.416371	-1.26406	0.0097289	0.041501	Down	1.04946	0.81306	1.28602	0.613023	0.461222	0.321287		uncharacterized protein LOC101213140 [Cucumis sativus]
Csa2G354960	51.6571	0.363465	-3.46974	0.417217	-1.26113	0.000520959	0.00380628	Down	1.46192	1.38876	1.01952	0.947677	0.457056	0.324752	F1P2.120	putative receptor-like protein kinase At3g47110 [Cucumis sativus]
Csa2G248720	138.039	0.222576	-5.62986	0.419554	-1.25307	1.8e-08	4.76e-07	Down	14.5322	12.7892	12.0031	7.77472	5.22276	4.65686		uncharacterized protein LOC105434603 [Cucumis sativus]
Csa6G028940	126.805	0.210253	-5.93312	0.42119	-1.24746	2.97e-09	9.61e-08	Down	10.138	8.6635	8.81104	4.03903	3.73193	4.67939		uncharacterized protein LOC105435751 [Cucumis sativus]
Csa7G047970	308.845	0.153563	-8.10329	0.422093	-1.24437	5.35e-16	4.82e-14	Down	60.5069	67.0173	51.5643	27.9604	25.6407	27.0879		hypothetical protein Csa_020428 [Cucumis sativus]
Csa3G128830	86.3614	0.256266	-4.84734	0.422725	-1.24221	1.25e-06	2.09e-05	Down	4.2026	5.35085	5.30291	3.00304	1.88284	1.7925		uncharacterized protein LOC105435079 [Cucumis sativus]
Csa1G240590	85.6736	0.239449	-5.18543	0.42289	-1.24164	2.16e-07	4.39e-06	Down	5.49332	5.0137	5.80602	2.55246	2.28121	2.52957	MOB24.9	heat stress transcription factor C-1 [Cucumis sativus]	GO:0005634,GO:0003700,GO:0000978,GO:0043565,GO:0034605,GO:0061408	nucleus|DNA-binding transcription factor activity|RNA polymerase II proximal promoter sequence-specific DNA binding|sequence-specific DNA binding|cellular response to heat|positive regulation of transcription from RNA polymerase II promoter in response to heat stress
Csa7G446730	193.374	0.248244	-4.98217	0.424315	-1.23679	6.29e-07	1.12e-05	Down	15.1928	13.719	14.2445	10.4081	4.15456	5.08365	F18B13.4	transcription repressor OFP14 [Cucumis sativus]	GO:0005634,GO:0045892	nucleus|negative regulation of transcription, DNA-templated
Csa7G452930	566.975	0.147164	-8.39411	0.424751	-1.23531	4.69e-17	4.96e-15	Down	45.0713	46.6756	50.0856	27.4245	18.3408	18.5255		uncharacterized protein LOC105436220 [Cucumis sativus]
Csa6G141350	30.5141	0.45136	-2.73195	0.425404	-1.23309	0.00629611	0.029294	Down	1.83319	3.84111	4.20915	1.87393	0.626621	1.96427		uncharacterized protein LOC101215539 [Cucumis sativus]
Csa7G343340	34.6642	0.448494	-2.74615	0.425836	-1.23163	0.00602997	0.0282842	Down	1.40525	0.868952	1.16392	0.876502	0.512911	0.178647	MTO24.5	malonyl-CoA:anthocyanidin 5-O-glucoside-6''-O-malonyltransferase [Cucumis sativus]	GO:0050736,GO:0009718	O-malonyltransferase activity|anthocyanin-containing compound biosynthetic process
Csa2G138740	25.6602	0.443975	-2.76874	0.426539	-1.22925	0.00562739	0.0267389	Down	0.996913	0.737241	1.23807	0.452921	0.59634	0.296721	F24L7.6	receptor like protein kinase S.2 [Cucumis sativus]
Csa5G652230	89.1614	0.248065	-4.95528	0.426544	-1.22923	7.22e-07	1.27e-05	Down	7.5588	8.48125	8.33343	4.86256	2.80649	3.42125	F12K8.12	uncharacterized protein LOC105435629 [Cucumis sativus]	GO:0016021,GO:0035673,GO:1904680,GO:0015333	integral component of membrane|oligopeptide transmembrane transporter activity|peptide transmembrane transporter activity|peptide:proton symporter activity
Csa4G645980	129.523	0.207702	-5.91631	0.426663	-1.22883	3.29e-09	1.04e-07	Down	8.63973	11.006	9.541	5.15643	4.40234	3.68	T19L18.15	abscisic acid receptor PYL2 [Cucumis sativus]	GO:0005737,GO:0005634,GO:0005886,GO:0010427,GO:0042802,GO:0042803,GO:0004864,GO:0038023,GO:0009738,GO:0080163	cytoplasm|nucleus|plasma membrane|abscisic acid binding|identical protein binding|protein homodimerization activity|protein phosphatase inhibitor activity|signaling receptor activity|abscisic acid-activated signaling pathway|regulation of protein serine/threonine phosphatase activity	csv04016,csv04075	MAPK signaling pathway - plant|Plant hormone signal transduction
Csa6G495830	120.819	0.217852	-5.63438	0.427069	-1.22746	1.76e-08	4.65e-07	Down	3.33784	5.05607	3.898	2.05216	1.66181	1.866	F6H11.30	ACT domain-containing protein ACR1 [Cucumis sativus]	GO:0005634,GO:0016597	nucleus|amino acid binding
Csa1G050230	130.176	0.260623	-4.70497	0.427435	-1.22622	2.54e-06	3.89e-05	Down	9.77202	20.1089	16.875	6.60158	9.14947	5.28091		hypothetical protein Csa_013100 [Cucumis sativus]
Csa3G150780	45.484	0.342557	-3.57901	0.427496	-1.22602	0.000344892	0.0027027	Down	3.5815	5.10102	3.99966	2.77973	1.49628	1.4924	MIL23.12	hypothetical protein Csa_010478 [Cucumis sativus]	GO:0005783,GO:0005789,GO:0016021,GO:0009705,GO:0009838,GO:0010256	endoplasmic reticulum|endoplasmic reticulum membrane|integral component of membrane|plant-type vacuole membrane|abscission|endomembrane system organization
Csa4G294400	24.5146	0.46165	-2.65364	0.427782	-1.22505	0.00796297	0.035428	Down	3.71925	2.44487	1.69183	1.34651	1.03295	1.24537		uncharacterized protein LOC101207834 [Cucumis sativus]
Csa4G056830	1678.94	0.157011	-7.79482	0.428133	-1.22387	6.45e-15	5.11e-13	Down	65.0219	55.9069	58.3396	33.6917	28.835	19.5376	GABA-T1	gamma aminobutyrate transaminase 1, mitochondrial [Cucumis sativus]	GO:0005739,GO:0034387,GO:0004015,GO:0102351,GO:0030170,GO:0009102	mitochondrion|4-aminobutyrate:pyruvate transaminase activity|adenosylmethionine-8-amino-7-oxononanoate transaminase activity|gamma-aminobutyrate transaminase (glyoxylate dependent) activity|pyridoxal phosphate binding|biotin biosynthetic process	csv00250,csv00650	Alanine, aspartate and glutamate metabolism|Butanoate metabolism
Csa6G014490	347.824	0.158541	-7.71888	0.428165	-1.22376	1.17e-14	8.85e-13	Down	12.0755	11.7159	11.3728	6.55536	5.16163	4.35619	F9F8.22	adenine/guanine permease AZG1 [Cucumis sativus]	GO:0016021,GO:0005886,GO:0005345,GO:0005215,GO:0015853,GO:0015854,GO:0006863	integral component of membrane|plasma membrane|purine nucleobase transmembrane transporter activity|transporter activity|adenine transport|guanine transport|purine nucleobase transport
Csa1G002030	639.041	0.129323	-9.45756	0.428368	-1.22308	3.15e-21	4.95e-19	Down	37.0267	36.7414	30.717	16.6219	16.0718	15.114	F1N21.16	F-box protein At1g67340 [Cucumis sativus]	GO:0005634,GO:0016567	nucleus|protein ubiquitination
Csa4G332100	112.28	0.221182	-5.52508	0.428673	-1.22205	3.29e-08	8.15e-07	Down	5.98434	6.3306	6.30455	3.40303	2.88548	2.20819	T20L15.110	transcription repressor OFP1 [Cucumis sativus]	GO:0005856,GO:0005730,GO:0003677,GO:0006281,GO:0045892,GO:0051510	cytoskeleton|nucleolus|DNA binding|DNA repair|negative regulation of transcription, DNA-templated|regulation of unidimensional cell growth
Csa6G487650	44.7396	0.36863	-3.30442	0.429845	-1.21811	0.000951722	0.00628018	Down	3.46027	2.90476	2.33369	2.10319	1.00697	0.901872	F27L4.3	calcium uniporter protein 3, mitochondrial [Cucumis sativus]	GO:0016021,GO:0005743,GO:0005262,GO:0015292,GO:0051560	integral component of membrane|mitochondrial inner membrane|calcium channel activity|uniporter activity|mitochondrial calcium ion homeostasis
Csa4G618510	77.3228	0.276255	-4.39582	0.430963	-1.21436	1.1e-05	0.000140428	Down	3.17244	2.60677	3.69554	1.71156	1.62661	1.00719	UGT73A1	anthocyanidin 3-O-glucosyltransferase 2 [Cucumis sativus]	GO:0047213,GO:0009718	anthocyanidin 3-O-glucosyltransferase activity|anthocyanin-containing compound biosynthetic process
Csa7G392370	55.385	0.330198	-3.67266	0.431459	-1.2127	0.000240043	0.00197382	Down	5.64086	5.09857	4.74787	3.70687	1.72158	1.72692	F28L1.7	uncharacterized protein LOC105436166 [Cucumis sativus]	GO:0005618,GO:0046872,GO:0030001	cell wall|metal ion binding|metal ion transport
Csa6G092560	306.529	0.154565	-7.84338	0.431576	-1.21231	4.39e-15	3.59e-13	Down	18.8234	22.9276	17.3168	9.76238	8.84706	8.5522	F14G9.23	protein SMALL AUXIN UP-REGULATED RNA 10 [Cucumis sativus]	GO:0005737,GO:0009734,GO:0007275,GO:0040008	cytoplasm|auxin-activated signaling pathway|multicellular organism development|regulation of growth	csv04075	Plant hormone signal transduction
Csa5G412760	1198.13	0.108229	-11.1673	0.432683	-1.20862	5.9e-29	1.38e-26	Down	67.5949	66.8468	63.9557	33.0855	30.5806	27.9488	F10B6.26	nudix hydrolase 18, mitochondrial [Cucumis sativus]	GO:0005737,GO:0005739,GO:0005634,GO:0016787,GO:0046872	cytoplasm|mitochondrion|nucleus|hydrolase activity|metal ion binding
Csa4G037610	194.195	0.194229	-6.21847	0.432926	-1.20781	5.02e-10	1.87e-08	Down	18.9039	16.3696	13.5444	8.60911	6.52387	7.53092	dl3310w	nuclear transcription factor Y subunit B [Cucumis sativus]	GO:0005634,GO:0003700,GO:0046982,GO:0043565,GO:0045893	nucleus|DNA-binding transcription factor activity|protein heterodimerization activity|sequence-specific DNA binding|positive regulation of transcription, DNA-templated
Csa5G168740	220.441	0.211284	-5.68746	0.434773	-1.20167	1.29e-08	3.52e-07	Down	5.99551	5.97189	6.69865	4.19666	2.29254	2.1777	Solyc07g008620.1.1	receptor-like protein EIX2 [Cucumis sativus]	GO:0016021,GO:0005886,GO:0050832	integral component of membrane|plasma membrane|defense response to fungus
Csa5G196560	762.071	0.115634	-10.3898	0.434849	-1.20141	2.76e-25	5.41e-23	Down	34.7894	32.1165	33.4375	16.3562	15.4333	14.8022	UGT8	7-deoxyloganetic acid glucosyltransferase [Cucumis sativus]	GO:0102970,GO:0035251,GO:1900994	7-deoxyloganetic acid glucosyltransferase activity|UDP-glucosyltransferase activity|(-)-secologanin biosynthetic process
Csa6G362970	36.4789	0.371505	-3.23241	0.435017	-1.20086	0.0012275	0.0077477	Down	1.11969	2.14119	1.94031	0.936473	0.730673	0.727123	F20D21.2	protein BIG GRAIN 1-like A [Cucumis sativus]	GO:0005886,GO:0060918,GO:0009734,GO:0010929	plasma membrane|auxin transport|auxin-activated signaling pathway|positive regulation of auxin mediated signaling pathway
Csa7G432210	27.2484	0.431345	-2.78314	0.435127	-1.20049	0.00538364	0.0258651	Down	4.86544	6.29669	6.16538	4.19646	1.71508	2.11792		hypothetical protein Csa_016736 [Cucumis sativus]
Csa6G072990	4019.13	0.130143	-9.194	0.436322	-1.19654	3.78e-20	5.21e-18	Down	138.98	129.633	125.298	77.0469	53.8444	53.1236	T1A4.50	inactive beta-amylase 9 [Cucumis sativus]	GO:0005737,GO:0016161,GO:0000272	cytoplasm|beta-amylase activity|polysaccharide catabolic process
Csa6G187390	233.945	0.167782	-7.13094	0.436349	-1.19645	9.97e-13	5.89e-11	Down	8.61105	7.85792	9.53715	4.56525	3.45534	4.09761		uncharacterized protein LOC101211174 [Cucumis sativus]
Csa3G117400	180.39	0.183832	-6.49588	0.437043	-1.19415	8.26e-11	3.53e-09	Down	10.7186	9.49669	8.80258	4.48596	4.69928	4.36931	T8B10.240	zinc finger protein ZAT1 [Cucumis sativus]	GO:0005634,GO:0003700,GO:0046872,GO:0044212,GO:0006355	nucleus|DNA-binding transcription factor activity|metal ion binding|transcription regulatory region DNA binding|regulation of transcription, DNA-templated
Csa5G146940	910.575	0.110921	-10.7524	0.437496	-1.19266	5.78e-27	1.21e-24	Down	73.5691	70.8726	68.6908	33.8535	30.6051	35.1832		PREDICTED: uncharacterized protein LOC103482871 [Cucumis melo]
Csa6G361300	585.288	0.136534	-8.72855	0.437773	-1.19175	2.58e-18	3.01e-16	Down	40.0717	33.1727	33.377	16.1149	16.6626	17.1748		vitellogenin-A2 [Cucumis sativus]
Csa3G170010	103.708	0.26567	-4.4813	0.438137	-1.19054	7.42e-06	9.97e-05	Down	0.935239	1.23222	1.32448	0.807678	0.438188	0.380112		uncharacterized protein LOC101213129 isoform X3 [Cucumis sativus]
Csa7G023950	43.3044	0.349204	-3.40619	0.438469	-1.18945	0.000658771	0.0046402	Down	4.09938	2.54709	3.38647	1.95174	1.26689	1.50428		hypothetical protein Csa_020438 [Cucumis sativus]
Csa7G049160	218.174	0.206895	-5.7314	0.439582	-1.1858	9.96e-09	2.78e-07	Down	18.8796	13.2809	19.7496	6.64884	9.85726	7.83281		hypothetical protein Csa_017160 [Cucumis sativus]
Csa1G073010	41.1722	0.393577	-3.01276	0.439596	-1.18575	0.00258887	0.0144036	Down	1.80561	4.35207	5.42349	1.64066	1.5087	2.22135		putative Glucose-fructose oxidoreductase domain-containing protein 2 [Cucumis melo var. makuwa]
Csa1G071840	22.943	0.454216	-2.61016	0.43965	-1.18557	0.00905012	0.0391663	Down	1.80219	1.37084	1.7132	0.894808	0.89764	0.496558	F18E5.60	transcription factor MYB102 [Cucumis sativus]	GO:0005634,GO:0003700,GO:0043565,GO:0044212,GO:0030154,GO:0006952,GO:0006355,GO:0009737,GO:0006970,GO:0009651,GO:0009611	nucleus|DNA-binding transcription factor activity|sequence-specific DNA binding|transcription regulatory region DNA binding|cell differentiation|defense response|regulation of transcription, DNA-templated|response to abscisic acid|response to osmotic stress|response to salt stress|response to wounding
Csa3G171230	56.5138	0.343443	-3.45014	0.439847	-1.18493	0.000560305	0.00404863	Down	5.33685	6.67606	6.7084	1.3028	3.59404	3.84076		uncharacterized protein LOC101206709 [Cucumis sativus]
Csa7G325150	107.614	0.265965	-4.44847	0.440393	-1.18314	8.65e-06	0.000113079	Down	12.0506	10.7888	10.0697	7.78406	4.16969	3.56474	F23N14.40	vacuolar iron transporter homolog 2 [Cucumis sativus]	GO:0016021,GO:0016020,GO:0005774,GO:0005381,GO:0005384,GO:0030026,GO:0006880	integral component of membrane|membrane|vacuolar membrane|iron ion transmembrane transporter activity|manganese ion transmembrane transporter activity|cellular manganese ion homeostasis|intracellular sequestering of iron ion
Csa1G542440	58.3552	0.299314	-3.94649	0.440972	-1.18124	7.93e-05	0.000764916	Down	1.80243	1.53288	2.10831	0.644874	0.924164	0.989799	F2P9.1	PREDICTED: transcription termination factor MTERF15, mitochondrial [Cucumis melo]	GO:0009507,GO:0005739,GO:0003690,GO:0003723,GO:0009658,GO:0032502,GO:0006353,GO:0006355,GO:0000394	chloroplast|mitochondrion|double-stranded DNA binding|RNA binding|chloroplast organization|developmental process|DNA-templated transcription, termination|regulation of transcription, DNA-templated|RNA splicing, via endonucleolytic cleavage and ligation
Csa6G012810	264.087	0.172683	-6.81998	0.442057	-1.1777	9.11e-12	4.57e-10	Down	12.6224	10.7585	9.9145	6.12345	4.82651	4.81397	T07M07.24	dehydration-responsive element-binding protein 2C isoform X2 [Cucumis sativus]	GO:0005634,GO:0003700,GO:0043565,GO:0044212,GO:0009738,GO:0010286,GO:0045893,GO:0009737	nucleus|DNA-binding transcription factor activity|sequence-specific DNA binding|transcription regulatory region DNA binding|abscisic acid-activated signaling pathway|heat acclimation|positive regulation of transcription, DNA-templated|response to abscisic acid
Csa4G025140	5592.4	0.108028	-10.9016	0.442062	-1.17768	1.13e-27	2.48e-25	Down	238.381	213.594	207.589	110.849	106.426	94.4348	T2I1_150	glutamate dehydrogenase 2 [Cucumis sativus]	GO:0005739,GO:0005774,GO:0005524,GO:0050897,GO:0005507,GO:0004352,GO:0004353,GO:0008270,GO:0006520,GO:0046686,GO:0009651	mitochondrion|vacuolar membrane|ATP binding|cobalt ion binding|copper ion binding|glutamate dehydrogenase (NAD+) activity|glutamate dehydrogenase [NAD(P)+] activity|zinc ion binding|cellular amino acid metabolic process|response to cadmium ion|response to salt stress	csv00220,csv00250,csv00910	Arginine biosynthesis|Alanine, aspartate and glutamate metabolism|Nitrogen metabolism
Csa2G378540	747.71	0.349877	-3.3654	0.442124	-1.17748	0.000764315	0.00521176	Down	27.0479	30.3307	34.0965	21.9867	10.0915	11.1445	PMA4	plasma membrane ATPase 4 [Cucumis sativus]	GO:0016021,GO:0005886,GO:0005524,GO:0046872,GO:0008553,GO:0120029	integral component of membrane|plasma membrane|ATP binding|metal ion binding|proton-exporting ATPase activity, phosphorylative mechanism|proton export across plasma membrane	csv00190	Oxidative phosphorylation
Csa5G139070	1248.03	0.133095	-8.84631	0.442147	-1.1774	9.05e-19	1.1e-16	Down	140.581	132.74	110.536	54.5274	67.3818	59.3112	MXC17.2	protein RESPONSE TO LOW SULFUR 2 [Cucumis sativus]	GO:0098869,GO:0010438,GO:0009658,GO:0042742,GO:0002229,GO:0045893,GO:0031347,GO:0047484,GO:0009651	cellular oxidant detoxification|cellular response to sulfur starvation|chloroplast organization|defense response to bacterium|defense response to oomycetes|positive regulation of transcription, DNA-templated|regulation of defense response|regulation of response to osmotic stress|response to salt stress
Csa5G606390	51.3411	0.332359	-3.53395	0.443025	-1.17454	0.000409395	0.00311393	Down	0.738642	1.16835	1.39199	0.644947	0.536527	0.362752	F16A14.26	phosphate transporter PHO1 homolog 3 isoform X1 [Cucumis sativus]	GO:0005794,GO:0016021,GO:0005886,GO:0005802,GO:0015114,GO:0016036,GO:0055062,GO:0006817,GO:0055069	Golgi apparatus|integral component of membrane|plasma membrane|trans-Golgi network|phosphate ion transmembrane transporter activity|cellular response to phosphate starvation|phosphate ion homeostasis|phosphate ion transport|zinc ion homeostasis
Csa7G407620	123.786	0.222681	-5.25611	0.444287	-1.17044	1.47e-07	3.14e-06	Down	10.722	13.6309	10.2366	6.61757	4.07992	5.70822		DUF4228 domain-containing protein [Cucumis melo var. makuwa]
Csa1G033240	122.314	0.212642	-5.50107	0.444495	-1.16976	3.77e-08	9.17e-07	Down	17.2206	15.8605	14.6585	8.80171	6.59792	7.29969		uncharacterized protein LOC101218201 [Cucumis sativus]
Csa2G372760	112.033	0.224388	-5.20673	0.444938	-1.16832	1.92e-07	3.97e-06	Down	4.21389	4.04711	4.40979	2.46146	1.99224	1.55393	F19C14.5	protein DETOXIFICATION 48 [Cucumis sativus]	GO:0005794,GO:0000139,GO:0017119,GO:0016021,GO:0005770,GO:0031902,GO:0043226,GO:0015297,GO:0015238,GO:0005381,GO:0006855,GO:0015893,GO:0055072,GO:0006826,GO:1905428,GO:0009737,GO:0009646,GO:0009408,GO:0009624,GO:0006970,GO:0010015	Golgi apparatus|Golgi membrane|Golgi transport complex|integral component of membrane|late endosome|late endosome membrane|organelle|antiporter activity|drug transmembrane transporter activity|iron ion transmembrane transporter activity|drug transmembrane transport|drug transport|iron ion homeostasis|iron ion transport|regulation of plant organ formation|response to abscisic acid|response to abse…
Csa2G433340	31.6748	0.388083	-3.00527	0.445565	-1.16629	0.00265345	0.0146984	Down	0.529269	0.905608	0.615042	0.365993	0.287336	0.316917	177O13.37	putative disease resistance protein RGA3 [Cucumis sativus]	GO:0043531,GO:0005524,GO:0006952	ADP binding|ATP binding|defense response
Csa3G020040	49.1082	0.328443	-3.53226	0.447467	-1.16015	0.000412025	0.00312617	Down	2.04434	2.71971	1.82192	0.928791	1.36432	0.834484	T20F21.27	putative glucuronosyltransferase PGSIP8 [Cucumis sativus]	GO:0016021,GO:0046872,GO:0016757,GO:0006486	integral component of membrane|metal ion binding|transferase activity, transferring glycosyl groups|protein glycosylation
Csa2G404770	619.267	0.168145	-6.89507	0.447708	-1.15937	5.38e-12	2.8e-10	Down	41.8729	31.3163	32.9785	21.6154	14.0559	15.4034		hypothetical protein Csa_022338 [Cucumis sativus]
Csa3G119240	92.6406	0.232247	-4.97981	0.448584	-1.15655	6.36e-07	1.13e-05	Down	5.16025	6.19988	5.23005	2.79262	2.80146	2.32321	F21F14.60	homeobox-leucine zipper protein ATHB-12 [Cucumis sativus]	GO:0005634,GO:0003700,GO:0043565,GO:0007275,GO:0045893,GO:0009737,GO:0006970,GO:0009615,GO:0009414	nucleus|DNA-binding transcription factor activity|sequence-specific DNA binding|multicellular organism development|positive regulation of transcription, DNA-templated|response to abscisic acid|response to osmotic stress|response to virus|response to water deprivation
Csa3G778280	65.3171	0.368615	-3.13606	0.448756	-1.156	0.00171236	0.0102292	Down	4.74672	6.53081	3.61542	3.49811	2.71679	0.887115		secoisolariciresinol dehydrogenase isoform X1 [Cucumis sativus]	GO:0102911,GO:0009807	(-)-secoisolariciresinol dehydrogenase activity|lignan biosynthetic process
Csa7G193750	26.4707	0.44485	-2.59554	0.449183	-1.15462	0.00944435	0.0405388	Down	1.48717	1.36409	0.898991	0.353541	0.780251	0.66705	F11F19.11	uncharacterized protein LOC101218998 [Cucumis sativus]	GO:0046658,GO:0009507,GO:0016021,GO:0009506,GO:0051607,GO:0010150,GO:0051707	anchored component of plasma membrane|chloroplast|integral component of membrane|plasmodesma|defense response to virus|leaf senescence|response to other organism
Csa2G295430	4388.98	0.0871954	-13.2135	0.449953	-1.15215	7.34e-40	2.58e-37	Down	205.234	209.673	220.071	109.69	93.8698	101.282	O0929	uncharacterized protein LOC101208096 isoform X1 [Cucumis sativus]	GO:0071627,GO:0015174,GO:0034488	integral component of fungal-type vacuolar membrane|basic amino acid transmembrane transporter activity|basic amino acid transmembrane export from vacuole
Csa4G280500	563.881	0.141763	-8.11914	0.450315	-1.15099	4.7e-16	4.31e-14	Down	28.7229	26.3973	30.3238	15.4712	14.4251	11.127	F6E13.26	hypothetical protein Csa_017941 [Cucumis sativus]	GO:0005829,GO:2000762	cytosol|regulation of phenylpropanoid metabolic process
Csa7G067430	34.9359	0.409067	-2.81188	0.450548	-1.15025	0.00492526	0.0241077	Down	0.625489	1.19239	1.21398	0.703331	0.470371	0.268086	K21L13.11	L-type lectin-domain containing receptor kinase IX.1 [Cucumis sativus]
Csa2G055050	62.6783	0.305063	-3.77043	0.450557	-1.15022	0.000162967	0.00142444	Down	2.2912	2.31713	2.99308	1.77161	0.994038	0.881295	MDL1	(R)-mandelonitrile lyase 1-like [Cucumis sativus]	GO:0033095,GO:0005773,GO:0050660,GO:0046593,GO:0016614	aleurone grain|vacuole|flavin adenine dinucleotide binding|mandelonitrile lyase activity|oxidoreductase activity, acting on CH-OH group of donors	csv00460	Cyanoamino acid metabolism
Csa6G042380	61.1987	0.295651	-3.87783	0.451724	-1.14649	0.000105391	0.000973085	Down	11.0003	9.20706	11.9694	6.66845	3.6727	5.20816		hypothetical protein Csa_005256 [Cucumis sativus]
Csa6G361410	36.8348	0.370873	-3.08689	0.452238	-1.14485	0.0020226	0.0117481	Down	1.83177	1.84819	2.79041	0.740286	1.13579	1.23243		uncharacterized protein LOC101211014 [Cucumis sativus]
Csa6G076720	1146.71	0.12334	-9.28178	0.452248	-1.14481	1.67e-20	2.4e-18	Down	119.713	119.385	139.31	59.6706	69.0686	53.2681	F17K2.19	MADS-box protein SOC1 [Cucumis sativus]	GO:0005737,GO:0005634,GO:0003700,GO:0046983,GO:0000977,GO:0043565,GO:0000982,GO:0008134,GO:0044212,GO:0030154,GO:0009908,GO:0010077,GO:0007275,GO:0009911,GO:0045944,GO:0045893,GO:0000060,GO:0009909,GO:0009409,GO:0009739,GO:0010048	cytoplasm|nucleus|DNA-binding transcription factor activity|protein dimerization activity|RNA polymerase II regulatory region sequence-specific DNA binding|sequence-specific DNA binding|transcription factor activity, RNA polymerase II proximal promoter sequence-specific DNA binding|transcription factor binding|transcription regulatory region DNA binding|cell differentiation|flower development|mai…
Csa1G587990	1323.76	0.112291	-10.1921	0.452353	-1.14448	2.15e-24	4.01e-22	Down	38.2763	46.8215	46.1969	23.8154	20.7349	18.6002		beta-galactosidase [Cucumis sativus]	GO:0048046,GO:0004565,GO:0005975	apoplast|beta-galactosidase activity|carbohydrate metabolic process
Csa4G618500	176.134	0.249294	-4.57593	0.453523	-1.14075	4.74e-06	6.71e-05	Down	6.63089	6.19155	5.30137	2.90131	4.14681	1.69552	GT3	anthocyanidin 3-O-glucosyltransferase 2 [Cucumis sativus]	GO:0016758	transferase activity, transferring hexosyl groups
Csa7G063960	188.129	0.216646	-5.26025	0.453881	-1.13961	1.44e-07	3.08e-06	Down	20.192	19.3655	21.4044	13.7874	9.05892	6.67666	UGT2	7-deoxyloganetin glucosyltransferase [Cucumis sativus]	GO:0035251	UDP-glucosyltransferase activity
Csa5G571460	1432.88	0.117648	-9.68465	0.453955	-1.13938	3.5e-22	5.79e-20	Down	71.1053	65.2359	59.7562	29.5798	33.3055	32.2231	F23N20.9	probable ribose-5-phosphate isomerase 1 [Cucumis sativus]	GO:0005737,GO:0005829,GO:0004751,GO:0030244,GO:0009052,GO:0080167,GO:0046109	cytoplasm|cytosol|ribose-5-phosphate isomerase activity|cellulose biosynthetic process|pentose-phosphate shunt, non-oxidative branch|response to karrikin|uridine biosynthetic process	csv00030,csv00710	Pentose phosphate pathway|Carbon fixation in photosynthetic organisms
Csa4G651800	222.978	0.162006	-7.03064	0.454072	-1.13901	2.06e-12	1.15e-10	Down	23.8095	25.2397	25.4315	12.6262	12.7495	10.6227	T21F11.22	VQ motif-containing protein 11 [Cucumis sativus]	GO:0005634	nucleus
Csa5G576820	65.212	0.269378	-4.22281	0.454537	-1.13753	2.41e-05	0.000273034	Down	4.52796	4.9779	4.43732	2.39411	2.40168	1.95184		uncharacterized protein LOC105435544 [Cucumis sativus]
Csa3G457670	41.2749	0.336714	-3.37756	0.454618	-1.13727	0.000731307	0.00504092	Down	2.46833	2.5293	3.2206	1.33581	1.09188	1.55578	F26P21.10	GATA transcription factor 4 [Cucumis sativus]	GO:0005634,GO:0003700,GO:0043565,GO:0008270,GO:0007623,GO:0045893,GO:0009416	nucleus|DNA-binding transcription factor activity|sequence-specific DNA binding|zinc ion binding|circadian rhythm|positive regulation of transcription, DNA-templated|response to light stimulus
Csa4G648590	856.304	0.135817	-8.37327	0.454632	-1.13723	5.6e-17	5.89e-15	Down	45.5693	63.31	63.5624	24.9868	25.7163	32.5169		uncharacterized protein LOC116403240 [Cucumis sativus]
Csa2G383340	31.1144	0.404843	-2.80657	0.454949	-1.13622	0.00500714	0.0244267	Down	2.71195	3.20889	4.02817	2.3762	1.35078	1.07932	F6A4.130	protein GLUTAMINE DUMPER 2 [Cucumis sativus]	GO:0016021,GO:0006865,GO:0080143	integral component of membrane|amino acid transport|regulation of amino acid export
Csa7G429630	599.184	0.126227	-8.97761	0.455897	-1.13322	2.77e-19	3.55e-17	Down	56.4202	60.9141	53.6713	30.4373	23.6136	29.2209		uncharacterized protein LOC101219783 [Cucumis sativus]
Csa4G050160	126.962	0.214494	-5.27439	0.456496	-1.13133	1.33e-07	2.87e-06	Down	10.8475	9.19099	8.21802	5.07066	4.24824	4.49738	MBK23.11	protein LURP-one-related 17 [Cucumis sativus]
Csa1G477510	107.843	0.216662	-5.21534	0.456927	-1.12997	1.83e-07	3.81e-06	Down	3.24902	3.65452	3.75348	1.59912	1.5795	2.01144	F8D20.50	plant-specific TFIIB-related protein PTF2 [Cucumis sativus]	GO:0005634,GO:0003690,GO:0046872,GO:0042803,GO:0070063,GO:0001093,GO:0009793,GO:0009846,GO:0006355,GO:0070897	nucleus|double-stranded DNA binding|metal ion binding|protein homodimerization activity|RNA polymerase binding|TFIIB-class transcription factor binding|embryo development ending in seed dormancy|pollen germination|regulation of transcription, DNA-templated|transcription preinitiation complex assembly
Csa4G286960	163.834	0.21997	-5.13097	0.457341	-1.12866	2.88e-07	5.67e-06	Down	6.27716	8.15742	7.26294	5.00173	2.70684	2.86287	LOX2	linoleate 13S-lipoxygenase 2-1, chloroplastic [Cucumis sativus]			csv00591,csv00592	Linoleic acid metabolism|alpha-Linolenic acid metabolism
Csa4G055470	52.3317	0.315374	-3.57524	0.457696	-1.12754	0.000349908	0.00272963	Down	10.8449	8.9112	12.5287	6.77476	4.94269	4.03485	T8E3.15	protein NUCLEAR FUSION DEFECTIVE 4 isoform X1 [Cucumis sativus]	GO:0016021,GO:0005739,GO:0000741,GO:0010197,GO:0009651	integral component of membrane|mitochondrion|karyogamy|polar nucleus fusion|response to salt stress
Csa1G569400	1241.73	0.10024	-11.2471	0.45774	-1.1274	2.39e-29	5.76e-27	Down	191.203	220.918	210.1	95.8545	98.7872	108.586	F15I1.15	dormancy-associated protein homolog 3 isoform X1 [Cucumis sativus]
Csa6G501320	52.8235	0.315225	-3.56992	0.458398	-1.12533	0.000357095	0.00277545	Down	5.57568	4.84134	7.61429	3.65796	2.64548	2.49675	CYP71AU50	cytochrome P450 CYP736A12-like [Cucumis sativus]
Csa3G777630	139.38	0.203648	-5.52489	0.458459	-1.12513	3.3e-08	8.15e-07	Down	12.6863	13.5941	10.6331	6.88112	5.84092	5.34027		uncharacterized protein LOC105434977 [Cucumis sativus]
Csa1G586850	182.845	0.176833	-6.36125	0.45854	-1.12488	2e-10	8.06e-09	Down	29.3508	35.9177	33.1057	18.4841	13.9742	15.5844		transcription factor KUA1 [Cucumis sativus]
Csa5G317890	2287.1	0.131362	-8.55899	0.458716	-1.12433	1.14e-17	1.24e-15	Down	71.6065	69.264	71.4088	38.5937	38.4134	26.7911	MQK4.9	probable acyl-activating enzyme 5, peroxisomal [Cucumis sativus]	GO:0005777,GO:0016874,GO:0006631	peroxisome|ligase activity|fatty acid metabolic process
Csa1G702010	146.306	0.257154	-4.37015	0.458884	-1.1238	1.24e-05	0.0001556	Down	13.0732	13.6409	14.7435	4.73744	10.3561	5.03993		hypothetical protein Csa_006991 [Cucumis sativus]
Csa1G150980	36.3136	0.380357	-2.95453	0.458891	-1.12378	0.00313146	0.0168028	Down	1.7779	2.35168	2.34451	1.10818	0.578079	1.48685		uncharacterized protein LOC101206510 [Cucumis sativus]
Csa1G002900	3030.57	0.10106	-11.078	0.460241	-1.11954	1.6e-28	3.67e-26	Down	77.9719	91.0375	82.3755	47.0241	36.7916	39.5282	T8H10.120	probable galactinol--sucrose galactosyltransferase 2 [Cucumis sativus]	GO:0009506,GO:0052692,GO:0016757,GO:0034484,GO:0010325,GO:0080167,GO:0006979	plasmodesma|raffinose alpha-galactosidase activity|transferase activity, transferring glycosyl groups|raffinose catabolic process|raffinose family oligosaccharide biosynthetic process|response to karrikin|response to oxidative stress
Csa6G517150	78.112	0.287471	-3.88668	0.460953	-1.11731	0.000101626	0.000945215	Down	3.41871	4.19649	3.55456	2.60319	1.78865	1.084	F19C24.9	dof zinc finger protein DOF1.4 [Cucumis sativus]	GO:0005634,GO:0003700,GO:0046872,GO:0044212,GO:0006355,GO:0010200	nucleus|DNA-binding transcription factor activity|metal ion binding|transcription regulatory region DNA binding|regulation of transcription, DNA-templated|response to chitin
Csa3G179190	33.0235	0.377163	-2.95719	0.461581	-1.11534	0.00310456	0.0166961	Down	0.949108	1.60432	1.1278	0.609843	0.583965	0.610184	MJM18.6	transcription factor TCP19 [Cucumis sativus]	GO:0005634,GO:0003700,GO:0043565,GO:0031347,GO:0006355	nucleus|DNA-binding transcription factor activity|sequence-specific DNA binding|regulation of defense response|regulation of transcription, DNA-templated
Csa4G640970	101.107	0.219401	-5.07701	0.462044	-1.1139	3.83e-07	7.33e-06	Down	4.37766	4.63864	4.48368	2.40446	2.21106	2.0303	F11C1.120	uncharacterized acetyltransferase At3g50280 [Cucumis sativus]	GO:0016747	transferase activity, transferring acyl groups other than amino-acyl groups
Csa1G305750	65.4402	0.276885	-4.02128	0.462194	-1.11343	5.79e-05	0.000585329	Down	2.08278	2.72847	3.18645	1.45994	1.312	1.14774	F28I16.200	probable receptor-like protein kinase At5g20050 [Cucumis sativus]
Csa5G600900	34.4643	0.368927	-3.01401	0.462668	-1.11195	0.0025782	0.0143526	Down	1.39969	1.62017	1.26549	0.83982	0.74887	0.521662	F26F24.26	F-box/kelch-repeat protein At1g23390 [Cucumis sativus]	GO:0005829,GO:0005634,GO:0043161	cytosol|nucleus|proteasome-mediated ubiquitin-dependent protein catabolic process
Csa6G516770	262.958	0.17937	-6.18855	0.463281	-1.11004	6.07e-10	2.24e-08	Down	6.3769	7.32016	6.76885	4.10578	3.55268	2.4272	F18E5.10	G-type lectin S-receptor-like serine/threonine-protein kinase B120 [Cucumis sativus]
Csa2G297180	83.1409	0.261399	-4.24595	0.46333	-1.10989	2.18e-05	0.000251252	Down	6.69465	8.25143	6.12282	4.43557	3.36899	2.59038	MXK3.3	probable WRKY transcription factor 51 [Cucumis sativus]	GO:0005634,GO:0003700,GO:0043565,GO:0042742,GO:0050832,GO:0009867	nucleus|DNA-binding transcription factor activity|sequence-specific DNA binding|defense response to bacterium|defense response to fungus|jasmonic acid mediated signaling pathway
Csa1G574820	49.7526	0.319205	-3.47559	0.463479	-1.10943	0.000509739	0.00375025	Down	2.4955	3.0758	3.52133	2.00433	1.27952	1.19372		cysteine synthase isoform X4 [Cucumis sativus]	GO:0005737,GO:0047458,GO:0004124,GO:0050461,GO:0050234,GO:0006535	cytoplasm|beta-pyrazolylalanine synthase activity|cysteine synthase activity|L-mimosine synthase activity|pyrazolylalanine synthase activity|cysteine biosynthetic process from serine	csv00270,csv00920	Cysteine and methionine metabolism|Sulfur metabolism
Csa4G618460	88.6073	0.257349	-4.30943	0.463607	-1.10903	1.64e-05	0.000196817	Down	3.737	6.32329	6.76364	2.64103	2.64939	2.96608	MKA23.7	VQ motif-containing protein 22 [Cucumis sativus]	GO:0005634	nucleus
Csa1G525300	3105.29	0.105732	-10.4755	0.464066	-1.1076	1.12e-25	2.26e-23	Down	294.306	268.625	267.341	150.692	121.933	139.725		uncharacterized protein LOC101213402 [Cucumis sativus]
Csa5G601620	48.7429	0.335319	-3.30126	0.464267	-1.10697	0.000962525	0.00634739	Down	0.983473	1.87182	1.73596	0.841674	0.844338	0.563658	T13D8.8	U-box domain-containing protein 19 [Cucumis sativus]	GO:0005737,GO:0005634,GO:0004842,GO:0010029	cytoplasm|nucleus|ubiquitin-protein transferase activity|regulation of seed germination
	202.879	0.175039	-6.31641	0.464703	-1.10562	2.68e-10	1.05e-08	Down	9.51751	9.15568	8.7234	5.05097	4.69289	3.83759	MUB3.18	U-box domain-containing protein 27 [Cucumis sativus]	GO:0004842,GO:0010200	ubiquitin-protein transferase activity|response to chitin
Csa1G011540	35.9373	0.369211	-2.99444	0.464715	-1.10558	0.00274947	0.0150765	Down	1.71336	2.30752	2.12905	1.06796	1.2856	0.671662	MFB13.4	transcription factor UNE10 [Cucumis sativus]	GO:0016607,GO:0005634,GO:0003700,GO:0003690,GO:0046983,GO:0009704,GO:0009585,GO:0006355,GO:0009416	nuclear speck|nucleus|DNA-binding transcription factor activity|double-stranded DNA binding|protein dimerization activity|de-etiolation|red, far-red light phototransduction|regulation of transcription, DNA-templated|response to light stimulus
Csa6G014540	811.539	0.135845	-8.11196	0.46588	-1.10197	4.98e-16	4.55e-14	Down	78.6838	66.086	71.184	41.3214	35.4729	30.8178	T2P4.4	expansin-A8 [Cucumis sativus]
Csa1G004040	2604.65	0.337405	-3.26256	0.466256	-1.10081	0.00110409	0.0071128	Down	180.526	158.407	158.045	121.425	61.6756	65.8041	CYP736A117	cytochrome P450 71A22 [Cucumis sativus]
Csa1G534780	201.851	0.168615	-6.52594	0.466397	-1.10037	6.76e-11	2.94e-09	Down	22.2198	24.3633	26.6144	11.1751	13.0333	12.0948		hypothetical protein Csa_023250 [Cucumis sativus]
Csa3G822360	671.996	0.115358	-9.5156	0.467262	-1.0977	1.81e-21	2.91e-19	Down	11.9227	12.7965	11.3543	6.20172	6.04552	5.72342	177O13.37	disease resistance protein RGA2 [Cucumis sativus]	GO:0043531,GO:0005524,GO:0006952	ADP binding|ATP binding|defense response
Csa2G423560	2040.05	0.10181	-10.7709	0.467622	-1.09658	4.72e-27	9.98e-25	Down	187.092	177.495	168.888	93.6508	87.6752	85.1961	At3g21890	hypothetical protein Csa_022167 [Cucumis sativus]	GO:0005634,GO:0003700,GO:0030674,GO:0008270,GO:0007623,GO:0009909,GO:0006355,GO:0010224	nucleus|DNA-binding transcription factor activity|protein binding, bridging|zinc ion binding|circadian rhythm|regulation of flower development|regulation of transcription, DNA-templated|response to UV-B
Csa2G060490	24.5698	0.424242	-2.57469	0.469017	-1.09229	0.0100331	0.0425473	Down	2.4795	2.52636	3.26551	1.26731	1.35607	1.50552		uncharacterized protein LOC105434722 [Cucumis sativus]
Csa6G008710	186.998	0.191753	-5.6948	0.469112	-1.092	1.24e-08	3.4e-07	Down	12.2719	15.3204	12.5405	8.18366	5.02295	6.8851		uncharacterized protein LOC105435737 [Cucumis sativus]
Csa3G853160	81.8736	0.259054	-4.21207	0.469385	-1.09116	2.53e-05	0.000284308	Down	2.98008	3.53814	3.636	2.23811	1.55916	1.27075	CYP82D61	cytochrome P450 CYP82D47 isoform X1 [Cucumis sativus]
Csa5G190520	88.0159	0.279987	-3.89682	0.469417	-1.09106	9.75e-05	0.000911423	Down	4.37703	3.14403	2.77277	2.34087	1.45653	1.39769	UGT8	7-deoxyloganetic acid glucosyltransferase [Cucumis sativus]	GO:0102970,GO:0035251,GO:1900994	7-deoxyloganetic acid glucosyltransferase activity|UDP-glucosyltransferase activity|(-)-secologanin biosynthetic process
Csa4G053250	1859.98	0.12345	-8.82751	0.46984	-1.08976	1.07e-18	1.29e-16	Down	54.5485	49.6851	51.0852	31.4695	23.038	23.587	T19F6.19	cellulose synthase-like protein G3 isoform X1 [Cucumis sativus]	GO:0005794,GO:0000139,GO:0016021,GO:0005886,GO:0005802,GO:0016760,GO:0016759,GO:0071555,GO:0030244,GO:0009833	Golgi apparatus|Golgi membrane|integral component of membrane|plasma membrane|trans-Golgi network|cellulose synthase (UDP-forming) activity|cellulose synthase activity|cell wall organization|cellulose biosynthetic process|plant-type primary cell wall biogenesis
Csa1G574980	30.1092	0.393212	-2.76933	0.470109	-1.08893	0.00561718	0.026713	Down	0.957144	1.40136	1.20628	0.533683	0.743572	0.497253	F19B15.170	protein DETOXIFICATION 51 [Cucumis sativus]	GO:0010008,GO:0016021,GO:0005770,GO:0031902,GO:0015297,GO:0015238,GO:0010252,GO:0006952,GO:0006855,GO:0031348,GO:0046620,GO:0010015	endosome membrane|integral component of membrane|late endosome|late endosome membrane|antiporter activity|drug transmembrane transporter activity|auxin homeostasis|defense response|drug transmembrane transport|negative regulation of defense response|regulation of organ growth|root morphogenesis
Csa2G367210	53.2871	0.316019	-3.43469	0.471252	-1.08543	0.000593227	0.00425098	Down	3.30864	3.56692	2.66036	2.02931	1.67382	1.0872	T2N18.3	cytokinin riboside 5'-monophosphate phosphoribohydrolase LOG1 [Cucumis sativus]	GO:0005829,GO:0005634,GO:0016799,GO:0009691	cytosol|nucleus|hydrolase activity, hydrolyzing N-glycosyl compounds|cytokinin biosynthetic process
Csa7G388390	31.8641	0.392627	-2.74861	0.473298	-1.07918	0.0059849	0.0281074	Down	1.13351	1.8885	2.07264	1.0788	0.761558	0.711987		uncharacterized protein LOC101203661 [Cucumis sativus]
Csa3G081920	181.457	0.17943	-6.00216	0.474025	-1.07696	1.95e-09	6.59e-08	Down	3.04363	3.01337	3.07416	1.67628	1.64337	1.29119	MOJ9.14	protein unc-13 homolog [Cucumis sativus]	GO:0005737,GO:0005886,GO:0009506,GO:0010118	cytoplasm|plasma membrane|plasmodesma|stomatal movement
Csa6G104640	124.067	0.212832	-5.05492	0.474392	-1.07585	4.31e-07	8.15e-06	Down	9.49865	12.2532	14.3315	6.71654	5.49277	5.96896	dl4400c	ethylene-responsive transcription factor ERF039 [Cucumis sativus]	GO:0005634,GO:0003677,GO:0003700,GO:0009873	nucleus|DNA binding|DNA-binding transcription factor activity|ethylene-activated signaling pathway
Csa4G026920	73.9669	0.265982	-4.04358	0.4745	-1.07552	5.26e-05	0.000539786	Down	8.89561	12.8991	9.68436	5.24204	6.11719	4.4855		uncharacterized protein LOC116406103 [Cucumis sativus]
Csa1G448920	119.809	0.222033	-4.83564	0.475109	-1.07367	1.33e-06	2.2e-05	Down	4.4126	4.80198	3.83262	2.6404	1.65547	2.33523	MPL12.2	potassium channel KAT3 [Cucumis sativus]	GO:0016021,GO:0005886,GO:0042802,GO:0005242,GO:0034765	integral component of membrane|plasma membrane|identical protein binding|inward rectifier potassium channel activity|regulation of ion transmembrane transport
Csa2G352420	84.3029	0.280195	-3.82735	0.475525	-1.07241	0.000129528	0.00116318	Down	3.67622	3.62487	6.3982	2.90014	1.92589	2.09799	F6F22.16	hypothetical protein Csa_018765 [Cucumis sativus]	GO:0005886,GO:0003677,GO:0003700,GO:0046872,GO:0003727,GO:0006355,GO:0006979	plasma membrane|DNA binding|DNA-binding transcription factor activity|metal ion binding|single-stranded RNA binding|regulation of transcription, DNA-templated|response to oxidative stress
Csa3G893950	349.669	0.153187	-6.97604	0.476769	-1.06864	3.04e-12	1.64e-10	Down	6.79314	7.62428	7.76289	4.56009	3.61147	3.08598	F21M12.36	receptor-like protein kinase 7 [Cucumis sativus]	GO:0016021,GO:0005886,GO:0009506,GO:0005524,GO:0042802,GO:0001653,GO:0004672,GO:0004674,GO:0045087,GO:0046777,GO:0006979,GO:0009845	integral component of membrane|plasma membrane|plasmodesma|ATP binding|identical protein binding|peptide receptor activity|protein kinase activity|protein serine/threonine kinase activity|innate immune response|protein autophosphorylation|response to oxidative stress|seed germination
Csa3G116840	29.8383	0.391806	-2.72735	0.476784	-1.06859	0.00638454	0.0296168	Down	1.11603	1.39173	1.46753	0.603971	0.841504	0.562743	F8L15_160	zinc finger CCCH domain-containing protein 19 [Cucumis sativus]	GO:0003677	DNA binding
Csa1G374520	81.251	0.26012	-4.10754	0.47683	-1.06845	4e-05	0.000423067	Down	4.34067	3.72522	5.13999	2.67051	1.68981	2.36859	T29J13.20	probable sulfate transporter 3.5 isoform X1 [Cucumis sativus]	GO:0016021,GO:0015301,GO:0008271,GO:0015116,GO:0015293	integral component of membrane|anion:anion antiporter activity|secondary active sulfate transmembrane transporter activity|sulfate transmembrane transporter activity|symporter activity
Csa2G245410	3537.61	0.114757	-9.30955	0.476869	-1.06834	1.28e-20	1.86e-18	Down	125.507	131.226	107.865	70.2904	53.2183	62.4424	MVE11.10	polyol transporter 5 [Cucumis sativus]	GO:0005887,GO:0005886,GO:0005351,GO:0015591,GO:0015148,GO:0005354,GO:0005355,GO:0015168,GO:0015575,GO:0015145,GO:0005365,GO:0015576,GO:0008645,GO:0010311	integral component of plasma membrane|plasma membrane|carbohydrate:proton symporter activity|D-ribose transmembrane transporter activity|D-xylose transmembrane transporter activity|galactose transmembrane transporter activity|glucose transmembrane transporter activity|glycerol transmembrane transporter activity|mannitol transmembrane transporter activity|monosaccharide transmembrane transporter a…
Csa2G372180	333.381	0.156326	-6.82103	0.47754	-1.06631	9.04e-12	4.55e-10	Down	10.4674	8.38725	9.77503	4.44563	4.96251	5.20816	T28P6.20	putative pentatricopeptide repeat-containing protein At5g52630 [Cucumis sativus]
Csa3G852610	2616.13	0.13595	-7.83975	0.477703	-1.06582	4.51e-15	3.68e-13	Down	140.636	157.707	160.176	100.664	69.778	63.1245	CYP82D61	cytochrome P450 CYP82D47 [Cucumis sativus]
Csa2G361540	94.0444	0.238289	-4.4667	0.478182	-1.06437	7.94e-06	0.000105414	Down	2.49462	3.44368	2.71165	1.76187	1.23256	1.4094	22H5.14	uncharacterized membrane protein At1g75140 [Cucumis sativus]	GO:0005783,GO:0016021	endoplasmic reticulum|integral component of membrane
Csa3G171170	417.285	0.141607	-7.51025	0.478469	-1.0635	5.9e-14	4.12e-12	Down	19.4136	19.1062	23.5111	9.50914	10.4441	11.6616	F11A17.15	diacylglycerol O-acyltransferase 3 [Cucumis sativus]	GO:0005829,GO:0051539,GO:0004144,GO:0010181,GO:0051287,GO:0016651,GO:0006071,GO:0019432	cytosol|4 iron, 4 sulfur cluster binding|diacylglycerol O-acyltransferase activity|FMN binding|NAD binding|oxidoreductase activity, acting on NAD(P)H|glycerol metabolic process|triglyceride biosynthetic process	csv00561	Glycerolipid metabolism
Csa2G119350	54.4078	0.290972	-3.65258	0.478702	-1.0628	0.000259622	0.00211378	Down	2.86072	2.93995	3.05819	1.6475	1.23954	1.64057	K10A8_80	RING-H2 finger protein ATL52 [Cucumis sativus]	GO:0016021,GO:0046872,GO:0016740,GO:0016567	integral component of membrane|metal ion binding|transferase activity|protein ubiquitination
Csa1G050270	166.667	0.19584	-5.42514	0.478815	-1.06246	5.79e-08	1.36e-06	Down	10.0107	8.15061	9.71745	4.20367	5.45225	4.58434		uncharacterized protein LOC101213560 [Cucumis sativus]
Csa7G098730	436.165	0.147666	-7.19159	0.478982	-1.06196	6.4e-13	3.85e-11	Down	42.8607	43.8581	37.1	25.324	18.9088	19.1545		hypothetical protein Csa_018201 [Cucumis sativus]
Csa2G351550	147.417	0.198729	-5.34176	0.479113	-1.06156	9.2e-08	2.05e-06	Down	6.20247	7.11726	8.3346	3.11455	3.94271	3.96427	F1N21.16	F-box protein At1g67340 [Cucumis sativus]	GO:0005634,GO:0016567	nucleus|protein ubiquitination
Csa4G288070	58.2716	0.303865	-3.48153	0.480326	-1.05791	0.000498553	0.00368507	Down	3.86639	2.80913	2.83518	1.87216	1.75288	1.26466	LOX-H1	linoleate 13S-lipoxygenase 2-1, chloroplastic [Cucumis sativus]	GO:0009570,GO:0009534,GO:0016165,GO:0046872,GO:0010597,GO:0031408	chloroplast stroma|chloroplast thylakoid|linoleate 13S-lipoxygenase activity|metal ion binding|green leaf volatile biosynthetic process|oxylipin biosynthetic process	csv00591,csv00592	Linoleic acid metabolism|alpha-Linolenic acid metabolism
Csa4G664420	93.5231	0.340137	-3.10487	0.480937	-1.05608	0.00190365	0.0111788	Down	4.39844	3.08409	4.77648	3.66358	0.968909	1.71063	F2D10.37	cysteine protease XCP2 [Cucumis sativus]	GO:0005618,GO:0005615,GO:0005764,GO:0005886,GO:0004197,GO:0042742,GO:0010623,GO:0051603	cell wall|extracellular space|lysosome|plasma membrane|cysteine-type endopeptidase activity|defense response to bacterium|programmed cell death involved in cell development|proteolysis involved in cellular protein catabolic process
Csa3G750890	54.7586	0.309002	-3.41736	0.480973	-1.05597	0.000632322	0.0044905	Down	1.51854	2.84492	2.3999	1.05556	1.21462	1.17153	F17C15.120	PAN domain-containing protein At5g03700 [Cucumis sativus]	GO:0005768,GO:0005794,GO:0016021,GO:0005886,GO:0005802,GO:0048544	endosome|Golgi apparatus|integral component of membrane|plasma membrane|trans-Golgi network|recognition of pollen
Csa3G128900	62.101	0.325483	-3.24196	0.481229	-1.0552	0.00118711	0.00754535	Down	1.72197	3.02962	3.79143	1.76025	0.934845	1.66421	F27H5_10	E3 ubiquitin-protein ligase ATL4 [Cucumis sativus]	GO:0016021,GO:0046872,GO:0031625,GO:0004842,GO:0016567	integral component of membrane|metal ion binding|ubiquitin protein ligase binding|ubiquitin-protein transferase activity|protein ubiquitination
Csa2G076000	114.153	0.227274	-4.64214	0.481286	-1.05503	3.45e-06	5.09e-05	Down	6.70949	6.20229	6.3657	4.11518	3.31116	2.4713		uncharacterized protein LOC101218582 [Cucumis sativus]
Csa3G047820	264.54	0.160291	-6.57959	0.481414	-1.05465	4.72e-11	2.13e-09	Down	10.2678	9.94929	11.3526	6.41254	4.91566	4.88272	MDF20.14	inactive beta-amylase 4, chloroplastic [Cucumis sativus]	GO:0009507,GO:0005983	chloroplast|starch catabolic process
Csa2G384460	181.311	0.19388	-5.41871	0.482775	-1.05058	6e-08	1.41e-06	Down	12.7905	14.5145	13.0121	8.45353	7.12344	5.1394		cyclin-dependent protein kinase inhibitor SMR1 [Cucumis sativus]
Csa6G183190	7733.13	0.101165	-10.3723	0.483197	-1.04932	3.31e-25	6.43e-23	Down	217.068	218.204	269.549	127.271	109.061	126.746	AS1	asparagine synthetase [Cucumis melo var. makuwa]	GO:0004066,GO:0005524,GO:0006541,GO:0070981	asparagine synthase (glutamine-hydrolyzing) activity|ATP binding|glutamine metabolic process|L-asparagine biosynthetic process	csv00250	Alanine, aspartate and glutamate metabolism
Csa2G252070	5984.37	0.131751	-7.94346	0.484122	-1.04656	1.97e-15	1.68e-13	Down	186.478	163.742	177.824	115.228	79.2401	79.3362	T4L20.320	amidophosphoribosyltransferase, chloroplastic [Cucumis sativus]	GO:0009507,GO:0009570,GO:0009532,GO:0004044,GO:0051536,GO:0046872,GO:0006189,GO:0009658,GO:0006541,GO:0009116,GO:0009113,GO:0006164	chloroplast|chloroplast stroma|plastid stroma|amidophosphoribosyltransferase activity|iron-sulfur cluster binding|metal ion binding|'de novo' IMP biosynthetic process|chloroplast organization|glutamine metabolic process|nucleoside metabolic process|purine nucleobase biosynthetic process|purine nucleotide biosynthetic process	csv00230,csv00250	Purine metabolism|Alanine, aspartate and glutamate metabolism
Csa7G352410	381.646	0.150295	-6.94951	0.484822	-1.04447	3.67e-12	1.96e-10	Down	16.5427	18.0824	18.4569	8.43755	10.9079	7.99316	MEB5.2	UV-B-induced protein At3g17800, chloroplastic [Cucumis sativus]	GO:0009507,GO:0010193,GO:0010224,GO:0009611	chloroplast|response to ozone|response to UV-B|response to wounding
Csa2G006790	3195.1	0.0939662	-11.1143	0.484856	-1.04437	1.07e-28	2.48e-26	Down	81.8179	77.8418	76.6809	42.9103	38.7018	40.8342	F18G18.90	EIN3-binding F-box protein 1 [Cucumis sativus]	GO:0005634,GO:0019005,GO:0009873,GO:0010105,GO:0016567,GO:0009723,GO:0031146,GO:0006511	nucleus|SCF ubiquitin ligase complex|ethylene-activated signaling pathway|negative regulation of ethylene-activated signaling pathway|protein ubiquitination|response to ethylene|SCF-dependent proteasomal ubiquitin-dependent protein catabolic process|ubiquitin-dependent protein catabolic process	csv04016,csv04075	MAPK signaling pathway - plant|Plant hormone signal transduction
Csa2G428380	333.093	0.156581	-6.62916	0.487002	-1.038	3.38e-11	1.57e-09	Down	15.4487	21.7378	18.9278	9.77402	10.7897	8.41089	T20D16.5	probable WRKY transcription factor 15-like [Cucumis sativus]	GO:0005634,GO:0005516,GO:0003700,GO:0043565,GO:0044212,GO:0010200	nucleus|calmodulin binding|DNA-binding transcription factor activity|sequence-specific DNA binding|transcription regulatory region DNA binding|response to chitin
Csa5G140470	290.844	0.17361	-5.97842	0.487032	-1.03791	2.25e-09	7.53e-08	Down	41.7412	52.8197	41.1094	19.0825	22.2343	29.0719		hypothetical protein Csa_000564 [Cucumis sativus]
Csa1G222880	109.712	0.258174	-4.00689	0.488193	-1.03448	6.15e-05	0.000616242	Down	4.73359	6.16773	4.00767	2.76503	3.2592	1.70277		hypothetical protein Csa_004579 [Cucumis sativus]
Csa4G112650	319.802	0.210864	-4.90575	0.488203	-1.03445	9.31e-07	1.59e-05	Down	15.8453	15.3319	16.3209	10.5208	9.41515	4.76026	OJ1113_A10.32	protein DMR6-LIKE OXYGENASE 2 [Cucumis sativus]
Csa3G822110	46.2242	0.314496	-3.28781	0.488354	-1.034	0.00100972	0.00660326	Down	8.12498	8.27416	8.30936	4.49318	4.78058	3.56801		hypothetical protein Csa_002698 [Cucumis sativus]
Csa1G109330	490.102	0.182158	-5.66946	0.488782	-1.03274	1.43e-08	3.86e-07	Down	18.2608	16.8233	18.448	13.1503	6.84749	8.03104	F14D17.80	serine carboxypeptidase-like [Cucumis sativus]	GO:0005576,GO:0005773,GO:0004185,GO:0051603	extracellular region|vacuole|serine-type carboxypeptidase activity|proteolysis involved in cellular protein catabolic process
Csa6G398200	88.2631	0.248175	-4.15818	0.489046	-1.03196	3.21e-05	0.000351101	Down	4.89623	4.87094	5.72714	3.26223	1.92767	2.90422		uncharacterized protein LOC105435860 [Cucumis sativus]
Csa3G481240	72.5178	0.268209	-3.84642	0.489152	-1.03164	0.000119855	0.00108918	Down	7.52115	8.55703	7.9919	4.05538	5.25478	3.18816		hypothetical protein Csa_023395 [Cucumis sativus]
Csa4G652040	229.626	0.162035	-6.36343	0.489338	-1.0311	1.97e-10	7.96e-09	Down	4.62727	4.90406	4.97479	2.86382	2.11431	2.59712	MBG8_9	cytochrome b561, DM13 and DOMON domain-containing protein At5g54830 [Cucumis sativus]	GO:0005768,GO:0005794,GO:0016021,GO:0005802,GO:0046872,GO:0055114	endosome|Golgi apparatus|integral component of membrane|trans-Golgi network|metal ion binding|oxidation-reduction process
Csa3G585940	32.638	0.39054	-2.63864	0.489543	-1.03049	0.00832403	0.036674	Down	10.4541	10.7376	7.24636	6.67905	3.57343	4.66735		hypothetical protein Csa_017506 [Cucumis sativus]
Csa7G426520	46.6764	0.327121	-3.14917	0.489656	-1.03016	0.00163733	0.00988167	Down	1.35278	1.1499	1.8673	0.810636	0.645778	0.824722	177O13.34	putative disease resistance protein RGA4 [Cucumis sativus]	GO:0043531,GO:0005524,GO:0006952	ADP binding|ATP binding|defense response
Csa5G149880	4949.01	0.0987928	-10.4256	0.489717	-1.02998	1.89e-25	3.75e-23	Down	126.31	148.466	139.21	82.0344	62.9697	71.1071	T19F6.15	probable trehalase [Cucumis sativus]	GO:0016021,GO:0005886,GO:0004555,GO:0005993	integral component of membrane|plasma membrane|alpha,alpha-trehalase activity|trehalose catabolic process	csv00500	Starch and sucrose metabolism
Csa7G234730	540.107	0.119094	-8.64004	0.490057	-1.02898	5.62e-18	6.29e-16	Down	10.0262	11.347	11.0781	6.21063	5.29421	5.4357	T9J14.14	probable serine/threonine-protein kinase WNK9 [Cucumis sativus]	GO:0005737,GO:0016020,GO:0005524,GO:0004672,GO:0004674,GO:0007623,GO:0035556,GO:0006468	cytoplasm|membrane|ATP binding|protein kinase activity|protein serine/threonine kinase activity|circadian rhythm|intracellular signal transduction|protein phosphorylation
Csa4G062370	34.029	0.387632	-2.65337	0.490209	-1.02853	0.00796931	0.0354397	Down	10.5296	8.89932	9.83089	7.68833	3.96651	3.68409		hypothetical protein Csa_015149 [Cucumis sativus]
Csa4G308650	416.311	0.128753	-7.98474	0.490369	-1.02806	1.41e-15	1.22e-13	Down	15.7189	16.7049	16.162	8.92685	8.62675	7.82883	MZB10.6	BTB/POZ domain-containing protein At3g09030 [Cucumis sativus]
Csa3G822390	39.2137	0.392867	-2.60899	0.491415	-1.02499	0.009081	0.0392808	Down	4.69771	3.56315	3.00578	1.62534	3.03862	1.23904	F20H23.21	LOB domain-containing protein 20 [Cucumis sativus]	GO:0005634,GO:0009867,GO:0045893,GO:1900150,GO:0009753	nucleus|jasmonic acid mediated signaling pathway|positive regulation of transcription, DNA-templated|regulation of defense response to fungus|response to jasmonic acid
Csa4G038680	4942.53	0.090005	-11.3805	0.491649	-1.0243	5.23e-30	1.31e-27	Down	1011.41	1118.49	998.532	523.162	532.433	583.766
Csa2G377870	196.638	0.221849	-4.61557	0.491764	-1.02396	3.92e-06	5.67e-05	Down	9.55761	9.64585	10.3271	7.58616	4.34318	3.57432		uncharacterized protein LOC101214952 [Cucumis sativus]
Csa7G047320	150.934	0.202209	-5.05301	0.492513	-1.02177	4.35e-07	8.2e-06	Down	4.99219	4.85409	4.08517	2.97684	2.08564	2.27834	F21B7.18	pentatricopeptide repeat-containing protein At1g03560, mitochondrial [Cucumis sativus]
Csa7G290540	279.342	0.149318	-6.83887	0.492718	-1.02117	7.98e-12	4.06e-10	Down	9.1202	10.0615	10.4171	5.891	4.63555	5.01363	F14O23.25	protein DETOXIFICATION 54 [Cucumis sativus]	GO:0016021,GO:0005778,GO:0015297,GO:0015238,GO:0006855	integral component of membrane|peroxisomal membrane|antiporter activity|drug transmembrane transporter activity|drug transmembrane transport
Csa6G509050	59.4206	0.285881	-3.56927	0.492984	-1.02039	0.000357977	0.00277775	Down	1.65068	1.79244	1.52075	0.72621	1.02848	0.850772	T17A5.12	probable acyl-activating enzyme 2 isoform X1 [Cucumis sativus]	GO:0016874,GO:0006631	ligase activity|fatty acid metabolic process
Csa1G264020	401.34	0.135026	-7.55178	0.493224	-1.01969	4.29e-14	3.05e-12	Down	11.438	14.1995	13.4579	6.50394	7.37122	6.6093		uncharacterized serine-rich protein C215.13 [Cucumis sativus]
Csa6G495020	3535.62	0.107573	-9.47866	0.493237	-1.01965	2.58e-21	4.08e-19	Down	218.161	211.656	180.879	115.399	101.826	104.914	K8K14.16	LOB domain-containing protein 37 [Cucumis sativus]	GO:0006807,GO:0060776	nitrogen compound metabolic process|simple leaf morphogenesis
Csa6G454360	171.553	0.213922	-4.764	0.493416	-1.01912	1.9e-06	3e-05	Down	6.94534	9.21891	10.1575	4.9542	5.55687	3.2303		secoisolariciresinol dehydrogenase [Cucumis sativus]	GO:0102911,GO:0000166,GO:0009807,GO:0051289	(-)-secoisolariciresinol dehydrogenase activity|nucleotide binding|lignan biosynthetic process|protein homotetramerization
Csa6G111910	73.6621	0.273772	-3.71512	0.494111	-1.01709	0.000203111	0.00171083	Down	1.86252	1.7994	1.87785	1.34621	0.829572	0.745867	F10M23.20	pentatricopeptide repeat-containing protein At4g26680, mitochondrial [Cucumis sativus]
Csa3G127030	656.881	0.127093	-7.99604	0.494402	-1.01624	1.28e-15	1.13e-13	Down	32.2632	40.293	44.9433	21.7288	20.7465	19.195	F16B22.23	cyclin-U4-1 [Cucumis sativus]	GO:0019901,GO:0007049,GO:0051301,GO:0000079	protein kinase binding|cell cycle|cell division|regulation of cyclin-dependent protein serine/threonine kinase activity
Csa3G000690	42.5547	0.35433	-2.8665	0.494593	-1.01569	0.00415035	0.0210856	Down	2.77482	1.53669	2.09465	1.01026	1.09141	1.30333	K2A18.4	protein PIN-LIKES 7 [Cucumis sativus]	GO:0005789,GO:0016021,GO:0009734,GO:0009733,GO:0055085	endoplasmic reticulum membrane|integral component of membrane|auxin-activated signaling pathway|response to auxin|transmembrane transport
Csa4G652140	51.3515	0.301312	-3.36947	0.494739	-1.01526	0.000753134	0.00517076	Down	2.1882	1.92118	2.02582	1.04182	0.952898	1.25263		uncharacterized protein LOC101215936 [Cucumis sativus]
Csa3G173020	1699.12	0.137456	-7.38589	0.494748	-1.01523	1.51e-13	1e-11	Down	49.9018	46.4758	45.6935	30.4566	25.0272	19.6356	T1O24	electron transfer flavoprotein-ubiquinone oxidoreductase, mitochondrial [Cucumis sativus]	GO:0031305,GO:0005739,GO:0051539,GO:0009055,GO:0004174,GO:0046872,GO:0043783,GO:0048039,GO:0006552,GO:0009646	integral component of mitochondrial inner membrane|mitochondrion|4 iron, 4 sulfur cluster binding|electron transfer activity|electron-transferring-flavoprotein dehydrogenase activity|metal ion binding|oxidoreductase activity, oxidizing metal ions with flavin as acceptor|ubiquinone binding|leucine catabolic process|response to absence of light
Csa4G053270	142.53	0.21695	-4.66958	0.495492	-1.01307	3.02e-06	4.51e-05	Down	17.6033	13.2687	13.422	9.51711	6.89968	7.12563	T19F6.18	cellulose synthase-like protein G3 [Cucumis sativus]	GO:0005794,GO:0000139,GO:0016021,GO:0005886,GO:0005802,GO:0016760,GO:0016759,GO:0071555,GO:0030244,GO:0009833	Golgi apparatus|Golgi membrane|integral component of membrane|plasma membrane|trans-Golgi network|cellulose synthase (UDP-forming) activity|cellulose synthase activity|cell wall organization|cellulose biosynthetic process|plant-type primary cell wall biogenesis
Csa3G009520	309.394	0.157243	-6.4403	0.49562	-1.01269	1.19e-10	4.97e-09	Down	23.0489	22.417	19.1174	12.3696	11.8179	9.99105		uncharacterized protein LOC101206077 [Cucumis sativus]
Csa2G174130	89.7246	0.267059	-3.77414	0.497263	-1.00792	0.00016056	0.00140656	Down	4.75576	4.0706	2.91877	1.72177	1.99816	2.54791		hypothetical protein Csa_006622 [Cucumis sativus]	GO:0046872,GO:0045735	metal ion binding|nutrient reservoir activity
Csa4G303040	780.31	0.170481	-5.89787	0.498107	-1.00547	3.68e-09	1.15e-07	Down	29.2127	23.3382	25.8991	18.3726	13.1092	10.3886	T8P21.19	protein NRT1/ PTR FAMILY 5.6 [Cucumis sativus]	GO:0016021,GO:0035673,GO:1904680,GO:0015333	integral component of membrane|oligopeptide transmembrane transporter activity|peptide transmembrane transporter activity|peptide:proton symporter activity
Csa6G505950	5489.74	0.107105	-9.38628	0.498161	-1.00532	6.22e-21	9.38e-19	Down	353.08	372.784	348.38	195.894	209.953	164.048	T19K4.170	chaperone protein dnaJ 11, chloroplastic [Cucumis sativus]	GO:0009507,GO:0009570,GO:0005634,GO:0009536	chloroplast|chloroplast stroma|nucleus|plastid
Csa7G448060	55.9065	0.297184	-3.38176	0.498269	-1.005	0.000720235	0.0049954	Down	3.58768	2.67374	2.99287	1.87636	1.4545	1.60921	T18A20	FCS-Like Zinc finger 17 [Cucumis sativus]	GO:0005737,GO:0005829,GO:0005634,GO:0046872,GO:0009737,GO:0034097,GO:0009749,GO:1905582,GO:1902074,GO:0042594,GO:0009744	cytoplasm|cytosol|nucleus|metal ion binding|response to abscisic acid|response to cytokine|response to glucose|response to mannose|response to salt|response to starvation|response to sucrose
Csa6G185320	62.6496	0.294042	-3.41546	0.498516	-1.00429	0.000636744	0.00451348	Down	0.875316	0.755203	1.1035	0.603971	0.347822	0.504124	F23F1.14	ABC transporter G family member 31 [Cucumis sativus]	GO:0016021,GO:0005886,GO:0009506,GO:0005524,GO:0042626,GO:0006855,GO:0055085	integral component of membrane|plasma membrane|plasmodesma|ATP binding|ATPase activity, coupled to transmembrane movement of substances|drug transmembrane transport|transmembrane transport
Csa6G057130	166.476	0.232866	-4.31145	0.498619	-1.00399	1.62e-05	0.000195149	Down	16.1568	11.0748	12.3649	9.7008	5.48167	6.04958	T22I11.3	LOW QUALITY PROTEIN: vacuolar iron transporter homolog 4 [Cucumis sativus]	GO:0016021,GO:0016020,GO:0005774,GO:0005381,GO:0005384,GO:0030026,GO:0071369,GO:0071281,GO:0071732,GO:0006880,GO:0010039	integral component of membrane|membrane|vacuolar membrane|iron ion transmembrane transporter activity|manganese ion transmembrane transporter activity|cellular manganese ion homeostasis|cellular response to ethylene stimulus|cellular response to iron ion|cellular response to nitric oxide|intracellular sequestering of iron ion|response to iron ion
Csa5G638340	439.279	0.129924	-7.71751	0.499069	-1.00269	1.19e-14	8.91e-13	Down	23.8742	22.8286	23.4462	12.469	13.0434	11.8233		uncharacterized protein LOC101213437 [Cucumis sativus]
Csa2G008780	638.396	0.136565	-7.33771	0.499282	-1.00207	2.17e-13	1.41e-11	Down	67.6272	67.4616	65.7145	43.4488	33.2973	30.3057		uncharacterized protein LOC105434545 [Cucumis sativus]
Csa1G008470	1451.1	0.108944	-9.18889	0.499626	-1.00108	3.97e-20	5.39e-18	Down	51.2767	50.9369	44.6094	27.0537	26.4608	24.8131	T8E3.15	protein NUCLEAR FUSION DEFECTIVE 4 [Cucumis sativus]	GO:0016021,GO:0005739,GO:0000741,GO:0010197,GO:0009651	integral component of membrane|mitochondrion|karyogamy|polar nucleus fusion|response to salt stress
Csa3G890120	235.141	0.175859	-5.6906	0.499743	-1.00074	1.27e-08	3.46e-07	Down	14.0221	18.435	16.3612	10.83	7.66888	7.45672	K2I5.6	PREDICTED: AT-hook motif nuclear-localized protein 17-like [Cucumis melo]	GO:0005634,GO:0003680,GO:0003700	nucleus|AT DNA binding|DNA-binding transcription factor activity
Csa7G450760	55.4231	0.299696	3.33753	2.00034	1.00025	0.000845261	0.00570439	Up	0.988902	1.56711	1.35869	2.3828	2.64386	3.29237	dl3190w	protein gar2 [Cucumis sativus]	GO:0005829,GO:0005634,GO:1990904,GO:0005681,GO:0003729,GO:0003723,GO:0006397,GO:0051028,GO:1901000,GO:2000070,GO:0008380,GO:0010228	cytosol|nucleus|ribonucleoprotein complex|spliceosomal complex|mRNA binding|RNA binding|mRNA processing|mRNA transport|regulation of response to salt stress|regulation of response to water deprivation|RNA splicing|vegetative to reproductive phase transition of meristem
Csa6G003410	1130.81	0.16916	5.9184	2.0016	1.00116	3.25e-09	1.04e-07	Up	13.4292	21.3421	22.9012	32.6553	38.2358	51.2625	T20K12.210	AT-hook motif nuclear-localized protein 9 [Cucumis sativus]	GO:0005634,GO:0003677	nucleus|DNA binding
Csa6G526260	201.7	0.188753	5.30513	2.00188	1.00136	1.13e-07	2.47e-06	Up	1.63642	2.1066	2.36313	3.68635	4.07093	5.22784	T5M7.14	protein CHUP1, chloroplastic [Cucumis sativus]	GO:0009507,GO:0009707,GO:0009902	chloroplast|chloroplast outer membrane|chloroplast relocation
Csa4G430890	871.941	0.137408	7.30114	2.00449	1.00324	2.85e-13	1.81e-11	Up	11.2789	13.3246	12.3466	21.1666	26.7548	30.8519	F14P13.13	hypothetical protein Csa_012120 [Cucumis sativus]	GO:0009507,GO:0005694,GO:0005524,GO:0003677,GO:0003918,GO:0046872,GO:0006265	chloroplast|chromosome|ATP binding|DNA binding|DNA topoisomerase type II (ATP-hydrolyzing) activity|metal ion binding|DNA topological change
Csa2G433930	105.993	0.226107	4.45479	2.01009	1.00726	8.4e-06	0.000110254	Up	0.573283	0.928666	0.659928	1.52785	1.54319	1.54666	PDR1	hypothetical protein Csa_022007 [Cucumis sativus]
Csa3G823060	2273.93	0.0964962	10.4487	2.01148	1.00826	1.49e-25	2.97e-23	Up	61.6785	75.4503	76.7096	164.847	144.334	148.333	F13H10.4	probable calcium-binding protein CML35 [Cucumis sativus]	GO:0005886,GO:0005509	plasma membrane|calcium ion binding	csv04626	Plant-pathogen interaction
Csa2G171920	200.642	0.210599	4.78838	2.01172	1.00843	1.68e-06	2.7e-05	Up	3.52272	6.64166	5.35318	9.0619	10.5991	13.3978		MATH and LRR domain-containing protein PFE0570w [Cucumis sativus]
Csa6G109720	65.6303	0.277773	3.63096	2.01193	1.00858	0.000282374	0.00227081	Up	0.596121	0.619567	0.887836	1.31756	1.50347	1.67455		uncharacterized protein LOC101214238 [Cucumis sativus]
Csa5G611700	393.553	0.134587	7.50831	2.01464	1.01052	5.99e-14	4.16e-12	Up	8.17944	8.68798	7.74925	17.2067	18.6214	17.021	F10A8.17	probable ribose-5-phosphate isomerase 2 [Cucumis sativus]	GO:0005737,GO:0004751,GO:0008219,GO:0009052,GO:0010228	cytoplasm|ribose-5-phosphate isomerase activity|cell death|pentose-phosphate shunt, non-oxidative branch|vegetative to reproductive phase transition of meristem	csv00030,csv00710	Pentose phosphate pathway|Carbon fixation in photosynthetic organisms
Csa3G722890	39.735	0.366209	2.76006	2.01497	1.01076	0.00577907	0.02731	Up	0.494379	0.536221	0.925244	1.036	1.5209	1.61567	F28A21.160	pentatricopeptide repeat-containing protein DOT4, chloroplastic [Cucumis sativus]
Csa3G124790	121.124	0.225836	4.47906	2.01605	1.01153	7.5e-06	0.000100442	Up	2.49501	3.50386	3.10513	7.30361	4.80695	7.45316		uncharacterized protein LOC101208043 [Cucumis sativus]
Csa6G357020	126.54	0.238619	4.23964	2.01623	1.01166	2.24e-05	0.000256371	Up	3.13517	4.05744	5.14431	6.4598	9.29337	10.603		uncharacterized protein LOC101215930 [Cucumis sativus]
Csa6G358130	173.465	0.203971	4.96182	2.0168	1.01207	6.98e-07	1.23e-05	Up	4.26469	6.33301	7.15876	10.6098	14.121	13.1583		uncharacterized protein LOC101207424 [Cucumis sativus]
Csa5G332530	33.5563	0.387472	2.61507	2.01847	1.01326	0.00892103	0.0388007	Up	1.11406	1.46467	2.39389	4.32753	3.1988	3.10368	T17B22.9	expansin-A13 [Cucumis sativus]
Csa1G074980	91.7883	0.265418	3.82202	2.02011	1.01443	0.000132364	0.00118585	Up	1.91908	3.36405	4.48953	7.73798	6.12251	7.02572	SBP1	squamosa promoter-binding-like protein 3 [Cucumis sativus]	GO:0005634,GO:0003677,GO:0003700,GO:0046872,GO:0009908	nucleus|DNA binding|DNA-binding transcription factor activity|metal ion binding|flower development
Csa5G590070	251.539	0.19708	5.14934	2.02067	1.01483	2.61e-07	5.21e-06	Up	2.36922	2.69325	2.44768	3.97991	5.07575	7.11464		urease isoform X1 [Cucumis sativus]			csv00220,csv00230	Arginine biosynthesis|Purine metabolism
Csa3G002650	225.338	0.182766	5.5603	2.02264	1.01624	2.69e-08	6.81e-07	Up	3.69534	5.8572	5.92487	10.3086	10.1996	12.6928	T19K4.60	F-box protein At4g35930 [Cucumis sativus]
Csa1G041530	450.66	0.160728	6.32898	2.02404	1.01724	2.47e-10	9.79e-09	Up	15.4076	20.8498	21.3822	33.3454	41.0534	49.3898	T22D6.120	H/ACA ribonucleoprotein complex subunit 2-like protein [Cucumis sativus]	GO:0031429,GO:0005730,GO:0005732,GO:0034513,GO:0003723,GO:0000469,GO:0000470,GO:0031118,GO:0031120,GO:0006412	box H/ACA snoRNP complex|nucleolus|small nucleolar ribonucleoprotein complex|box H/ACA snoRNA binding|RNA binding|cleavage involved in rRNA processing|maturation of LSU-rRNA|rRNA pseudouridine synthesis|snRNA pseudouridine synthesis|translation	csv03008	Ribosome biogenesis in eukaryotes
Csa5G218200	229.894	0.177606	5.73723	2.02647	1.01897	9.62e-09	2.69e-07	Up	2.00875	2.1803	2.89811	4.457	5.06193	5.73971	F18O21.60	probable leucine-rich repeat receptor-like protein kinase IMK3 [Cucumis sativus]	GO:0016021,GO:0005886,GO:0005524,GO:0004674	integral component of membrane|plasma membrane|ATP binding|protein serine/threonine kinase activity
Csa2G431070	353.206	0.213132	4.78605	2.028	1.02006	1.7e-06	2.73e-05	Up	5.30276	6.08673	7.63404	20.1536	10.4852	10.4897	BEBT1	benzyl alcohol O-benzoyltransferase [Cucumis sativus]
Csa1G673530	37.3155	0.350322	2.91844	2.03128	1.02239	0.0035179	0.0185055	Up	1.17641	1.39197	1.77357	2.826	3.31749	3.21434	T6K12.4	probable inactive ATP-dependent zinc metalloprotease FTSHI 5, chloroplastic [Cucumis sativus]	GO:0009507,GO:0009941,GO:0031969,GO:0016021,GO:0005739,GO:0009506,GO:0005524,GO:0004176,GO:0004222,GO:0006508	chloroplast|chloroplast envelope|chloroplast membrane|integral component of membrane|mitochondrion|plasmodesma|ATP binding|ATP-dependent peptidase activity|metalloendopeptidase activity|proteolysis
Csa3G046230	926.638	0.14428	7.08652	2.03135	1.02244	1.38e-12	7.92e-11	Up	45.9626	67.7847	68.9942	112.376	128.748	152.225	GSCOC_T00019870001	caffeic acid 3-O-methyltransferase [Cucumis sativus]	GO:0047763,GO:0046983,GO:0009809	caffeate O-methyltransferase activity|protein dimerization activity|lignin biosynthetic process	csv00380,csv00940	Tryptophan metabolism|Phenylpropanoid biosynthesis
Csa6G088160	1574.09	0.326869	3.1317	2.03307	1.02366	0.00173794	0.0103444	Up	27.1357	34.562	36.8724	43.7607	86.3048	81.8674	CYP81Q32	isoflavone 2'-hydroxylase-like [Cucumis sativus]			csv00996	Biosynthesis of various alkaloids
Csa4G333620	399.112	0.185085	5.53136	2.03323	1.02377	3.18e-08	7.88e-07	Up	10.1353	15.4001	18.312	25.9297	29.7034	38.7518		non-specific lipid-transfer protein 1 [Cucumis sativus]	GO:0008289,GO:0006869	lipid binding|lipid transport
Csa5G155500	560.897	0.122473	8.36014	2.03339	1.02389	6.26e-17	6.51e-15	Up	12.513	12.9963	11.3102	26.128	27.3057	26.4222	T9I4.13	RHOMBOID-like protein 2 [Cucumis sativus]	GO:0005794,GO:0000139,GO:0016021,GO:0004252	Golgi apparatus|Golgi membrane|integral component of membrane|serine-type endopeptidase activity
Csa3G889920	218.253	0.234274	4.38083	2.03682	1.02632	1.18e-05	0.000149131	Up	8.92955	17.9318	20.3804	27.4954	30.8209	43.2896		hypothetical protein Csa_001434 [Cucumis sativus]
Csa2G368870	83.4776	0.254623	4.03392	2.03797	1.02713	5.49e-05	0.000558258	Up	0.666311	1.21293	0.941482	1.86872	2.06735	2.16017	T20H2.17	kinesin-like protein KIN-6 isoform X1 [Cucumis sativus]	GO:0005871,GO:0005874,GO:0005524,GO:0016887,GO:0008017,GO:0003777,GO:0007018	kinesin complex|microtubule|ATP binding|ATPase activity|microtubule binding|microtubule motor activity|microtubule-based movement
Csa2G013290	53.2305	0.323945	3.17145	2.03831	1.02737	0.00151682	0.0092632	Up	1.6976	2.23186	2.68028	3.47067	6.12514	4.64853	ACP1	acyl carrier protein 1, chloroplastic [Cucumis sativus]	GO:0009507,GO:0031177,GO:0006633	chloroplast|phosphopantetheine binding|fatty acid biosynthetic process
Csa3G199660	1048.89	0.164256	6.25701	2.03885	1.02775	3.92e-10	1.5e-08	Up	13.9946	22.2539	23.317	34.0053	43.0529	51.3773	F3A4.150	cyclin-D3-3 [Cucumis sativus]	GO:0000307,GO:0005737,GO:0005634,GO:0016538,GO:0019901,GO:0051301,GO:0010444,GO:0000278,GO:0045787,GO:0008284,GO:0006468,GO:0000079,GO:0007088,GO:0048316	cyclin-dependent protein kinase holoenzyme complex|cytoplasm|nucleus|cyclin-dependent protein serine/threonine kinase regulator activity|protein kinase binding|cell division|guard mother cell differentiation|mitotic cell cycle|positive regulation of cell cycle|positive regulation of cell proliferation|protein phosphorylation|regulation of cyclin-dependent protein serine/threonine kinase activity|…	csv04075	Plant hormone signal transduction
Csa6G006810	74.7835	0.273916	3.75781	2.04107	1.02932	0.000171407	0.00148321	Up	0.598888	1.27947	1.07932	2.16311	2.16995	2.05348		E3 ubiquitin-protein ligase TRAIP isoform X1 [Cucumis sativus]
Csa4G011820	57.3938	0.299682	3.44518	2.04551	1.03246	0.000570686	0.00410803	Up	1.3334	0.857462	1.05486	2.3705	2.61581	2.11206	F12F1.7	BAG family molecular chaperone regulator 6 [Cucumis sativus]	GO:0005739,GO:0009506,GO:0005516,GO:0051087,GO:0006457	mitochondrion|plasmodesma|calmodulin binding|chaperone binding|protein folding
Csa1G571850	384.261	0.176163	5.88135	2.05064	1.03608	4.07e-09	1.25e-07	Up	6.6384	10.7111	9.52281	16.1847	18.0925	24.154	MKD15.17	superoxide dismutase [Cucumis melo]	GO:0009507,GO:0042644,GO:0009534,GO:0009295,GO:0042646,GO:0009579,GO:0046872,GO:0004784,GO:0055114	chloroplast|chloroplast nucleoid|chloroplast thylakoid|nucleoid|plastid nucleoid|thylakoid|metal ion binding|superoxide dismutase activity|oxidation-reduction process	csv04146	Peroxisome
Csa5G429970	324.741	0.184587	5.61809	2.05199	1.03702	1.93e-08	5.06e-07	Up	2.8498	4.65167	4.82495	7.42064	8.58937	10.77	F1E22.8	uncharacterized protein At1g65710 [Cucumis sativus]
Csa2G361570	195.232	0.184005	5.63907	2.05284	1.03762	1.71e-08	4.54e-07	Up	6.7544	7.21506	7.54952	14.6146	13.2756	19.2394		deoxyuridine 5'-triphosphate nucleotidohydrolase [Cucumis sativus]	GO:0004170,GO:0000287,GO:0006226,GO:0046081	dUTP diphosphatase activity|magnesium ion binding|dUMP biosynthetic process|dUTP catabolic process	csv00240	Pyrimidine metabolism
Csa5G177700	97.9471	0.24448	4.24422	2.05285	1.03763	2.19e-05	0.000252902	Up	1.74289	2.42967	1.59344	3.6247	4.89959	4.05702	T32M21.130	3-ketoacyl-CoA synthase 19 [Cucumis sativus]	GO:0016021,GO:0102336,GO:0102337,GO:0102338,GO:0102756,GO:0006633,GO:0009409,GO:0009416	integral component of membrane|3-oxo-arachidoyl-CoA synthase activity|3-oxo-cerotoyl-CoA synthase activity|3-oxo-lignoceronyl-CoA synthase activity|very-long-chain 3-ketoacyl-CoA synthase activity|fatty acid biosynthetic process|response to cold|response to light stimulus	csv00062,csv04626	Fatty acid elongation|Plant-pathogen interaction
Csa4G082440	111.563	0.253945	4.08608	2.05286	1.03764	4.39e-05	0.000459795	Up	2.84065	5.19347	4.98409	8.65088	7.40383	12.3019		pathogen-related protein [Cucumis sativus]	GO:0006952,GO:0009607	defense response|response to biotic stimulus
Csa2G169720	1359.41	0.139384	7.47217	2.05837	1.0415	7.89e-14	5.38e-12	Up	17.0953	18.6682	17.2763	29.8061	41.3895	44.9812	CPN60-2	chaperonin CPN60-2, mitochondrial [Cucumis sativus]	GO:0005739,GO:0005524,GO:0042026	mitochondrion|ATP binding|protein refolding	csv03018	RNA degradation
Csa2G023890	74.5939	0.280132	3.71796	2.05839	1.04152	0.000200837	0.00169517	Up	3.91804	4.84969	3.38033	9.03284	10.9421	6.60993	POTLX-3	linoleate 9S-lipoxygenase 6-like [Cucumis sativus]	GO:0005737,GO:0046872,GO:0016702,GO:0031408	cytoplasm|metal ion binding|oxidoreductase activity, acting on single donors with incorporation of molecular oxygen, incorporation of two atoms of oxygen|oxylipin biosynthetic process	csv00591	Linoleic acid metabolism
Csa3G822510	80.4566	0.259894	4.00975	2.05923	1.04211	6.08e-05	0.000610751	Up	2.19774	2.683	3.3732	5.18855	5.58059	7.28894	F21E1.80	UDP-URONIC ACID TRANSPORTER 1 [Cucumis sativus]	GO:0005794,GO:0000139,GO:0016021,GO:0008643,GO:0048359,GO:0015780	Golgi apparatus|Golgi membrane|integral component of membrane|carbohydrate transport|mucilage metabolic process involved in seed coat development|nucleotide-sugar transmembrane transport
Csa2G006270	106.882	0.243618	4.28098	2.0604	1.04292	1.86e-05	0.000220403	Up	2.65475	4.4556	4.75701	7.44839	7.99326	10.4704	F9L1.31	ethylene-responsive transcription factor WIN1 [Cucumis sativus]	GO:0005634,GO:0003700,GO:0043565,GO:0010143,GO:0009873,GO:0009414,GO:0010166	nucleus|DNA-binding transcription factor activity|sequence-specific DNA binding|cutin biosynthetic process|ethylene-activated signaling pathway|response to water deprivation|wax metabolic process
Csa5G608380	465.36	0.16212	6.44295	2.06269	1.04453	1.17e-10	4.9e-09	Up	11.6782	12.2799	15.2338	24.9768	35.0428	25.7191	F14K14.5	AP2/ERF and B3 domain-containing transcription repressor RAV2 [Cucumis sativus]	GO:0005634,GO:0003700,GO:0043565,GO:0009873,GO:0045892	nucleus|DNA-binding transcription factor activity|sequence-specific DNA binding|ethylene-activated signaling pathway|negative regulation of transcription, DNA-templated
Csa4G192200	293.04	0.194011	5.39517	2.06583	1.04672	6.85e-08	1.58e-06	Up	4.81561	8.50107	9.04485	14.887	14.297	19.7243	F22O13.4	syntaxin-related protein KNOLLE [Cucumis sativus]	GO:0009504,GO:0012505,GO:0016021,GO:0009524,GO:0005886,GO:0009506,GO:0031201,GO:0005484,GO:0000149,GO:0007049,GO:0051301,GO:0006887,GO:0006886,GO:0048278,GO:0006906	cell plate|endomembrane system|integral component of membrane|phragmoplast|plasma membrane|plasmodesma|SNARE complex|SNAP receptor activity|SNARE binding|cell cycle|cell division|exocytosis|intracellular protein transport|vesicle docking|vesicle fusion	csv04130	SNARE interactions in vesicular transport
Csa4G286950	271.608	0.208805	5.02292	2.06882	1.04881	5.09e-07	9.37e-06	Up	29.6753	48.4317	58.2512	76.3603	114.903	106.356	T14D3.80	linoleate 13S-lipoxygenase 2-1, chloroplastic [Cucumis sativus]	GO:0009507,GO:0009941,GO:0009570,GO:0009535,GO:0005737,GO:0016165,GO:0046872,GO:0010597,GO:0009695,GO:0034440,GO:0031408,GO:0009617,GO:0009620,GO:0080027,GO:0009753,GO:0009611	chloroplast|chloroplast envelope|chloroplast stroma|chloroplast thylakoid membrane|cytoplasm|linoleate 13S-lipoxygenase activity|metal ion binding|green leaf volatile biosynthetic process|jasmonic acid biosynthetic process|lipid oxidation|oxylipin biosynthetic process|response to bacterium|response to fungus|response to herbivore|response to jasmonic acid|response to wounding	csv00591,csv00592	Linoleic acid metabolism|alpha-Linolenic acid metabolism
Csa2G295950	207.772	0.18836	5.57866	2.07167	1.0508	2.42e-08	6.17e-07	Up	4.98251	6.28853	4.84895	9.69756	11.6903	14.1798		uncharacterized protein LOC101208580 [Cucumis sativus]			csv03010	Ribosome
Csa4G198330	158.703	0.210402	5.0056	2.07511	1.05319	5.57e-07	1.01e-05	Up	3.80342	5.75387	6.60898	10.5454	10.8994	14.1243	CDC2C	PREDICTED: cell division control protein 2 homolog C [Cucumis melo]	GO:0005524,GO:0004693,GO:0008353,GO:0007049,GO:0051301	ATP binding|cyclin-dependent protein serine/threonine kinase activity|RNA polymerase II CTD heptapeptide repeat kinase activity|cell cycle|cell division
Csa5G025910	360.462	0.154702	6.81658	2.07706	1.05454	9.32e-12	4.66e-10	Up	5.30833	6.21398	6.82432	11.708	15.4724	13.2531	T23K23.18	heat stress transcription factor A-8 [Cucumis sativus]	GO:0005737,GO:0005634,GO:0003700,GO:0000978,GO:0043565,GO:0034605,GO:0061408	cytoplasm|nucleus|DNA-binding transcription factor activity|RNA polymerase II proximal promoter sequence-specific DNA binding|sequence-specific DNA binding|cellular response to heat|positive regulation of transcription from RNA polymerase II promoter in response to heat stress
Csa1G073750	73.4467	0.271627	3.88462	2.07796	1.05517	0.000102491	0.000950927	Up	0.87397	1.41774	1.75877	2.96838	3.0356	2.90001	OsJ_07673	sphingolipid delta(4)-desaturase DES1-like [Cucumis sativus]	GO:0005789,GO:0016021,GO:0042284,GO:0046513,GO:0006633	endoplasmic reticulum membrane|integral component of membrane|sphingolipid delta-4 desaturase activity|ceramide biosynthetic process|fatty acid biosynthetic process	csv00600	Sphingolipid metabolism
Csa7G115340	128.826	0.237457	4.4439	2.07806	1.05524	8.83e-06	0.000115267	Up	0.583257	0.659685	0.909651	1.30643	1.36333	2.08627		uncharacterized protein LOC101214907 isoform X2 [Cucumis sativus]
Csa2G075420	58.4025	0.349003	3.02783	2.0802	1.05672	0.00246315	0.0138378	Up	0.605893	1.22473	1.63792	2.16776	1.86396	3.60316		eisosome protein SEG2 [Cucumis sativus]
Csa5G590170	163.429	0.199784	5.29785	2.08266	1.05843	1.17e-07	2.56e-06	Up	6.27624	10.0087	8.3786	18.772	15.0969	20.7562	MPE11.15	hypothetical protein Csa_009142 [Cucumis sativus]
Csa1G470250	106.614	0.237953	4.45136	2.0838	1.05922	8.53e-06	0.000111719	Up	2.97642	5.2175	5.57045	9.19534	10.1062	11.0561		hypothetical protein Csa_019764 [Cucumis sativus]
Csa3G734980	140.147	0.220315	4.81032	2.08462	1.05979	1.51e-06	2.45e-05	Up	2.34862	3.14951	3.02802	4.70562	6.67936	7.48256	MYF24.13	protein SLOW GREEN 1, chloroplastic [Cucumis sativus]	GO:0009507,GO:0009941,GO:0009536,GO:0009658	chloroplast|chloroplast envelope|plastid|chloroplast organization
Csa4G007100	137.994	0.221546	4.78651	2.08556	1.06043	1.7e-06	2.72e-05	Up	1.75647	2.90215	1.70287	4.22187	4.96544	4.90862	F13K9.22	indole-3-acetic acid-amido synthetase GH3.17 [Cucumis sativus]	GO:0005737,GO:0005634,GO:0010279,GO:0010252,GO:0009733	cytoplasm|nucleus|indole-3-acetic acid amido synthetase activity|auxin homeostasis|response to auxin	csv04075	Plant hormone signal transduction
Csa5G523000	34.4623	0.379318	2.79577	2.08563	1.06048	0.00517768	0.0250848	Up	0.888643	0.796573	1.00795	1.40388	2.36102	2.20734	F14G11.2	SUPPRESSOR OF GAMMA RESPONSE 1 [Cucumis sativus]	GO:0005634,GO:0003700,GO:0043565,GO:0044212,GO:0000077,GO:0040020,GO:0010332	nucleus|DNA-binding transcription factor activity|sequence-specific DNA binding|transcription regulatory region DNA binding|DNA damage checkpoint|regulation of meiotic nuclear division|response to gamma radiation
Csa6G526330	151.373	0.22967	4.62049	2.08665	1.06119	3.83e-06	5.57e-05	Up	3.52407	4.40147	5.91143	9.65444	7.75764	13.2917	MFC16.25	vacuolar protein sorting-associated protein 2 homolog 2 [Cucumis sativus]	GO:0000815,GO:0005771,GO:0032509,GO:0045324,GO:0015031,GO:0000920	ESCRT III complex|multivesicular body|endosome transport via multivesicular body sorting pathway|late endosome to vacuole transport|protein transport|septum digestion after cytokinesis	csv04144	Endocytosis
Csa1G275930	164.472	0.186987	5.67951	2.08781	1.06199	1.35e-08	3.65e-07	Up	2.15103	3.0165	2.46015	5.888	4.9753	6.095	F6I18.230	histone-lysine N-methyltransferase ASHR3 isoform X1 [Cucumis sativus]	GO:0000785,GO:0005634,GO:0046872,GO:0008168,GO:0016571,GO:0007275	chromatin|nucleus|metal ion binding|methyltransferase activity|histone methylation|multicellular organism development
Csa7G262890	55.9857	0.311723	3.40718	2.08796	1.0621	0.000656372	0.00462502	Up	1.06305	1.62651	1.29586	2.73542	3.75902	2.3174		proteoglycan 4 isoform X2 [Cucumis sativus]
Csa6G425140	210.587	0.175761	6.04615	2.08881	1.06268	1.48e-09	5.15e-08	Up	2.06101	2.69133	2.83791	4.99185	5.46462	6.38641	NPK1	mitogen-activated protein kinase kinase kinase NPK1 [Cucumis sativus]	GO:0005856,GO:0005634,GO:0009524,GO:0005524,GO:0004709,GO:0000919,GO:0006952	cytoskeleton|nucleus|phragmoplast|ATP binding|MAP kinase kinase kinase activity|cell plate assembly|defense response
Csa7G004140	244.057	0.17054	6.23885	2.09068	1.06397	4.41e-10	1.65e-08	Up	2.08473	2.63423	2.58503	4.51471	5.84335	5.85751	F16F14.6	DNA replication licensing factor MCM4 [Cucumis sativus]	GO:0005829,GO:0042555,GO:0000347,GO:0005524,GO:0003677,GO:0003678,GO:0046872,GO:0007049,GO:0006270,GO:0006268	cytosol|MCM complex|THO complex|ATP binding|DNA binding|DNA helicase activity|metal ion binding|cell cycle|DNA replication initiation|DNA unwinding involved in DNA replication	csv03030	DNA replication
Csa6G396650	457.295	0.1525	6.97965	2.09129	1.06439	2.96e-12	1.62e-10	Up	5.36958	7.71631	8.31184	13.9315	16.1732	17.3122	T26F17.10	lysM domain-containing GPI-anchored protein 1 [Cucumis sativus]	GO:0031225,GO:0046658,GO:0005576,GO:0005886,GO:0042834,GO:0006952,GO:0006955	anchored component of membrane|anchored component of plasma membrane|extracellular region|plasma membrane|peptidoglycan binding|defense response|immune response
Csa3G816040	379.348	0.185306	5.7491	2.09267	1.06534	8.97e-09	2.53e-07	Up	5.88802	7.98678	9.06962	12.9613	16.2609	21.6977	T12J13.9	S-sulfo-L-cysteine synthase (O-acetyl-L-serine-dependent), chloroplastic [Cucumis sativus]	GO:0009507,GO:0009543,GO:0005737,GO:0031977,GO:0004124,GO:0030170,GO:0006535,GO:0015979,GO:0009643,GO:0010310,GO:0090322	chloroplast|chloroplast thylakoid lumen|cytoplasm|thylakoid lumen|cysteine synthase activity|pyridoxal phosphate binding|cysteine biosynthetic process from serine|photosynthesis|photosynthetic acclimation|regulation of hydrogen peroxide metabolic process|regulation of superoxide metabolic process	csv00270	Cysteine and methionine metabolism
Csa6G088090	45.2727	0.355726	2.99525	2.09288	1.06549	0.00274218	0.0150452	Up	0.656651	1.02234	1.36549	1.76644	1.91379	3.07364	F12K11.5	uncharacterized protein LOC101205962 isoform X1 [Cucumis sativus]	GO:0007142,GO:0009556,GO:0006355	male meiosis II|microsporogenesis|regulation of transcription, DNA-templated
Csa3G822270	47.933	0.332779	3.20249	2.09322	1.06572	0.00136243	0.00846996	Up	4.10245	4.62302	4.87482	14.0786	7.96307	8.3206		hypothetical protein Csa_002250 [Cucumis sativus]
Csa6G509580	219.314	0.210974	5.05333	2.0938	1.06612	4.34e-07	8.2e-06	Up	2.79596	4.92901	4.31655	6.81326	8.77521	11.1059		G2/mitotic-specific cyclin-2 [Cucumis sativus]	GO:0005634,GO:0007049,GO:0051301	nucleus|cell cycle|cell division
Csa6G507090	320.696	0.163109	6.54668	2.09626	1.06782	5.88e-11	2.61e-09	Up	4.18762	6.35834	5.42249	10.4785	11.4338	13.6263	F24M12.320	protein POLLENLESS 3-LIKE 2 [Cucumis sativus]	GO:0005634,GO:0007049,GO:0051301	nucleus|cell cycle|cell division
Csa1G612930	57.0552	0.331657	3.22086	2.09685	1.06822	0.00127805	0.00802675	Up	1.35413	0.628335	0.911017	2.06277	1.74256	2.7312		uncharacterized protein LOC101212781 isoform X1 [Cucumis sativus]
Csa4G006140	180.788	0.21425	4.98931	2.09792	1.06896	6.06e-07	1.09e-05	Up	2.68405	4.96231	5.46515	8.49789	10.1304	10.4254	MSJ11.25	palmitoyl-monogalactosyldiacylglycerol delta-7 desaturase, chloroplastic [Cucumis sativus]	GO:0031969,GO:0005789,GO:0016021,GO:0009579,GO:0009979,GO:0016717,GO:0031408,GO:0010205,GO:0006636	chloroplast membrane|endoplasmic reticulum membrane|integral component of membrane|thylakoid|16:0 monogalactosyldiacylglycerol desaturase activity|oxidoreductase activity, acting on paired donors, with oxidation of a pair of donors resulting in the reduction of molecular oxygen to two molecules of water|oxylipin biosynthetic process|photoinhibition|unsaturated fatty acid biosynthetic process
Csa6G483440	73.3796	0.262222	4.08349	2.10057	1.07078	4.44e-05	0.000464694	Up	1.32014	1.22035	1.34401	2.5584	3.35619	2.77014	MUB3.9	chromatin assembly factor 1 subunit FAS2 [Cucumis sativus]	GO:0033186,GO:0005634,GO:0008283,GO:0006310,GO:0000724,GO:0031507,GO:0048366,GO:0009933,GO:0006334,GO:0009555,GO:0010026	CAF-1 complex|nucleus|cell proliferation|DNA recombination|double-strand break repair via homologous recombination|heterochromatin assembly|leaf development|meristem structural organization|nucleosome assembly|pollen development|trichome differentiation
Csa3G881710	93.5996	0.267424	4.00792	2.10207	1.07181	6.13e-05	0.000614534	Up	2.59806	2.04073	3.2965	4.86147	5.05748	7.87965	T28I24.22	replication protein A 32 kDa subunit A [Cucumis sativus]	GO:0000785,GO:0000781,GO:0000794,GO:0005662,GO:0005634,GO:0035861,GO:0003684,GO:0003690,GO:0098505,GO:0043565,GO:0003697,GO:0006284,GO:0006281,GO:0006260,GO:0006265,GO:0006268,GO:0000724,GO:0016458,GO:0030491,GO:0006298,GO:0006312,GO:0006289,GO:0051096,GO:0007131,GO:2000001,GO:0000722,GO:0007004	chromatin|chromosome, telomeric region|condensed nuclear chromosome|DNA replication factor A complex|nucleus|site of double-strand break|damaged DNA binding|double-stranded DNA binding|G-rich strand telomeric DNA binding|sequence-specific DNA binding|single-stranded DNA binding|base-excision repair|DNA repair|DNA replication|DNA topological change|DNA unwinding involved in DNA replication|double-…	csv03030,csv03420,csv03430,csv03440	DNA replication|Nucleotide excision repair|Mismatch repair|Homologous recombination
Csa5G266880	434.426	0.176386	6.08393	2.10398	1.07312	1.17e-09	4.14e-08	Up	17.2622	23.6405	26.2576	38.8047	48.516	62.5116	F15H11.12	MLP-like protein 43 [Cucumis sativus]	GO:0009507,GO:0006952	chloroplast|defense response
Csa1G479630	2044.38	0.105844	10.148	2.10542	1.07411	3.38e-24	6.18e-22	Up	36.745	37.4712	40.7887	82.863	94.7263	80.0605	F9K21.220	mitogen-activated protein kinase 3-like [Cucumis sativus]	GO:0005737,GO:0005634,GO:0005524,GO:0004707,GO:0004672,GO:0009738,GO:0010120,GO:0042742,GO:0050832,GO:0010229,GO:0035556,GO:0048481,GO:0009626,GO:0009555,GO:0010183,GO:1901002,GO:0080136,GO:0006468,GO:0010468,GO:0009617,GO:0010200,GO:0009409,GO:0050826,GO:1902065,GO:0006970,GO:0006979,GO:0010224,GO:0009414,GO:0009611	cytoplasm|nucleus|ATP binding|MAP kinase activity|protein kinase activity|abscisic acid-activated signaling pathway|camalexin biosynthetic process|defense response to bacterium|defense response to fungus|inflorescence development|intracellular signal transduction|plant ovule development|plant-type hypersensitive response|pollen development|pollen tube guidance|positive regulation of response to s…	csv04016,csv04626	MAPK signaling pathway - plant|Plant-pathogen interaction
Csa1G059750	128.001	0.256587	4.18807	2.10615	1.07461	2.81e-05	0.000312477	Up	2.96425	6.10551	7.32842	14.8814	10.2	11.4344		hypothetical protein Csa_013860 [Cucumis sativus]
Csa6G382370	738.944	0.164168	6.55286	2.10785	1.07577	5.64e-11	2.53e-09	Up	3.55614	6.02198	6.23515	10.5895	10.7362	13.9518	T7O23.18	uncharacterized protein LOC101203758 [Cucumis sativus]	GO:0000307,GO:0005737,GO:0005634,GO:0016538,GO:0019901,GO:0051301,GO:0000278,GO:0045787,GO:0008284,GO:0006468,GO:0000079,GO:0007088	cyclin-dependent protein kinase holoenzyme complex|cytoplasm|nucleus|cyclin-dependent protein serine/threonine kinase regulator activity|protein kinase binding|cell division|mitotic cell cycle|positive regulation of cell cycle|positive regulation of cell proliferation|protein phosphorylation|regulation of cyclin-dependent protein serine/threonine kinase activity|regulation of mitotic nuclear divi…
Csa5G610320	133.12	0.234366	4.59381	2.10911	1.07663	4.35e-06	6.22e-05	Up	1.50679	1.85718	2.32696	3.28443	3.93106	5.53215	T2E12.8	chaperone protein dnaJ 15 [Cucumis sativus]	GO:0005856,GO:0005789,GO:0000139,GO:0008092,GO:0009958	cytoskeleton|endoplasmic reticulum membrane|Golgi membrane|cytoskeletal protein binding|positive gravitropism
Csa3G141820	26.2672	0.410064	2.62799	2.11059	1.07765	0.00858904	0.0376191	Up	0.22731	0.224135	0.222441	0.451058	0.548467	0.515783	K9D7.2	DNA repair protein RAD5B [Cucumis sativus]	GO:0009941,GO:0005634,GO:0005524,GO:0004386,GO:0003676,GO:0008270,GO:0006325,GO:0006281	chloroplast envelope|nucleus|ATP binding|helicase activity|nucleic acid binding|zinc ion binding|chromatin organization|DNA repair
Csa6G062330	41.1288	0.340343	3.16996	2.11239	1.07887	0.00152461	0.00930778	Up	2.8899	2.19195	3.69814	6.81724	6.61085	6.31218		hypothetical protein Csa_005312 [Cucumis sativus]
Csa3G878930	194.572	0.200939	5.37273	2.11344	1.07959	7.76e-08	1.76e-06	Up	2.13549	3.27293	3.30639	5.40993	6.11734	8.00865	F18G18.15	cyclin-A2-2 [Cucumis sativus]	GO:0000307,GO:0005737,GO:0005634,GO:0016538,GO:0019901,GO:0051301,GO:0000278,GO:0045787,GO:0008284,GO:0006468,GO:0000079,GO:0007088	cyclin-dependent protein kinase holoenzyme complex|cytoplasm|nucleus|cyclin-dependent protein serine/threonine kinase regulator activity|protein kinase binding|cell division|mitotic cell cycle|positive regulation of cell cycle|positive regulation of cell proliferation|protein phosphorylation|regulation of cyclin-dependent protein serine/threonine kinase activity|regulation of mitotic nuclear divi…
Csa6G188070	140.019	0.20465	5.29296	2.11874	1.08321	1.2e-07	2.63e-06	Up	4.06781	4.36639	5.40728	9.36916	11.8277	9.93116	PCNA	proliferating cell nuclear antigen [Cucumis sativus]	GO:0005634,GO:0003677,GO:0030337,GO:0006260,GO:0006275	nucleus|DNA binding|DNA polymerase processivity factor activity|DNA replication|regulation of DNA replication	csv03030,csv03410,csv03420,csv03430	DNA replication|Base excision repair|Nucleotide excision repair|Mismatch repair
Csa2G408420	106.091	0.225226	4.81656	2.1211	1.08481	1.46e-06	2.38e-05	Up	7.42943	9.4187	7.11159	15.9124	17.8977	20.3439	F23N11	hypothetical protein Csa_022217 [Cucumis sativus]	GO:0009507,GO:0005739,GO:0000741,GO:0010197	chloroplast|mitochondrion|karyogamy|polar nucleus fusion
Csa1G039840	65.3503	0.267924	4.06374	2.12693	1.08877	4.83e-05	0.00049924	Up	0.827617	0.966383	0.928439	1.87013	2.12173	2.17032	SPCC553.09c	hypothetical protein Csa_013070, partial [Cucumis sativus]	GO:0005658,GO:0005829,GO:0000790,GO:0005634,GO:0003677,GO:0003887,GO:0046982,GO:0006270,GO:1902975,GO:1902981	alpha DNA polymerase:primase complex|cytosol|nuclear chromatin|nucleus|DNA binding|DNA-directed DNA polymerase activity|protein heterodimerization activity|DNA replication initiation|mitotic DNA replication initiation|synthesis of RNA primer involved in mitotic DNA replication	csv03030	DNA replication
Csa2G173060	317.097	0.18466	5.89626	2.12698	1.08881	3.72e-09	1.16e-07	Up	2.47057	4.15275	3.48246	6.38999	6.95432	9.45185	dl3205w	kinesin-like protein KIN-10A [Cucumis sativus]	GO:0005737,GO:0005871,GO:0005874,GO:0009524,GO:0005524,GO:0008574,GO:0016887,GO:0008017,GO:0003777,GO:0007018,GO:0047496	cytoplasm|kinesin complex|microtubule|phragmoplast|ATP binding|ATP-dependent microtubule motor activity, plus-end-directed|ATPase activity|microtubule binding|microtubule motor activity|microtubule-based movement|vesicle transport along microtubule
Csa3G821540	89.516	0.254542	4.27974	2.12782	1.08938	1.87e-05	0.000221492	Up	0.471952	0.942966	0.723147	1.47272	1.63021	1.71672	F14P13.23/F14P13.22	kinesin-like protein KIN-7O isoform X1 [Cucumis sativus]	GO:0005871,GO:0005874,GO:0005524,GO:0016887,GO:0008017,GO:0003777,GO:0007018	kinesin complex|microtubule|ATP binding|ATPase activity|microtubule binding|microtubule motor activity|microtubule-based movement
Csa6G009390	28.4104	0.425284	2.56289	2.12867	1.08995	0.0103806	0.0437577	Up	0.499192	0.738328	0.704396	1.16637	1.09693	2.13954	F11B9.23	UDP-glycosyltransferase 76B1 [Cucumis sativus]	GO:0043231,GO:0046527,GO:0080043,GO:0080044,GO:0052640,GO:0008194,GO:0006952,GO:0010150,GO:0002239	intracellular membrane-bounded organelle|glucosyltransferase activity|quercetin 3-O-glucosyltransferase activity|quercetin 7-O-glucosyltransferase activity|salicylic acid glucosyltransferase (glucoside-forming) activity|UDP-glycosyltransferase activity|defense response|leaf senescence|response to oomycetes
Csa5G410750	28.3427	0.409833	2.66087	2.12949	1.09051	0.00779394	0.0348341	Up	0.924732	1.56311	1.09883	2.22818	3.25124	2.61869	SPCC188.03	condensin complex subunit 3 [Cucumis sativus]	GO:0000793,GO:0005737,GO:0005829,GO:0000799,GO:0005634,GO:0051301,GO:0007076	condensed chromosome|cytoplasm|cytosol|nuclear condensin complex|nucleus|cell division|mitotic chromosome condensation
Csa3G002930	87.7778	0.294287	3.71789	2.13484	1.09412	0.000200895	0.00169517	Up	1.37258	2.79413	3.31461	4.43557	4.99446	7.44852		uncharacterized protein LOC101213205 [Cucumis sativus]
Csa5G168990	166.71	0.269132	4.06911	2.13632	1.09513	4.72e-05	0.000490537	Up	3.26481	5.21205	8.13613	8.68778	12.2226	16.5473		probable serine/threonine-protein kinase kinX isoform X2 [Cucumis sativus]
Csa3G171870	430.869	0.15844	6.9137	2.13673	1.09541	4.72e-12	2.47e-10	Up	19.493	31.5634	27.8183	51.8669	61.3398	65.3225	F15H11.12	MLP-like protein 43 [Cucumis sativus]	GO:0009507,GO:0006952	chloroplast|defense response
Csa6G147530	7646.78	0.141898	7.74965	2.14305	1.09966	9.21e-15	7.04e-13	Up	82.2927	99.1063	114.217	172.407	226.628	273.151		ruBisCO large subunit-binding protein subunit alpha [Cucumis sativus]	GO:0009507,GO:0005524,GO:0042026	chloroplast|ATP binding|protein refolding
Csa4G126440	31.8377	0.387019	2.84407	2.1446	1.10071	0.00445418	0.0222545	Up	5.00926	4.93929	3.17028	10.2412	8.26357	11.6684		hypothetical protein Csa_015148 [Cucumis sativus]
Csa4G008780	39.408	0.344197	3.2007	2.14603	1.10167	0.00137095	0.00850902	Up	0.697479	0.540365	0.621596	1.65514	1.27721	1.33456	PAL	phenylalanine ammonia-lyase-like [Cucumis sativus]	GO:0005737,GO:0045548,GO:0009800,GO:0006559	cytoplasm|phenylalanine ammonia-lyase activity|cinnamic acid biosynthetic process|L-phenylalanine catabolic process	csv00360,csv00940	Phenylalanine metabolism|Phenylpropanoid biosynthesis
Csa6G517400	1093.64	0.12966	8.50156	2.14699	1.10231	1.87e-17	2.02e-15	Up	22.0943	27.4933	29.2268	51.9001	57.457	70.4145	F3H9.6	non-classical arabinogalactan protein 31 [Cucumis sativus]	GO:0005576,GO:0009505,GO:0005886,GO:0009506,GO:0009753	extracellular region|plant-type cell wall|plasma membrane|plasmodesma|response to jasmonic acid
Csa4G664550	206.813	0.217221	5.07781	2.14802	1.10301	3.82e-07	7.31e-06	Up	2.13673	4.64594	4.073	7.72878	7.19141	9.7451	F4P9.33	mitotic spindle checkpoint protein BUBR1 [Cucumis sativus]	GO:0010369,GO:0000778,GO:0005737,GO:0000776,GO:0005828,GO:0005815,GO:0005876,GO:0004672,GO:0051754,GO:0007094	chromocenter|condensed nuclear chromosome kinetochore|cytoplasm|kinetochore|kinetochore microtubule|microtubule organizing center|spindle microtubule|protein kinase activity|meiotic sister chromatid cohesion, centromeric|mitotic spindle assembly checkpoint
Csa1G009590	239.786	0.169771	6.53531	2.15772	1.1095	6.35e-11	2.78e-09	Up	4.74272	5.58666	4.1038	10.5423	10.1513	12.5511		uncharacterized protein LOC101218840 [Cucumis sativus]
Csa5G570400	268.866	0.168378	6.60495	2.16164	1.11213	3.98e-11	1.83e-09	Up	12.9782	15.8916	14.2877	27.0537	34.707	37.4468	T15D22.2	10 kDa chaperonin, mitochondrial [Cucumis sativus]	GO:0005759,GO:0005739,GO:0005524,GO:0051087,GO:0005507,GO:0046872,GO:0051082,GO:0051085,GO:0009408	mitochondrial matrix|mitochondrion|ATP binding|chaperone binding|copper ion binding|metal ion binding|unfolded protein binding|chaperone cofactor-dependent protein refolding|response to heat
Csa1G395600	189.523	0.186642	5.96072	2.16223	1.11252	2.51e-09	8.27e-08	Up	2.07512	2.68043	2.69697	4.73037	6.21364	6.15909		uncharacterized protein LOC101211203 [Cucumis sativus]
Csa7G290470	165.348	0.220438	5.07317	2.17094	1.11832	3.91e-07	7.48e-06	Up	1.34866	1.81895	1.67626	2.97913	3.16342	5.04953	At1g34355	FHA domain-containing protein PS1 [Cucumis sativus]	GO:0051321,GO:0009555	meiotic cell cycle|pollen development
Csa7G239590	24.5984	0.429807	2.60288	2.17157	1.11874	0.0092443	0.039833	Up	2.61353	3.22128	4.30252	6.90169	7.59355	8.86796		hypothetical protein Csa_015909 [Cucumis sativus]
Csa2G009300	180.972	0.188839	5.94642	2.17786	1.12291	2.74e-09	8.97e-08	Up	1.81728	1.7919	2.34371	3.94757	4.92768	4.90552	T12J2	DNA replication licensing factor MCM5 [Cucumis sativus]	GO:0005737,GO:0042555,GO:0005634,GO:0000347,GO:0005524,GO:0003688,GO:0004386,GO:0007049,GO:0006270,GO:0006268	cytoplasm|MCM complex|nucleus|THO complex|ATP binding|DNA replication origin binding|helicase activity|cell cycle|DNA replication initiation|DNA unwinding involved in DNA replication	csv03030	DNA replication
Csa1G042550	339.161	0.15381	7.30212	2.1782	1.12314	2.83e-13	1.81e-11	Up	2.58639	3.40535	3.74901	6.78077	7.44189	8.29768	NACK1	kinesin-like protein NACK1 [Cucumis sativus]	GO:0005874,GO:0005634,GO:0009524,GO:0005524,GO:0008017,GO:0003777,GO:0000919,GO:0007018	microtubule|nucleus|phragmoplast|ATP binding|microtubule binding|microtubule motor activity|cell plate assembly|microtubule-based movement
Csa7G414460	34.9229	0.388939	2.88946	2.17924	1.12382	0.00385904	0.0199089	Up	1.12008	1.1658	1.81159	2.22635	4.02011	3.20047	F14M4	short-chain dehydrogenase reductase 3b [Cucumis sativus]	GO:0016491	oxidoreductase activity
Csa3G891640	358.743	0.194789	5.79855	2.18782	1.12949	6.69e-09	1.94e-07	Up	1.70906	3.38176	2.7375	4.89882	5.96824	7.23845	MSL3.5	kinesin-like protein KIN-4C [Cucumis sativus]	GO:0005871,GO:0005874,GO:0009506,GO:0005524,GO:0016887,GO:0008017,GO:0003777,GO:0071555,GO:0007018,GO:0007052	kinesin complex|microtubule|plasmodesma|ATP binding|ATPase activity|microtubule binding|microtubule motor activity|cell wall organization|microtubule-based movement|mitotic spindle organization
Csa2G338830	486.731	0.154829	7.29987	2.18894	1.13023	2.88e-13	1.83e-11	Up	5.85575	8.58148	10.2219	19.7974	19.2541	18.1039	T2K12.140	NAC domain-containing protein 2 [Cucumis sativus]	GO:0005634,GO:0003677,GO:0043424,GO:0009793,GO:0010150,GO:0045892,GO:0045893,GO:0008361,GO:0010099,GO:0009620,GO:0009753,GO:0009416,GO:0009751,GO:0009744,GO:0009611,GO:0016032	nucleus|DNA binding|protein histidine kinase binding|embryo development ending in seed dormancy|leaf senescence|negative regulation of transcription, DNA-templated|positive regulation of transcription, DNA-templated|regulation of cell size|regulation of photomorphogenesis|response to fungus|response to jasmonic acid|response to light stimulus|response to salicylic acid|response to sucrose|respons…
Csa1G673510	68.2229	0.269969	4.18782	2.18947	1.13058	2.82e-05	0.000312477	Up	3.82256	4.686	4.72639	10.5609	8.36951	11.9556	T6K12.4	probable inactive ATP-dependent zinc metalloprotease FTSHI 5, chloroplastic [Cucumis sativus]	GO:0009507,GO:0009941,GO:0031969,GO:0016021,GO:0005739,GO:0009506,GO:0005524,GO:0004176,GO:0004222,GO:0006508	chloroplast|chloroplast envelope|chloroplast membrane|integral component of membrane|mitochondrion|plasmodesma|ATP binding|ATP-dependent peptidase activity|metalloendopeptidase activity|proteolysis
Csa4G638500	34.0357	0.375931	3.00994	2.19091	1.13153	0.002613	0.0145123	Up	0.222068	0.179154	0.241388	0.464326	0.61071	0.421815	F17A8.30	CST complex subunit CTC1 isoform X1 [Cucumis sativus]	GO:1990879,GO:0003697,GO:0042162,GO:0045740,GO:0010833	CST complex|single-stranded DNA binding|telomeric DNA binding|positive regulation of DNA replication|telomere maintenance via telomere lengthening
Csa3G047810	237.846	0.210418	5.38581	2.19355	1.13327	7.21e-08	1.65e-06	Up	6.2251	10.5481	10.3057	16.0631	19.9565	26.8752		extensin [Cucumis sativus]
Csa6G055410	136.103	0.19992	5.66893	2.19365	1.13333	1.44e-08	3.87e-07	Up	2.70059	2.43829	3.1462	6.11992	6.27275	6.97275	K19P17.5	putative serine/threonine-protein kinase [Cucumis sativus]
Csa4G293320	286.704	0.203395	5.58471	2.19756	1.1359	2.34e-08	5.97e-07	Up	1.60807	3.13125	2.55714	4.73806	5.09949	7.13838	F3G5.21	kinesin-like protein KIN-5B [Cucumis sativus]	GO:0005737,GO:0005871,GO:0005874,GO:0005819,GO:0005524,GO:0008574,GO:0016887,GO:0008017,GO:0003777,GO:0007018	cytoplasm|kinesin complex|microtubule|spindle|ATP binding|ATP-dependent microtubule motor activity, plus-end-directed|ATPase activity|microtubule binding|microtubule motor activity|microtubule-based movement
Csa6G410060	188.056	0.181899	6.24476	2.19758	1.13592	4.24e-10	1.6e-08	Up	3.66182	4.38189	4.47269	8.35864	9.77045	11.1234		uncharacterized protein LOC101222797 [Cucumis sativus]
Csa3G207350	76.0579	0.274277	4.16106	2.20577	1.14128	3.17e-05	0.000347101	Up	0.642474	0.844666	0.856416	2.00394	1.28388	2.22411	MVI11.13	protein CHROMATIN REMODELING 25 [Cucumis sativus]	GO:0005634,GO:0005524,GO:0003677,GO:0004386,GO:0007049,GO:0051301,GO:0071480,GO:0071248,GO:0000724,GO:0045003,GO:0051701,GO:0010332,GO:0016032	nucleus|ATP binding|DNA binding|helicase activity|cell cycle|cell division|cellular response to gamma radiation|cellular response to metal ion|double-strand break repair via homologous recombination|double-strand break repair via synthesis-dependent strand annealing|interaction with host|response to gamma radiation|viral process	csv03440	Homologous recombination
Csa2G408940	63.2234	0.27158	4.20476	2.20676	1.14193	2.61e-05	0.000292102	Up	2.50334	2.89153	3.04902	7.23827	6.23435	6.36098	T13C7	PREDICTED: uncharacterized protein LOC103496015 [Cucumis melo]
Csa7G440590	189.536	0.198791	5.7527	2.2093	1.14359	8.78e-09	2.48e-07	Up	1.71037	2.33932	2.46673	4.19238	4.79029	6.30598	T16N11.16	centromere protein C isoform X3 [Cucumis sativus]	GO:0000775,GO:0000778,GO:0000776,GO:0005634,GO:0019237,GO:0051315,GO:0051455,GO:0051301,GO:0051382	chromosome, centromeric region|condensed nuclear chromosome kinetochore|kinetochore|nucleus|centromeric DNA binding|attachment of mitotic spindle microtubules to kinetochore|attachment of spindle microtubules to kinetochore involved in homologous chromosome segregation|cell division|kinetochore assembly
Csa4G658580	580.806	0.169242	6.78903	2.21759	1.14899	1.13e-11	5.56e-10	Up	6.67427	10.7005	10.2768	17.968	19.9841	27.0229	F15M4.19	G2/mitotic-specific cyclin-2 [Cucumis sativus]	GO:0005813,GO:0000307,GO:0005737,GO:0005634,GO:0016538,GO:0019901,GO:0051301,GO:0000278,GO:0045787,GO:0008284,GO:0006468,GO:0000079,GO:0007088	centrosome|cyclin-dependent protein kinase holoenzyme complex|cytoplasm|nucleus|cyclin-dependent protein serine/threonine kinase regulator activity|protein kinase binding|cell division|mitotic cell cycle|positive regulation of cell cycle|positive regulation of cell proliferation|protein phosphorylation|regulation of cyclin-dependent protein serine/threonine kinase activity|regulation of mitotic n…
Csa3G903540	5624.67	0.153263	7.4972	2.21767	1.14904	6.52e-14	4.49e-12	Up	89.1002	134.46	133.035	209.354	298.184	328.696	CYP88D6	beta-amyrin 11-oxidase-like [Cucumis sativus]	GO:0016021,GO:0020037,GO:0005506,GO:0004497,GO:0016705	integral component of membrane|heme binding|iron ion binding|monooxygenase activity|oxidoreductase activity, acting on paired donors, with incorporation or reduction of molecular oxygen	csv00996	Biosynthesis of various alkaloids
Csa7G239600	142.275	0.192424	5.97236	2.21795	1.14922	2.34e-09	7.77e-08	Up	2.22565	2.32068	2.20769	4.91635	5.37788	5.67416	F3O9.13	putative cyclin-B3-1 [Cucumis sativus]	GO:0000307,GO:0005737,GO:0005634,GO:0016538,GO:0019901,GO:0051301,GO:0000278,GO:0045787,GO:0008284,GO:0006468,GO:0000079,GO:0007088	cyclin-dependent protein kinase holoenzyme complex|cytoplasm|nucleus|cyclin-dependent protein serine/threonine kinase regulator activity|protein kinase binding|cell division|mitotic cell cycle|positive regulation of cell cycle|positive regulation of cell proliferation|protein phosphorylation|regulation of cyclin-dependent protein serine/threonine kinase activity|regulation of mitotic nuclear divi…
Csa3G627700	93.8012	0.249312	4.61117	2.21856	1.14962	4e-06	5.77e-05	Up	2.14036	4.1127	3.36666	7.01262	7.0911	8.52678	K24G6.15	cyclin-dependent kinase inhibitor 3 [Cucumis sativus]	GO:0005654,GO:0004861,GO:0007050	nucleoplasm|cyclin-dependent protein serine/threonine kinase inhibitor activity|cell cycle arrest
Csa3G019370	1035.15	0.115139	9.98682	2.21894	1.14987	1.74e-23	3.06e-21	Up	23.3349	24.0257	26.0491	56.9988	63.6804	52.626	dl4415w	homeobox-leucine zipper protein HAT4 [Cucumis sativus]	GO:0005634,GO:0003700,GO:0042803,GO:0043565,GO:0008283,GO:0045892,GO:0010017,GO:0009585,GO:0009733,GO:0009735,GO:0010218,GO:0048364,GO:0009641,GO:0010016,GO:0009826	nucleus|DNA-binding transcription factor activity|protein homodimerization activity|sequence-specific DNA binding|cell proliferation|negative regulation of transcription, DNA-templated|red or far-red light signaling pathway|red, far-red light phototransduction|response to auxin|response to cytokinin|response to far red light|root development|shade avoidance|shoot system morphogenesis|unidimension…
Csa6G507140	105.876	0.223922	5.14682	2.22297	1.15249	2.65e-07	5.28e-06	Up	2.04076	2.59271	3.10117	5.65659	6.19768	6.39184	T4O12.13	GDSL esterase/lipase EXL3 [Cucumis sativus]	GO:0005576,GO:0016298,GO:0016042	extracellular region|lipase activity|lipid catabolic process
Csa2G237130	420.513	0.139157	8.29324	2.2254	1.15406	1.1e-16	1.09e-14	Up	1.13709	1.62127	1.4154	3.17603	3.13682	3.55794	K13E13.17	kinesin-like protein KIN-12D [Cucumis sativus]	GO:0005871,GO:0005874,GO:0009524,GO:0005524,GO:0016887,GO:0008017,GO:0003777,GO:0000911,GO:0007018,GO:0000281	kinesin complex|microtubule|phragmoplast|ATP binding|ATPase activity|microtubule binding|microtubule motor activity|cytokinesis by cell plate formation|microtubule-based movement|mitotic cytokinesis
Csa5G614640	101.272	0.253645	4.55054	2.22564	1.15422	5.35e-06	7.41e-05	Up	2.62112	2.86142	3.30926	5.02384	6.81564	8.9773	F28J12.250	replication protein A 14 kDa subunit B [Cucumis sativus]	GO:0005634,GO:0003677,GO:0006310,GO:0006281,GO:0006260	nucleus|DNA binding|DNA recombination|DNA repair|DNA replication	csv03030,csv03420,csv03430,csv03440	DNA replication|Nucleotide excision repair|Mismatch repair|Homologous recombination
Csa1G083760	37.5069	0.384113	3.00752	2.22719	1.15523	0.00263391	0.0146114	Up	1.886	2.28231	1.78268	3.85585	3.34059	6.98116	MGO3.2	DNA-directed RNA polymerase [Cucumis melo var. makuwa]	GO:0005666,GO:0003677,GO:0003899,GO:0046872,GO:0006383	RNA polymerase III complex|DNA binding|DNA-directed 5'-3' RNA polymerase activity|metal ion binding|transcription by RNA polymerase III	csv03020	RNA polymerase
Csa6G088710	2380.89	0.305039	3.78775	2.22748	1.15541	0.000152016	0.00133973	Up	29.553	41.6536	40.1075	56.9774	103.544	101.569	CYP87D18	cytochrome P450 87A3-like [Cucumis sativus]
Csa4G022330	123.497	0.233877	4.94361	2.22869	1.1562	7.67e-07	1.34e-05	Up	1.60944	1.43267	2.0685	3.08478	4.24067	4.79034	MFG13.9	F-box protein At5g51380 [Cucumis sativus]	GO:0019005,GO:0016567,GO:0031146,GO:0006511	SCF ubiquitin ligase complex|protein ubiquitination|SCF-dependent proteasomal ubiquitin-dependent protein catabolic process|ubiquitin-dependent protein catabolic process
Csa2G270740	33.6737	0.379301	3.05342	2.23173	1.15816	0.00226253	0.0128704	Up	0.392863	0.608734	0.758596	1.66375	1.2086	1.29293		uncharacterized protein LOC101219022 [Cucumis sativus]
Csa3G176880	29.2903	0.397664	2.91446	2.23298	1.15897	0.00356308	0.0186863	Up	1.63899	2.96285	2.8402	5.72436	5.46236	6.43935
Csa3G278920	54.8905	0.302059	3.84258	2.23564	1.16068	0.000121746	0.00110373	Up	0.865114	1.32694	1.06606	2.25999	2.39857	3.08991	F16B3.18	LOB domain-containing protein 41 [Cucumis sativus]	GO:0006355	regulation of transcription, DNA-templated
Csa3G099670	72.9501	0.277874	4.1782	2.23614	1.16101	2.94e-05	0.000325184	Up	0.952572	1.39467	1.56067	2.56715	2.84168	3.86623		uncharacterized protein LOC101210465 isoform X1 [Cucumis sativus]
Csa1G025020	3361.18	0.0924878	12.575	2.23927	1.16303	2.9e-36	9.04e-34	Up	99.7255	102.807	99.7823	235.554	254.111	231.644	T10F20.22	probable calcium-binding protein CML27 [Cucumis sativus]	GO:0005886,GO:0005773,GO:0005509	plasma membrane|vacuole|calcium ion binding	csv04626	Plant-pathogen interaction
Csa2G000580	297.303	0.144619	8.04699	2.24039	1.16375	8.49e-16	7.57e-14	Up	4.38814	5.38865	5.01037	12.5764	10.877	11.8269	MIK19.19	histone acetyltransferase type B catalytic subunit [Cucumis sativus]	GO:0000781,GO:0005829,GO:0000790,GO:0005634,GO:0010485,GO:0042393,GO:0006348,GO:0043967	chromosome, telomeric region|cytosol|nuclear chromatin|nucleus|H4 histone acetyltransferase activity|histone binding|chromatin silencing at telomere|histone H4 acetylation
Csa5G220920	86.7174	0.24178	4.81573	2.24131	1.16434	1.47e-06	2.39e-05	Up	1.35167	1.74928	1.40538	3.31035	3.37858	4.07339	SPBC25D12.05	tRNA (guanine(26)-N(2))-dimethyltransferase [Cucumis sativus]	GO:0005739,GO:0031965,GO:0005634,GO:0004809,GO:0000049,GO:0002940	mitochondrion|nuclear membrane|nucleus|tRNA (guanine-N2-)-methyltransferase activity|tRNA binding|tRNA N2-guanine methylation
Csa2G351770	842.593	0.127291	9.1607	2.24401	1.16608	5.16e-20	6.9e-18	Up	19.4049	26.6231	26.147	53.7804	53.1433	65.1068	T22P22_180	protein NDL2 isoform X1 [Cucumis sativus]	GO:0005737,GO:2000012,GO:0040008	cytoplasm|regulation of auxin polar transport|regulation of growth
Csa3G146390	408.553	0.176436	6.61747	2.24631	1.16756	3.65e-11	1.69e-09	Up	2.71704	4.58351	5.10544	8.7004	9.73501	11.0315	MWI23.15	protein tesmin/TSO1-like CXC 2 [Cucumis sativus]	GO:0005634,GO:0003700,GO:0046872,GO:0048444,GO:0051302,GO:0009934	nucleus|DNA-binding transcription factor activity|metal ion binding|floral organ morphogenesis|regulation of cell division|regulation of meristem structural organization
Csa6G498980	147.986	0.22441	5.21357	2.25008	1.16998	1.85e-07	3.84e-06	Up	0.89954	1.41362	1.53445	2.55746	2.76733	3.85544	F20D10.190	uncharacterized protein At4g38062 [Cucumis sativus]
Csa3G815400	28.109	0.420084	2.78525	2.25017	1.17004	0.00534868	0.0257362	Up	0.344305	0.242497	0.255705	0.603357	0.874274	0.544603	177O13.37	putative disease resistance protein RGA1 [Cucumis sativus]	GO:0043531,GO:0005524,GO:0006952	ADP binding|ATP binding|defense response
Csa6G491670	161.703	0.217432	5.38591	2.25178	1.17107	7.21e-08	1.65e-06	Up	3.53034	6.6089	5.16015	10.7741	10.9656	14.8022	K3G17.3	PREDICTED: microtubule-associated protein RP/EB family member 1C-like [Cucumis melo]	GO:0005618,GO:0005881,GO:0005874,GO:0005815,GO:0035371,GO:0005730,GO:0005634,GO:0009524,GO:0005819,GO:0051233,GO:0008017,GO:0051010,GO:0051301,GO:0030865,GO:0035372,GO:1904825,GO:0031110,GO:0051225,GO:0009652	cell wall|cytoplasmic microtubule|microtubule|microtubule organizing center|microtubule plus-end|nucleolus|nucleus|phragmoplast|spindle|spindle midzone|microtubule binding|microtubule plus-end binding|cell division|cortical cytoskeleton organization|protein localization to microtubule|protein localization to microtubule plus-end|regulation of microtubule polymerization or depolymerization|spindle…
Csa2G223670	386.527	0.362192	3.23688	2.25382	1.17237	0.00120844	0.00765281	Up	2.79188	5.81859	6.57533	9.88067	11.582	14.5949	MWI23.15	CRC domain-containing protein TSO1 [Cucumis sativus]	GO:0005634,GO:0003700,GO:0046872,GO:0048444,GO:0051302,GO:0009934	nucleus|DNA-binding transcription factor activity|metal ion binding|floral organ morphogenesis|regulation of cell division|regulation of meristem structural organization
Csa4G290730	52.5707	0.324103	3.62449	2.25747	1.17471	0.000289534	0.00231664	Up	0.632782	0.992636	1.16633	2.11695	1.71072	2.86621		uncharacterized protein LOC101212475 isoform X2 [Cucumis sativus]
Csa5G169010	143.808	0.243717	4.8242	2.25908	1.17574	1.41e-06	2.32e-05	Up	3.55849	5.95936	5.46175	8.7764	10.9473	16.1596		probable serine/threonine-protein kinase kinX isoform X2 [Cucumis sativus]
Csa3G592120	89.8865	0.280758	4.2007	2.26479	1.17938	2.66e-05	0.000296696	Up	1.49427	2.3855	1.99755	3.1277	4.77937	6.21385		uncharacterized protein LOC101209296 [Cucumis sativus]
Csa6G445780	194.9	0.172414	6.8714	2.2732	1.18472	6.36e-12	3.29e-10	Up	5.02593	4.30265	4.49649	11.2311	11.1069	11.2298	PAL17.1	phenylalanine ammonia-lyase [Cucumis sativus]	GO:0005737,GO:0045548,GO:0009800,GO:0006559	cytoplasm|phenylalanine ammonia-lyase activity|cinnamic acid biosynthetic process|L-phenylalanine catabolic process	csv00360,csv00940	Phenylalanine metabolism|Phenylpropanoid biosynthesis
Csa7G029390	1018.67	0.350617	3.39769	2.28356	1.19129	0.000679579	0.00476031	Up	13.011	16.6827	14.5934	21.0464	45.5983	40.3685	HMG1	3-hydroxy-3-methylglutaryl-coenzyme A reductase 1 [Cucumis sativus]	GO:0005789,GO:0016021,GO:0031966,GO:0042170,GO:0004420,GO:0050661,GO:0015936,GO:0008299	endoplasmic reticulum membrane|integral component of membrane|mitochondrial membrane|plastid membrane|hydroxymethylglutaryl-CoA reductase (NADPH) activity|NADP binding|coenzyme A metabolic process|isoprenoid biosynthetic process	csv00900	Terpenoid backbone biosynthesis
Csa6G382920	54.3283	0.320463	3.71991	2.28484	1.19209	0.000199296	0.00168392	Up	1.43218	1.58163	2.68036	5.329	3.52474	4.97205	MPN9.15	E3 ubiquitin ligase BIG BROTHER-related [Cucumis sativus]	GO:0046872,GO:0004842,GO:0051865,GO:0016567	metal ion binding|ubiquitin-protein transferase activity|protein autoubiquitination|protein ubiquitination
Csa5G585410	102.795	0.257855	4.62411	2.28525	1.19235	3.76e-06	5.48e-05	Up	1.08897	1.69117	2.3494	3.45084	4.18762	4.75486	T15B16.11	protein S-acyltransferase 18 [Cucumis sativus]	GO:0030659,GO:0005783,GO:0005789,GO:0005794,GO:0016021,GO:0019706,GO:0018230,GO:0006612	cytoplasmic vesicle membrane|endoplasmic reticulum|endoplasmic reticulum membrane|Golgi apparatus|integral component of membrane|protein-cysteine S-palmitoyltransferase activity|peptidyl-L-cysteine S-palmitoylation|protein targeting to membrane
Csa7G213190	126.272	0.230153	5.1932	2.28981	1.19523	2.07e-07	4.23e-06	Up	3.33761	3.15757	3.8454	6.31644	8.51024	10.3905	MQC12.20	1,4-alpha-glucan-branching enzyme 3, chloroplastic/amyloplastic [Cucumis sativus]	GO:0009501,GO:0009507,GO:0009570,GO:0009536,GO:0003844,GO:0102752,GO:0043169,GO:0005975,GO:0005978,GO:0009791,GO:0019252	amyloplast|chloroplast|chloroplast stroma|plastid|1,4-alpha-glucan branching enzyme activity|1,4-alpha-glucan branching enzyme activity (using a glucosylated glycogenin as primer for glycogen synthesis)|cation binding|carbohydrate metabolic process|glycogen biosynthetic process|post-embryonic development|starch biosynthetic process	csv00500	Starch and sucrose metabolism
Csa1G013800	162.009	0.216994	5.5132	2.29156	1.19633	3.52e-08	8.66e-07	Up	1.8685	2.27457	2.66228	4.05587	5.91381	6.57481	F13G24.220	replication protein A 70 kDa DNA-binding subunit B [Cucumis sativus]	GO:0005662,GO:0000784,GO:0003684,GO:0046872,GO:0043565,GO:0003697,GO:0043047,GO:0006281,GO:0006268,GO:0006261,GO:0000724,GO:0051321,GO:0006289,GO:0010224,GO:0000723,GO:0007004	DNA replication factor A complex|nuclear chromosome, telomeric region|damaged DNA binding|metal ion binding|sequence-specific DNA binding|single-stranded DNA binding|single-stranded telomeric DNA binding|DNA repair|DNA unwinding involved in DNA replication|DNA-dependent DNA replication|double-strand break repair via homologous recombination|meiotic cell cycle|nucleotide-excision repair|response t…	csv03030,csv03420,csv03430,csv03440	DNA replication|Nucleotide excision repair|Mismatch repair|Homologous recombination
Csa6G000650	234.476	0.221897	5.39353	2.29232	1.19681	6.91e-08	1.59e-06	Up	0.578027	1.11979	1.2232	1.8908	2.25941	2.92192	MGD8.20	kinesin-like protein KIN-12C isoform X1 [Cucumis sativus]	GO:0005871,GO:0005874,GO:0009524,GO:0005524,GO:0016887,GO:0008017,GO:0003777,GO:0000911,GO:0007018,GO:0000281	kinesin complex|microtubule|phragmoplast|ATP binding|ATPase activity|microtubule binding|microtubule motor activity|cytokinesis by cell plate formation|microtubule-based movement|mitotic cytokinesis
Csa6G454460	112.486	0.212642	5.62892	2.29254	1.19695	1.81e-08	4.77e-07	Up	2.7742	3.66354	3.70856	8.25438	7.8233	8.65228	MHF15.16	NDR1/HIN1-like protein 3 [Cucumis sativus]	GO:0046658,GO:0005794,GO:0016021,GO:0005886,GO:0009506,GO:0005774,GO:0042742,GO:0009816,GO:0051607,GO:0009617,GO:0009751,GO:0009611	anchored component of plasma membrane|Golgi apparatus|integral component of membrane|plasma membrane|plasmodesma|vacuolar membrane|defense response to bacterium|defense response to bacterium, incompatible interaction|defense response to virus|response to bacterium|response to salicylic acid|response to wounding
Csa3G776990	135.496	0.240374	4.99562	2.2987	1.20082	5.86e-07	1.06e-05	Up	1.65276	2.29259	2.97086	4.89668	4.56746	7.41394	T19N8.15	uncharacterized protein At3g28850 [Cucumis sativus]	GO:0005886,GO:0009055,GO:0015035,GO:0045454	plasma membrane|electron transfer activity|protein disulfide oxidoreductase activity|cell redox homeostasis
Csa3G154330	324.397	0.182159	6.59926	2.30077	1.20212	4.13e-11	1.89e-09	Up	5.06031	8.27049	7.13532	13.3571	16.4916	20.0545		uncharacterized protein LOC101204184 [Cucumis sativus]
Csa3G124980	107.612	0.26987	4.45507	2.30105	1.20229	8.39e-06	0.000110254	Up	1.49064	2.56276	3.45741	4.80575	5.80083	7.6585	F17K2.2	serine/threonine-protein kinase Aurora-3 isoform X3 [Cucumis sativus]	GO:0000775,GO:0005634,GO:0048471,GO:0005819,GO:0005524,GO:0035175,GO:0044022,GO:0007059,GO:0043987,GO:0043988,GO:0016572,GO:0000226,GO:0000278,GO:0032465	chromosome, centromeric region|nucleus|perinuclear region of cytoplasm|spindle|ATP binding|histone kinase activity (H3-S10 specific)|histone kinase activity (H3-S28 specific)|chromosome segregation|histone H3-S10 phosphorylation|histone H3-S28 phosphorylation|histone phosphorylation|microtubule cytoskeleton organization|mitotic cell cycle|regulation of cytokinesis
Csa6G538780	227.947	0.162607	7.3945	2.30122	1.2024	1.42e-13	9.4e-12	Up	1.76385	1.79037	1.79349	3.97733	4.53521	4.59986	K15C23	DNA replication licensing factor MCM6 isoform X1 [Cucumis sativus]	GO:0042555,GO:0000347,GO:0005524,GO:0003677,GO:0003678,GO:0046872,GO:0007049,GO:0006270,GO:0006268	MCM complex|THO complex|ATP binding|DNA binding|DNA helicase activity|metal ion binding|cell cycle|DNA replication initiation|DNA unwinding involved in DNA replication	csv03030	DNA replication
Csa3G790970	53.9973	0.316943	3.80704	2.30796	1.20662	0.00014064	0.00124998	Up	1.03029	1.37873	1.18601	2.33208	2.56586	3.94273		uncharacterized protein LOC101214784 [Cucumis sativus]
Csa4G312810	20.038	0.477748	2.52572	2.30802	1.20666	0.0115462	0.0476874	Up	1.49229	1.91288	2.01707	5.33912	4.59087	3.3579	T16O11.19	kinetochore protein SPC24 homolog [Cucumis sativus]	GO:0000776,GO:0005634,GO:0007049,GO:0051301,GO:0009933,GO:0051781,GO:0051983	kinetochore|nucleus|cell cycle|cell division|meristem structural organization|positive regulation of cell division|regulation of chromosome segregation
Csa7G428210	117.788	0.239974	5.03788	2.31171	1.20896	4.71e-07	8.77e-06	Up	1.542	2.80441	2.99278	5.32431	5.51685	7.12308		uncharacterized protein LOC101206114 [Cucumis sativus]
Csa3G728140	25.7579	0.425668	2.84067	2.31206	1.20918	0.00450186	0.0224632	Up	0.459749	0.402957	0.318679	0.939936	0.811951	1.17682	F8M21_190	hypothetical protein Csa_000806 [Cucumis sativus]
Csa6G088700	2007.17	0.155992	7.75266	2.31234	1.20935	9e-15	6.9e-13	Up	34.9977	45.4921	47.2392	75.4665	123.269	113.856	MDN11.1	BAHD acyltransferase At5g47980-like [Cucumis sativus]	GO:0016747	transferase activity, transferring acyl groups other than amino-acyl groups	csv00996	Biosynthesis of various alkaloids
Csa2G427860	94.9809	0.271828	4.45479	2.31488	1.21094	8.4e-06	0.000110254	Up	1.39856	2.79745	2.70054	4.20725	6.14646	6.50805	K3G17.3	microtubule-associated protein RP/EB family member 1C [Cucumis sativus]	GO:0005618,GO:0005881,GO:0005874,GO:0005815,GO:0035371,GO:0005730,GO:0005634,GO:0009524,GO:0005819,GO:0051233,GO:0008017,GO:0051010,GO:0051301,GO:0030865,GO:0035372,GO:1904825,GO:0031110,GO:0051225,GO:0009652	cell wall|cytoplasmic microtubule|microtubule|microtubule organizing center|microtubule plus-end|nucleolus|nucleus|phragmoplast|spindle|spindle midzone|microtubule binding|microtubule plus-end binding|cell division|cortical cytoskeleton organization|protein localization to microtubule|protein localization to microtubule plus-end|regulation of microtubule polymerization or depolymerization|spindle…
Csa1G002690	662.352	0.167997	7.22348	2.31903	1.21352	5.07e-13	3.07e-11	Up	6.86262	8.55073	9.47052	14.9019	21.3467	24.9567	T29H11_270	hypothetical protein Csa_013931 [Cucumis sativus]	GO:0009507,GO:0009570,GO:0005829,GO:0009295,GO:0009508,GO:0003676	chloroplast|chloroplast stroma|cytosol|nucleoid|plastid chromosome|nucleic acid binding
Csa7G390200	443.919	0.368135	3.30124	2.32189	1.2153	0.000962576	0.00634739	Up	5.00296	12.5914	10.6945	20.4924	21.1672	27.5157	F4C21.2	rho GTPase-activating protein 2 [Cucumis sativus]	GO:0005096,GO:0007165	GTPase activator activity|signal transduction
Csa3G734250	143.381	0.222027	5.47443	2.32216	1.21547	4.39e-08	1.05e-06	Up	1.39664	1.74874	2.60463	4.28304	4.433	5.43967	T1E22_130	kinesin-like protein KIN-10B isoform X1 [Cucumis sativus]	GO:0009507,GO:0005871,GO:0005874,GO:0005524,GO:0016887,GO:0008017,GO:0003777,GO:0007018	chloroplast|kinesin complex|microtubule|ATP binding|ATPase activity|microtubule binding|microtubule motor activity|microtubule-based movement
Csa1G077230	30.8425	0.384166	3.164	2.32222	1.2155	0.00155616	0.009481	Up	0.852738	0.840827	0.664968	1.91772	1.79263	2.14723	YKR070W	uncharacterized protein YKR070W [Cucumis sativus]	GO:0005739,GO:0046474	mitochondrion|glycerophospholipid biosynthetic process
Csa5G638410	248.549	0.194781	6.24793	2.32459	1.21698	4.16e-10	1.57e-08	Up	2.72067	4.24118	4.68771	8.10506	8.84813	11.7442	F11M21.29	uncharacterized protein LOC101204950 [Cucumis sativus]	GO:0009941,GO:0005874,GO:0005654,GO:0005634,GO:0009524,GO:0005819,GO:0008017,GO:0032147,GO:0051301,GO:0000278,GO:0090307,GO:0060236,GO:0051225	chloroplast envelope|microtubule|nucleoplasm|nucleus|phragmoplast|spindle|microtubule binding|activation of protein kinase activity|cell division|mitotic cell cycle|mitotic spindle assembly|regulation of mitotic spindle organization|spindle assembly
Csa3G132540	57.5516	0.313261	3.88723	2.32578	1.21772	0.000101396	0.000943538	Up	1.0193	1.70424	1.88922	3.21647	3.2721	4.89109		uncharacterized protein LOC101216371 [Cucumis sativus]
Csa4G002500	611.015	0.163459	7.45266	2.32656	1.2182	9.15e-14	6.17e-12	Up	4.02557	5.02593	6.92571	12.1675	11.6715	15.609	F22D16.26	cellulose synthase-like protein D5 [Cucumis sativus]	GO:0005794,GO:0000139,GO:0016021,GO:0005886,GO:0005802,GO:0016760,GO:0046527,GO:0051753,GO:0000919,GO:0042546,GO:0071555,GO:0030244,GO:0009833,GO:0006970,GO:0009651,GO:0009414,GO:0048367	Golgi apparatus|Golgi membrane|integral component of membrane|plasma membrane|trans-Golgi network|cellulose synthase (UDP-forming) activity|glucosyltransferase activity|mannan synthase activity|cell plate assembly|cell wall biogenesis|cell wall organization|cellulose biosynthetic process|plant-type primary cell wall biogenesis|response to osmotic stress|response to salt stress|response to water d…	csv00520	Amino sugar and nucleotide sugar metabolism
Csa6G181540	31.1515	0.433823	2.81763	2.33327	1.22235	0.00483796	0.0237721	Up	0.350951	0.798575	0.364897	0.800293	1.3565	1.59096	MQJ2.8	glucan endo-1,3-beta-glucosidase 9 [Cucumis sativus]	GO:0031225,GO:0046658,GO:0005618,GO:0005576,GO:0005886,GO:0042973,GO:0005975,GO:0071555,GO:0006952	anchored component of membrane|anchored component of plasma membrane|cell wall|extracellular region|plasma membrane|glucan endo-1,3-beta-D-glucosidase activity|carbohydrate metabolic process|cell wall organization|defense response
Csa7G069700	175.675	0.195612	6.25394	2.33487	1.22334	4e-10	1.52e-08	Up	1.44172	1.95901	2.15711	4.00792	4.34513	5.42566		uncharacterized protein LOC101210501 [Cucumis sativus]
Csa4G370550	65.6235	0.294153	4.16352	2.33709	1.22471	3.13e-05	0.000343778	Up	1.40881	2.27817	2.98817	5.70288	6.06765	4.70978	T26F17.14	ethylene-responsive transcription factor ERF014 [Cucumis sativus]	GO:0005634,GO:0003700,GO:0043565,GO:0044212,GO:0071497,GO:0034605,GO:0009873,GO:0045893,GO:0009753,GO:0009751	nucleus|DNA-binding transcription factor activity|sequence-specific DNA binding|transcription regulatory region DNA binding|cellular response to freezing|cellular response to heat|ethylene-activated signaling pathway|positive regulation of transcription, DNA-templated|response to jasmonic acid|response to salicylic acid
Csa2G381800	71.6268	0.26848	4.56527	2.33866	1.22568	4.99e-06	6.96e-05	Up	1.0317	1.04478	1.50757	2.73633	3.23108	2.92799		uncharacterized protein LOC101207652 [Cucumis sativus]
Csa1G015600	415.65	0.133605	9.19145	2.34245	1.22802	3.88e-20	5.3e-18	Up	5.3694	6.91565	6.86493	16.8076	15.807	15.0578		uncharacterized protein LOC101220579 [Cucumis sativus]
Csa2G371110	205.873	0.179905	6.84516	2.34807	1.23148	7.64e-12	3.9e-10	Up	4.96205	5.47987	4.12739	14.1214	11.0724	11.3568	F14M13.10	mitochondrial uncoupling protein 5 [Cucumis sativus]	GO:0016021,GO:0005743,GO:0015297,GO:0005310,GO:0015140,GO:0015131,GO:0017077,GO:0015141,GO:0015116,GO:0015117,GO:0071423,GO:0006839,GO:0015729,GO:0035435,GO:1902600,GO:0071422,GO:0008272,GO:0015709	integral component of membrane|mitochondrial inner membrane|antiporter activity|dicarboxylic acid transmembrane transporter activity|malate transmembrane transporter activity|oxaloacetate transmembrane transporter activity|oxidative phosphorylation uncoupler activity|succinate transmembrane transporter activity|sulfate transmembrane transporter activity|thiosulfate transmembrane transporter activ…
Csa4G063990	320.019	0.185682	6.63304	2.34833	1.23163	3.29e-11	1.53e-09	Up	3.43346	4.85087	6.44713	11.8128	10.4576	14.4139	F12K11.5	protein JASON isoform X1 [Cucumis sativus]	GO:0007142,GO:0009556,GO:0006355	male meiosis II|microsporogenesis|regulation of transcription, DNA-templated
Csa3G444600	50.8836	0.327848	3.76397	2.3522	1.23401	0.000167234	0.00145439	Up	0.561619	0.704803	1.0617	1.53964	1.93718	2.32505		uncharacterized protein LOC105434902 isoform X1 [Cucumis sativus]
Csa1G386570	41.6619	0.339744	3.6363	2.35448	1.23541	0.000276579	0.00223652	Up	0.500463	0.849869	0.722708	1.53476	1.76771	1.87687	F18E5.150	anaphase-promoting complex subunit 4 [Cucumis sativus]	GO:0005680,GO:0034399,GO:0005634,GO:0019903,GO:0031145,GO:0007049,GO:0051301,GO:0009793,GO:0048481,GO:0045842,GO:0070979	anaphase-promoting complex|nuclear periphery|nucleus|protein phosphatase binding|anaphase-promoting complex-dependent catabolic process|cell cycle|cell division|embryo development ending in seed dormancy|plant ovule development|positive regulation of mitotic metaphase/anaphase transition|protein K11-linked ubiquitination	csv04120	Ubiquitin mediated proteolysis
Csa3G822130	111.379	0.237458	5.20297	2.35461	1.23549	1.96e-07	4.04e-06	Up	0.709665	0.837408	0.762057	1.46277	1.92074	2.40588	SPBC776.13	condensin complex subunit 1 [Cucumis sativus]	GO:0000779,GO:0000778,GO:0005737,GO:0000799,GO:0005730,GO:0005634,GO:0035327,GO:0003682,GO:0042393,GO:0051301,GO:0051304,GO:0010032,GO:0007076	condensed chromosome, centromeric region|condensed nuclear chromosome kinetochore|cytoplasm|nuclear condensin complex|nucleolus|nucleus|transcriptionally active chromatin|chromatin binding|histone binding|cell division|chromosome separation|meiotic chromosome condensation|mitotic chromosome condensation
Csa5G174630	79.5466	0.260548	4.74591	2.35632	1.23654	2.08e-06	3.25e-05	Up	0.994776	0.837836	1.09895	2.05496	2.42275	2.88683	F24A6.80	monocopper oxidase-like protein SKS1 [Cucumis sativus]	GO:0031225,GO:0046658,GO:0005886,GO:0009506,GO:0005507,GO:0016722	anchored component of membrane|anchored component of plasma membrane|plasma membrane|plasmodesma|copper ion binding|oxidoreductase activity, oxidizing metal ions
Csa7G041900	191.543	0.20616	5.99927	2.35677	1.23681	1.98e-09	6.69e-08	Up	5.93319	6.1069	5.68194	10.8533	15.264	18.4031		uncharacterized protein LOC101204548 [Cucumis sativus]
Csa4G425740	591.931	0.16807	7.36046	2.35719	1.23707	1.83e-13	1.21e-11	Up	7.05742	11.3525	10.9349	19.7756	23.7832	29.6848		G2/mitotic-specific cyclin S13-7 [Cucumis sativus]	GO:0000307,GO:0005737,GO:0005634,GO:0016538,GO:0019901,GO:0051301,GO:0000278,GO:0045787,GO:0008284,GO:0006468,GO:0000079,GO:0007088	cyclin-dependent protein kinase holoenzyme complex|cytoplasm|nucleus|cyclin-dependent protein serine/threonine kinase regulator activity|protein kinase binding|cell division|mitotic cell cycle|positive regulation of cell cycle|positive regulation of cell proliferation|protein phosphorylation|regulation of cyclin-dependent protein serine/threonine kinase activity|regulation of mitotic nuclear divi…
Csa2G108700	104.183	0.265017	4.66939	2.35785	1.23747	3.02e-06	4.51e-05	Up	2.17257	2.56226	3.18904	5.182	8.99892	5.56874	T2P11.3	origin of replication complex subunit 6 isoform X1 [Cucumis sativus]	GO:0005664,GO:0000808,GO:0003688,GO:0006260,GO:0006270,GO:0009555	nuclear origin of replication recognition complex|origin recognition complex|DNA replication origin binding|DNA replication|DNA replication initiation|pollen development
Csa6G501280	164.813	0.21364	5.80308	2.36161	1.23977	6.51e-09	1.9e-07	Up	2.57365	3.31593	4.21011	6.77006	8.33981	10.185		uncharacterized protein LOC101215210 [Cucumis sativus]
Csa3G176870	709.746	0.14161	8.77093	2.36535	1.24205	1.77e-18	2.09e-16	Up	8.05838	11.2068	10.1948	21.927	22.4502	29.672	K17N15.15	65-kDa microtubule-associated protein 3 [Cucumis sativus]	GO:0055028,GO:0005874,GO:0005634,GO:0009524,GO:0009574,GO:0008017,GO:0000911,GO:0052096,GO:0000226,GO:0046785,GO:0000280,GO:0009624	cortical microtubule|microtubule|nucleus|phragmoplast|preprophase band|microtubule binding|cytokinesis by cell plate formation|formation by symbiont of syncytium involving giant cell for nutrient acquisition from host|microtubule cytoskeleton organization|microtubule polymerization|nuclear division|response to nematode
Csa6G411180	84.69	0.269798	4.60944	2.36791	1.24362	4.04e-06	5.82e-05	Up	1.06135	1.22094	2.17639	3.82742	3.8093	3.53808	F20B24.20	F-box protein At1g10780 [Cucumis sativus]	GO:0009506	plasmodesma
Csa5G321480	22.258	0.449531	2.77265	2.37247	1.24639	0.00556014	0.0265066	Up	0.769909	0.607324	0.640403	1.83638	1.73693	1.53993	ATPA	ATPase subunit 1 [Cucumis sativus]	GO:0005743,GO:0045261,GO:0005524,GO:0046933,GO:0015986	mitochondrial inner membrane|proton-transporting ATP synthase complex, catalytic core F(1)|ATP binding|proton-transporting ATP synthase activity, rotational mechanism|ATP synthesis coupled proton transport	csv00190	Oxidative phosphorylation
Csa7G197290	108.013	0.239063	5.23362	2.38034	1.25117	1.66e-07	3.49e-06	Up	0.662332	0.907057	0.777922	1.74279	1.66026	2.54963	T32N15.10	kinesin-like protein KIN-14F [Cucumis sativus]	GO:0005871,GO:0005874,GO:0005739,GO:0005524,GO:0016887,GO:0008017,GO:0003777,GO:0009060,GO:0007018,GO:0009845	kinesin complex|microtubule|mitochondrion|ATP binding|ATPase activity|microtubule binding|microtubule motor activity|aerobic respiration|microtubule-based movement|seed germination
Csa1G077220	130.898	0.207266	6.07623	2.39396	1.2594	1.23e-09	4.32e-08	Up	1.89766	2.29282	1.97307	4.89059	4.6868	6.15734	NTF6	mitogen-activated protein kinase homolog NTF6 [Cucumis sativus]	GO:0005622,GO:0005524,GO:0004707	intracellular|ATP binding|MAP kinase activity
Csa7G071520	134.398	0.213398	5.9235	2.40171	1.26406	3.15e-09	1.01e-07	Up	2.69819	1.89599	2.70867	6.91125	6.07444	5.74901	F17I5.110	probable protein phosphatase 2C 63 [Cucumis sativus]	GO:0046872,GO:0004722	metal ion binding|protein serine/threonine phosphatase activity
Csa3G895740	93.8619	0.276573	4.57564	2.4041	1.2655	4.75e-06	6.71e-05	Up	1.08763	2.50236	1.88476	3.60496	4.76549	5.5445	F14J22.1	U-box domain-containing protein 26 [Cucumis sativus]	GO:0061630,GO:0009814,GO:0016567	ubiquitin protein ligase activity|defense response, incompatible interaction|protein ubiquitination
Csa5G167720	25.282	0.433294	2.92389	2.40644	1.2669	0.00345688	0.0182299	Up	0.248314	0.279823	0.258181	0.525798	0.618403	0.874228	F5E19.30	origin of replication complex subunit 3 [Cucumis sativus]	GO:0031261,GO:0005664,GO:0005656,GO:0000808,GO:0003688,GO:0006260,GO:0006270,GO:0048527,GO:0006267,GO:0009744	DNA replication preinitiation complex|nuclear origin of replication recognition complex|nuclear pre-replicative complex|origin recognition complex|DNA replication origin binding|DNA replication|DNA replication initiation|lateral root development|pre-replicative complex assembly involved in nuclear cell cycle DNA replication|response to sucrose
Csa1G008550	253.95	0.190785	6.64728	2.40861	1.2682	2.99e-11	1.39e-09	Up	2.5156	3.64104	4.1753	7.00679	9.49028	9.84219	T8E3.2	LRR receptor-like serine/threonine-protein kinase FEI 2 [Cucumis sativus]
Csa5G622440	21.1997	0.467306	2.71828	2.41206	1.27027	0.00656229	0.0302438	Up	0.373361	0.644256	0.727871	1.62206	1.24432	1.60023
Csa5G606490	61.9929	0.321236	3.95536	2.41263	1.27061	7.64e-05	0.000741975	Up	1.36051	2.06385	2.28507	3.10243	5.36595	6.11149	F10D13.22	cell division topological specificity factor homolog, chloroplastic [Cucumis sativus]	GO:0009507,GO:0009706,GO:0051117,GO:0042802,GO:0051301,GO:0010020,GO:0032955	chloroplast|chloroplast inner membrane|ATPase binding|identical protein binding|cell division|chloroplast fission|regulation of division septum assembly
Csa3G026150	1480.25	0.12725	10.0069	2.41728	1.27338	1.42e-23	2.52e-21	Up	28.882	36.9313	38.2347	76.8605	85.607	104.645	TPRP-F1	36.4 kDa proline-rich protein [Cucumis sativus]
Csa7G431340	86.7865	0.254149	5.01131	2.41767	1.27362	5.41e-07	9.88e-06	Up	1.09816	1.67063	2.02261	3.94502	3.73228	4.60586	T24D18.17	tubby-like protein 8 isoform X1 [Cucumis sativus]	GO:0035091	phosphatidylinositol binding
Csa1G063570	224.342	0.182494	6.97935	2.4178	1.27369	2.97e-12	1.62e-10	Up	1.06529	1.72809	1.72693	3.72356	3.52391	4.34491		abnormal spindle-like microcephaly-associated protein homolog isoform X1 [Cucumis sativus]
Csa5G375770	164.937	0.211212	6.05498	2.42652	1.27889	1.4e-09	4.89e-08	Up	1.04078	1.79592	1.59138	3.19174	3.68839	4.50999	T32E8.5	serine/threonine-protein kinase MPS1 isoform X1 [Cucumis sativus]
Csa5G603940	325.252	0.179482	7.1286	2.42747	1.27945	1.01e-12	5.97e-11	Up	3.73448	5.83034	6.58914	14.1999	15.4634	11.7924	F3I6.10	probable galacturonosyltransferase-like 9 [Cucumis sativus]	GO:0005794,GO:0000139,GO:0016021,GO:0047262,GO:0071555,GO:0045489	Golgi apparatus|Golgi membrane|integral component of membrane|polygalacturonate 4-alpha-galacturonosyltransferase activity|cell wall organization|pectin biosynthetic process
Csa7G213180	118.46	0.232752	5.51197	2.43332	1.28292	3.55e-08	8.69e-07	Up	1.6081	1.50636	2.42441	4.05482	5.1945	5.05439	MQC12.20	1,4-alpha-glucan-branching enzyme 3, chloroplastic/amyloplastic [Cucumis sativus]	GO:0009501,GO:0009507,GO:0009570,GO:0009536,GO:0003844,GO:0102752,GO:0043169,GO:0005975,GO:0005978,GO:0009791,GO:0019252	amyloplast|chloroplast|chloroplast stroma|plastid|1,4-alpha-glucan branching enzyme activity|1,4-alpha-glucan branching enzyme activity (using a glucosylated glycogenin as primer for glycogen synthesis)|cation binding|carbohydrate metabolic process|glycogen biosynthetic process|post-embryonic development|starch biosynthetic process	csv00500	Starch and sucrose metabolism
Csa5G428440	2999.3	0.343069	3.74704	2.43766	1.2855	0.000178932	0.00153575	Up	44.4662	52.9127	51.8157	76.1956	165.057	143.733		seed lectin [Cucumis sativus]	GO:0030246,GO:0030598,GO:0017148	carbohydrate binding|rRNA N-glycosylase activity|negative regulation of translation
Csa7G071630	64.2908	0.301277	4.26751	2.43801	1.28571	1.98e-05	0.000231818	Up	2.23253	2.70451	2.18861	4.23829	7.2606	6.97146		uncharacterized protein LOC101219067 isoform X2 [Cucumis sativus]
Csa3G172990	258.725	0.176173	7.31165	2.44209	1.28812	2.64e-13	1.69e-11	Up	1.20485	1.99104	1.8443	4.13966	3.96972	4.94885	MDB19.16	kinesin-like protein KIN-12B [Cucumis sativus]	GO:0005871,GO:0005874,GO:0009524,GO:0005524,GO:0008574,GO:0016887,GO:0008017,GO:0003777,GO:0007112,GO:0055046,GO:0007018,GO:0080175	kinesin complex|microtubule|phragmoplast|ATP binding|ATP-dependent microtubule motor activity, plus-end-directed|ATPase activity|microtubule binding|microtubule motor activity|male meiosis cytokinesis|microgametogenesis|microtubule-based movement|phragmoplast microtubule organization
Csa3G543180	351.399	0.192733	6.68444	2.44242	1.28831	2.32e-11	1.1e-09	Up	2.36841	4.82255	4.66479	8.95594	10.406	11.2033		titin homolog [Cucumis sativus]
Csa3G889780	56.3294	0.306285	4.20878	2.44373	1.28909	2.57e-05	0.0002878	Up	1.26904	1.45986	1.40743	2.85394	3.29675	4.62324	T32G9.32	protein EXORDIUM-like 1 [Cucumis sativus]	GO:0048046,GO:0005615,GO:0005794,GO:0009505,GO:0001666	apoplast|extracellular space|Golgi apparatus|plant-type cell wall|response to hypoxia
Csa3G146560	76.0999	0.298054	4.32735	2.44491	1.28978	1.51e-05	0.000183326	Up	0.752533	1.43767	0.929144	2.21162	2.21862	3.67894	dl3135c	uncharacterized protein LOC101220408 [Cucumis sativus]
Csa2G370520	163.692	0.219317	5.8966	2.45075	1.29322	3.71e-09	1.16e-07	Up	1.93616	3.28792	2.4325	5.11293	7.1973	7.57808	MSL3.5	kinesin-like protein KIN-4C isoform X1 [Cucumis sativus]	GO:0005871,GO:0005874,GO:0009506,GO:0005524,GO:0016887,GO:0008017,GO:0003777,GO:0071555,GO:0007018,GO:0007052	kinesin complex|microtubule|plasmodesma|ATP binding|ATPase activity|microtubule binding|microtubule motor activity|cell wall organization|microtubule-based movement|mitotic spindle organization
Csa4G219350	68.2271	0.305151	4.24405	2.4539	1.29508	2.2e-05	0.000252902	Up	0.70658	0.821123	1.46932	2.14106	2.43249	3.21769	F14P13.9	hypothetical protein Csa_018877 [Cucumis sativus]	GO:0005871,GO:0005874,GO:0005524,GO:0016887,GO:0008017,GO:0003777,GO:0007018	kinesin complex|microtubule|ATP binding|ATPase activity|microtubule binding|microtubule motor activity|microtubule-based movement
Csa5G180920	100.75	0.228194	5.68616	2.4581	1.29755	1.3e-08	3.53e-07	Up	3.20016	4.11582	4.84633	10.6673	10.915	10.1379	F3G5.22	zinc finger protein ZAT12 [Cucumis sativus]	GO:0005634,GO:0003700,GO:0046872,GO:0003676,GO:0071289,GO:2000280,GO:0006355,GO:0010200	nucleus|DNA-binding transcription factor activity|metal ion binding|nucleic acid binding|cellular response to nickel ion|regulation of root development|regulation of transcription, DNA-templated|response to chitin
Csa2G171960	22.0116	0.507053	2.56715	2.46516	1.30168	0.0102538	0.0433383	Up	0.294101	0.927979	1.03968	1.7437	2.71431	1.38658	PAS_chr4_0465	uncharacterized protein LOC105434591 [Cucumis sativus]	GO:0016021,GO:0008168,GO:0008610,GO:0006665	integral component of membrane|methyltransferase activity|lipid biosynthetic process|sphingolipid metabolic process
Csa6G495120	77.5186	0.291823	4.46531	2.46755	1.30308	8e-06	0.000105848	Up	0.455535	0.386497	0.57277	0.866345	1.20586	1.64594		uncharacterized protein LOC101213278 [Cucumis sativus]
Csa4G051430	782.297	0.168262	7.7472	2.46837	1.30356	9.39e-15	7.14e-13	Up	8.40874	14.8509	12.8653	26.2766	29.4978	38.6062	F9D16.270	high mobility group B protein 6 [Cucumis sativus]	GO:0005634,GO:0003677,GO:0003700	nucleus|DNA binding|DNA-binding transcription factor activity
Csa6G428000	413.037	0.188229	6.94097	2.47339	1.30649	3.89e-12	2.06e-10	Up	4.08043	7.85396	8.10739	15.656	16.3361	20.3936		G2/mitotic-specific cyclin S13-7 [Cucumis sativus]	GO:0000307,GO:0005737,GO:0005634,GO:0016538,GO:0019901,GO:0051301,GO:0000278,GO:0045787,GO:0008284,GO:0006468,GO:0000079,GO:0007088	cyclin-dependent protein kinase holoenzyme complex|cytoplasm|nucleus|cyclin-dependent protein serine/threonine kinase regulator activity|protein kinase binding|cell division|mitotic cell cycle|positive regulation of cell cycle|positive regulation of cell proliferation|protein phosphorylation|regulation of cyclin-dependent protein serine/threonine kinase activity|regulation of mitotic nuclear divi…
Csa3G127250	56.8175	0.307796	4.24784	2.47507	1.30747	2.16e-05	0.000249293	Up	0.830588	0.943075	0.680407	1.67237	2.16806	2.64297	YCL16C	sister chromatid cohesion protein DCC1 [Cucumis sativus]	GO:0000785,GO:0000775,GO:0031390,GO:0005654,GO:0006260,GO:0035753,GO:0034088,GO:0007064,GO:0006275	chromatin|chromosome, centromeric region|Ctf18 RFC-like complex|nucleoplasm|DNA replication|maintenance of DNA trinucleotide repeats|maintenance of mitotic sister chromatid cohesion|mitotic sister chromatid cohesion|regulation of DNA replication
Csa3G126810	316.281	0.151248	8.65031	2.47657	1.30834	5.14e-18	5.85e-16	Up	4.20669	4.48921	5.81335	12.6556	12.1223	13.4369	PECS-2.1	pectinesterase 2 [Cucumis sativus]	GO:0005618,GO:0005576,GO:0045330,GO:0004857,GO:0030599,GO:0042545,GO:0045490	cell wall|extracellular region|aspartyl esterase activity|enzyme inhibitor activity|pectinesterase activity|cell wall modification|pectin catabolic process	csv00040	Pentose and glucuronate interconversions
Csa6G483230	1616.57	0.47722	2.74506	2.47941	1.31	0.00604998	0.0283646	Up	103.876	64.0757	55.6972	225.538	261.201	109.381		hypothetical protein E6C27_scaffold529G00200 [Cucumis melo var. makuwa]
Csa7G050780	75.5889	0.274318	4.77729	2.48027	1.31049	1.78e-06	2.83e-05	Up	0.895878	1.23136	1.41133	2.49761	3.00662	3.81066	F23N11.4	mitotic checkpoint serine/threonine-protein kinase BUB1 [Cucumis sativus]	GO:0000778,GO:0005524,GO:0004672,GO:0004674,GO:0051301,GO:0051754,GO:0007094	condensed nuclear chromosome kinetochore|ATP binding|protein kinase activity|protein serine/threonine kinase activity|cell division|meiotic sister chromatid cohesion, centromeric|mitotic spindle assembly checkpoint
Csa6G150540	478.726	0.169029	7.75422	2.4806	1.31069	8.89e-15	6.84e-13	Up	13.5225	14.0051	12.3909	25.9058	39.2561	40.289	HD2A	histone deacetylase HDT1 isoform X1 [Cucumis sativus]	GO:0005730,GO:0016787,GO:0046872,GO:0003676,GO:0006325,GO:0045892,GO:0010162	nucleolus|hydrolase activity|metal ion binding|nucleic acid binding|chromatin organization|negative regulation of transcription, DNA-templated|seed dormancy process
Csa4G192160	125.146	0.227872	5.75718	2.48269	1.3119	8.55e-09	2.43e-07	Up	1.26434	1.93451	1.49591	3.29797	4.20257	4.88177	F20D21.21	protein SINE1 [Cucumis sativus]	GO:0005737,GO:0016021,GO:0005635,GO:0031965,GO:0005634,GO:0032797,GO:0003779,GO:0000387	cytoplasm|integral component of membrane|nuclear envelope|nuclear membrane|nucleus|SMN complex|actin binding|spliceosomal snRNP assembly
Csa6G366250	263.067	0.218263	6.01533	2.48444	1.31292	1.8e-09	6.09e-08	Up	3.52131	5.27495	6.58319	9.51811	16.1452	14.657	UGT74AC1	UDP-glycosyltransferase 74E2 [Cucumis sativus]
Csa1G153560	76.6858	0.33527	3.92955	2.49227	1.31746	8.51e-05	0.000814106	Up	0.690718	1.63457	2.26222	3.10671	3.39987	5.55081		hypothetical protein Csa_022842 [Cucumis sativus]
Csa6G459990	306.068	0.518292	2.54648	2.49635	1.31982	0.0108815	0.0453162	Up	21.5407	27.5048	32.3865	38.1776	119.186	56.2909	CEY00_Acc20523	cysteine proteinase inhibitor 1-like [Cucumis sativus]
Csa2G354040	160.561	0.253152	5.21668	2.49773	1.32062	1.82e-07	3.8e-06	Up	0.860455	2.23843	1.97965	3.79904	4.09267	5.49266	T30E16.9	kinesin-like protein KIN-7N [Cucumis sativus]	GO:0005871,GO:0005874,GO:0005524,GO:0016887,GO:0008017,GO:0003777,GO:0007018	kinesin complex|microtubule|ATP binding|ATPase activity|microtubule binding|microtubule motor activity|microtubule-based movement
Csa2G416140	108.369	0.224072	5.90665	2.50275	1.32351	3.49e-09	1.1e-07	Up	1.0306	1.51349	1.52753	3.31741	3.62023	3.87675	T26B15	condensin complex subunit 2 [Cucumis sativus]	GO:0000793,GO:0005737,GO:0000799,GO:0003682,GO:0072587,GO:0044547,GO:0051301,GO:0007076	condensed chromosome|cytoplasm|nuclear condensin complex|chromatin binding|DNA topoisomerase (ATP-hydrolyzing) activator activity|DNA topoisomerase binding|cell division|mitotic chromosome condensation
Csa6G525390	26.9833	0.456012	2.90946	2.50837	1.32675	0.00362058	0.0189252	Up	1.58898	2.79782	0.826059	3.71267	5.47025	4.74294		hypothetical protein Csa_002799 [Cucumis sativus]
Csa2G022260	269.467	0.19528	6.80628	2.51251	1.32913	1e-11	4.96e-10	Up	1.66665	3.21827	3.14085	6.24689	7.0678	7.99901	F15A18	kinesin-like protein KIN-14S [Cucumis sativus]	GO:0005871,GO:0005874,GO:0005524,GO:0016887,GO:0008017,GO:0003777,GO:0007018	kinesin complex|microtubule|ATP binding|ATPase activity|microtubule binding|microtubule motor activity|microtubule-based movement
Csa6G365140	30.0784	0.436756	3.04528	2.51411	1.33004	0.00232465	0.0131702	Up	1.26632	2.38375	2.27419	3.05964	5.43034	7.27772	AFUB_029870	DNA polymerase epsilon subunit C [Cucumis sativus]
Csa6G487640	54.3516	0.334654	4.00603	2.53263	1.34063	6.17e-05	0.000617529	Up	0.901911	1.77863	0.937751	2.44519	3.29738	3.99166	C7A10.550	geranylgeranyl pyrophosphate synthase 7, chloroplastic [Cucumis sativus]	GO:0009507,GO:0005829,GO:0009513,GO:0009536,GO:0004161,GO:0004311,GO:0004337,GO:0046872,GO:0016117,GO:0009793,GO:0045337,GO:0033384,GO:0033386,GO:0008299,GO:0043693	chloroplast|cytosol|etioplast|plastid|dimethylallyltranstransferase activity|farnesyltranstransferase activity|geranyltranstransferase activity|metal ion binding|carotenoid biosynthetic process|embryo development ending in seed dormancy|farnesyl diphosphate biosynthetic process|geranyl diphosphate biosynthetic process|geranylgeranyl diphosphate biosynthetic process|isoprenoid biosynthetic process…	csv00900	Terpenoid backbone biosynthesis
Csa1G181530	26.2348	0.43284	3.11748	2.54801	1.34937	0.00182405	0.0107659	Up	1.439	1.79727	0.997452	4.90327	3.2464	3.39216		uncharacterized protein LOC105434476 [Cucumis sativus]
Csa1G181410	144.077	0.202051	6.72288	2.56394	1.35836	1.78e-11	8.53e-10	Up	2.48343	2.84175	2.07207	6.76969	5.97366	7.5231		uncharacterized protein LOC101217191 [Cucumis sativus]
Csa5G590120	22.7578	0.461212	2.94617	2.56474	1.35881	0.00321733	0.0171522	Up	0.150063	0.236747	0.187231	0.383496	0.630924	0.546696	F28L5.4	ATP-dependent DNA helicase Q-like 5 [Cucumis sativus]	GO:0005694,GO:0000781,GO:0005737,GO:0005634,GO:0036310,GO:0005524,GO:0043140,GO:0000405,GO:0003677,GO:0009378,GO:0032357,GO:0003697,GO:0061821,GO:0006284,GO:0042631,GO:0032508,GO:0006310,GO:0006281,GO:0006260,GO:0000724,GO:0008284,GO:0045740,GO:0010971,GO:0061820	chromosome|chromosome, telomeric region|cytoplasm|nucleus|annealing helicase activity|ATP binding|ATP-dependent 3'-5' DNA helicase activity|bubble DNA binding|DNA binding|four-way junction helicase activity|oxidized purine DNA binding|single-stranded DNA binding|telomeric D-loop binding|base-excision repair|cellular response to water deprivation|DNA duplex unwinding|DNA recombination|DNA repair|D…
Csa4G152290	306.038	0.177702	7.65826	2.56843	1.36089	1.88e-14	1.39e-12	Up	5.4897	5.04319	6.94868	13.2451	15.1402	19.437	T24P15.17	hypothetical protein Csa_015343 [Cucumis sativus]	GO:0005634,GO:0051301,GO:0006952,GO:0042023,GO:0009960,GO:0009561,GO:1904667,GO:1900426,GO:0051783,GO:0010224,GO:0010091	nucleus|cell division|defense response|DNA endoreduplication|endosperm development|megagametogenesis|negative regulation of ubiquitin protein ligase activity|positive regulation of defense response to bacterium|regulation of nuclear division|response to UV-B|trichome branching
Csa5G177140	137.689	0.221764	6.13664	2.56843	1.36089	8.43e-10	3.05e-08	Up	1.40638	1.1317	1.17653	4.03199	3.5143	2.65013	F12L6.2	probable receptor-like protein kinase At2g39360 [Cucumis sativus]
Csa3G462680	65.5529	0.349029	3.91593	2.57893	1.36677	9.01e-05	0.000852637	Up	2.63947	1.7745	2.12064	9.32084	5.35184	3.4067		uncharacterized protein LOC105434903 [Cucumis sativus]
Csa6G420530	54.5135	0.302156	4.5235	2.57899	1.3668	6.08e-06	8.28e-05	Up	2.29534	1.82523	2.61751	6.88771	6.07429	5.55364	F9D24.10	PLASMODESMATA CALLOSE-BINDING PROTEIN 5 [Cucumis sativus]	GO:0031225,GO:0046658,GO:0009506,GO:0001872,GO:0030247	anchored component of membrane|anchored component of plasma membrane|plasmodesma|(1->3)-beta-D-glucan binding|polysaccharide binding
Csa6G012260	46.6147	0.336192	4.06832	2.58066	1.36774	4.74e-05	0.000491928	Up	3.27007	2.99408	2.79287	6.6855	7.42524	10.8871		hypothetical protein Csa_005162 [Cucumis sativus]
Csa3G062600	553.938	0.173794	7.90669	2.59212	1.37413	2.64e-15	2.21e-13	Up	2.59428	4.35118	4.86585	9.15181	10.9674	12.2365	MAL21.18	kinesin-like protein KIN-12F [Cucumis sativus]	GO:0005871,GO:0005874,GO:0005524,GO:0008574,GO:0016887,GO:0008017,GO:0003777,GO:0007018	kinesin complex|microtubule|ATP binding|ATP-dependent microtubule motor activity, plus-end-directed|ATPase activity|microtubule binding|microtubule motor activity|microtubule-based movement
Csa4G154320	1400.37	0.166241	8.33261	2.61212	1.38522	7.91e-17	8.04e-15	Up	21.008	24.5122	28.4288	47.6354	72.4626	84.8225	MOJ9_3	hypothetical protein Csa_015257 [Cucumis sativus]	GO:0005618,GO:0005576,GO:0005794,GO:0016020,GO:0009505,GO:0009506,GO:0090353	cell wall|extracellular region|Golgi apparatus|membrane|plant-type cell wall|plasmodesma|polygalacturonase inhibitor activity
Csa7G064050	757.31	0.171424	8.14788	2.63307	1.39675	3.7e-16	3.43e-14	Up	15.3163	25.6266	26.0236	52.6436	56.1485	77.8828
Csa2G348180	27.5302	0.427322	3.28576	2.64648	1.40408	0.00101709	0.00664007	Up	0.159806	0.29764	0.350775	0.943848	0.619085	0.703958	T1B8.1	pentatricopeptide repeat-containing protein At2g33680 [Cucumis sativus]
Csa1G046890	251.657	0.163649	8.63987	2.66457	1.41391	5.63e-18	6.29e-16	Up	3.20425	3.49342	4.00873	8.97425	10.5788	10.7746	F22K18.90	pachytene checkpoint protein 2 homolog [Cucumis sativus]	GO:0005694,GO:0005634,GO:0005524,GO:0051598,GO:0007131,GO:0007129	chromosome|nucleus|ATP binding|meiotic recombination checkpoint|reciprocal meiotic recombination|synapsis
Csa6G290840	36.4432	0.377167	3.75198	2.66682	1.41512	0.000175446	0.00151403	Up	0.428462	0.617466	0.925244	1.54979	1.96027	2.04829		uncharacterized protein LOC101214584 [Cucumis sativus]
Csa7G237880	70.7037	0.287443	4.94147	2.67658	1.42039	7.75e-07	1.35e-05	Up	2.00156	2.34366	2.86151	4.98725	7.69698	7.77448		uncharacterized protein LOC101213346 [Cucumis sativus]
Csa6G298490	147.503	0.196544	7.23154	2.6783	1.42132	4.78e-13	2.9e-11	Up	0.876364	1.06164	1.06739	2.58515	2.74739	3.23294		uncharacterized protein LOC105435834 isoform X1 [Cucumis sativus]
Csa1G065980	543.073	0.187106	7.60644	2.68181	1.42321	2.82e-14	2.04e-12	Up	3.30658	5.82213	5.85859	10.8818	14.3243	17.2632	F7J7.210	kinesin-like protein KIN-14C [Cucumis sativus]	GO:0000777,GO:0005737,GO:0005871,GO:0005874,GO:0005872,GO:0005634,GO:0009524,GO:0005819,GO:0005524,GO:0008569,GO:0016887,GO:0008017,GO:0003777,GO:0009971,GO:0051301,GO:0007018,GO:0051225	condensed chromosome kinetochore|cytoplasm|kinesin complex|microtubule|minus-end kinesin complex|nucleus|phragmoplast|spindle|ATP binding|ATP-dependent microtubule motor activity, minus-end-directed|ATPase activity|microtubule binding|microtubule motor activity|anastral spindle assembly involved in male meiosis|cell division|microtubule-based movement|spindle assembly
Csa3G734270	95.8268	0.256611	5.55515	2.6861	1.42551	2.77e-08	6.99e-07	Up	1.44179	2.31432	1.46422	4.28441	4.50428	6.14361		uncharacterized protein LOC101205491 [Cucumis sativus]
Csa3G777560	323.599	0.172526	8.32993	2.70782	1.43713	8.09e-17	8.18e-15	Up	1.72481	2.81167	2.76233	6.39852	6.4045	8.15268	TKRP125	kinesin-like protein KIN-5C [Cucumis sativus]	GO:0005737,GO:0005874,GO:0005819,GO:0005524,GO:0008017,GO:0003777,GO:0007018	cytoplasm|microtubule|spindle|ATP binding|microtubule binding|microtubule motor activity|microtubule-based movement
Csa3G126820	74.9009	0.284704	5.0549	2.71161	1.43915	4.31e-07	8.15e-06	Up	0.925517	1.41609	1.5264	2.74039	4.15633	4.20616	HP1-L	hypothetical protein Csa_009693 [Cucumis sativus]	GO:0005634,GO:0006325	nucleus|chromatin organization
Csa1G015060	92.5674	0.236212	6.095	2.71267	1.43971	1.09e-09	3.87e-08	Up	0.721646	0.844984	0.672164	2.02864	2.08131	2.36807	SPAPB1E7.02c	WD repeat and HMG-box DNA-binding protein 1 [Cucumis sativus]	GO:0000775,GO:0000790,GO:0043596,GO:0005654,GO:0005634,GO:0031298,GO:0003682,GO:0006974,GO:0061641,GO:0030702,GO:0006281,GO:0006261,GO:0000278,GO:1903461	chromosome, centromeric region|nuclear chromatin|nuclear replication fork|nucleoplasm|nucleus|replication fork protection complex|chromatin binding|cellular response to DNA damage stimulus|CENP-A containing chromatin organization|chromatin silencing at centromere|DNA repair|DNA-dependent DNA replication|mitotic cell cycle|Okazaki fragment processing involved in mitotic DNA replication
Csa7G395770	40.4619	0.393413	3.68195	2.72929	1.44853	0.000231455	0.00191479	Up	0.286266	0.875028	0.714339	1.46314	1.49713	2.45388	F22D16.3	wee1-like protein kinase isoform X2 [Cucumis sativus]	GO:0005634,GO:0005524,GO:0046872,GO:0004715,GO:0004672,GO:0004713,GO:0007050,GO:0051301,GO:0000076,GO:0007093	nucleus|ATP binding|metal ion binding|non-membrane spanning protein tyrosine kinase activity|protein kinase activity|protein tyrosine kinase activity|cell cycle arrest|cell division|DNA replication checkpoint|mitotic cell cycle checkpoint
Csa5G647410	49.9429	0.326448	4.4378	2.72965	1.44871	9.09e-06	0.000118258	Up	0.879595	0.650482	0.657332	1.6859	2.25498	2.44459	SPAC6B12.10c	DNA primase small subunit [Cucumis sativus]	GO:0005658,GO:0005737,GO:0000790,GO:0005634,GO:0003896,GO:0046872,GO:0003697,GO:0006269,GO:1902981	alpha DNA polymerase:primase complex|cytoplasm|nuclear chromatin|nucleus|DNA primase activity|metal ion binding|single-stranded DNA binding|DNA replication, synthesis of RNA primer|synthesis of RNA primer involved in mitotic DNA replication	csv03030	DNA replication
Csa6G516780	93.1066	0.232386	6.23507	2.73007	1.44894	4.52e-10	1.69e-08	Up	5.24406	5.48106	4.90721	16.2963	14.5195	14.7219	MSA6.19	putative zinc finger protein [Cucumis melo var. makuwa]	GO:0005737,GO:0005634,GO:0003700,GO:0008270,GO:0009785,GO:0045892,GO:0009640,GO:0010017,GO:0009909,GO:0006355,GO:0010200	cytoplasm|nucleus|DNA-binding transcription factor activity|zinc ion binding|blue light signaling pathway|negative regulation of transcription, DNA-templated|photomorphogenesis|red or far-red light signaling pathway|regulation of flower development|regulation of transcription, DNA-templated|response to chitin
Csa7G262900	32.6713	0.381043	3.80487	2.73174	1.44982	0.000141878	0.00125981	Up	0.899294	1.04321	0.825026	3.19045	2.38685	2.49402		organ-specific protein S2-like [Cucumis sativus]
Csa4G664480	516.403	0.177806	8.17299	2.73816	1.45321	3.01e-16	2.82e-14	Up	6.67269	10.9072	12.0949	24.1471	26.9313	34.908	F9H16.8	cyclin-dependent kinase B2-2 [Cucumis sativus]	GO:0005634,GO:0005524,GO:0004693,GO:0004674,GO:0008353,GO:0009755,GO:0046777,GO:0006468,GO:0010389,GO:0009934,GO:0007346	nucleus|ATP binding|cyclin-dependent protein serine/threonine kinase activity|protein serine/threonine kinase activity|RNA polymerase II CTD heptapeptide repeat kinase activity|hormone-mediated signaling pathway|protein autophosphorylation|protein phosphorylation|regulation of G2/M transition of mitotic cell cycle|regulation of meristem structural organization|regulation of mitotic cell cycle
Csa3G002800	23.9111	0.456555	3.18499	2.7399	1.45412	0.00144757	0.00890898	Up	0.407732	0.53605	0.353279	1.04199	1.04529	1.71114	AN3	naringenin,2-oxoglutarate 3-dioxygenase [Cucumis sativus]	GO:0031418,GO:0046872,GO:0045486,GO:0009813	L-ascorbic acid binding|metal ion binding|naringenin 3-dioxygenase activity|flavonoid biosynthetic process	csv00941	Flavonoid biosynthesis
Csa4G295440	19205.8	0.0748119	19.4482	2.74148	1.45496	3.02e-84	3.38e-81	Up	190.983	210.403	207.084	606.251	583.003	587.556	HSC-2	hypothetical protein Csa_017889 [Cucumis sativus]	GO:0005737,GO:0005524,GO:0016887,GO:0042623,GO:0031072,GO:0051787,GO:0044183,GO:0051082,GO:0034605,GO:0034620,GO:0051085,GO:0042026,GO:0006986	cytoplasm|ATP binding|ATPase activity|ATPase activity, coupled|heat shock protein binding|misfolded protein binding|protein binding involved in protein folding|unfolded protein binding|cellular response to heat|cellular response to unfolded protein|chaperone cofactor-dependent protein refolding|protein refolding|response to unfolded protein	csv03040,csv04141,csv04144	Spliceosome|Protein processing in endoplasmic reticulum|Endocytosis
Csa1G015820	119.547	0.241148	6.03899	2.74401	1.45629	1.55e-09	5.35e-08	Up	0.767464	1.20092	1.23164	2.4559	2.95983	3.89718	F25I16.11	kinesin-like protein KIN-8A [Cucumis sativus]	GO:0005871,GO:0005874,GO:0061673,GO:1990023,GO:0005634,GO:0005524,GO:0008574,GO:0016887,GO:0008017,GO:0003777,GO:0007019,GO:0007018,GO:0000070	kinesin complex|microtubule|mitotic spindle astral microtubule|mitotic spindle midzone|nucleus|ATP binding|ATP-dependent microtubule motor activity, plus-end-directed|ATPase activity|microtubule binding|microtubule motor activity|microtubule depolymerization|microtubule-based movement|mitotic sister chromatid segregation
Csa3G690290	1410.39	0.15523	9.38828	2.74602	1.45734	6.1e-21	9.28e-19	Up	5.4318	9.43132	8.49827	19.6815	21.1178	27.091	F14O13.7	DNA topoisomerase 2 [Cucumis sativus]	GO:0005634,GO:0005524,GO:0003677,GO:0003916,GO:0003918,GO:0046872,GO:0006265,GO:0044774,GO:0000712,GO:0000819	nucleus|ATP binding|DNA binding|DNA topoisomerase activity|DNA topoisomerase type II (ATP-hydrolyzing) activity|metal ion binding|DNA topological change|mitotic DNA integrity checkpoint|resolution of meiotic recombination intermediates|sister chromatid segregation
Csa6G446280	55.034	0.303227	4.81811	2.75295	1.46098	1.45e-06	2.37e-05	Up	2.51486	2.63972	1.94001	8.12693	6.15608	6.60633	PALG2B	phenylalanine ammonia-lyase [Cucumis sativus]	GO:0005737,GO:0045548,GO:0009800,GO:0006559	cytoplasm|phenylalanine ammonia-lyase activity|cinnamic acid biosynthetic process|L-phenylalanine catabolic process	csv00360,csv00940	Phenylalanine metabolism|Phenylpropanoid biosynthesis
Csa7G064070	26.7765	0.458517	3.18964	2.75586	1.4625	0.00142452	0.00879843	Up	1.25298	0.726752	1.1495	4.36989	1.81395	3.08002		classical arabinogalactan protein 10 [Cucumis sativus]
CsaUNG031630	65.5871	0.298493	4.90223	2.75735	1.46328	9.48e-07	1.62e-05	Up	1.46985	1.10606	1.44782	3.24228	4.99781	3.56436	T11H3.120	CBL-interacting serine/threonine-protein kinase 25 [Cucumis sativus]	GO:0005524,GO:0004674,GO:0050832,GO:0007165	ATP binding|protein serine/threonine kinase activity|defense response to fungus|signal transduction
Csa1G073890	51.804	0.308998	4.74118	2.76067	1.46502	2.12e-06	3.32e-05	Up	0.579676	0.88335	0.712295	2.07396	1.91841	2.3998	T32N4.9	L-type lectin-domain containing receptor kinase VII.1 [Cucumis sativus]
Csa4G001970	165.546	0.194895	7.55005	2.77303	1.47146	4.35e-14	3.07e-12	Up	3.60314	3.88889	5.31573	13.389	11.0347	13.3562	T30B22.18	ethylene-responsive transcription factor ERF073 [Cucumis sativus]	GO:0005634,GO:0003677,GO:0003700,GO:0009873,GO:2000280,GO:0034059	nucleus|DNA binding|DNA-binding transcription factor activity|ethylene-activated signaling pathway|regulation of root development|response to anoxia
Csa4G064090	324.984	0.183739	8.01068	2.77382	1.47188	1.14e-15	1.01e-13	Up	1.67956	2.38635	2.77759	6.17812	5.57384	8.40314	T9N14.6	kinesin-like protein KIN-14Q isoform X1 [Cucumis sativus]	GO:0005871,GO:0005874,GO:0005524,GO:0016887,GO:0008017,GO:0003777,GO:0007018	kinesin complex|microtubule|ATP binding|ATPase activity|microtubule binding|microtubule motor activity|microtubule-based movement
Csa2G326470	98.4726	0.253654	5.80944	2.77712	1.47359	6.27e-09	1.85e-07	Up	1.09137	1.5266	1.34585	3.06149	3.64378	5.00398	T19N18.50	SHUGOSHIN 2 isoform X1 [Cucumis sativus]	GO:0000775,GO:0005634,GO:0034090	chromosome, centromeric region|nucleus|maintenance of meiotic sister chromatid cohesion
Csa3G386830	14.5671	0.567165	2.59849	2.77747	1.47377	0.00936352	0.0402737	Up	0.376267	0.618352	0.456422	1.85905	1.15754	1.27671	F16D14.2	transcription factor MYB4 [Cucumis sativus]	GO:0005634,GO:0003700,GO:0043565,GO:0044212,GO:0030154,GO:0045893,GO:0009733,GO:0009409,GO:0009723,GO:0050826,GO:0009753,GO:0009751,GO:0009651	nucleus|DNA-binding transcription factor activity|sequence-specific DNA binding|transcription regulatory region DNA binding|cell differentiation|positive regulation of transcription, DNA-templated|response to auxin|response to cold|response to ethylene|response to freezing|response to jasmonic acid|response to salicylic acid|response to salt stress
Csa6G239680	346.751	0.215088	6.85776	2.77988	1.47502	6.99e-12	3.6e-10	Up	8.93962	11.1259	9.86162	17.7194	34.6567	35.8623	KLLA0D17864g	hypothetical protein CSA_017393 [Cucumis sativus]	GO:0005739	mitochondrion
Csa7G407650	209.972	0.188941	7.83215	2.78913	1.47981	4.8e-15	3.9e-13	Up	1.76237	2.22886	2.37017	5.13048	6.24679	7.47145	OsI_38725	DNA replication licensing factor MCM7 [Cucumis sativus]	GO:0005737,GO:0042555,GO:0000347,GO:0005524,GO:0003677,GO:0003678,GO:0007049,GO:0006270	cytoplasm|MCM complex|THO complex|ATP binding|DNA binding|DNA helicase activity|cell cycle|DNA replication initiation	csv03030	DNA replication
Csa3G002810	510.024	0.344234	4.30859	2.79561	1.48316	1.64e-05	0.00019744	Up	5.52876	11.667	11.3871	22.3906	27.3005	34.5258		uncharacterized protein LOC101215376 [Cucumis sativus]
Csa3G181940	371.767	0.136219	10.9014	2.79915	1.48499	1.13e-27	2.48e-25	Up	5.99585	7.28701	7.14023	19.8128	20.8764	20.0955	MTG10.4	heat stress transcription factor B-2b [Cucumis sativus]	GO:0005634,GO:0003700,GO:0000978,GO:0043565,GO:0034605,GO:0061408,GO:0010200	nucleus|DNA-binding transcription factor activity|RNA polymerase II proximal promoter sequence-specific DNA binding|sequence-specific DNA binding|cellular response to heat|positive regulation of transcription from RNA polymerase II promoter in response to heat stress|response to chitin
Csa2G258720	37.2036	0.380708	3.9037	2.80145	1.48617	9.47e-05	0.000888477	Up	1.76891	1.66115	1.48888	6.71629	4.4917	3.52002	MRG7.3	auxin-responsive protein SAUR24-like [Cucumis sativus]	GO:0005886,GO:0009734,GO:0007275,GO:0040008	plasma membrane|auxin-activated signaling pathway|multicellular organism development|regulation of growth
Csa6G108560	32.7588	0.381421	3.89855	2.80303	1.48699	9.68e-05	0.00090583	Up	0.647548	0.638503	0.942592	2.33886	1.99211	2.31284	T14P1.11	cyclin-U2-1 [Cucumis sativus]	GO:0019901,GO:0007049,GO:0051301,GO:0000079	protein kinase binding|cell cycle|cell division|regulation of cyclin-dependent protein serine/threonine kinase activity
Csa4G297420	18.0914	0.510697	2.92958	2.82085	1.49613	0.00339418	0.017974	Up	0.535602	0.432099	0.405008	1.64252	1.04855	1.46084		uncharacterized protein LOC101223041 [Cucumis sativus]
Csa5G603340	225.738	0.18887	7.95682	2.83393	1.5028	1.77e-15	1.53e-13	Up	4.9014	6.69563	6.4233	14.5613	17.8535	21.8281	T10O24.14	protein PLASTID REDOX INSENSITIVE 2, chloroplastic [Cucumis sativus]	GO:0042644,GO:0042646,GO:0000427,GO:0003677,GO:0010468,GO:0009642	chloroplast nucleoid|plastid nucleoid|plastid-encoded plastid RNA polymerase complex|DNA binding|regulation of gene expression|response to light intensity
Csa1G025250	249.256	0.196425	7.65958	2.83732	1.50453	1.87e-14	1.38e-12	Up	0.968105	1.62713	1.70432	3.82355	3.82437	5.28095	F26G5	kinesin-like protein KIN-12E [Cucumis sativus]	GO:0005871,GO:0005874,GO:0005524,GO:0016887,GO:0008017,GO:0003777,GO:0007018	kinesin complex|microtubule|ATP binding|ATPase activity|microtubule binding|microtubule motor activity|microtubule-based movement
Csa6G382990	60.4807	0.318422	4.72814	2.83932	1.50555	2.27e-06	3.52e-05	Up	0.323272	0.595936	0.409187	0.94827	1.51339	1.53615	OsJ_14878	kinesin-like protein KIN-7C, mitochondrial isoform X1 [Cucumis sativus]	GO:0009507,GO:0005871,GO:0005874,GO:0005524,GO:0016887,GO:0008017,GO:0003777,GO:0007018	chloroplast|kinesin complex|microtubule|ATP binding|ATPase activity|microtubule binding|microtubule motor activity|microtubule-based movement
Csa5G162010	181.977	0.220963	6.8164	2.84056	1.50617	9.33e-12	4.66e-10	Up	2.86096	4.3927	4.37699	8.56477	11.7772	14.6708	MNJ7.9	probable pectinesterase 68 [Cucumis sativus]	GO:0005618,GO:0005576,GO:0045330,GO:0030599,GO:0042545,GO:0045490	cell wall|extracellular region|aspartyl esterase activity|pectinesterase activity|cell wall modification|pectin catabolic process
Csa4G648530	120.724	0.247856	6.0814	2.8428	1.50731	1.19e-09	4.19e-08	Up	1.66619	1.67334	2.47027	6.18206	7.05594	4.26495		vitellogenin-2 [Cucumis sativus]
Csa3G576330	291.543	0.186072	8.17571	2.87044	1.52127	2.94e-16	2.78e-14	Up	2.7815	3.36403	3.66022	7.37487	10.9636	11.5257	At4g28590	thioredoxin-like fold domain-containing protein MRL7, chloroplastic isoform X1 [Cucumis sativus]	GO:0042644,GO:0009570,GO:0009658,GO:0006355	chloroplast nucleoid|chloroplast stroma|chloroplast organization|regulation of transcription, DNA-templated
Csa4G652740	201.982	0.175123	8.69145	2.87203	1.52207	3.58e-18	4.1e-16	Up	9.26046	9.21891	9.25812	28.2168	30.9541	25.6652		hypothetical protein Csa_012581 [Cucumis sativus]
Csa6G410010	45.8126	0.340458	4.47737	2.87658	1.52436	7.56e-06	0.000101173	Up	1.85707	1.76574	1.0344	4.54249	4.28481	5.54319	T9H9.5	preprotein translocase subunit SCY2, chloroplastic [Cucumis sativus]	GO:0033097,GO:0031969,GO:0009535,GO:0016021,GO:0009526,GO:0008320,GO:0005048,GO:0009658,GO:0072598,GO:0006616,GO:0010027	amyloplast membrane|chloroplast membrane|chloroplast thylakoid membrane|integral component of membrane|plastid envelope|protein transmembrane transporter activity|signal sequence binding|chloroplast organization|protein localization to chloroplast|SRP-dependent cotranslational protein targeting to membrane, translocation|thylakoid membrane organization
Csa1G462030	82.6739	0.264638	5.76245	2.87779	1.52496	8.29e-09	2.36e-07	Up	2.35435	2.03836	2.92554	6.80914	6.4185	9.22937	OSJNBa0088M05.8	membrane protein PM19L [Cucumis sativus]	GO:0016021	integral component of membrane
Csa3G645940	707.813	0.121821	12.5512	2.88586	1.529	3.92e-36	1.2e-33	Up	14.9761	16.4321	17.0036	44.9277	53.5005	50.1409	OsJ_11194	protein TIFY 10a [Cucumis sativus]	GO:0031347,GO:2000022,GO:0009611	regulation of defense response|regulation of jasmonic acid mediated signaling pathway|response to wounding	csv04075	Plant hormone signal transduction
Csa5G169060	196.825	0.210377	7.27217	2.88766	1.5299	3.54e-13	2.19e-11	Up	0.768027	1.43304	1.40053	3.20079	3.40478	4.40592	F14I3.15	serine/threonine-protein kinase TIO [Cucumis sativus]	GO:0005856,GO:0009524,GO:0005524,GO:0019894,GO:0004674,GO:0000911,GO:0009558,GO:0007112	cytoskeleton|phragmoplast|ATP binding|kinesin binding|protein serine/threonine kinase activity|cytokinesis by cell plate formation|embryo sac cellularization|male meiosis cytokinesis
Csa5G169090	302.927	0.21107	7.25658	2.89116	1.53165	3.97e-13	2.43e-11	Up	1.89205	3.28792	3.60335	6.64489	9.02877	11.1604	K17N15.15	65-kDa microtubule-associated protein 3 [Cucumis sativus]	GO:0055028,GO:0005874,GO:0005634,GO:0009524,GO:0009574,GO:0008017,GO:0000911,GO:0052096,GO:0000226,GO:0046785,GO:0000280,GO:0009624	cortical microtubule|microtubule|nucleus|phragmoplast|preprophase band|microtubule binding|cytokinesis by cell plate formation|formation by symbiont of syncytium involving giant cell for nutrient acquisition from host|microtubule cytoskeleton organization|microtubule polymerization|nuclear division|response to nematode
Csa1G596420	788.347	0.169581	9.0396	2.89376	1.53294	1.57e-19	2.05e-17	Up	12.1513	22.0779	17.5376	45.1253	48.3615	65.1464	ABP20	auxin-binding protein ABP19a [Cucumis sativus]	GO:0048046,GO:0005618,GO:0030145,GO:0045735,GO:0009734	apoplast|cell wall|manganese ion binding|nutrient reservoir activity|auxin-activated signaling pathway
Csa3G135120	151.871	0.200393	7.7171	2.92099	1.54646	1.19e-14	8.91e-13	Up	4.38961	5.28307	5.30234	17.5528	15.9534	13.0038	K14B15.15	ethylene-response factor C3 [Cucumis sativus]	GO:0005634,GO:0003677,GO:0003700,GO:0006952,GO:0009873,GO:0009867	nucleus|DNA binding|DNA-binding transcription factor activity|defense response|ethylene-activated signaling pathway|jasmonic acid mediated signaling pathway	csv04016,csv04075	MAPK signaling pathway - plant|Plant hormone signal transduction
Csa5G468480	43.587	0.355725	4.34822	2.92163	1.54677	1.37e-05	0.000169296	Up	0.786183	1.00776	0.817424	1.92878	2.66047	3.53808	F10D13.23	mitotic checkpoint protein BUB3.3 isoform X1 [Cucumis sativus]	GO:1990298,GO:0000777,GO:0080008,GO:0000776,GO:0033597,GO:0009524,GO:0005819,GO:0043130,GO:0051301,GO:0007059,GO:0051321,GO:0007094	bub1-bub3 complex|condensed chromosome kinetochore|Cul4-RING E3 ubiquitin ligase complex|kinetochore|mitotic checkpoint complex|phragmoplast|spindle|ubiquitin binding|cell division|chromosome segregation|meiotic cell cycle|mitotic spindle assembly checkpoint
Csa7G448770	70.0047	0.33021	4.68961	2.92524	1.54856	2.74e-06	4.16e-05	Up	0.500463	1.48042	1.01179	2.61478	2.4805	4.17082	OsJ_030157	zinc finger CCCH domain-containing protein 62 isoform X1 [Cucumis sativus]	GO:0003677,GO:0046872	DNA binding|metal ion binding
Csa5G471600	767.084	0.118288	13.1003	2.92737	1.5496	3.28e-39	1.11e-36	Up	5.54895	7.25633	7.00073	20.4237	21.5119	19.6318	F16A14.26	phosphate transporter PHO1 homolog 3 [Cucumis sativus]	GO:0005794,GO:0016021,GO:0005886,GO:0005802,GO:0015114,GO:0016036,GO:0055062,GO:0006817,GO:0055069	Golgi apparatus|integral component of membrane|plasma membrane|trans-Golgi network|phosphate ion transmembrane transporter activity|cellular response to phosphate starvation|phosphate ion homeostasis|phosphate ion transport|zinc ion homeostasis
Csa6G445000	72.024	0.353171	4.40368	2.93885	1.55525	1.06e-05	0.000135978	Up	1.3048	2.85907	3.84386	4.81653	8.77152	11.1848	S1FA	DNA-binding protein S1FA [Cucumis sativus]	GO:0005634,GO:0003677,GO:0006355	nucleus|DNA binding|regulation of transcription, DNA-templated
Csa3G797600	28.4371	0.518678	3.00428	2.94498	1.55826	0.00266206	0.0147313	Up	4.09314	5.80171	1.06395	5.49166	13.6414	15.3504	F21M12.8	60S ribosomal protein L21-1 [Cucumis sativus]	GO:0009507,GO:0022625,GO:0022626,GO:0005730,GO:0003735,GO:0006412	chloroplast|cytosolic large ribosomal subunit|cytosolic ribosome|nucleolus|structural constituent of ribosome|translation	csv03010	Ribosome
Csa6G363520	1685.42	0.107153	14.5508	2.94683	1.55916	5.77e-48	3.05e-45	Up	41.0377	54.4549	44.0869	152.905	145.051	139.459		uncharacterized protein LOC101208403 [Cucumis sativus]
Csa5G606890	18.2631	0.551742	2.84878	2.97274	1.57179	0.00438867	0.0220198	Up	1.02005	0.5029	1.2727	1.66835	3.24267	3.93475		hypothetical protein Csa_008139 [Cucumis sativus]
Csa2G423690	24.063	0.450722	3.48872	2.97409	1.57245	0.000485332	0.00360698	Up	1.68012	2.57702	2.52328	5.53407	7.84879	8.00116		hypothetical protein Csa_021836 [Cucumis sativus]			csv00860	Porphyrin metabolism
Csa3G355050	15.4482	0.547267	2.8737	2.97457	1.57268	0.00405692	0.0207217	Up	1.46516	1.26411	1.52338	5.24204	4.31959	3.92481		hypothetical protein Csa_011671 [Cucumis sativus]
Csa1G002940	52.1652	0.307583	5.11501	2.97583	1.57329	3.14e-07	6.12e-06	Up	1.74664	2.4268	2.06369	6.00566	6.7574	6.97573		uncharacterized protein LOC101222072 [Cucumis sativus]
Csa5G478610	44.5064	0.367152	4.28948	2.97914	1.57489	1.79e-05	0.000213058	Up	1.58007	4.98561	4.10716	9.85269	10.532	13.2058	OSCPNY1	beta-amyrin synthase isoform X2 [Cucumis sativus]	GO:0016866	intramolecular transferase activity
Csa3G732670	32.2543	0.381846	4.13348	2.98629	1.57835	3.57e-05	0.000385736	Up	0.404393	0.448588	0.367905	1.26598	1.29591	1.32701		uncharacterized protein LOC101221367 [Cucumis sativus]
Csa6G308430	18.293	0.514591	3.07628	2.99597	1.58302	0.00209601	0.0120896	Up	1.61168	1.05944	2.23429	5.30861	5.69268	4.60511
Csa2G369020	3293.73	0.13196	12.0396	3.00789	1.58875	2.2e-33	6.43e-31	Up	43.5849	63.8316	73.7876	189.681	199.491	187.552	PHI-1	protein PHOSPHATE-INDUCED 1 [Cucumis sativus]
Csa5G139790	56.1686	0.322794	4.93044	3.01366	1.59152	8.2e-07	1.42e-05	Up	0.23824	0.309096	0.508452	0.986961	1.31154	1.06141	B11E5.220	protein timeless homolog [Cucumis sativus]	GO:0000790,GO:0000228,GO:0005634,GO:0031298,GO:0003677,GO:0006281,GO:0000076,GO:0051321,GO:0043111,GO:0048478	nuclear chromatin|nuclear chromosome|nucleus|replication fork protection complex|DNA binding|DNA repair|DNA replication checkpoint|meiotic cell cycle|replication fork arrest|replication fork protection
Csa5G166470	217.908	0.191911	8.36304	3.04187	1.60496	6.11e-17	6.38e-15	Up	1.50718	2.43725	2.56999	6.65573	6.18222	8.1824	MRO11.5	hypothetical protein Csa_000085 [Cucumis sativus]	GO:0005871,GO:0005874,GO:0005524,GO:0016887,GO:0008017,GO:0003777,GO:0007018	kinesin complex|microtubule|ATP binding|ATPase activity|microtubule binding|microtubule motor activity|microtubule-based movement
Csa1G265120	647.696	0.131281	12.2759	3.05588	1.61159	1.22e-34	3.63e-32	Up	8.07379	10.6046	10.8297	28.6344	32.4223	34.6704		uncharacterized protein LOC101215379 [Cucumis sativus]
Csa7G048030	276.492	0.189105	8.52825	3.05831	1.61273	1.49e-17	1.61e-15	Up	4.91057	5.66967	6.54578	13.815	19.8412	21.9462		uncharacterized protein LOC101207471 [Cucumis sativus]
Csa6G292420	79.3816	0.272043	5.9306	3.05967	1.61338	3.02e-09	9.73e-08	Up	1.32192	1.57995	1.79095	4.79099	4.02567	6.48131		uncharacterized protein LOC101212258 [Cucumis sativus]
Csa7G390030	87.865	0.286106	5.66451	3.07513	1.62065	1.47e-08	3.96e-07	Up	1.37164	3.04308	1.93548	5.30805	6.93236	8.45087		uncharacterized protein LOC105436163 [Cucumis sativus]
Csa2G258830	42.578	0.376282	4.31759	3.08363	1.62463	1.58e-05	0.000190647	Up	0.901446	1.6161	2.64139	5.27758	6.7229	4.74171	MCM23.16	auxin-responsive protein SAUR21 [Cucumis sativus]	GO:0005886,GO:0009734,GO:0007275,GO:0040008	plasma membrane|auxin-activated signaling pathway|multicellular organism development|regulation of growth	csv04075	Plant hormone signal transduction
Csa3G855420	14.5445	0.581391	2.79868	3.08898	1.62713	0.00513117	0.0249294	Up	0.377409	0.28944	0.218003	0.771595	0.860042	1.30305	T30D6.3	protein LIKE COV 1 isoform X2 [Cucumis sativus]	GO:0005794,GO:0016021	Golgi apparatus|integral component of membrane
Csa2G375240	211.996	0.206721	7.89561	3.09983	1.63219	2.89e-15	2.41e-13	Up	1.08112	1.79151	1.79541	4.14433	4.88115	6.307	F15N18.100	transcription factor MYB3R-1 [Cucumis sativus]	GO:0005634,GO:0003700,GO:0043565,GO:0003713,GO:1901181,GO:0045893,GO:0032465,GO:0032875,GO:0006355,GO:0009620,GO:0009623,GO:0009751	nucleus|DNA-binding transcription factor activity|sequence-specific DNA binding|transcription coactivator activity|negative regulation of cellular response to caffeine|positive regulation of transcription, DNA-templated|regulation of cytokinesis|regulation of DNA endoreduplication|regulation of transcription, DNA-templated|response to fungus|response to parasitic fungus|response to salicylic acid
Csa1G648050	191.978	0.19639	8.33515	3.11005	1.63694	7.74e-17	7.95e-15	Up	1.37686	1.54707	1.5481	4.41879	4.17009	6.24435	T25N22.13	TORTIFOLIA1-like protein 2 isoform X2 [Cucumis sativus]	GO:0005874,GO:0008017	microtubule|microtubule binding
Csa2G371610	1060.9	0.113187	14.6672	3.16046	1.66014	1.05e-48	5.85e-46	Up	16.1763	18.6263	19.7151	62.4565	65.1443	55.519	F14M13.10	mitochondrial uncoupling protein 5 [Cucumis sativus]	GO:0016021,GO:0005743,GO:0015297,GO:0005310,GO:0015140,GO:0015131,GO:0017077,GO:0015141,GO:0015116,GO:0015117,GO:0071423,GO:0006839,GO:0015729,GO:0035435,GO:1902600,GO:0071422,GO:0008272,GO:0015709	integral component of membrane|mitochondrial inner membrane|antiporter activity|dicarboxylic acid transmembrane transporter activity|malate transmembrane transporter activity|oxaloacetate transmembrane transporter activity|oxidative phosphorylation uncoupler activity|succinate transmembrane transporter activity|sulfate transmembrane transporter activity|thiosulfate transmembrane transporter activ…
Csa2G035460	37.1274	0.427246	3.90804	3.18148	1.6697	9.3e-05	0.000876128	Up	0.459658	0.764838	0.298702	0.969117	2.15059	2.03167	OJ1695_H09.4	leucine aminopeptidase 1 [Cucumis sativus]	GO:0009507,GO:0004177,GO:0030145,GO:0008235	chloroplast|aminopeptidase activity|manganese ion binding|metalloexopeptidase activity	csv00480	Glutathione metabolism
Csa3G009550	31.278	0.398274	4.21239	3.19914	1.67769	2.53e-05	0.000284079	Up	0.813011	0.61303	0.696145	2.59102	1.96168	2.71592		glycine-rich protein-1 [Cucumis sativus]
Csa4G153290	29.1732	0.467553	3.61565	3.2277	1.69051	0.000299595	0.0023901	Up	0.11618	0.229115	0.463054	0.672987	1.21124	0.850664	T16L24.100	sister chromatid cohesion 1 protein 3 [Cucumis sativus]	GO:0000798,GO:0005730,GO:0005634,GO:0003682,GO:0051301,GO:0006302,GO:0009561,GO:0000278,GO:0009555,GO:0007062	nuclear cohesin complex|nucleolus|nucleus|chromatin binding|cell division|double-strand break repair|megagametogenesis|mitotic cell cycle|pollen development|sister chromatid cohesion
Csa4G649600	20.615	0.53065	3.1941	3.23766	1.69495	0.00140265	0.00869159	Up	0.0613777	0.166431	0.223358	0.345081	0.456319	0.739873	F4I10.100	pentatricopeptide repeat-containing protein At4g33170 [Cucumis sativus]
Csa5G524720	17.9652	0.518939	3.27867	3.25223	1.70143	0.00104296	0.00678105	Up	1.35924	1.34026	2.22083	4.96235	6.17279	5.82575	MPO12.60	myb-related protein 340 [Cucumis sativus]	GO:0005634,GO:0003700,GO:0043565,GO:0009740,GO:0009867,GO:0009753,GO:0048443,GO:0080086	nucleus|DNA-binding transcription factor activity|sequence-specific DNA binding|gibberellic acid mediated signaling pathway|jasmonic acid mediated signaling pathway|response to jasmonic acid|stamen development|stamen filament development
Csa6G500640	60.6791	0.295985	5.74951	3.253	1.70177	8.95e-09	2.52e-07	Up	0.582814	0.873504	0.533257	2.50223	2.22327	2.17322		L-ascorbate oxidase [Cucumis sativus]	GO:0005576,GO:0005507,GO:0008447	extracellular region|copper ion binding|L-ascorbate oxidase activity
Csa3G251950	70.1551	0.29717	5.85176	3.33796	1.73897	4.86e-09	1.46e-07	Up	1.41686	1.5717	1.28902	6.01971	5.67553	3.51077		uncharacterized protein LOC105434869 [Cucumis sativus]
Csa6G338660	11.6595	0.676903	2.58513	3.36331	1.74988	0.00973422	0.041501	Up	0.0347594	0.239917	0.289125	0.53298	0.784178	0.670407	F28H19.7	stearoyl-[acyl-carrier-protein]	GO:0009570,GO:0016020,GO:0045300,GO:0046872,GO:0102786,GO:0006633,GO:0006631	chloroplast stroma|membrane|acyl-[acyl-carrier-protein] desaturase activity|metal ion binding|stearoyl-[acp] desaturase activity|fatty acid biosynthetic process|fatty acid metabolic process	csv00061,csv01040	Fatty acid biosynthesis|Biosynthesis of unsaturated fatty acids
Csa2G258760	57.8103	0.295519	5.98306	3.40607	1.76811	2.19e-09	7.33e-08	Up	1.772	2.49607	2.36882	8.10811	7.96071	7.95648	MRG7.3	hypothetical protein Csa_006123 [Cucumis sativus]	GO:0005886,GO:0009734,GO:0007275,GO:0040008	plasma membrane|auxin-activated signaling pathway|multicellular organism development|regulation of growth
Csa2G049920	21.7548	0.554264	3.2088	3.43075	1.77852	0.00133289	0.00830803	Up	0.330036	0.292883	0.343151	0.404846	1.35376	1.76818	K24M7.20	PREDICTED: protein DETOXIFICATION 16-like isoform X3 [Cucumis melo]	GO:0016021,GO:0005774,GO:0015297,GO:0015238,GO:0006855,GO:0009624	integral component of membrane|vacuolar membrane|antiporter activity|drug transmembrane transporter activity|drug transmembrane transport|response to nematode
Csa5G524730	27.5938	0.480278	3.72613	3.45714	1.78958	0.000194439	0.00164948	Up	1.36051	2.16704	0.326439	4.17224	4.93668	5.15833		myb-related protein 340 [Cucumis sativus]
Csa7G298820	601.234	0.116969	15.367	3.4761	1.79747	2.72e-53	1.85e-50	Up	6.36701	6.59078	6.62002	24.3384	24.3154	23.8649	T12P18.5	uncharacterized protein LOC101216228 [Cucumis sativus]
Csa2G005340	122.375	0.238464	7.60555	3.51531	1.81365	2.84e-14	2.05e-12	Up	4.57158	3.36169	4.59212	17.8215	17.0039	12.1216		hypothetical protein E6C27_scaffold41G001340 [Cucumis melo var. makuwa]
Csa4G243390	30.1737	0.497083	3.68948	3.56519	1.83398	0.000224711	0.00186549	Up	0.207958	1.38411	0.486499	1.80693	3.09217	2.89677		hypothetical protein CSA_017393 [Cucumis sativus]
Csa7G049230	689.878	0.135177	13.6205	3.583	1.84117	3.03e-42	1.17e-39	Up	14.7509	19.5086	18.5628	71.5645	72.0911	57.2643	K7L4.1	ethylene-responsive transcription factor 4 [Cucumis sativus]	GO:0016604,GO:0005634,GO:0003700,GO:0043565,GO:0009873,GO:0009864,GO:0010105,GO:0045892,GO:0009737,GO:0010200,GO:0009723	nuclear body|nucleus|DNA-binding transcription factor activity|sequence-specific DNA binding|ethylene-activated signaling pathway|induced systemic resistance, jasmonic acid mediated signaling pathway|negative regulation of ethylene-activated signaling pathway|negative regulation of transcription, DNA-templated|response to abscisic acid|response to chitin|response to ethylene
Csa3G779010	234.124	0.179985	10.241	3.58813	1.84323	1.3e-24	2.44e-22	Up	7.6137	5.32573	6.83369	27.8057	23.8898	24.1954	F11F19.11	NDR1/HIN1-like protein 10 [Cucumis sativus]	GO:0046658,GO:0009507,GO:0016021,GO:0009506,GO:0051607,GO:0010150,GO:0051707	anchored component of plasma membrane|chloroplast|integral component of membrane|plasmodesma|defense response to virus|leaf senescence|response to other organism
Csa2G370480	20.9749	0.509432	3.63185	3.60545	1.85018	0.000281396	0.00226583	Up	0.874327	0.948325	0.545442	1.96627	3.22772	3.93475		hypothetical protein Csa_021790 [Cucumis sativus]
Csa1G168920	726.168	0.127552	14.7007	3.66828	1.87511	6.38e-49	3.67e-46	Up	16.7779	17.2835	15.7168	71.7813	66.1818	56.8045	T6G21.2	LOW QUALITY PROTEIN: probable CCR4-associated factor 1 homolog 11 [Cucumis sativus]	GO:0030015,GO:0005634,GO:0000932,GO:0008408,GO:0046872,GO:0004535,GO:0003723,GO:0042742,GO:0043928,GO:0017148,GO:0000289	CCR4-NOT core complex|nucleus|P-body|3'-5' exonuclease activity|metal ion binding|poly(A)-specific ribonuclease activity|RNA binding|defense response to bacterium|exonucleolytic nuclear-transcribed mRNA catabolic process involved in deadenylation-dependent decay|negative regulation of translation|nuclear-transcribed mRNA poly(A) tail shortening	csv03018	RNA degradation
Csa6G088720	69.7506	0.285897	6.68248	3.7594	1.9105	2.35e-11	1.11e-09	Up	0.776337	0.979831	0.968624	3.33309	3.08889	4.49198	T20K18.90	adenine DNA glycosylase isoform X1 [Cucumis sativus]	GO:0005634,GO:0051539,GO:0034039,GO:0035485,GO:0046872,GO:0032357,GO:0000701,GO:0006284,GO:0006281,GO:0006298	nucleus|4 iron, 4 sulfur cluster binding|8-oxo-7,8-dihydroguanine DNA N-glycosylase activity|adenine/guanine mispair binding|metal ion binding|oxidized purine DNA binding|purine-specific mismatch base pair DNA N-glycosylase activity|base-excision repair|DNA repair|mismatch repair	csv03410	Base excision repair
Csa3G912350	9.5506	0.749578	2.5507	3.76317	1.91195	0.0107507	0.0448947	Up	0.0352065	0.0810011	0.0244037	0.119964	0.168481	0.276642	T25N20.14	SNF2 domain-containing protein CLASSY 4 [Cucumis sativus]	GO:0005634,GO:0005524,GO:0003677,GO:0004386,GO:1900370	nucleus|ATP binding|DNA binding|helicase activity|positive regulation of RNA interference	csv03440	Homologous recombination
Csa5G207940	10787.1	0.0911657	20.9962	3.76887	1.91413	7.11e-98	1.04e-94	Up	107.747	111.332	117.992	469.219	471.675	412.136	T07M07.3	zinc finger CCCH domain-containing protein 29 [Cucumis sativus]	GO:0005634,GO:0003677,GO:0003700,GO:0046872,GO:0050832,GO:0006355,GO:0010200,GO:0009409	nucleus|DNA binding|DNA-binding transcription factor activity|metal ion binding|defense response to fungus|regulation of transcription, DNA-templated|response to chitin|response to cold
Csa5G128230	10.7017	0.702395	2.76771	3.84778	1.94403	0.00564516	0.0268099	Up	0.726291	0.409227	0.215758	2.01518	1.27677	2.33467		PREDICTED: uncharacterized protein LOC103503720 isoform X1 [Cucumis melo]
Csa3G881570	23.917	0.470849	4.13217	3.85205	1.94563	3.59e-05	0.00038685	Up	0.363992	0.179454	0.346918	1.08524	1.39973	1.17006	F14D16.9/F14D16.10	DDT domain-containing protein DDR4 [Cucumis sativus]	GO:0005634	nucleus
Csa6G460000	124.625	0.639769	3.08739	3.93187	1.97522	0.00201922	0.0117321	Up	6.81863	8.09862	8.53973	19.9601	61.1822	15.7747	CEY00_Acc20523	cysteine proteinase inhibitor 1-like [Cucumis sativus]
Csa7G071600	34.4648	0.405012	4.90192	3.95956	1.98534	9.49e-07	1.62e-05	Up	0.459541	0.323659	0.580188	1.6777	1.58203	2.49717	OSJNBa0091E13.3	putative cyclin-A3-1 isoform X2 [Cucumis sativus]	GO:0000307,GO:0005737,GO:0005634,GO:0016538,GO:0019901,GO:0051301,GO:0000278,GO:0045787,GO:0008284,GO:0006468,GO:0000079,GO:0007088	cyclin-dependent protein kinase holoenzyme complex|cytoplasm|nucleus|cyclin-dependent protein serine/threonine kinase regulator activity|protein kinase binding|cell division|mitotic cell cycle|positive regulation of cell cycle|positive regulation of cell proliferation|protein phosphorylation|regulation of cyclin-dependent protein serine/threonine kinase activity|regulation of mitotic nuclear divi…
Csa5G152250	45.5084	0.344275	5.81445	4.0049	2.00177	6.08e-09	1.8e-07	Up	1.34306	1.76574	1.76882	6.40694	8.07993	6.23609	F22L4.5	heavy metal-associated isoprenylated plant protein 39 isoform X1 [Cucumis sativus]	GO:0046872,GO:0030001	metal ion binding|metal ion transport
Csa3G782630	59.0448	0.298161	6.71827	4.00867	2.00312	1.84e-11	8.78e-10	Up	0.708058	0.864399	0.806309	3.68792	3.1118	3.3599	F11F19.16	E3 ubiquitin-protein ligase PUB23 [Cucumis sativus]	GO:0005829,GO:0004842,GO:0006952,GO:0051865,GO:0016567,GO:0010200,GO:0009414	cytosol|ubiquitin-protein transferase activity|defense response|protein autoubiquitination|protein ubiquitination|response to chitin|response to water deprivation
Csa3G164500	233.308	0.170569	11.768	4.02017	2.00726	5.71e-32	1.62e-29	Up	3.11123	4.06273	4.5463	16.6326	17.0733	16.3081	MGL6.19	RING-H2 finger protein ATL2 [Cucumis sativus]	GO:0016021,GO:0046872,GO:0016740,GO:0006952,GO:0016567,GO:0010200	integral component of membrane|metal ion binding|transferase activity|defense response|protein ubiquitination|response to chitin
Csa5G494420	17.9972	0.581085	3.48096	4.06352	2.02273	0.000499624	0.00369011	Up	0.22103	0.217942	0.746892	1.12971	2.15325	1.77626		hypothetical protein Csa_008278 [Cucumis sativus]
CsaUNG031640	612.109	0.117982	17.2573	4.10121	2.03605	9.87e-67	8.93e-64	Up	9.20009	9.46429	9.89696	41.6082	41.6582	41.5228	T6J4.2	AP2/ERF and B3 domain-containing transcription factor RAV1-like [Cucumis sativus]	GO:0005634,GO:0003677,GO:0003700,GO:0009873,GO:0048527,GO:0048366,GO:0009910,GO:0045892,GO:0009741	nucleus|DNA binding|DNA-binding transcription factor activity|ethylene-activated signaling pathway|lateral root development|leaf development|negative regulation of flower development|negative regulation of transcription, DNA-templated|response to brassinosteroid
Csa1G532300	546.4	0.132377	15.6178	4.19143	2.06744	5.51e-55	4.19e-52	Up	5.41004	6.82812	7.26431	27.367	30.4336	28.9844	F23F1.6	probable protein phosphatase 2C 25 [Cucumis sativus]	GO:0005634,GO:0009536,GO:0046872,GO:0004722,GO:0009738,GO:0050832,GO:0009620,GO:0009611	nucleus|plastid|metal ion binding|protein serine/threonine phosphatase activity|abscisic acid-activated signaling pathway|defense response to fungus|response to fungus|response to wounding
Csa5G152150	17.7191	0.555096	3.74861	4.23053	2.08084	0.000177819	0.00152964	Up	0.429144	0.2821	0.743663	2.6321	1.6136	2.29915	At1g64065	uncharacterized protein LOC101212153 [Cucumis sativus]	GO:0016021,GO:0005886	integral component of membrane|plasma membrane
Csa1G602540	220.154	0.553299	3.76442	4.23642	2.08285	0.000166938	0.00145247	Up	0.67309	2.58838	2.47276	7.08692	10.6985	7.57279		L-ascorbate oxidase-like [Cucumis melo]	GO:0005576,GO:0005507,GO:0008447	extracellular region|copper ion binding|L-ascorbate oxidase activity	csv00053	Ascorbate and aldarate metabolism
Csa6G507360	21.7659	0.49451	4.29017	4.35156	2.12153	1.79e-05	0.000212531	Up	0.344375	0.237695	0.250642	1.05609	1.30663	1.5129	MtrunA17_Chr8g0371161	ammonium transporter 3 member 3 [Cucumis sativus]
Csa5G140450	327.98	0.151129	14.0893	4.37508	2.12931	4.42e-45	2e-42	Up	7.62762	8.32912	7.01312	38.5347	35.2306	33.4351	F22L4.5	heavy metal-associated isoprenylated plant protein 39 [Cucumis sativus]	GO:0046872,GO:0030001	metal ion binding|metal ion transport
Csa6G010030	490.348	0.162761	13.4679	4.56954	2.19205	2.42e-41	8.84e-39	Up	4.40328	4.87744	5.79714	25.4286	28.2945	19.3934	T28M21.16	nematode resistance protein-like HSPRO2 [Cucumis sativus]	GO:0005737,GO:0020037,GO:0046872,GO:0009816,GO:0006979,GO:0009751,GO:0019441	cytoplasm|heme binding|metal ion binding|defense response to bacterium, incompatible interaction|response to oxidative stress|response to salicylic acid|tryptophan catabolic process to kynurenine
Csa4G663720	11.4707	0.692397	3.22214	4.69459	2.231	0.00127238	0.00799644	Up	0.0612029	0.090522	0.0318175	0.328457	0.203974	0.393475	F18B13.3	Fanconi anemia group J protein homolog isoform X2 [Cucumis sativus]	GO:0005739,GO:0005634,GO:0051539,GO:0005524,GO:0004003,GO:0003677,GO:0070182,GO:0046872,GO:0032508,GO:0006310,GO:0006281,GO:0006260,GO:0036297,GO:0043007,GO:0070716,GO:0045910,GO:1904430,GO:0009555,GO:0000725,GO:0010569,GO:0006355,GO:0048364,GO:0000723,GO:0090657	mitochondrion|nucleus|4 iron, 4 sulfur cluster binding|ATP binding|ATP-dependent DNA helicase activity|DNA binding|DNA polymerase binding|metal ion binding|DNA duplex unwinding|DNA recombination|DNA repair|DNA replication|interstrand cross-link repair|maintenance of rDNA|mismatch repair involved in maintenance of fidelity involved in DNA-dependent DNA replication|negative regulation of DNA recomb…	csv03440	Homologous recombination
Csa5G167120	2125.91	0.106474	21.0613	4.7321	2.24248	1.8e-98	3.11e-95	Up	36.629	38.6456	40.7505	198.181	211.15	174.878	ERF-4	ethylene-responsive transcription factor ERF105 [Cucumis sativus]	GO:0005634,GO:0003677,GO:0003700,GO:0006952,GO:0009873	nucleus|DNA binding|DNA-binding transcription factor activity|defense response|ethylene-activated signaling pathway
Csa4G630010	300.168	0.193539	11.6466	4.77027	2.25407	2.39e-31	6.48e-29	Up	5.33327	7.19621	9.41224	40.8169	40.8741	29.0994	K7L4.1	ethylene-responsive transcription factor 4 [Cucumis sativus]	GO:0016604,GO:0005634,GO:0003700,GO:0043565,GO:0009873,GO:0009864,GO:0010105,GO:0045892,GO:0009737,GO:0010200,GO:0009723	nuclear body|nucleus|DNA-binding transcription factor activity|sequence-specific DNA binding|ethylene-activated signaling pathway|induced systemic resistance, jasmonic acid mediated signaling pathway|negative regulation of ethylene-activated signaling pathway|negative regulation of transcription, DNA-templated|response to abscisic acid|response to chitin|response to ethylene
Csa1G366990	77.4476	0.276776	8.18768	4.81038	2.26615	2.66e-16	2.53e-14	Up	0.795462	0.886658	1.07879	4.10107	4.96523	5.03993		uncharacterized protein LOC105435738 [Cucumis sativus]
Csa1G597020	33.3424	0.419356	5.41032	4.81938	2.26885	6.29e-08	1.47e-06	Up	0.263489	0.357237	0.513674	1.71708	2.39801	1.65869	At2g05940	serine/threonine-protein kinase RIPK [Cucumis sativus]
Csa1G422990	1858.42	0.0980348	23.2154	4.84306	2.27592	3.18e-119	8.64e-116	Up	28.8631	29.9554	28.4809	155.322	153.269	142.126	F14M19.90	probable xyloglucan endotransglucosylase/hydrolase protein 23-like precursor [Cucumis sativus]	GO:0048046,GO:0005618,GO:0005794,GO:0004553,GO:0016762,GO:0042546,GO:0071555,GO:0010411	apoplast|cell wall|Golgi apparatus|hydrolase activity, hydrolyzing O-glycosyl compounds|xyloglucan:xyloglucosyl transferase activity|cell wall biogenesis|cell wall organization|xyloglucan metabolic process	csv04075	Plant hormone signal transduction
Csa1G448420	8.91068	0.835621	2.75521	4.93249	2.30232	0.00586536	0.0276211	Up	0.0822283	0.405399	0.256488	0.588393	1.01187	2.29081	T31E10.18	60S ribosomal protein L18a [Cucumis sativus]	GO:0005829,GO:0022625,GO:0022626,GO:0005634,GO:0005886,GO:0042788,GO:0005774,GO:0003729,GO:0003735,GO:0009793,GO:0009860,GO:0006412	cytosol|cytosolic large ribosomal subunit|cytosolic ribosome|nucleus|plasma membrane|polysomal ribosome|vacuolar membrane|mRNA binding|structural constituent of ribosome|embryo development ending in seed dormancy|pollen tube growth|translation	csv03010	Ribosome
Csa4G637750	284.626	0.169818	13.6206	4.96925	2.31303	3.02e-42	1.17e-39	Up	3.19843	4.01387	4.66438	19.0651	22.7461	20.7853	F27G19.70	E3 ubiquitin-protein ligase RMA3 [Cucumis sativus]	GO:0036513,GO:0005783,GO:0016021,GO:0046872,GO:0061630,GO:0044390,GO:0004842,GO:0071712,GO:0006511	Derlin-1 retrotranslocation complex|endoplasmic reticulum|integral component of membrane|metal ion binding|ubiquitin protein ligase activity|ubiquitin-like protein conjugating enzyme binding|ubiquitin-protein transferase activity|ER-associated misfolded protein catabolic process|ubiquitin-dependent protein catabolic process	csv04141	Protein processing in endoplasmic reticulum
Csa6G302190	177.505	0.19932	11.6209	4.98048	2.31628	3.23e-31	8.48e-29	Up	1.2098	1.29574	1.19281	6.52461	7.35807	5.72163	T26I12.30	exocyst complex component EXO70H1 [Cucumis sativus]	GO:0005829,GO:0012505,GO:0000145,GO:0016020,GO:0005634,GO:0045335,GO:0031982,GO:0006952,GO:0006887,GO:1900426,GO:0009617,GO:0009620,GO:0002237	cytosol|endomembrane system|exocyst|membrane|nucleus|phagocytic vesicle|vesicle|defense response|exocytosis|positive regulation of defense response to bacterium|response to bacterium|response to fungus|response to molecule of bacterial origin
Csa5G517130	433.497	0.152154	15.2317	4.98489	2.31756	2.18e-52	1.43e-49	Up	4.09015	5.04947	5.28993	23.3528	28.9509	24.0153		uncharacterized protein LOC101214727 [Cucumis sativus]
Csa5G623920	9.96927	0.768243	3.02368	5.00343	2.32292	0.00249722	0.0139878	Up	0	0.438726	0.308415	1.21288	1.5209	1.19189		uncharacterized protein LOC101217123 [Cucumis sativus]
Csa2G174660	14.2198	0.626329	3.73008	5.04991	2.33626	0.000191417	0.00162748	Up	0.397617	0.548889	0.165367	2.35744	1.95716	1.7042		PREDICTED: myb-related protein Myb4-like [Cucumis melo]
Csa3G706170	46.6275	0.367399	6.3755	5.07131	2.34236	1.82e-10	7.38e-09	Up	1.02329	3.1531	1.72892	10.5911	10.4934	10.6904		hypothetical protein Csa_001555 [Cucumis sativus]
Csa5G146930	439.601	0.153118	15.4559	5.15718	2.36658	6.88e-54	5.03e-51	Up	11.0175	11.0199	11.785	71.0585	62.9115	51.8925		uncharacterized protein LOC105435432 [Cucumis sativus]
Csa1G025050	110.092	0.236598	10.053	5.20002	2.37852	8.91e-24	1.6e-21	Up	0.954621	0.788646	0.992556	4.80008	5.1063	5.25263	T1N15.22/T1N15.23	phosphomethylethanolamine N-methyltransferase isoform X2 [Cucumis sativus]	GO:0005737,GO:0000234,GO:0052667,GO:0006656	cytoplasm|phosphoethanolamine N-methyltransferase activity|phosphomethylethanolamine N-methyltransferase activity|phosphatidylcholine biosynthetic process	csv00564	Glycerophospholipid metabolism
Csa6G014510	40.1366	0.397164	6.04359	5.27911	2.4003	1.51e-09	5.22e-08	Up	0.689623	1.05776	1.19505	6.03126	3.69307	6.81462		hypothetical protein Csa_005505 [Cucumis sativus]
Csa1G422470	360.435	0.147363	16.3418	5.30802	2.40817	4.98e-60	3.94e-57	Up	4.4656	5.04369	4.34759	24.9822	26.5184	26.8825	F14M19.90	hypothetical protein Csa_019870 [Cucumis sativus]	GO:0048046,GO:0005618,GO:0005794,GO:0004553,GO:0016762,GO:0042546,GO:0071555,GO:0010411	apoplast|cell wall|Golgi apparatus|hydrolase activity, hydrolyzing O-glycosyl compounds|xyloglucan:xyloglucosyl transferase activity|cell wall biogenesis|cell wall organization|xyloglucan metabolic process
Csa4G308560	12.8148	0.652377	3.69446	5.31542	2.41018	0.000220351	0.0018341	Up	0.421905	0.332809	0.263202	1.81139	2.16324	1.80829		protein yippee-like [Cucumis sativus]	GO:0046872	metal ion binding
Csa3G878830	26.5751	0.479887	5.04126	5.34888	2.41924	4.62e-07	8.65e-06	Up	0.200832	0.544573	0.522031	3.13076	1.80202	2.25952	T6K22.80	U-box domain-containing protein 8 [Cucumis sativus]	GO:0005737,GO:0005634,GO:0004842,GO:0016567	cytoplasm|nucleus|ubiquitin-protein transferase activity|protein ubiquitination
Csa1G075060	71.2656	0.312922	7.77519	5.40026	2.43303	7.53e-15	5.89e-13	Up	1.22924	1.34675	1.98814	9.21483	10.4345	6.43935	ERF-3	ethylene-responsive transcription factor 11 [Cucumis sativus]	GO:0005634,GO:0003677,GO:0003700,GO:0006952,GO:0009873	nucleus|DNA binding|DNA-binding transcription factor activity|defense response|ethylene-activated signaling pathway
Csa7G048060	49.2143	0.393179	6.26928	5.52108	2.46495	3.63e-10	1.39e-08	Up	0.36629	0.81264	0.904508	4.30596	5.30559	2.50207		uncharacterized protein LOC101216632 [Cucumis sativus]
Csa4G214830	1032.21	0.126177	19.6042	5.55432	2.47361	1.42e-85	1.69e-82	Up	11.5588	11.685	11.0325	62.0235	76.3913	64.3101	F13H10.2	protein EARLY RESPONSIVE TO DEHYDRATION 15-like [Cucumis sativus]	GO:0005737,GO:0009617,GO:0009644,GO:0009414	cytoplasm|response to bacterium|response to high light intensity|response to water deprivation
Csa2G070210	36.6246	0.430615	5.9288	5.86866	2.55303	3.05e-09	9.78e-08	Up	0.170447	1.0084	0.649809	3.65896	4.02011	3.6527		cytochrome P450 CYP73A100 [Cucumis sativus]	GO:0016021,GO:0020037,GO:0005506,GO:0004497,GO:0016705	integral component of membrane|heme binding|iron ion binding|monooxygenase activity|oxidoreductase activity, acting on paired donors, with incorporation or reduction of molecular oxygen	csv00130,csv00940,csv00941,csv00945	Ubiquinone and other terpenoid-quinone biosynthesis|Phenylpropanoid biosynthesis|Flavonoid biosynthesis|Stilbenoid, diarylheptanoid and gingerol biosynthesis
Csa5G505160	45.5821	0.377749	6.80985	5.94804	2.57242	9.77e-12	4.85e-10	Up	0.535102	0.678378	0.278183	3.12569	2.62605	3.76782	T8O18.4	dirigent protein 10 [Cucumis sativus]	GO:0048046,GO:0048226,GO:0009809,GO:0010345	apoplast|Casparian strip|lignin biosynthetic process|suberin biosynthetic process
Csa5G571570	85.0051	0.29335	8.82418	6.01505	2.58858	1.1e-18	1.32e-16	Up	1.26362	1.83617	1.72873	7.75027	12.4124	10.618	F1O17.8	dnaJ homolog subfamily B member 6 [Cucumis sativus]	GO:0005634,GO:0003676,GO:0008270	nucleus|nucleic acid binding|zinc ion binding
Csa3G017320	272.224	0.171856	15.2292	6.13566	2.61722	2.26e-52	1.44e-49	Up	3.21722	3.30824	3.9663	20.813	24.3194	23.2937	dl4785w	hypothetical protein Csa_011730 [Cucumis sativus]	GO:0005634,GO:0003677,GO:0003700,GO:0051301,GO:0006952,GO:0009873,GO:0010087,GO:0010200	nucleus|DNA binding|DNA-binding transcription factor activity|cell division|defense response|ethylene-activated signaling pathway|phloem or xylem histogenesis|response to chitin
Csa3G119700	2639.57	0.114156	22.9568	6.15027	2.62065	1.26e-116	2.66e-113	Up	28.1979	27.3845	29.6804	168.598	209.987	179.586	F2P3.16	probable WRKY transcription factor 46 [Cucumis sativus]	GO:0005634,GO:0003700,GO:0043565,GO:0044212	nucleus|DNA-binding transcription factor activity|sequence-specific DNA binding|transcription regulatory region DNA binding
Csa2G258820	34.6175	0.433757	6.14734	6.34864	2.66645	7.88e-10	2.87e-08	Up	0.654646	1.01436	0.972371	5.06678	7.76807	4.91019	MCM23.16	auxin-responsive protein SAUR21-like [Cucumis sativus]	GO:0005886,GO:0009734,GO:0007275,GO:0040008	plasma membrane|auxin-activated signaling pathway|multicellular organism development|regulation of growth	csv04075	Plant hormone signal transduction
Csa4G308620	28.4352	0.4788	5.71168	6.65644	2.73475	1.12e-08	3.1e-07	Up	0.417532	0.494041	0.955074	3.75596	3.76784	5.63709		hypothetical protein Csa_017974 [Cucumis sativus]
Csa3G218170	18.8885	0.764655	3.63463	6.86489	2.77924	0.000278385	0.00224443	Up	0.382216	0.0753753	0.0794808	2.96941	0.744701	0.327637		legumin J [Cucumis sativus]
Csa3G483770	345.888	0.15525	17.9405	6.89363	2.78526	5.69e-72	5.7e-69	Up	3.81713	4.51657	5.02716	34.8056	31.7321	31.4117		hypothetical protein Csa_023408 [Cucumis sativus]
Csa6G303740	9.50203	0.810591	3.48586	7.08912	2.82561	0.000490563	0.00364233	Up	0.0700728	0.207282	0.218572	1.07446	1.65271	0.976084	F3G5.22	zinc finger protein ZAT18 [Cucumis sativus]	GO:0005634,GO:0003700,GO:0046872,GO:0003676,GO:0071289,GO:2000280,GO:0006355,GO:0010200	nucleus|DNA-binding transcription factor activity|metal ion binding|nucleic acid binding|cellular response to nickel ion|regulation of root development|regulation of transcription, DNA-templated|response to chitin
Csa3G123180	18.0406	0.60759	4.68647	7.19727	2.84745	2.78e-06	4.21e-05	Up	0.184778	0.121465	0.512322	2.01478	2.46328	1.71592	F4I18.26	BON1-associated protein 2 [Cucumis sativus]	GO:0016020,GO:0006952	membrane|defense response
Csa2G360620	13.8877	0.717391	3.97166	7.20619	2.84924	7.14e-05	0.000701218	Up	0.250779	0.197821	0.052149	0.615249	1.44012	1.82724	F3A4.140	hypothetical protein Csa_022277 [Cucumis sativus]	GO:0005634,GO:0003700,GO:0043565,GO:0048527,GO:0010929,GO:0006355,GO:0010200,GO:0009723,GO:0009751	nucleus|DNA-binding transcription factor activity|sequence-specific DNA binding|lateral root development|positive regulation of auxin mediated signaling pathway|regulation of transcription, DNA-templated|response to chitin|response to ethylene|response to salicylic acid
Csa3G872740	657.758	0.161327	17.6877	7.22756	2.85351	5.21e-70	4.96e-67	Up	4.2122	5.8573	7.22444	38.6788	50.3198	43.2051	T19F6.2	pathogenesis-related thaumatin-like protein 3.5 [Cucumis sativus]	GO:0006952,GO:0009617,GO:0009723	defense response|response to bacterium|response to ethylene
Csa7G450560	5.70691	1.05752	2.75033	7.50858	2.90854	0.00595352	0.0279946	Up	0.0935208	0.184429	0.0972371	1.14719	1.34263	0.50104	T12J13.17	E3 ubiquitin-protein ligase RING1-like [Cucumis melo var. makuwa]	GO:0016021,GO:0046872,GO:0016740,GO:0016567,GO:0080167	integral component of membrane|metal ion binding|transferase activity|protein ubiquitination|response to karrikin
Csa7G394060	48.1682	0.366927	8.00846	7.66626	2.93852	1.16e-15	1.03e-13	Up	1.10641	1.41825	1.15038	9.72665	9.98436	10.3141		hypothetical protein Csa_015765 [Cucumis sativus]
Csa4G650230	101.584	0.303182	9.71378	7.70096	2.94504	2.63e-22	4.39e-20	Up	2.88528	2.06907	1.09088	20.5565	16.6766	12.8348	F6A4.130	protein GLUTAMINE DUMPER 5 [Cucumis sativus]	GO:0016021,GO:0006865,GO:0080143	integral component of membrane|amino acid transport|regulation of amino acid export
Csa7G328830	212.778	0.214187	13.7832	7.73911	2.95217	3.22e-43	1.36e-40	Up	2.15244	1.76865	1.86498	16.0539	18.8434	12.8131	F9D16.280	probable WRKY transcription factor 46-like [Cucumis sativus]	GO:0009507,GO:0005634,GO:0003677,GO:0003700,GO:0043565,GO:0044212,GO:0042742,GO:0009816,GO:0010150,GO:0045893,GO:0031347,GO:2000022,GO:0009617,GO:0010200,GO:0042542,GO:0010193,GO:0009751	chloroplast|nucleus|DNA binding|DNA-binding transcription factor activity|sequence-specific DNA binding|transcription regulatory region DNA binding|defense response to bacterium|defense response to bacterium, incompatible interaction|leaf senescence|positive regulation of transcription, DNA-templated|regulation of defense response|regulation of jasmonic acid mediated signaling pathway|response to…
Csa3G018320	302.213	0.194201	15.2041	7.74171	2.95265	3.32e-52	2.04e-49	Up	2.962	2.01867	4.03079	26.0483	25.6841	22.4499	dl4780c	ethylene-responsive transcription factor 6 [Cucumis sativus]	GO:0005634,GO:0003677,GO:0003700,GO:0051301,GO:0006952,GO:0009873,GO:0010087,GO:0010200,GO:0009644,GO:0000302	nucleus|DNA binding|DNA-binding transcription factor activity|cell division|defense response|ethylene-activated signaling pathway|phloem or xylem histogenesis|response to chitin|response to high light intensity|response to reactive oxygen species
Csa6G318710	268.98	0.1807	16.3584	7.75952	2.95597	3.79e-60	3.13e-57	Up	3.20089	3.37766	3.7368	26.98	31.6722	26.4152	MGL6.19	RING-H2 finger protein ATL2 [Cucumis sativus]	GO:0016021,GO:0046872,GO:0016740,GO:0006952,GO:0016567,GO:0010200	integral component of membrane|metal ion binding|transferase activity|defense response|protein ubiquitination|response to chitin
Csa6G516960	1089.04	0.11425	26.1696	7.94412	2.98989	5.89e-151	2.8e-147	Up	9.60438	10.4011	9.85801	79.382	88.0933	85.1438	T1F9.17	F-box protein At4g05010 [Cucumis sativus]	GO:0009961,GO:0009737,GO:0009617,GO:0009753,GO:0006970,GO:0009751,GO:0009651,GO:0009611	response to 1-aminocyclopropane-1-carboxylic acid|response to abscisic acid|response to bacterium|response to jasmonic acid|response to osmotic stress|response to salicylic acid|response to salt stress|response to wounding
Csa5G152240	124.161	0.258413	11.6201	8.01543	3.00278	3.26e-31	8.48e-29	Up	1.04784	2.36161	2.80151	16.4495	17.9598	18.2048	F22L4.5	heavy metal-associated isoprenylated plant protein 39 isoform X2 [Cucumis sativus]	GO:0046872,GO:0030001	metal ion binding|metal ion transport
Csa3G728070	6.26477	1.04652	2.90512	8.22639	3.04026	0.00367114	0.0191251	Up	0.216332	0.106655	0.112464	0.995134	0.665522	2.20211		hypothetical protein Csa_002168 [Cucumis sativus]
Csa5G636620	420.154	0.170143	17.9795	8.33448	3.05909	2.82e-72	2.98e-69	Up	4.22105	4.81073	5.75673	52.7872	41.0368	37.2991	K5K13.13	probable calcium-binding protein CML47 [Cucumis sativus]	GO:0005634,GO:0005509,GO:0030234,GO:0019722,GO:0051300	nucleus|calcium ion binding|enzyme regulator activity|calcium-mediated signaling|spindle pole body organization
Csa4G296260	701.185	0.131994	23.1859	8.34205	3.0604	6.33e-119	1.5e-115	Up	4.18806	4.62265	5.23189	39.1694	44.2932	41.0241	F23M19.3	uncharacterized protein LOC101204955 [Cucumis sativus]
Csa5G547610	510.494	0.146541	21.0057	8.4456	3.0782	5.82e-98	9.22e-95	Up	5.13894	6.64724	6.09005	49.6509	57.7978	52.9917	T8O11.16	nudix hydrolase 17, mitochondrial [Cucumis sativus]	GO:0005737,GO:0005739,GO:0005634,GO:0016787,GO:0046872	cytoplasm|mitochondrion|nucleus|hydrolase activity|metal ion binding
Csa1G265630	168.879	0.219495	14.1516	8.61116	3.10621	1.83e-45	8.46e-43	Up	2.56015	2.30801	2.81399	20.7869	24.3031	25.3159		uncharacterized protein LOC105434480 [Cucumis sativus]
Csa3G889870	9.67424	0.8725	3.57683	8.69859	3.12078	0.000347788	0.00271978	Up	0.084825	0.418201	0	1.04053	1.91367	1.72692		hypothetical protein Csa_002099 [Cucumis sativus]
Csa4G303070	11.5789	0.783643	4.03434	8.94745	3.16148	5.48e-05	0.000557573	Up	0	0.625655	0.263893	2.85394	2.9931	2.58358		hypothetical protein Csa_017945 [Cucumis sativus]
Csa4G165910	50.7467	0.383291	8.27022	8.99985	3.1699	1.34e-16	1.3e-14	Up	0.619875	0.475391	1.00257	5.77329	6.49785	7.74899		uncharacterized protein LOC101216264 [Cucumis sativus]
Csa7G009180	5.16525	1.25643	2.52666	9.02904	3.17457	0.0115153	0.0475906	Up	0.2755	0	0.143224	0.140812	1.97761	1.9188		hypothetical protein Csa_020526 [Cucumis sativus]
Csa2G174670	13.8882	0.736095	4.39281	9.40564	3.23353	1.12e-05	0.000142194	Up	0.252482	0.746865	0	3.35522	2.71856	4.05803	At3g23250	PREDICTED: myb-related protein Myb4-like [Cucumis melo]	GO:0005634,GO:0003700,GO:0043565,GO:0044212,GO:0030154,GO:0009733,GO:0046686,GO:0010200,GO:0009409,GO:0009723,GO:0009753,GO:0009651,GO:0009414	nucleus|DNA-binding transcription factor activity|sequence-specific DNA binding|transcription regulatory region DNA binding|cell differentiation|response to auxin|response to cadmium ion|response to chitin|response to cold|response to ethylene|response to jasmonic acid|response to salt stress|response to water deprivation
Csa2G382470	7.20413	1.00463	3.24363	9.57088	3.25865	0.00118015	0.00751116	Up	0.230789	0	0.23996	1.76939	2.01166	0.989165		PREDICTED: uncharacterized protein LOC103488565 [Cucumis melo]
Csa3G889770	877.507	0.160434	20.7819	10.0849	3.33412	6.31e-96	8.57e-93	Up	5.33803	8.55314	10.5666	90.8223	92.2151	77.7663	PHI-1	protein PHOSPHATE-INDUCED 1 [Cucumis sativus]
Csa2G354820	756.519	0.143627	23.2868	10.1584	3.3446	6.04e-120	1.91e-116	Up	7.95372	9.01214	11.3891	100.562	112.256	92.7751	T22C5.18	zinc finger protein ZAT10 [Cucumis sativus]	GO:0005634,GO:0003700,GO:0046872,GO:0043565,GO:0035264,GO:0045892,GO:0010117,GO:0015979,GO:0009737,GO:0010200,GO:0009409,GO:0009644,GO:0006979,GO:0009651,GO:0009414,GO:0009611	nucleus|DNA-binding transcription factor activity|metal ion binding|sequence-specific DNA binding|multicellular organism growth|negative regulation of transcription, DNA-templated|photoprotection|photosynthesis|response to abscisic acid|response to chitin|response to cold|response to high light intensity|response to oxidative stress|response to salt stress|response to water deprivation|response t…
Csa3G081900	147.641	0.250714	13.5314	10.5015	3.39252	1.02e-41	3.8e-39	Up	2.50088	2.13715	1.7335	23.6047	27.4407	20.3657	M4I22.90	calcium-binding protein KRP1 [Cucumis sativus]	GO:0005509,GO:0080167	calcium ion binding|response to karrikin
Csa6G363530	648.393	0.144292	24.1113	11.1507	3.47907	1.9e-128	7.23e-125	Up	7.40259	6.9704	6.86467	78.6709	92.1872	81.4629		uncharacterized protein LOC105435852 [Cucumis sativus]
Csa5G165850	377.777	0.165017	21.2616	11.3807	3.50852	2.58e-100	4.9e-97	Up	2.38767	2.80707	3.19867	33.8418	35.079	32.5704	dl4785w	ethylene-responsive transcription factor 1A [Cucumis sativus]	GO:0005634,GO:0003677,GO:0003700,GO:0051301,GO:0006952,GO:0009873,GO:0010087,GO:0010200	nucleus|DNA binding|DNA-binding transcription factor activity|cell division|defense response|ethylene-activated signaling pathway|phloem or xylem histogenesis|response to chitin
Csa1G597730	11.7574	0.850774	4.36438	13.1146	3.7131	1.27e-05	0.000159341	Up	0	0.2821	0.0743663	1.53539	1.76029	1.68604	T29M8.8	ethylene-responsive transcription factor ERF017 [Cucumis sativus]	GO:0005634,GO:0003677,GO:0003700,GO:0009873	nucleus|DNA binding|DNA-binding transcription factor activity|ethylene-activated signaling pathway
Csa4G642460	2190.19	0.123254	30.7469	13.8294	3.78967	1.34e-207	8.52e-204	Up	11.648	13.0889	14.1217	212.707	197.875	161.027	T19N18.70	zinc finger protein ZAT10 [Cucumis sativus]	GO:0005634,GO:0003700,GO:0046872,GO:0000978,GO:0044212,GO:0055062,GO:2000280,GO:0010200	nucleus|DNA-binding transcription factor activity|metal ion binding|RNA polymerase II proximal promoter sequence-specific DNA binding|transcription regulatory region DNA binding|phosphate ion homeostasis|regulation of root development|response to chitin
CsaUNG026670	5.56314	1.29182	3.04531	15.2846	3.934	0.00232438	0.0131702	Up	0.103867	0	0	0.637057	0.692329	0.38953
Csa6G363540	58.5428	0.431115	9.72504	18.2853	4.19261	2.36e-22	3.97e-20	Up	0.566605	0.651805	0.490934	8.88105	12.7827	11.6365		hypothetical protein Csa_018923 [Cucumis sativus]
Csa7G048100	2.13374	1.73786	2.59882	22.8857	4.51638	0.00935458	0.0402444	Up	0	0	0	0.295958	0.494824	0.517041	T2D23.3	heavy metal-associated isoprenylated plant protein 28 [Cucumis sativus]	GO:0046872,GO:0030001	metal ion binding|metal ion transport
Csa2G381710	2.59906	1.65004	2.9112	27.9273	4.8036	0.00360038	0.0188351	Up	0	0	0	0.406074	0.232777	0.304035		uncharacterized protein LOC101208140 [Cucumis sativus]
Csa1G002110	29.9826	0.684536	7.07864	28.7519	4.84559	1.46e-12	8.34e-11	Up	0	0.286623	0.302234	6.73527	5.1668	6.02172	B1139B11.19	putative calcium-binding protein CML19 [Cucumis sativus]	GO:0005634,GO:0005509,GO:0019722	nucleus|calcium ion binding|calcium-mediated signaling	csv04626	Plant-pathogen interaction
Csa6G486710	5.58698	1.4166	3.45799	29.8283	4.89861	0.000544214	0.00395794	Up	0	0	0.125994	0.990977	1.24264	1.94765		hypothetical protein Csa_004350 [Cucumis sativus]
Csa7G253790	3.4593	1.57345	3.31292	37.0837	5.21271	0.000923286	0.00613201	Up	0	0	0	1.04603	1.31168	3.28937		hypothetical protein Csa_016134 [Cucumis sativus]
Csa3G710870	2148.6	0.147101	36.1265	39.788	5.31426	8.69e-286	1.65e-281	Up	2.81515	4.02496	4.28077	136.117	176.169	156.478	F23A5.19	probable WRKY transcription factor 40 [Cucumis sativus]	GO:0005634,GO:0003700,GO:0043565,GO:0044212,GO:0042742,GO:0050832,GO:0045892,GO:0031347,GO:0010200,GO:0002237,GO:0009751,GO:0009611	nucleus|DNA-binding transcription factor activity|sequence-specific DNA binding|transcription regulatory region DNA binding|defense response to bacterium|defense response to fungus|negative regulation of transcription, DNA-templated|regulation of defense response|response to chitin|response to molecule of bacterial origin|response to salicylic acid|response to wounding
Csa2G348240	4.09146	1.51857	3.59309	43.9069	5.45638	0.000326775	0.0025788	Up	0	0	0	1.44835	0.726468	2.46703		hypothetical protein Csa_018733 [Cucumis sativus]
Csa1G303710	5.08178	1.43963	4.00704	54.5174	5.76864	6.15e-05	0.000616242	Up	0	0	0	0.878666	1.21199	1.38153		hypothetical protein Csa_004669 [Cucumis sativus]
Csa1G589710	1436.44	0.180994	32.015	55.5046	5.79454	6.73e-225	6.4e-221	Up	1.25545	1.7512	1.65556	90.0855	109.556	74.8404	T22E16.10	hypothetical protein Csa_007306 [Cucumis sativus]	GO:0005634,GO:0046872,GO:0004518	nucleus|metal ion binding|nuclease activity
Csa3G180260	183.564	0.493352	13.6859	107.781	6.75196	1.23e-42	4.99e-40	Up	0.156136	0.102637	0.270568	20.1637	23.8567	16.1167	M7J2.150	dehydration-responsive element-binding protein 1A [Cucumis sativus]	GO:0005634,GO:0003677,GO:0003700,GO:0009631,GO:0009409,GO:0009414	nucleus|DNA binding|DNA-binding transcription factor activity|cold acclimation|response to cold|response to water deprivation
